# Supplementary material for: Photocatalytic C–F alkylation; facile access to multifluorinated arenes
Source: Royal Society of Chemistry journal article supplement (doi:10.1039/c5sc03013g), 2015-01-01

**Photocatalytic C–F Alkylation; Facile Access to Multifluorinated Arenes**

Anuradha Singh, Jacklyn Kubik, and Jimmie D. Weaver\*

Department of Chemistry, Oklahoma State University, Stillwater, OK 74078

[jimmie.weaver@okstate.edu](mailto:jimmie.weaver@okstate.edu)

Supporting Information

Table of contents:-

|                                                                    |     |
|--------------------------------------------------------------------|-----|
| General experimental                                               | S2  |
| Synthesis of substrates                                            | S3  |
| Photocatalytic reductive alkylation reactions and characterization | S7  |
| References                                                         | S27 |
| NMR spectra                                                        | S29 |

## **General Experimental**

All reagents were obtained from commercial suppliers (Sigma-Aldrich, Oakwood chemicals, Alfa Aesar, Matrix Scientific, VWR) and used without further purification unless otherwise noted. Acetonitrile (CH<sub>3</sub>CN) was dried over molecular sieves. *N,N*-diisopropylethylamine was purchased from Sigma-Aldrich and was distilled and stored over anhydrous potassium hydroxide. Photocatalysts Ir(ppy)<sub>3</sub> *fac*-tris(2-phenyl pyridinato-*C*<sup>2</sup>, *N*)iridium(III), Ir(tbppy)<sub>3</sub> *fac*-tris[2-(4-*tert*-butylphenyl)pyridinato-*C*<sup>2</sup>, *N*]iridium(III), Ir(CF<sub>3</sub>ppy)<sub>3</sub> *fac*-tris[2-(4-trifluoromethylphenyl)pyridinato-*C*<sup>2</sup>, *N*]iridium(III), Ir(Fppy)<sub>3</sub> *fac*-tris[2-(4-fluorophenyl)pyridinato-*C*<sup>2</sup>, *N*]iridium(III), Ir(dFppy)<sub>3</sub> *fac*-tris(2-(4,6-difluorophenyl)pyridinato- *C*<sup>2</sup>, *N*)iridium(III), [Ir(dF(CF<sub>3</sub>)ppy)<sub>2</sub>(dtbbpy)](PF<sub>6</sub>) [4,4'-Bis(*tert*-butyl)-2,2'-bipyridine]bis[3,5-difluoro-2-[5-(trifluoromethyl)-2-pyridinyl]phenyl]iridium(III) hexafluorophosphate were synthesized according to literature procedure.<sup>1</sup> Methyl 2,3,4,5,6-pentafluorobenzoate, 2-(perfluorophenyl)benzo[*d*]oxazole, 1,2,4,5-tetrafluoro-3-phenoxy-6-(trifluoromethyl)benzene, *O*-ethyl *S*-(perfluorophenyl) carbonothioate, *N*-(2,3,5,6-tetrafluoro-4-(trifluoromethyl)phenyl)acetamide, 4,5,6,7-tetrafluoro-2-phenylbenzofuran, methyl 2,3,5,6-tetrafluoro-4-(2-methoxy-2-oxoethyl)benzoate were synthesized according to literature procedures.<sup>2,3</sup> Reactions were monitored by <sup>19</sup>F NMR and GC-MS (QP 2010S, Shimadzu equipped with auto sampler). NMR spectra were obtained on a 400 MHz Bruker Avance III spectrometer or a 400 MHz Unity Inova spectrometer. <sup>1</sup>H and <sup>13</sup>C NMR chemical shifts are reported in ppm relative to the residual solvent peak while <sup>19</sup>F is set relative to an external standard. IR spectra were recorded on a Nicolet iS50 FT-IR. Melting points were determined on a Mel-Temp apparatus. Optical rotation was measured on Autopol V by Rudolph Research Analytical. High resolution mass spectra were obtained on LTQ-OrbitrapXL by Thermo Scientific Ltd. Purifications were carried out using Teledyne Isco Combiflash Rf 200i flash chromatograph with Redisep Rf normal phase silica (4 g, 12 g, 24 g, 40 g, or 80 g) as well as reverse phase C18 (26 g) column with product detection at 254, 280 nm and by ELSD (evaporative light scattering detector). Some isolations were performed using Sorbent Technology Silica Prep TLC Plates, w/UV254, glass backed, 1000 μm, 20 x 20 cm, and were visualized with ultraviolet light. Substrate synthesis reactions were monitored by thin layer chromatography (TLC), obtained from Sorbent Technology Silica XHL TLC Plates, w/UV254, glass backed, 250 μm, and were visualized with ultraviolet light or potassium permanganate.

## **Photocatalytic Reaction Set up**

Photocatalytic reactions were set up in a light bath as described below. Strips of blue LED's (18 LED's/ft.) were purchased from Solid Apollo. The strips (4.9 ft) were wrapped around on the walls of glass crystallization dish and secured with masking tape and then wrapped with aluminum foil. A lid which rest on the top was fashioned from cardboard and holes were made such that NMR tubes were held firmly in the cardboard lid which was placed on the top of bath. Water was added to the bath such that the tubes were submerged in the water which was maintained at 45 °C with the aid of a sand bath connected to a thermostat. Use of slightly elevated temperatures allows

a constant reaction temperature to be maintained whereas attempts to run the reaction at ambient temperature led to temperature fluctuation.

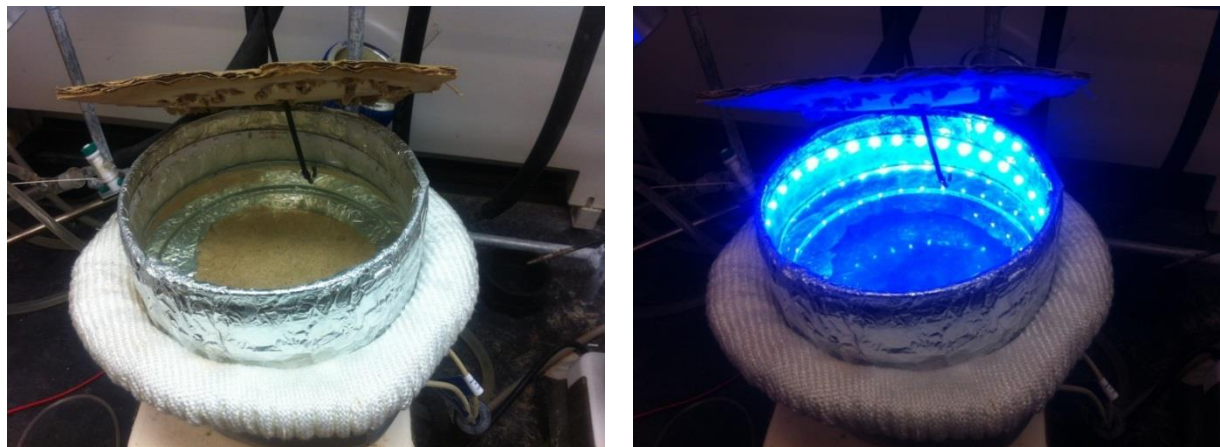

### General Procedure A: Aminolysis reaction of fluoroarylated Meldrum's acid adduct with glycine ethyl ester hydrochloride

Fluoroarylated Meldrum's acid adduct was prepared according to the literature procedure<sup>3</sup>, though they are available for purchase from Aspira Scientific. Aminolysis with glycine ethyl ester hydrochloride of fluoroarylated Meldrum's acid adduct was performed using a modified literature procedure.<sup>3</sup> In a 25 mL of round bottom pressure flask, fluoroarylated Meldrum's acid adduct (1 equiv) (0.50 g, 0.94 mmol), ethyl 2-aminoacetate hydrochloride (3.0 equiv) and acetonitrile (0.2 M) were added and heated at 80 °C. The reaction was monitored by <sup>19</sup>F NMR (reaction was cooled, then an aliquot was transferred to an NMR tube containing C<sub>6</sub>D<sub>6</sub> sealed capillary tube). After completion, it was concentrated *in vacuo*, dissolved in ethyl acetate (10 mL), washed with 1M HCl (1 x 20 mL), water (4 x 20 mL), dried over anhydrous MgSO<sub>4</sub>, filtered and concentrated *in vacuo* to leave the crude product. The resultant crude residue was purified by automated flash chromatography using hexane:ethyl acetate.

### Synthesis of Ethyl (2-(2,3,5,6-tetrafluoro-4-(trifluoromethyl)phenyl)acetyl)glycinate

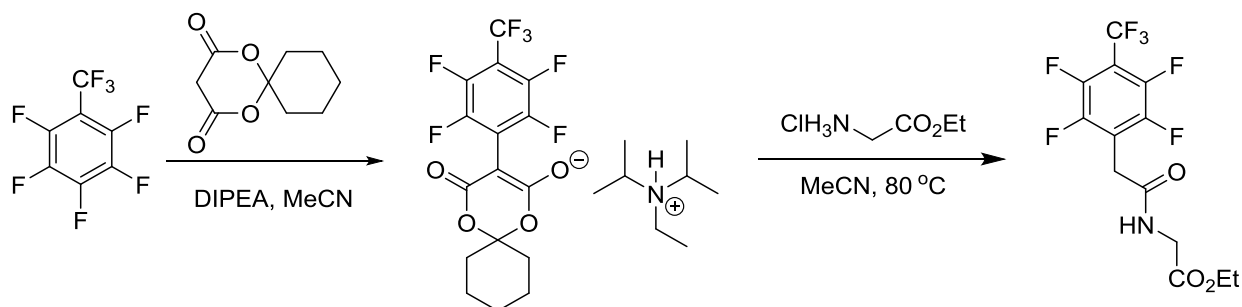

**General procedure A** was followed using *N*-ethyl-*N*-isopropylpropan-2-aminium 4-oxo-3-(2,3,5,6-tetrafluoro-4-(trifluoromethyl)phenyl)-1,5-dioxaspiro[5.5]undecan-2-olate<sup>3</sup> (0.50 g, 0.94 mmol), ethyl 2-aminoacetate hydrochloride (0.39 g, 2.8 mmol, 3.0 equiv) and acetonitrile (4 mL). The crude residue was purified by automated flash chromatography using hexane:ethyl acetate (0 % EtOAc for 5 cv and ramped to 100 % EtOAc for 5-30 cv and then held at 100% EtOAc 30-35 cv) on a 12 g silica column to afford **ethyl (2-(2,3,5,6-tetrafluoro-4-(trifluoromethyl)phenyl)acetyl)glycinate** in 92% yield (0.31 g, 0.86 mmol) as a white solid. <sup>19</sup>F NMR (376 MHz, Chloroform-*d*) δ -56.36 (t, *J* = 21.6 Hz, 3H), -140.17 (td, *J* = 16.1, 6.2 Hz, 2H), -140.70 (m, 2F). <sup>1</sup>H NMR (400 MHz, Chloroform-*d*) δ 6.20 (s, 1H), 4.27 (q, *J* = 7.2 Hz, 2H), 4.10 (d, *J* = 4.9 Hz, 2H), 3.80 (t, *J* = 1.6 Hz, 2H), 1.33 (t, *J* = 7.1 Hz, 3H). <sup>13</sup>C{<sup>1</sup>H} NMR (101 MHz, Chloroform-*d*) δ 169.6, 166.4, 145.5 – 142.5 (m), 118.3 (t, *J* = 18.0 Hz), 146.9 – 144.0 (m), 120.7 (q, 273.1 Hz), 109.1 (ddd, *J* = 47.2, 23.4, 12.0 Hz), 61.8, 41.8, 30.8 – 28.9 (m), 14.0.

### Synthesis of methyl 4-(2-((2-ethoxy-2-oxoethyl)amino)-2-oxoethyl)-2,3,5,6-tetrafluorobenzoate

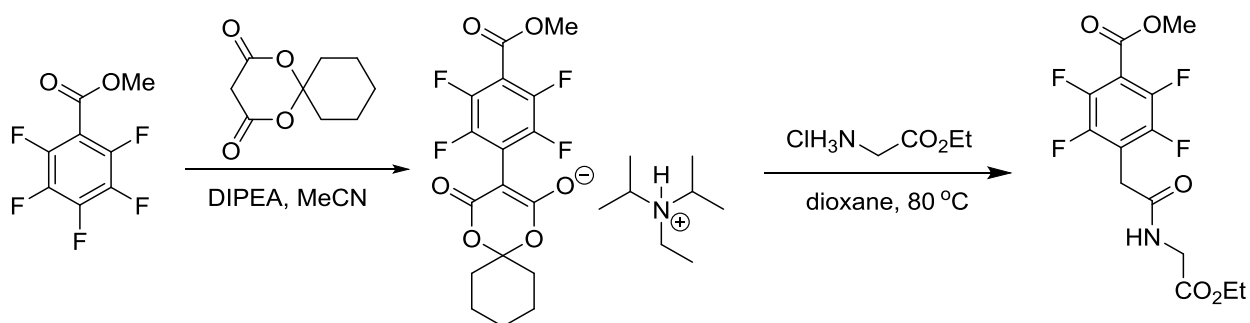

**General procedure A** was followed using *N*-ethyl-*N*-isopropylpropan-2-aminium 4-oxo-3-(2,3,5,6-tetrafluoro-4-(methoxycarbonyl)phenyl)-1,5-dioxaspiro[5.5]undecan-2-olate<sup>3</sup> (2.0 g, 3.8 mmol), ethyl 2-aminoacetate hydrochloride (1.6 g, 11.4 mmol, 3.0 equiv) and **dioxane** (37 mL, **instead of MeCN** as described in the original procedure) and heated at 80 °C. The crude residue was purified by automated flash chromatography using hexane:ethyl acetate (0 % EtOAc for 5 cv and ramped slowly to 50 % EtOAc for 5-30 cv and then held at 100% EtOAc 30-35 cv) on a 24 g silica column to afford **methyl 4-(2-((2-ethoxy-2-oxoethyl)amino)-2-oxoethyl)-2,3,5,6-tetrafluorobenzoate** in 81% yield (1.05 g, 3.0 mmol) as a white solid. <sup>19</sup>F NMR (376 MHz, Chloroform-*d*) δ -139.36 – -139.65 (m, 2F), -141.07 – -141.32 (m, 2F). <sup>1</sup>H NMR (400 MHz, Chloroform-*d*) δ 6.15 (s, 1H), 4.27 (q, *J* = 7.1 Hz, 2H), 4.09 (d, *J* = 4.9 Hz, 2H), 4.01 (s, 3H), 3.78 (t, *J* = 1.6 Hz, 2H), 1.32 (t, *J* = 7.2 Hz, 3H). <sup>13</sup>C{<sup>1</sup>H} NMR (101 MHz, Chloroform-*d*) δ 169.6, 167.0, 160.1, 144.5 (ddt, *J* = 256.8, 15.7, 4.6 Hz), 145.1 (ddt, *J* = 248.3, 14.3, 5.2 Hz), 117.2 (t, *J* = 18.2 Hz), 111.6 (t, *J* = 15.7 Hz), 61.7, 53.3, 41.7, 29.8, 14.0.

### Synthesis of ethyl (2-(perfluoropyridin-4-yl)acetyl)glycinate

**General procedure A** was followed using *N*-ethyl-*N*-isopropylpropan-2-aminium 4-oxo-3-(perfluoropyridin-4-yl)-1,5-dioxaspiro[5.5]undecan-2-olate<sup>3</sup> (1.0 g, 2.15 mmol), ethyl 2-aminoacetate hydrochloride (0.90 g, 6.46 mmol, 3.0 equiv) and acetonitrile (5.0 mL) and heated at 80 °C.

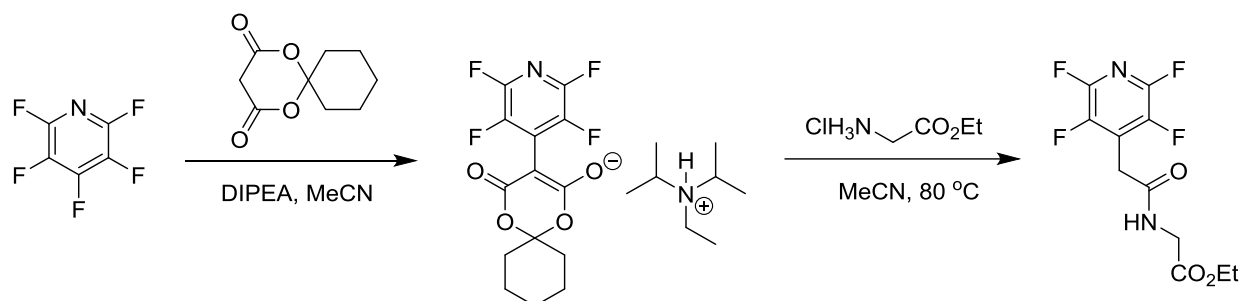

The crude residue was purified by automated flash chromatography using hexane:ethyl acetate (0 % EtOAc for 5 cv and ramped slowly to 50 % EtOAc for 5-30 cv and then held at 100% EtOAc 30-35 cv) on a 24 g silica column to afford **ethyl (2-(perfluoropyridin-4-yl)acetyl)glycinate** in 97 % yield (0.615 g, 2.09 mmol) as a white solid. <sup>19</sup>F NMR (376 MHz, Chloroform-*d*) δ -90.42 – -90.82 (m, 2F), -143.14 – -143.58 (m, 2F). <sup>1</sup>H NMR (400 MHz, Chloroform-*d*) δ 6.22 (s, 1H), 4.28 (q, *J* = 7.2 Hz, 2H), 4.10 (d, *J* = 4.9 Hz, 2H), 3.83 (s, 2H), 1.33 (t, *J* = 7.1 Hz, 3H). NMR matched with the literature value.<sup>3</sup>

### Synthesis of ethyl (2-(3-chloro-2,5,6-trifluoropyridin-4-yl)acetyl)glycinate

**General procedure A** was followed using *N*-ethyl-*N*-isopropylpropan-2-aminium 3-(3-chloro-2,5,6-trifluoropyridin-4-yl)-4-oxo-1,5-dioxaspiro[5.5]undecan-2-olate<sup>3</sup> (1.0 g, 2.1 mmol), ethyl 2-aminoacetate hydrochloride (0.87 g, 6.24 mmol, 3.0 equiv) and acetonitrile (5 mL) and heated at 80 °C.

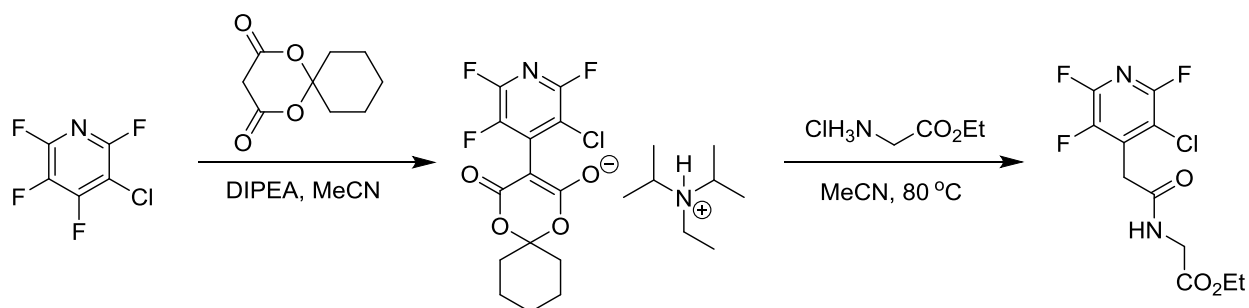

The crude residue was purified by automated flash chromatography using hexane:ethyl acetate (0 % EtOAc for 5 cv and ramped slowly to 50 % EtOAc for 5-30 cv and then held at 100% EtOAc 30-35 cv) on a 24 g silica column to afford **ethyl (2-(3-chloro-2,5,6-trifluoropyridin-4-yl)acetyl)glycinate** in 93 % yield (0.59 g, 1.9 mmol) as a white solid. <sup>19</sup>F NMR (376 MHz, Chloroform-*d*) δ -73.39 (dd, *J* = 28.1, 12.5 Hz, 1F), -88.54 (dd, *J* = 21.5, 12.6 Hz, 1F), -143.10

(dd,  $J = 28.1, 21.4$  Hz, 1F).  $^1\text{H}$  NMR (400 MHz, Chloroform- $d$ )  $\delta$  6.17 (s, 1H), 4.25 (q,  $J = 7.2$  Hz, 2H), 4.07 (d,  $J = 4.9$  Hz, 2H), 3.90 (d,  $J = 1.9$  Hz, 2H), 1.30 (t,  $J = 7.1$  Hz, 3H).  $^{13}\text{C}\{^1\text{H}\}$  NMR (101 MHz, Chloroform- $d$ )  $\delta$  169.5, 165.8, 150.9 (ddd,  $J = 243.3, 12.4, 2.9$  Hz), 147.0 (ddd,  $J = 247.2, 17.6, 13.6$  Hz), 141.7 (ddd,  $J = 257.7, 26.7, 6.3$  Hz), 138.2 (dt,  $J = 15.2, 2.3$  Hz), 114.0 (dd,  $J = 34.4, 6.6$  Hz), 61.8, 41.7, 33.9 (t,  $J = 2.3$  Hz), 14.1.

### Synthesis of methyl 2-(3-chloro-2,5,6-trifluoropyridin-4-yl)acetate

**Methyl 2-(3-chloro-2,5,6-trifluoropyridin-4-yl)acetate** was synthesized by the literature procedure.<sup>3</sup> In a 100 mL round bottom pressure flask, *N*-ethyl-*N*-isopropylpropan-2-aminium 3-(3-chloro-2,5,6-trifluoropyridin-4-yl)-4-oxo-1,5-dioxaspiro[5.5]undecan-2-olate<sup>3</sup> (2.0 g, 4.2 mmol), concentrated hydrochloric acid (434  $\mu\text{L}$ , 5.0 mmol, 1.2 equiv) and methanol (10 mL) and heated at 80 °C. Reaction was monitored by  $^{19}\text{F}$  NMR (reaction was cooled, then an aliquot was

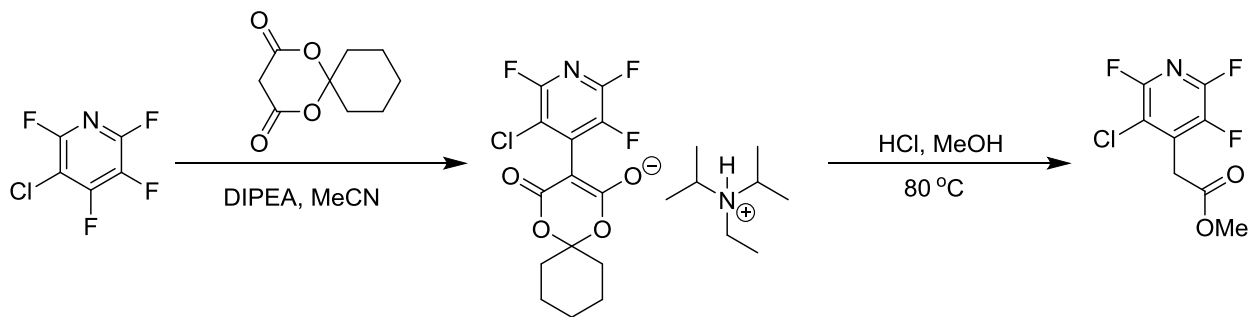

placed in an NMR tube containing  $\text{C}_6\text{D}_6$  sealed capillary tube). After the completion of reaction, it was concentrated *in vacuo*, dissolved in  $\text{CH}_2\text{Cl}_2$  (50 mL), washed with sat  $\text{NaHCO}_3$  (1 x 20 mL), water (2 x 20 mL), dried over anhydrous  $\text{Na}_2\text{SO}_4$ , filtered and concentrated *in vacuo* to leave the crude product. The resultant crude residue was purified by automated flash chromatography using dichloromethane:MeOH (0 % DCM for 15 cv and ramped to 20 % MeOH for 15-20 cv and then held at 20% MeOH 20-25 cv) on a 24 g silica column to afford **methyl 2-(3-chloro-2,5,6-trifluoropyridin-4-yl)acetate** in 100% yield (1.0 g, 4.2 mmol) as a colorless liquid.  $^{19}\text{F}$  NMR (376 MHz, Chloroform- $d$ )  $\delta$  -73.48 (dd,  $J = 28.2, 12.7$  Hz, 1F), -88.56 (dd,  $J = 21.4, 12.7$  Hz, 1F), -143.18 – -143.54 (m, 1F).  $^1\text{H}$  NMR (400 MHz, Chloroform- $d$ )  $\delta$  3.97 (d,  $J = 1.9$  Hz, 2H), 3.79 (s, 3H).  $^{13}\text{C}\{^1\text{H}\}$  NMR (101 MHz, Chloroform- $d$ )  $\delta$  167.3, 150.8 (ddd,  $J = 243.1, 12.4, 2.9$  Hz), 146.9 (ddd,  $J = 246.9, 17.5, 13.6$  Hz), 141.5 (ddd,  $J = 258.0, 26.8, 6.3$  Hz), 138.0 – 137.3 (m), 114.0 (dd,  $J = 34.6, 6.6$  Hz), 52.8, 32.3 (q,  $J = 2.1$  Hz).

### Synthesis of Dimethyl-7-oxabicyclo[2.2.1]hept-5-ene *exo,exo*-2,3-dicarboxylate

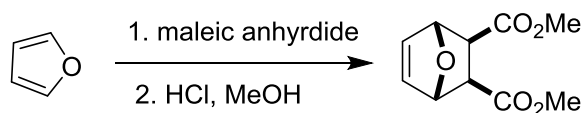

**Dimethyl-7-oxabicyclo[2.2.1]hept-5-ene *exo,exo*-2,3-dicarboxylate** was synthesized according to the literature<sup>4</sup> procedure. In a 100 mL round bottom flask, furan (18.0 mL, 249.0 mmol) and maleic anhydride (5.1 g, 52.0 mmol) were added. The reaction mixture was stirred at room temperature overnight. Reaction mixture was concentrated *in vacuo* to obtain the Diels-Alder adduct as white solid which was subjected to reflux in methanol (100 mL) in the presence of catalytic amount of concentrated hydrochloric acid (425  $\mu$ l, 4.0 mmol) for 2 h. Reaction mixture was cooled to room temperature and methanol was removed via rotary evaporation. Residue was dissolved in DCM (50 mL), washed with sat. NaHCO<sub>3</sub> (2 x 30 mL), dried over Na<sub>2</sub>SO<sub>4</sub>, filtered, and concentrated *in vacuo*. The crude material was purified by flash chromatography using hexane:ethyl acetate (0 % EtOAc for 5 cv and ramped slowly to 50 % EtOAc for 5-30 cv and then held at 100% EtOAc 30-35 cv) on a 24 g silica column to afford **dimethyl-7-oxabicyclo[2.2.1]hept-5-ene *exo,exo*-2,3-dicarboxylate** in 51% yield over two steps (5.6 g, 26.4 mmol) as a white solid which matched with the literature values.<sup>5</sup> <sup>1</sup>H NMR (400 MHz, Chloroform-*d*)  $\delta$  6.48 (s, 2H), 5.30 (s, 2H), 3.74 (s, 6H), 2.85 (s, 2H).

### Photocatalytic C-F Alkylation

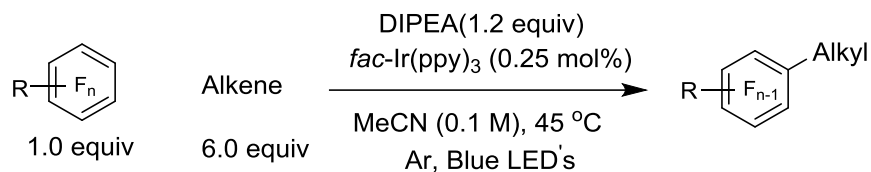

#### General procedure B for the photocatalytic C-F Alkylation reaction (standard conditions)

An NMR tube was charged with fluoroarenes (0.1 mmol, 1.0 equiv), alkene (0.6 mmol, 6.0 equiv or 0.48 mmol, 4.8 equiv), *N,N*-diisopropylethylamine (0.12 mmol, 1.2 equiv) *fac*-tris(2-phenylpyridinato-*C*<sup>2</sup>, *N*) Iridium(III) (Ir(ppy)<sub>3</sub>) (0.25 mM, 1 mL in MeCN), sealed glass capillary containing C<sub>6</sub>D<sub>6</sub> and was capped with NMR septum (Ace glass, part no. 9096-25). When reaction was run in greater than 0.1 mmol of fluoroarenes, more than one NMR tube was used to set up reaction and each NMR tube had 1 mL of reaction mixture. The reaction was degassed via Ar bubbling for 15 min at 0 °C (to avoid evaporation of *N,N*-diisopropylethylamine) and then placed in a light bath (*vide supra*) such that the lower portion of the tube was submerged under the water bath which was maintained at 45 °C. The reaction was monitored periodically by <sup>19</sup>F NMR. After the complete consumption of starting material, CH<sub>3</sub>CN was removed via rotavap. The residue was treated with deionized water (2 mL) and extracted with DCM (3 x 1 mL). The organic portions were combined and dried with anhydrous MgSO<sub>4</sub>. The crude product was concentrated *in vacuo* and purified by normal phase or reverse phase chromatography.

#### General procedure C for the photocatalytic hydrodefluorination reaction

The reaction procedure is the same as **General procedure B**, but if the reaction did not go for completion in 24 h, an additional 3 equiv. of *N,N*-diisopropylethylamine were added to the reaction. Then the reaction was redegassed and returned to the light bath. In some cases total 20-

25 equiv of *N,N*-diisopropylethylamine were used. After the complete consumption of starting material the reaction was treated to the same workup described for **General procedure B**.

#### **General procedure D for the photocatalytic C-F alkylation followed hydrodefluorination reaction**

The reaction procedure is the same as **General procedure B**, but after the complete consumption of starting material, the volatiles, **including excess alkene**, were removed via rotavap. Then the residue was redissolved in CH<sub>3</sub>CN (1 mL). This solution was transferred to an NMR tube containing *N,N*-diisopropylethylamine (0.3 mmol, 3 equiv), a sealed glass (C<sub>6</sub>D<sub>6</sub>) capillary and was capped with NMR septum, and degassed and resubjected to reaction conditions and workup as described above.

#### **General procedure E for the photocatalytic hydrodefluorination reaction (higher catalyst loading)**

The reaction procedure is the same as **General procedure B**, except that the solution of photocatalyst was twice the concentration, *tris*(2-phenylpyridinato-C<sup>2</sup>, *N*) Iridium(III) (Ir(ppy)<sub>3</sub>) (**0.5 mM**, 1 mL in MeCN). The reaction setup and workup followed that described above. The reaction was monitored periodically by <sup>19</sup>F NMR. If the reaction did not go for completion in 24 h, an additional 3 equiv of *N,N*-diisopropylethylamine was added, degassed and reaction continued. Eventually, a total of 20-25 equiv of *N,N*-diisopropylethylamine was used. If after the addition of amine the reaction did not resume (<sup>19</sup>F NMR) additional catalyst (0.7 or 0.8 mol%) was added and the solution again degassed. After the complete consumption of starting material, the reaction was worked up as previously described.

#### **Synthesis of S-1a (4-cyclohexyl-2,3,5,6-tetrafluoropyridine)**

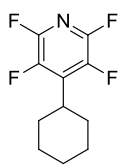

The **General procedure B** was followed using pentafluoropyridine (88 μL, 0.8 mmol, 1 equiv), cyclohexene (483 μL, 4.8 mmol, 6 equiv *N,N*-diisopropylethylamine (167 μL, 0.96 mmol, 1.2 equiv) and 8.0 mL of stock solution of Ir(ppy)<sub>3</sub> (1.3 mg, 0.002 mmol, 0.0025 equiv) in CH<sub>3</sub>CN was used. The crude material was purified by flash chromatography using hexane : ethyl acetate (0% EtOAc for 8 cv and ramped to 100% EtOAc for 8-14 cv and then held at 100% EtOAc 14-18 cv), on a 24 g silica column to afford **S-1a** in 79% yield (147 mg, 0.6 mmol) as a white solid. <sup>19</sup>F NMR (376 MHz, Chloroform-*d*) δ -91.96 – -92.26 (m, 2F), -144.16 – -144.42 (m, 2F). <sup>1</sup>H NMR (400 MHz, Chloroform-*d*) δ 3.09 (tt, *J* = 10.7, 5.4 Hz, 1H), 1.97 – 1.72 (m, 7H), 1.50 – 1.24 (m, 3H). <sup>13</sup>C{<sup>1</sup>H} NMR (101 MHz, Chloroform-*d*) δ 143.6 (dddd, *J* = 244.4, 17.6, 13.1, 2.4 Hz), 141.9 – 138.8 (m), 139.2–138.9 (m), 36.3, 30.1, 26.3, 25.4. FT-IR cm<sup>-1</sup> 2941, 2864, 1639, 1446, 1403. GC/MS (*m/z*, relative intensity) 233 (M<sup>+</sup>, 15), 177 (30), 41 (100). HRMS (ESI) Calcd. for C<sub>11</sub>H<sub>11</sub>F<sub>4</sub>N [M+H]<sup>+</sup> 234.0906, found 234.4539. Melting point 62-65 °C.



### Synthesis of S-2a (4-cyclohexyl-2,3,5,6-tetrafluorobenzonitrile)

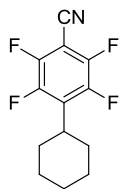

The **General procedure B** was followed using pentafluorobenzonitrile (36  $\mu\text{L}$ , 0.3 mmol, 1 equiv), cyclohexene (182  $\mu\text{L}$ , 1.8 mmol, 6 equiv), *N,N*-diisopropylethylamine (63  $\mu\text{L}$ , 0.36 mmol, 1.2 equiv) and 3.0 mL of stock solution of  $\text{Ir}(\text{ppy})_3$  (0.5 mg, 0.0008 mmol, 0.0025 equiv) in  $\text{CH}_3\text{CN}$  was used. The crude material was purified by flash chromatography using hexane : ethyl acetate (0-15% EtOAc for 25 cv and ramped to 100% EtOAc for 25-26 cv and then held at 100% EtOAc 26-30 cv), on a 12 g silica column to afford **S-2a** in 64% yield (50 mg, 0.19 mmol) as a colorless liquid.  $^{19}\text{F}$  NMR (376 MHz, Chloroform-*d*)  $\delta$  -133.14 – -133.30 (m, 2F), -139.57 (td,  $J = 16.2, 7.1$  Hz, 2F).  $^1\text{H}$  NMR (400 MHz, Chloroform-*d*)  $\delta$  3.09 (tt,  $J = 11.4, 4.4$  Hz, 1H), 1.92 – 1.72 (m, 7H), 1.46 – 1.22 (m, 3H).  $^{13}\text{C}\{^1\text{H}\}$  NMR (101 MHz, Chloroform-*d*)  $\delta$  148.7-145.5 (ddt,  $J = 261.2, 17.8, 3.8$  Hz), 146.4-143.4 (dddd,  $J = 248.6, 12.4, 7.4, 4.2$  Hz), 132.4 (t,  $J = 16.2$  Hz), 107.7 (t,  $J = 3.8$  Hz), 91.9 – 91.3 (m), 36.3, 30.3, 26.4, 25.4. FT-IR  $\text{cm}^{-1}$  2939, 2864, 2242, 1655, 1452, 1398. GC/MS (*m/z*, relative intensity) 257 ( $\text{M}^+$ , 52), 201 (80), 56 (100), 41 (100). HRMS (ESI) Calcd. for  $\text{C}_{13}\text{H}_{11}\text{F}_4\text{N}$  [ $\text{M} + \text{Na}$ ] $^+$  280.0725, found 280.1230.

### Synthesis of S-3a (*S*-(4-cyclohexyl-2,3,5,6-tetrafluorophenyl) *O*-ethyl carbonothioate)

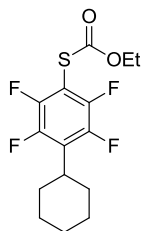

The **General procedure B** was followed using *O*-ethyl *S*-(perfluorophenyl) carbonothioate (27 mg, 0.10 mmol, 1 equiv), cyclohexene (60  $\mu\text{L}$ , 0.6 mmol, 6 equiv), *N,N*-diisopropylethylamine (21  $\mu\text{L}$ , 0.12 mmol, 1.2 equiv) and 1.0 mL of stock solution of  $\text{Ir}(\text{ppy})_3$  (0.16 mg, 0.00025 mmol, 0.0025 equiv) in  $\text{CH}_3\text{CN}$  was used. The crude material was purified by flash chromatography using hexane : ethyl acetate (0-2% EtOAc for 20 cv and ramped to 100 % then held at 100% EtOAc 20-30 cv), on a 24 g silica column. After that, prep tlc was run in hexane: 10% DCM to afford **S-3a** in 62% yield (21 mg, 0.06 mmol) as a colorless liquid.  $^{19}\text{F}$  NMR (376 MHz, Chloroform-*d*)  $\delta$  -132.89 – -133.09 (m, 2F), -141.69 – -141.85 (m, 2F).  $^1\text{H}$  NMR (400 MHz, Chloroform-*d*)  $\delta$  4.34 (q,  $J = 7.1$  Hz, 2H), 3.06 (td,  $J = 11.2, 5.4$  Hz, 1H), 1.96 – 1.70 (m, 7H), 1.47 – 1.37 (m, 3H), 1.34 (t,  $J = 7.1$  Hz, 3H).  $^{13}\text{C}\{^1\text{H}\}$  NMR (101 MHz, Chloroform-*d*)  $\delta$  165.5, 148.4-145.5 (ddt,  $J = 249.0, 15.8, 3.5$  Hz), 146.4-143.5 (dddd,  $J = 247.3, 14.7, 7.8, 4.2$  Hz), 128.3 (t,  $J = 16.5$  Hz), 104.5 (t,  $J = 20.7$  Hz), 65.3, 36.0, 30.6, 26.6, 25.6, 14.2. FT-IR  $\text{cm}^{-1}$  2990, 2931, 1746, 1473, 1454. GC/MS (*m/z*, relative intensity) 336 ( $\text{M}^+$ , 5), 264 (65), 208 (90), 41 (100). HRMS (ESI) Calcd. for  $\text{C}_{15}\text{H}_{16}\text{F}_4\text{O}_2\text{S}$  [ $\text{M} + \text{H}$ ] $^+$  337.0885, found 337.1615.

Note: The isolated compound appears pure by GC-MS and  $^1\text{H}$  NMR. However,  $^{19}\text{F}$  NMR contains some unidentified, inseparable peaks in 3 %, and 9% minor rr respectively.

### Synthesis of S-4a (methyl 4-cyclohexyl-2,3,5,6-tetrafluorobenzoate)

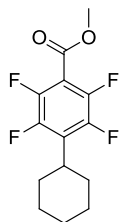

The **General procedure B** was followed using methyl 2,3,4,5,6-pentafluorobenzoate (23 mg, 0.10 mmol, 1 equiv), cyclohexene (60  $\mu$ L, 0.6 mmol, 6 equiv), *N,N*-diisopropylethylamine (21  $\mu$ L, 0.12 mmol, 1.2 equiv) and 1.0 mL of stock solution of Ir(ppy)<sub>3</sub> (0.16 mg, 0.00025 mmol, 0.0025 equiv) in CH<sub>3</sub>CN was used. The crude material was purified by flash chromatography using hexane : ethyl acetate (0-2% EtOAc for 15 cv and ramped to 100% EtOAc held at 100% EtOAc for 15-25 cv), on a 4 g silica column followed by prep tlc using 95-5 Hexane : EtOAc to afford **S-4a** in 76% yield (22 mg, 0.07 mmol) as a colorless liquid. <sup>19</sup>F NMR (376 MHz, Chloroform-*d*)  $\delta$  -140.24 – -140.40 (m, 2F), -142.11 (td, *J* = 14.7, 4.2 Hz, 2F). <sup>1</sup>H NMR (400 MHz, Chloroform-*d*)  $\delta$  3.96 (s, 3H), 3.05 (tt, *J* = 11.6, 4.0 Hz, 1H), 1.94 – 1.70 (m, 7H), 1.34 (tt, *J* = 24.7, 12.3 Hz, 3H). <sup>13</sup>C{<sup>1</sup>H} NMR (101 MHz, Chloroform-*d*)  $\delta$  160.5 (dd, *J* = 3.6, 1.9 Hz), 146.4 – 145.8 (m), 144.0 – 143.2 (m), 128.6 (t, *J* = 16.4 Hz), 109.8 (t, *J* = 15.7 Hz), 53.1, 35.9 (t, *J* = 1.7 Hz), 30.6 (t, *J* = 2.1 Hz), 26.6, 25.6. FT-IR cm<sup>-1</sup> 2955, 2890, 1738, 1476, 1446, 1411. GC/MS (*m/z*, relative intensity) 290 (M<sup>+</sup>, 30), 234 (50), 203 (60), 41 (100). HRMS (ESI) Calcd. for C<sub>14</sub>H<sub>14</sub>F<sub>4</sub>O<sub>2</sub> [M + H]<sup>+</sup> 291.1008, found 291.1559.

#### Synthesis of **S-5a** (2-(4-cyclohexyl-2,3,5,6-tetrafluorophenyl)benzo[d]oxazole)

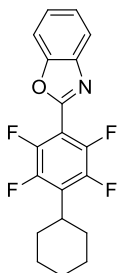

The **General procedure B** was followed using 2-(perfluorophenyl)benzo[d]oxazole (57 mg, 0.20 mmol, 1 equiv), cyclohexene (121  $\mu$ L, 1.2 mmol, 6 equiv), *N,N*-diisopropylethylamine (42  $\mu$ L, 0.24 mmol, 1.2 equiv) and 2.0 mL of stock solution of Ir(ppy)<sub>3</sub> (0.3 mg, 0.0005 mmol, 0.0025 equiv) in CH<sub>3</sub>CN was used. The crude material was purified by flash chromatography using hexane : ethyl acetate (0-3% EtOAc for 13 cv and ramped to 100% EtOAc and then held at 100% EtOAc for 15-30 cv) on a 12 g silica column followed by reverse phase chromatography using MeCN : MeOH (0-0.2% MeOH for 4 cv and then ramped to 100% MeOH and then held at 100% MeOH for 4-30 cv), on a 26 g C18 reverse column to afford **S-5a** in 49% yield (34 mg, 0.09 mmol) as a white solid. <sup>19</sup>F NMR (376 MHz, Chloroform-*d*)  $\delta$  -138.80 – -138.98 (m, 2F), -141.95 (td, *J* = 14.9, 5.2 Hz, 2F). <sup>1</sup>H NMR (400 MHz, Chloroform-*d*)  $\delta$  7.94 – 7.89 (m, 1H), 7.70 – 7.66 (m, 1H), 7.46 (ddd, *J* = 6.7, 4.3 Hz, 2H), 3.20 – 3.09 (m, 1H), 1.99 – 1.75 (m, 7H), 1.40 (tt, *J* = 15.6, 7.9 Hz, 3H). <sup>13</sup>C{<sup>1</sup>H} NMR (101 MHz, Chloroform-*d*)  $\delta$  153.6 – 153.5 (m), 150.5, 146.5 (ddt, *J* = 26.4, 17.5, 4.6 Hz), 144.5 – 143.6 (m), 141.2, 128.5 (t, *J* = 16.5 Hz), 126.2, 125.0, 120.8, 111.0, 36.0 (d, *J* = 1.8 Hz), 30.7 (t, *J* = 2.2 Hz), 26.6, 25.6. FT-IR cm<sup>-1</sup> 3022, 2939, 2856, 1612, 1543, 1486, 1449. GC/MS (*m/z*, relative intensity) 349 (M<sup>+</sup>, 100), 293 (100), 63 (70), 41 (60). HRMS (ESI) Calcd. for C<sub>19</sub>H<sub>15</sub>F<sub>4</sub>NO [M + H]<sup>+</sup> 350.1168, found 350.1154. Melting point 144-148 °C

#### Synthesis of **S-6a** ((4-cyclohexyl-2,3,5,6-tetrafluorophenyl)diphenylphosphine)

The **General procedure B** was followed using (perfluorophenyl)diphenylphosphane (35 mg, 0.10 mmol, 1 equiv), cyclohexene (60  $\mu$ L, 0.6 mmol, 6 equiv), *N,N*-diisopropylethylamine (21  $\mu$ L, 0.12

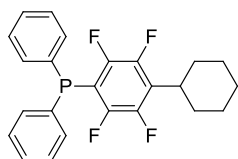

mmol, 1.2 equiv) and 1.0 mL of stock solution of Ir(ppy)<sub>3</sub> (0.16 mg, 0.00025 mmol, 0.0025 equiv) in CH<sub>3</sub>CN was used. The crude material was purified by flash chromatography using hexane : ethyl acetate (0% EtOAc for 10 cv, ramped to 100% EtOAc and then held at 100% EtOAc for 10-22 cv), on a 12 g silica column followed by prep tlc in hexane to afford **S-6a** in 55% yield (23 mg, 0.06 mmol) as a white solid. <sup>19</sup>F NMR (376 MHz, Chloroform-*d*) δ -129.26 – -129.51 (m, 2F), -142.24 (q, *J* = 12.5, 12.0 Hz, 2F). <sup>1</sup>H NMR (400 MHz, Chloroform-*d*) δ 7.44 (dt, *J* = 7.7, 3.7 Hz, 4H), 7.37 (d, *J* = 4.2 Hz, 6H), 3.04 (tt, *J* = 10.8, 4.4 Hz, 1H), 1.82 (dd, *J* = 23.9, 9.9 Hz, 7H), 1.34 (tt, *J* = 16.5, 7.8 Hz, 3H). <sup>13</sup>C{<sup>1</sup>H} NMR (101 MHz, Chloroform-*d*) δ 149.9 – 146.5 (m), 146.6 – 143.5 (m), 134.1, 134.0, 133.1, 132.9, 129.1, 128.6, 128.5, 127.6 (t, *J* = 16.5 Hz), 112.9 (dd, *J* = 35.4, 21.2 Hz), 35.9, 30.7, 26.7, 25.7. FT-IR cm<sup>-1</sup> 2949, 2853, 1446. GC/MS (m/z, relative intensity) 416 (M<sup>+</sup>, 100), 183 (20), 108 (20). HRMS (ESI) Calcd. for C<sub>24</sub>H<sub>21</sub>F<sub>4</sub>P [M + H]<sup>+</sup> 417.1395, found 417.2508. Melting point 78-80 °C.

### Synthesis of **S-7a** (2,3,5,6-tetrafluoro-4-hexylpyridine)

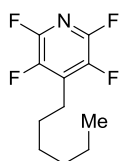

The **General procedure B** was followed using pentafluoropyridine (11 μL, 0.10 mmol, 1 equiv), hexene (75 μL, 0.6 mmol, 6 equiv), *N,N*-diisopropylethylamine (21 μL, 0.12 mmol, 1.2 equiv) and 1.0 mL of stock solution of Ir(ppy)<sub>3</sub> (0.16 mg, 0.00025 mmol, 0.0025 equiv) in CH<sub>3</sub>CN was used. The crude material was purified by flash chromatography using hexane : ethyl acetate (0-5% EtOAc for 18 cv, ramped to 100% EtOAc then held at 100% EtOAc for 18-40 cv), on a 12 g silica column to afford **S-7a** in 67% yield (16 mg, 0.07 mmol) as a colorless liquid. <sup>19</sup>F NMR (376 MHz, Chloroform-*d*) δ -91.94 – -92.18 (m, 2F), -145.61 – -145.85 (m, 2F). <sup>1</sup>H NMR (400 MHz, Chloroform-*d*) δ 2.83 (t, *J* = 7.7 Hz, 2H), 1.66 (p, *J* = 7.4 Hz, 2H), 1.46 – 1.30 (m, 6H), 0.96 – 0.87 (m, 3H). <sup>13</sup>C{<sup>1</sup>H} NMR (101 MHz, Chloroform-*d*) δ 144.7 – 141.5 (m), 141.9 – 138.9 (m), 135.5 (tt, *J* = 17.2, 2.6 Hz), 31.3, 28.8, 28.5, 23.7, 22.4, 14.0. FT-IR cm<sup>-1</sup> 2960, 2931, 1653, 1490. GC/MS (m/z, relative intensity) 235 (M<sup>+</sup>, 10), 165 (15), 147 (20), 43 (100). HRMS (ESI) Calcd. for C<sub>11</sub>H<sub>13</sub>F<sub>4</sub>N [M + Na]<sup>+</sup> 258.0882, found 258.0888.

### Synthesis of **S-8a** (2,3,5,6-tetrafluoro-4-(tetrahydro-2H-pyran-2-yl)pyridine)

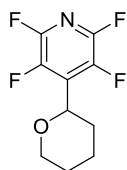

The **General procedure B** was followed using pentafluoropyridine (22 μL, 0.20 mmol, 1 equiv), dihydropyran (108 μL, 1.2 mmol, 6 equiv), *N,N*-diisopropylethylamine (42 μL, 0.24 mmol, 1.2 equiv) and 2.0 mL of stock solution of Ir(ppy)<sub>3</sub> (0.3 mg, 0.0005 mmol, 0.0025 equiv) in CH<sub>3</sub>CN was used. The crude material was purified by flash chromatography using hexane : EtOAc (0-30% EtOAc for 18 cv, ramped to 100% EtOAc and then held at 100% EtOAc for 30-35 cv), on a 12 g silica column to afford **S-8a** in 72% yield (34 mg, 0.15 mmol, 1:1 rr, NMR yield 75% with trifluoroacetic acid as an internal reference) as a colorless liquid.

Due to volatility of compound 8a we did not attempt hard to remove residual solvent hexane.

HRMS (ESI) Calcd. for C<sub>10</sub>H<sub>9</sub>F<sub>4</sub>NO [M + K]<sup>+</sup> 274.0257, found 274.2516.

### (2,3,5,6-tetrafluoro-4-(tetrahydro-2H-pyran-2-yl)pyridine)

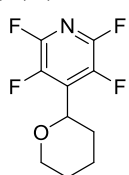

<sup>19</sup>F NMR (376 MHz, Chloroform-*d*) δ -91.17 – -91.58 (m, 2F), -143.53 – -143.85 (m, 2F). <sup>1</sup>H NMR (400 MHz, Chloroform-*d*) δ 4.81 (dd, *J* = 11.4, 2.3 Hz, 1H), 4.13 (ddd, *J* = 11.6, 3.9, 1.9 Hz, 1H), 3.58 (td, *J* = 11.7, 2.2 Hz, 1H), 2.09 – 1.94 (m, 2H), 1.87 – 1.55 (m, 4H). <sup>13</sup>C{<sup>1</sup>H} NMR (101 MHz, Chloroform-*d*) δ 144.9 – 142.4 (m), 141.4 – 138.5 (m), 134.5 – 133.8 (m), 72.2 (t, *J* = 2.2 Hz), 69.5, 30.2 (d, *J* = 1.7 Hz), 25.4, 23.6. FT-IR cm<sup>-1</sup> 2917, 2856, 1709, 1642, 1468. GC/MS (*m/z*, relative intensity) 235 (M<sup>+</sup>, 5), 56 (50), 41 (100).

### Regioisomer of **S-8a** 2,3,5,6-tetrafluoro-4-(tetrahydro-2H-pyran-3-yl)pyridine

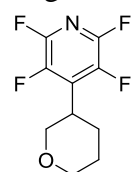

<sup>19</sup>F NMR (376 MHz, Chloroform-*d*) δ -91.32 – -91.69 (m, 2F), -143.14 – -143.46 (m, 2F). <sup>1</sup>H NMR (400 MHz, Chloroform-*d*) δ 4.11 – 4.00 (m, 1H), 3.93 (ddd, *J* = 11.1, 4.2, 2.0 Hz, 1H), 3.78 (tt, *J* = 11.0, 2.3 Hz, 1H), 3.48 (dtd, *J* = 20.2, 11.6, 3.5 Hz, 2H), 2.15 – 1.94 (m, 2H), 1.93 – 1.64 (m, 2H).

### Synthesis of **S-9a** (3-(perfluoropyridin-4-yl)cyclohexanone)

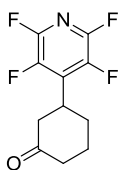

The **General procedure B** was followed using pentafluoropyridine (16 μL, 0.15 mmol, 1 equiv), 2-cyclohexen-1-one (87 μL, 0.9 mmol, 6 equiv), *N,N*-diisopropylethylamine (31 μL, 0.18 mmol, 1.2 equiv) and 1.5 mL of stock solution of Ir(ppy)<sub>3</sub> (0.2 mg, 0.0004 mmol, 0.0025 equiv) in CH<sub>3</sub>CN was used. The crude material was purified by flash chromatography using hexane : ethyl acetate (0-3% EtOAc for 30 cv, ramped to 100% EtOAc and then held at 100% EtOAc for 30-35 cv), on a 12 g silica column to afford **S-9a** in 54% yield (20 mg, 0.08 mmol) as a colorless liquid. <sup>19</sup>F NMR (376 MHz, Chloroform-*d*) δ -90.28 – -90.50 (m, 2F), -143.84 – -144.07 (m, 2F). <sup>1</sup>H NMR (400 MHz, Chloroform-*d*) δ 3.56 (tt, *J* = 12.8, 3.9 Hz, 1H), 2.88 (t, *J* = 13.8 Hz, 1H), 2.61 – 2.41 (m, 3H), 2.31 – 2.18 (m, 2H), 2.10 – 2.00 (m, 1H), 1.92 – 1.76 (m, 1H). <sup>13</sup>C{<sup>1</sup>H} NMR (101 MHz, Chloroform-*d*) δ 207.4, 143.7 (dddd, *J* = 245.9, 17.3, 13.0, 2.8 Hz), 141.9 – 138.7 (m), 135.3 (tt, *J* = 14.1, 2.1 Hz), 44.3 (t, *J* = 1.8 Hz), 40.8, 35.5 (t, *J* = 1.9 Hz), 28.8 (t, *J* = 1.8 Hz), 25.3. FT-IR cm<sup>-1</sup> 2965, 2869, 1714, 1650, 1486, 1452, 1425. GC/MS (*m/z*, relative intensity) 247 (M<sup>+</sup>, 30), 200 (90), 177 (50), 55(100), 41 (80). HRMS (ESI) Calcd. for C<sub>11</sub>H<sub>9</sub>F<sub>4</sub>NO [M + Na]<sup>+</sup> 270.0518, found 270.1384.

### Synthesis of **S-10a** (3-methyl-2-(perfluoropyridin-4-yl)butan-1-ol)

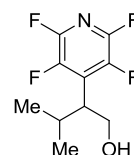

The **General procedure B** was followed using pentafluoropyridine (22 μL, 0.2 mmol, 1 equiv), 3-methylbut-2-en-1-ol (120 μL, 1.2 mmol, 6 equiv), *N,N*-diisopropylethylamine (42 μL, 0.24 mmol, 1.2 equiv) and 2.0 mL of stock solution of Ir(ppy)<sub>3</sub> (0.3 mg, 0.0005 mmol, 0.0025 equiv) in CH<sub>3</sub>CN was used. The crude

material was purified by flash chromatography using hexane : ethyl acetate (0-15 % EtOAc for 15 cv, ramped to 100 % EtOAc and then held at 100% EtOAc for 15-25 cv), on a 12 g silica column to afford **S-10a** in 43% yield (20 mg, 0.08 mmol) as a colorless liquid.  $^{19}\text{F}$  NMR (376 MHz, Chloroform-*d*)  $\delta$  -91.79 – -92.13 (m, 2F), -142.83 – -143.09 (m, 2F).  $^1\text{H}$  NMR (400 MHz, Chloroform-*d*)  $\delta$  4.03 (dd,  $J$  = 10.5, 5.5 Hz, 1H), 3.94 (t,  $J$  = 10.1 Hz, 1H), 3.12 (td,  $J$  = 9.6, 5.6 Hz, 1H), 2.09 (dt,  $J$  = 9.1, 6.8 Hz, 1H), 1.40 (s, 1H), 1.01 (d,  $J$  = 6.6 Hz, 3H), 0.76 (d,  $J$  = 6.7 Hz, 3H).  $^{13}\text{C}\{^1\text{H}\}$  NMR (101 MHz, Chloroform-*d*)  $\delta$  145.6 – 142.6 (m), 142.7 – 139.9 (m), 136.1 (ddt,  $J$  = 16.8, 15.0, 1.9 Hz), 62.9 (t,  $J$  = 2.5 Hz), 48.2 – 48.1 (m), 28.9 (t,  $J$  = 1.9 Hz), 21.37, 21.35. FT-IR  $\text{cm}^{-1}$  3544-3174, 2971, 1650, 1457. GC/MS (*m/z*, relative intensity) 237 ( $\text{M}^+$ , 10), 205 (40), 192 (35), 177 (55), 41 (100). HRMS (ESI) Calcd. for  $\text{C}_{10}\text{H}_{11}\text{F}_4\text{NO}$  [ $\text{M} + \text{K}$ ] $^+$  276.0414, found 276.1589.

Note: Isolated product contains 10% of an inseparable (alkenylated) product.

### Synthesis of **S-11a** (6-(perfluoropyridin-4-yl)hexan-1-ol)

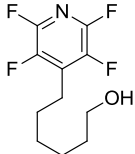 The **General procedure B** was followed using pentafluoropyridine (44  $\mu\text{L}$ , 0.40 mmol, 1 equiv), 5-hexen-1-ol (285  $\mu\text{L}$ , 2.4 mmol, 6 equiv), *N,N*-diisopropylethylamine (84  $\mu\text{L}$ , 0.48 mmol, 1.2 equiv) and 4.0 mL of stock solution of  $\text{Ir}(\text{ppy})_3$  (0.66 mg, 0.001 mmol, 0.0025 equiv) in  $\text{CH}_3\text{CN}$  was used. The crude material was purified by flash chromatography using hexane : ethyl acetate (0-22% EtOAc for 35 cv, ramped to 100% EtOAc and then held at 100% EtOAc for 35-42 cv) on a 24 g silica column to afford **S-11a** in 53% yield (53 mg, 0.21 mmol) as a colorless liquid.  $^{19}\text{F}$  NMR (376 MHz, Chloroform-*d*)  $\delta$  -91.73 – -92.02 (m, 2F), -145.49 – -145.78 (m, 2F).  $^1\text{H}$  NMR (400 MHz, Chloroform-*d*)  $\delta$  3.58 (t,  $J$  = 6.5 Hz, 2H), 2.75 (t,  $J$  = 7.7 Hz, 2H), 1.59 (t,  $J$  = 7.4 Hz, 2H), 1.50 (td,  $J$  = 9.7, 8.3, 4.9 Hz, 2H), 1.34 (dq,  $J$  = 9.7, 6.2, 5.0 Hz, 4H).  $^{13}\text{C}\{^1\text{H}\}$  NMR (101 MHz, Chloroform-*d*)  $\delta$  144.7 – 141.7 (m), 141.9 – 138.9 (m), 135.3 (tt,  $J$  = 17.0, 2.5 Hz), 62.8, 32.5, 28.9, 28.5, 25.3, 23.6. FT-IR  $\text{cm}^{-1}$  3536-3153, 2939, 2861, 1647, 1490. GC/MS (*m/z*, relative intensity) 251 ( $\text{M}^+$ , 5), 165 (30), 69 (65), 41 (100). HRMS (ESI) Calcd. for  $\text{C}_{11}\text{H}_{13}\text{F}_4\text{NO}$  [ $\text{M} + \text{H}$ ] $^+$  252.1012, found 252.1279.

### Synthesis of **S-12a** (3-methyl-2-(perfluoropyridin-3-yl)butan-1-ol)

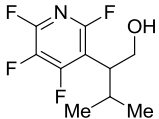 The **General procedure B** was followed using 3-chloro-2,4,5,6-tetrafluoropyridine (12  $\mu\text{L}$ , 0.10 mmol, 1 equiv), 3-methylbut-2-en-1-ol (60  $\mu\text{L}$ , 0.6 mmol, 6 equiv), *N,N*-diisopropylethylamine (21  $\mu\text{L}$ , 0.12 mmol, 1.2 equiv) and 1.0 mL of stock solution of  $\text{Ir}(\text{ppy})_3$  (0.16 mg, 0.00025 mmol, 0.0025 equiv) in  $\text{CH}_3\text{CN}$  was used. The crude material was purified by flash chromatography using hexane : ethyl acetate (0-22% EtOAc for 30 cv, ramped to 100% EtOAc and then held at 100% EtOAc for 30-35 cv), on a 4 g silica column to afford **S-12a** in 58% yield (14 mg, 0.06 mmol) as a colorless liquid.  $^{19}\text{F}$  NMR (376 MHz, Chloroform-*d*)  $\delta$  -69.57 (s, 1F), -87.70 (dd,  $J$  = 24, 36 Hz, 1F), -115.48 (dd,  $J$  = 16.0, 36.0 Hz, 1F),

-167.17 (dt,  $J = 23.7, 20.5$  Hz, 1F).  $^1\text{H}$  NMR (400 MHz, Chloroform- $d$ )  $\delta$  4.04 (dd,  $J = 10.5, 5.6$  Hz, 1H), 3.92 (t,  $J = 10.1$  Hz, 1H), 2.96 (td,  $J = 9.5, 5.6$  Hz, 1H), 2.21 – 2.02 (m, 1H), 1.53 (s, 1H), 1.05 (d,  $J = 6.6$  Hz, 3H), 0.81 (d,  $J = 6.7$  Hz, 3H).  $^{13}\text{C}\{^1\text{H}\}$  NMR (101 MHz, Chloroform- $d$ )  $\delta$  160.6 – 157.4 (m), 153.4 (dddd,  $J = 242.0, 15.1, 12.6, 3.5$  Hz), 149.2 – 146.3 (m), 132.8 (dddd,  $J = 259.1, 28.5, 16.2, 8.2$  Hz), 111.9 (dddd,  $J = 34.6, 15.5, 7.3, 3.2$  Hz), 62.6 (t,  $J = 2.5$  Hz), 46.0 (d,  $J = 4.0$  Hz), 28.4, 21.2, 21.1. FT-IR  $\text{cm}^{-1}$  3547-3156, 2971, 2880, 1628, 1484, 1462, 1393. GC/MS (m/z, relative intensity) 237 ( $\text{M}^+$ , 5), 177 (50), 192 (35), 164 (50), 43 (100). HRMS (ESI) Calcd. for  $\text{C}_{10}\text{H}_{11}\text{F}_4\text{NO}$  [ $\text{M} + \text{K}$ ] $^+$  276.0414, found 276.0796.

Note: Isolated compound contains 6% of an inseparable alkenylated product.

### Synthesis of S-13a (4-(6-chlorohexyl)-2,3,5,6-tetrafluoropyridine)

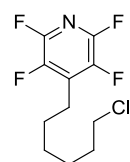

The **General procedure B** was followed using pentafluoropyridine (22  $\mu\text{L}$ , 0.20 mmol, 1 equiv), 6-chloro-1-hexene (158  $\mu\text{L}$ , 1.2 mmol, 6 equiv), *N,N*-diisopropylethylamine (42  $\mu\text{L}$ , 0.24 mmol, 1.2 equiv) and 2.0 mL of stock solution of  $\text{Ir}(\text{ppy})_3$  (0.3 mg, 0.0005 mmol, 0.0025 equiv) in  $\text{CH}_3\text{CN}$  was used. The crude material was purified by flash chromatography using hexane : ethyl acetate (0% EtOAc for 15 cv, ramped to 100% EtOAc and then held at 100% EtOAc for 15-25 cv), on a 4 g silica column to afford **S-13a** in 76% yield (41 mg, 0.15 mmol) as a colorless liquid.  $^{19}\text{F}$  NMR (376 MHz, Chloroform- $d$ )  $\delta$  -91.67 – -91.94 (m, 2F), -145.52 – -145.76 (m, 2F).  $^1\text{H}$  NMR (400 MHz, Chloroform- $d$ )  $\delta$  3.54 (t,  $J = 6.6$  Hz, 2H), 2.82 (t,  $J = 7.7$  Hz, 2H), 1.78 (p,  $J = 6.7$  Hz, 2H), 1.67 (p,  $J = 7.6$  Hz, 2H), 1.50 (dt,  $J = 14.2, 6.9$  Hz, 2H), 1.41 (q,  $J = 7.4$  Hz, 2H).  $^{13}\text{C}\{^1\text{H}\}$  NMR (101 MHz, Chloroform- $d$ )  $\delta$  144.8 – 141.9 (m), 142.0 – 138.9 (m), 135.1 (tt,  $J = 17.2, 2.6$  Hz), 44.9, 32.3, 28.4, 28.3, 26.4, 23.6. FT-IR  $\text{cm}^{-1}$  2949, 2872, 1650, 1462, 1414. GC/MS (m/z, relative intensity) 269 ( $\text{M}^+$ , 10), 147 (30), 69 (65), 41 (100). HRMS (ESI) Calcd. for  $\text{C}_{11}\text{H}_{12}\text{ClF}_4\text{N}$  [ $\text{M} + \text{H}$ ] $^+$  270.0673, found 270.1385.

### Synthesis of S-14a 3-methyl-2-(perfluorophenyl)butan-1-ol

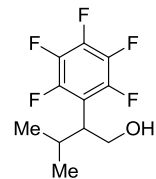

The **General procedure B** was followed using hexafluorobenzene (41  $\mu\text{L}$ , 0.35 mmol, 1 eq), 3-methylbut-2-en-1-ol (210  $\mu\text{L}$ , 2.1 mmol, 6 equiv), *N,N*-diisopropylethylamine (73  $\mu\text{L}$ , 0.42 mmol, 1.2 eq) and 3.5 mL of stock solution of  $\text{Ir}(\text{ppy})_3$  (0.57 mg, 0.0009 mmol, 0.0025 equiv) in  $\text{CH}_3\text{CN}$  was used. The crude material was purified by flash chromatography using hexane : ether (0-30% ether for 40 cv, ramped to 100% ether and then held at 100% ether for 40-60 cv), on a 24 g silica column to afford **S-14a** in 62% yield (55 mg, 0.22 mmol) as a colorless liquid.  $^{19}\text{F}$  NMR (376 MHz, Chloroform- $d$ )  $\delta$  -141.29 (dd,  $J = 23.1, 7.9$  Hz, 2F), -157.02 (t,  $J = 20.9$  Hz, 1F), -162.53 – -162.83 (m, 2F).  $^1\text{H}$  NMR (400 MHz, Chloroform- $d$ )  $\delta$  4.05 (dd,  $J = 10.6, 5.6$  Hz, 1H), 3.93 (tt,  $J = 10.4, 1.5$  Hz, 1H), 3.05 (td,  $J = 9.5, 5.5$  Hz, 1H), 2.09 (ttd,  $J = 9.2, 6.7, 4.4$  Hz, 1H), 1.05 (d,  $J = 6.6$  Hz, 3H), 0.79 (d,

$J = 6.7$  Hz, 3H).  $^{13}\text{C}\{^1\text{H}\}$  NMR (101 MHz, Chloroform-*d*)  $\delta$  145.63 (dddd,  $J = 245.4, 14.4, 10.0, 4.0$  Hz), 141.3 – 138.1 (m), 137.49 (dddd,  $J = 256.6, 17.7, 12.2, 5.1$  Hz), 115.7 – 115.1 (m), 63.0 (t,  $J = 2.5$  Hz), 46.6 (d,  $J = 1.9$  Hz), 28.6 (t,  $J = 1.9$  Hz), 21.3, 21.2. FT-IR  $\text{cm}^{-1}$  3564-3132, 2970, 1530, 1497. GC/MS ( $m/z$ , relative intensity) 254 ( $\text{M}^+$ , 5), 194 (80), 181 (75), 43 (100). HRMS (ESI) Calcd. for  $\text{C}_{11}\text{H}_{11}\text{F}_5\text{O}$  [ $\text{M} + \text{H}$ ] $^+$  255.0808, found 255.1203.

Note: Isolated compound contains 6% of an inseparable alkenylated product.

### Synthesis of S-15a 4-exo-(bicyclo[2.2.1]heptan-2-yl)-2,3,5,6-tetrafluoropyridine

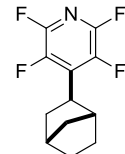 The **General procedure B** was followed using pentafluoropyridine (22  $\mu\text{L}$ , 0.20 mmol, 1 equiv), bicyclo[2.2.1]hept-2-ene (112 mg, 1.2 mmol, 6 equiv), *N,N*-diisopropylethylamine (42  $\mu\text{L}$ , 0.24 mmol, 1.2 equiv) and 2.0 mL of stock solution of  $\text{Ir}(\text{ppy})_3$  (0.3 mg, 0.0005 mmol, 0.0025 equiv) in  $\text{CH}_3\text{CN}$  was used. The crude material was purified by flash chromatography using hexane : ethyl acetate (0% EtOAc for 10 cv, ramped to 100% EtOAc and then held at 100% EtOAc for 10-28 cv) on a 12 g silica column to afford **S-15a** in 61% yield (30 mg, 0.12 mmol, dr 10:1) as a colorless liquid.  $^{19}\text{F}$  NMR (376 MHz, Chloroform-*d*)  $\delta$  -92.25 – -92.60 (m, 2F), -143.01 – -143.25 (m, 2F).  $^1\text{H}$  NMR (400 MHz, Chloroform-*d*)  $\delta$  3.11 – 3.01 (dd,  $J = 9.7, 5.9$  Hz, 1H), 2.61 (dd,  $J = 3.6, 1.9$  Hz, 1H), 2.42 (t,  $J = 3.7$  Hz, 1H), 1.92 (t,  $J = 10.8$  Hz, 1H), 1.75 – 1.61 (m, 4H), 1.41 – 1.30 (m, 3H).  $^{13}\text{C}\{^1\text{H}\}$  NMR (101 MHz, Chloroform-*d*)  $\delta$  143.8 (dddd,  $J = 244.1, 18.1, 13.5, 2.7$  Hz), 141.7 – 138.7 (m), 139.05 (dt,  $J = 11.4, 2.1$  Hz), 41.1 (t,  $J = 2.3$  Hz), 40.3, 38.5 (t,  $J = 2.1$  Hz), 37.5 (t,  $J = 3.5$  Hz), 36.4, 30.9, 28.2. FT-IR  $\text{cm}^{-1}$  2957, 2874, 1647, 1454. GC/MS ( $m/z$ , relative intensity) 245 ( $\text{M}^+$ , 5), 178(20), 66 (100). HRMS (ESI) Calcd. for  $\text{C}_{12}\text{H}_{11}\text{F}_4\text{N}$  [ $\text{M} + \text{K}$ ] $^+$  268.0725, found 268.0412.

Note: The relevant coupling constant of the product matched that of the literature for the exo-isomer.<sup>6</sup> The stereochemistry was assigned based on this coupling constant.

### Synthesis of S-16a dimethyl 5-(perfluoropyridin-4-yl)-exo-7-oxabicyclo[2.2.1]heptane-exo,exo-2,3-dicarboxylate

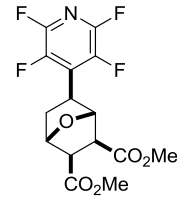 The **General procedure B** was followed using pentafluoropyridine (11  $\mu\text{L}$ , 0.10 mmol, 1 equiv), dimethyl-7-oxabicyclo[2.2.1]hept-5-ene exo,exo-2,3-dicarboxylate (102 mg, 0.48 mmol, **4.8 equiv**), *N,N*-diisopropylethylamine (21  $\mu\text{L}$ , 0.12 mmol, 1.2 equiv) and 1.0 mL of stock solution of  $\text{Ir}(\text{ppy})_3$  (0.16 mg, 0.00025 mmol, 0.0025 equiv) in  $\text{CH}_3\text{CN}$  was used. The crude material was purified by flash chromatography using hexane : ethyl acetate (0-12% EtOAc for 18 cv, ramped to 100% EtOAc and then held at 100% EtOAc for 18-28 cv), on a 4 g silica column to afford **S-16a** in 42% yield (15 mg, 0.04 mmol) as a colorless liquid.  $^{19}\text{F}$  NMR (376 MHz, Chloroform-*d*)  $\delta$  -90.58 – -90.88 (m), -142.32 – -142.55 (m).  $^1\text{H}$  NMR (400 MHz, Chloroform-*d*)  $\delta$  5.13 (d,  $J = 5.5$  Hz, 1H), 3.71 (s, 3H), 3.70 (s, 3H), 3.42 (dd,  $J = 9.0, 5.6$  Hz, 1H), 3.21-3.10 (m, 1H), 2.29 – 2.00 (m, 1H).  $^{13}\text{C}\{^1\text{H}\}$  NMR (151 MHz, Chloroform-*d*)  $\delta$  170.8, 170.3, 145.0 – 142.7 (m), 141.5 – 138.9 (m),

135.0 (t,  $J = 12.7$  Hz), 81.4, 78.7, 52.6, 52.5, 52.5 51.6, 39.6, 37.5. FT-IR  $\text{cm}^{-1}$  2960, 2925, 1722, 1653, 1438, 1377. GC/MS ( $m/z$ , relative intensity) 363 ( $M^+$ , 5), 332 (10), 304 (20), 272 (25), 59 (100). HRMS (ESI) Calcd. for  $\text{C}_{15}\text{H}_{13}\text{F}_4\text{NO}_5$  [ $M + \text{Na}$ ] $^+$  386.0628, found 386.0609.

Note: The relevant coupling constant of the product matched that of the literature for the exo-isomer. The stereochemistry was assigned based on this coupling constant.<sup>7</sup>

### Synthesis of **S-17a** 4-cyclohexyl-2,2',3,3',5,5',6,6'-octafluoro-1,1'-biphenyl

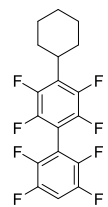

The **General procedure B** was followed using perfluoro-1,1'-biphenyl (33 mg, 0.1 mmol, 1 equiv), cyclohexene (60  $\mu\text{L}$ , 0.6 mmol, 6.0 equiv), *N,N*-diisopropylethylamine (21  $\mu\text{L}$ , 0.12 mmol, 1.2 equiv) and 1.0 mL of stock solution of  $\text{Ir}(\text{ppy})_3$  (0.16 mg, 0.00025 mmol, 0.0025 equiv) in  $\text{CH}_3\text{CN}$  was used. The crude material was purified by prep tlc using hexane to afford **S-17a** in 43% yield (17 mg, 0.04 mmol) as a white solid.  $^{19}\text{F}$  NMR (376 MHz, Chloroform-*d*)  $\delta$  -137.84 – -138.19 (m, 2F), -138.19 – -138.53 (m, 2F), -139.43 – -139.80 (m, 2F), -142.21 – -142.48 (m, 2F).  $^1\text{H}$  NMR (400 MHz, Chloroform-*d*)  $\delta$  7.25 – 7.18 (m, 1H), 3.11 (tt,  $J = 10.9, 5.1$  Hz, 1H), 1.97 – 1.73 (m, 8H), 1.52 – 1.30 (m, 2H).  $^{13}\text{C}\{^1\text{H}\}$  NMR (101 MHz, Chloroform-*d*)  $\delta$  147.5 – 146.0 (m), 145.3 (dt,  $J = 12.0, 4.0$  Hz), 145.0–143.5 (m), 143.2 – 142.5 (m), 127.3 (t,  $J = 16.3$  Hz), 108.3 (ddt,  $J = 20.0, 17.0, 2.4$  Hz), 107.5 (t,  $J = 22.2$  Hz), 105.1 – 103.8 (m), 36.1, 30.8 (t,  $J = 2.2$  Hz), 26.8, 25.8. FT-IR  $\text{cm}^{-1}$  2936, 2858, 1506, 1449, 1240. GC/MS ( $m/z$ , relative intensity) 380 ( $M^+$ , 30), 324 (70), 41(100). HRMS (ESI) Calcd. for  $\text{C}_{18}\text{H}_{12}\text{F}_8$  [ $M + \text{H}$ ] $^+$  381.0890, found 381.1062. Melting point 110-114  $^\circ\text{C}$ .

### Synthesis of **S-18a** (ethyl 3-(2,3,5,6-tetrafluoro-4-(trifluoromethyl)phenyl)butanoate)

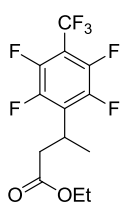

The **General procedure B** was followed using octafluorotoluene (28  $\mu\text{L}$ , 0.20 mmol, 1 equiv), ethyl crotonate (149  $\mu\text{L}$ , 1.2 mmol, 6 equiv), *N,N*-diisopropylethylamine (42  $\mu\text{L}$ , 0.24 mmol, 1.2 equiv) and 2.0 mL of stock solution of  $\text{Ir}(\text{ppy})_3$  (0.3 mg, 0.0005 mmol, 0.0025 equiv) in  $\text{CH}_3\text{CN}$  was used. The crude material was purified by flash chromatography using hexane : ethyl acetate (0-20% EtOAc for 25 cv, ramped to 100% EtOAc and then held at 100% EtOAc for 25-35 cv) on a 12 g silica column to afford **S-18a** in 71% yield (47 mg, 0.14 mmol, rr 10:1) as a colorless liquid.  $^{19}\text{F}$  NMR (376 MHz, Chloroform-*d*)  $\delta$  -56.36 (t,  $J = 21.3$  Hz, 3F), -140.90 – -141.06 (m, 2F), -141.07 – -141.33 (m, 2F).  $^1\text{H}$  NMR (400 MHz, Chloroform-*d*)  $\delta$  4.02 (qd,  $J = 7.2, 3.1$  Hz, 2H), 3.72 (dt,  $J = 8.7, 6.9$  Hz, 1H), 2.87 – 2.61 (m, 2H), 1.33 (d,  $J = 7.2$  Hz, 3H), 1.13 (t,  $J = 7.1$  Hz, 3H).  $^{13}\text{C}\{^1\text{H}\}$  NMR (101 MHz, Chloroform-*d*)  $\delta$  171.3, 147.1 – 143.7 (m), 146.7 – 142.4 (m), 128.1 (t,  $J = 15.3$  Hz), 120.8 (q,  $J = 275.5, 275.1$  Hz), 108.3 – 107.2 (m), 60.9, 39.2 (t,  $J = 2.5$  Hz), 27.5, 19.2, 14.2. FT-IR  $\text{cm}^{-1}$  2990, 2944, 1738, 1663, 1497, 1328. GC/MS ( $m/z$ , relative intensity) 332 ( $M^+$ , 20), 245 (75), 231 (80), 60 (100). HRMS (ESI) Calcd. for  $\text{C}_{13}\text{H}_{11}\text{F}_7\text{O}_2$  [ $M + \text{H}$ ] $^+$  333.0726, found 333.1299.



### Synthesis of **S-19a** (methyl 3-(4-cyano-2,3,5,6-tetrafluorophenyl)butanoate)

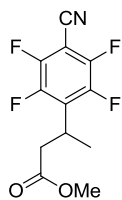

The **General procedure B** was followed using pentafluorobenzonitrile (50  $\mu$ L, 0.40 mmol, 1 equiv), methyl crotonate (254  $\mu$ L, 2.4 mmol, 6 equiv), *N,N*-diisopropylethylamine (83  $\mu$ L, 0.48 mmol, 1.2 equiv) and 4.0 mL of stock solution of Ir(ppy)<sub>3</sub> (0.66 mg, 0.001 mmol, 0.0025 equiv) in CH<sub>3</sub>CN was used. The crude material was purified by flash chromatography using hexane : ethyl acetate (0-2% EtOAc for 13 cv, ramped to 100 % EtOAc and then held at 100% EtOAc for 13-18 cv) on a 24 g silica column to afford **S-19a** in 54% yield (60 mg, 0.22 mmol) as a colorless liquid. <sup>19</sup>F NMR (376 MHz, Chloroform-*d*)  $\delta$  -132.66 – -132.85 (m, 2F), -139.60 (td, *J* = 16.4, 7.2 Hz, 2F). <sup>1</sup>H NMR (400 MHz, Chloroform-*d*)  $\delta$  3.80 (dq, *J* = 13.6, 7.2 Hz, 1H), 3.64 (s, 3H), 3.00 – 2.70 (m, 2H), 1.40 (d, *J* = 7.2 Hz, 3H). <sup>13</sup>C{<sup>1</sup>H} NMR (101 MHz, Chloroform-*d*)  $\delta$  171.7, 147.1 (ddt, *J* = 261.8, 17.3, 3.7 Hz), 144.91 (dddd, *J* = 249.3, 12.4, 7.1, 4.4 Hz), 130.7 (t, *J* = 15.8 Hz), 107.6, 92.4 (tt, *J* = 17.3, 2.5 Hz), 52.1, 38.8 (t, *J* = 2.8 Hz), 27.8, 19.2 (t, *J* = 2.0 Hz). FT-IR cm<sup>-1</sup> 2995, 2856, 2253, 1738, 1492, 1462. GC/MS (m/z, relative intensity) 275 (M<sup>+</sup>, 20), 202 (45), 188 (60), 74 (100), 59 (80). HRMS (ESI) Calcd. for C<sub>13</sub>H<sub>11</sub>F<sub>4</sub>NO<sub>2</sub> [M + Na]<sup>+</sup> 312.0624, found 312.9055.

### Synthesis of **S-20a** (methyl 3-(4-cyano-2,3,5,6-tetrafluorophenyl)butanoate)

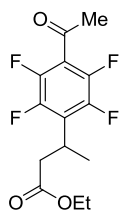

The **General procedure B** was followed using pentafluoroacetophenone (28  $\mu$ L, 0.2 mmol, 1 equiv), ethyl crotonate (148  $\mu$ L, 1.2 mmol, 6 equiv), *N,N*-diisopropylethylamine (42  $\mu$ L, 0.12 mmol, 1.2 equiv) and 2.0 mL of stock solution of Ir(ppy)<sub>3</sub> (0.3 mg, 0.0005 mmol, 0.0025 equiv) in CH<sub>3</sub>CN was used. The crude material was purified by flash chromatography using hexane : ether (0-7% EtOAc for 32 cv, ramped to 100% EtOAc and then held at 100% EtOAc for 32-40 cv) on a 12 g silica column to afford **S-20a** in 50% yield (30 mg, 0.1 mmol) as a brown liquid. <sup>19</sup>F NMR (376 MHz, Chloroform-*d*)  $\delta$  -141.88 (dd, *J* = 21.7, 12.5 Hz, 2F), -142.18 (dd, *J* = 21.9, 12.6 Hz, 2F). <sup>1</sup>H NMR (400 MHz, Chloroform-*d*)  $\delta$  4.09 (qd, *J* = 7.1, 2.9 Hz, 2H), 3.77 (h, *J* = 7.3 Hz, 1H), 2.89 – 2.68 (m, 2H), 2.61 (s, 3H), 1.39 (d, *J* = 7.2 Hz, 3H), 1.20 (t, *J* = 7.1 Hz, 3H). <sup>13</sup>C{<sup>1</sup>H} NMR (101 MHz, Chloroform-*d*)  $\delta$  192.3, 171.4, 146.6 – 144.9 (m), 144.0 – 142.4 (m), 126.7 (t, *J* = 15.8 Hz), 117.8 (t, *J* = 16.3 Hz), 60.8, 39.4 (t, *J* = 2.7 Hz), 32.5 (t, *J* = 2.5 Hz), 27.4, 19.3 (t, *J* = 1.9 Hz), 14.2. FT-IR cm<sup>-1</sup> 2984, 2941, 1736, 1711, 1481. GC/MS (m/z, relative intensity) 306 (M<sup>+</sup>, 25), 219 (30), 43 (100). HRMS (ESI) Calcd. for C<sub>14</sub>H<sub>14</sub>F<sub>4</sub>O<sub>3</sub> [M + H]<sup>+</sup> 307.0957, found 307.1149.

### Synthesis of **S-21a** (2,3,5,6-tetrafluoro-4-(2-methylcyclohexyl)benzonitrile)

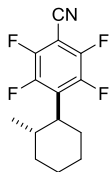

The **General procedure B** was followed using pentafluorobenzonitrile (12  $\mu$ L, 0.10 mmol, 1 equiv), 1-methyl -1- cyclohexene (72  $\mu$ L, 0.6 mmol, 6 equiv), *N,N*-diisopropylethylamine (21  $\mu$ L, 0.12 mmol, 1.2 equiv) and 1.0 mL of stock solution of Ir(ppy)<sub>3</sub> (0.16 mg, 0.00025 mmol, 0.0025 equiv) in CH<sub>3</sub>CN was used. The crude material was purified by flash chromatography using hexane : ethyl acetate (0-3% EtOAc for 13 cv, ramped to 100 % EtOAc and then held at 100% EtOAc for 13-18 cv) on a 12 g silica column to afford **S-21a** in 41% yield (11 mg, 0.04 mmol, dr 5.7:1) as a colorless liquid. <sup>19</sup>F NMR (376 MHz, Chloroform-*d*)  $\delta$  -133.02 – -133.32 (m, 2F), -138.12 – -139.97 (m, 2F). <sup>1</sup>H NMR (400 MHz, Chloroform-*d*)  $\delta$  2.75 (td, *J* = 11.5, 3.8 Hz, 1H), 2.00 – 1.69 (m, 6H), 1.40 – 1.24 (m, 2H), 1.14 – 1.02 (m, 1H), 0.73 (d, *J* = 6.5 Hz, 3H). <sup>13</sup>C{<sup>1</sup>H} NMR (101 MHz, Chloroform-*d*)  $\delta$  147.1 (ddt, *J* = 262.3, 18.2, 3.9 Hz), 146.3 – 143.5 (m), 131.8 (t, *J* = 16.5 Hz), 107.8 (t, *J* = 3.7 Hz), 92.0 – 91.4 (m), 43.6, 35.6, 34.9 (t, *J* = 2.3 Hz), 30.9, 26.5, 26.1, 208. FT-IR cm<sup>-1</sup> 2957, 2931, 2247, 1653, 1494. GC/MS (m/z, relative intensity) 271 (M<sup>+</sup>, 20), 201 (40), 70 (90), 55 (100). HRMS (ESI) Calcd. for C<sub>14</sub>H<sub>13</sub>F<sub>4</sub>N [M + Na]<sup>+</sup> 294.0882, found 294.1669.

Note: the isolated product has 15% of the minor diastereomer. The major diastereomer was determined from the <sup>1</sup>H-<sup>1</sup>H coupling constants. Assuming a chair conformer with the aryl group equatorial, for the trans isomer (major) the benzylic C–H couples to 3-<sup>1</sup>H's with dihedral angles of 177°, 179°, 63° whereas for the cis-isomer (minor), the dihedral angle was found 58.8°, 177°, 64°. Consequently, the trans isomer appears as a td whereas the cis isomer gives a dt.

### Synthesis of **S-22a** (7-cyclohexyl-4,5,6-trifluoro-2-phenylbenzofuran)

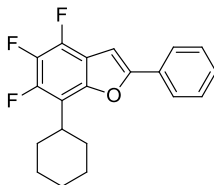

The **General procedure B** was followed using 4,5,6,7-tetrafluoro-2-phenylbenzofuran (27 mg, 0.10 mmol, 1 equiv), cyclohexene (60  $\mu$ L, 1.2 mmol, 6 equiv), *N,N*-diisopropylethylamine (21  $\mu$ L, 0.12 mmol, 1.2 equiv) and 1.0 mL of stock solution of Ir(ppy)<sub>3</sub> (0.16 mg, 0.00025 mmol, 0.0025 equiv) in CH<sub>3</sub>CN was used. The crude material was purified by prep tlc using hexane to afford **S-22a** in 58% yield (19 mg, 0.06 mmol) as white solid. <sup>19</sup>F NMR (376 MHz, Chloroform-*d*)  $\delta$  -142.36 (d, *J* = 19.4 Hz, 1F), -146.56 (d, *J* = 20.6 Hz, 1F), -149.88 (t, *J* = 20.1 Hz, 1F). <sup>1</sup>H NMR (400 MHz, Chloroform-*d*)  $\delta$  7.86 (d, *J* = 7.2 Hz, 2H), 7.47 (t, *J* = 7.4 Hz, 2H), 7.40 (t, *J* = 7.3 Hz, 1H), 7.09 (d, *J* = 2.8 Hz, 1H), 3.11 (tt, *J* = 11.9, 3.3 Hz, 1H), 2.03 – 1.72 (m, 7H), 1.50 – 1.27 (m, 3H). <sup>13</sup>C{<sup>1</sup>H} NMR (101 MHz, Chloroform-*d*)  $\delta$  157.7, 144.7 (ddd, *J* = 240.2, 12.5, 7.1 Hz), 143.1 – 140.2 (m), 139.2 – 138.1 (m), 129.5, 129.4, 129.1, 125.5, 125.3, 120.3 – 119.7 (m), 118.6 (dt, *J* = 20.3, 3.4 Hz), 101.4 – 100.4 (m), 98.1 – 97.9 (m), 97.7 – 97.4 (m), 35.9, 31.5, 27.1, 26.0. FT-IR cm<sup>-1</sup> 3150, 3062, 2939, 2853, 1511, 1489, 1446. GC/MS (m/z, relative intensity) 330 (M<sup>+</sup>, 100), 287 (80), 261 (90), 41 (90). HRMS (ESI) Calcd. for C<sub>20</sub>H<sub>17</sub>F<sub>3</sub>O [M + H]<sup>+</sup> 331.1310, found 331.1498. Melting point 100-105 °C

Note: the isolated product contains 5% minor regioisomer by GC-MS. The regiochemistry was assigned according to multiplicity of peaks on  $^{19}\text{F}$  NMR.

### Synthesis of **S-23a** 2-(2,4,5-trifluoro-3-phenoxy-6-(trifluoromethyl)phenyl)exo-bicyclo[2.2.1]heptane

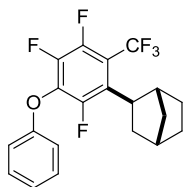

The **General procedure B** was followed using 1,2,4,5-tetrafluoro-3-phenoxy-6-(trifluoromethyl)benzene (93 mg, 0.30 mmol, 1 equiv), 2-norbornene (169 mg, 1.8 mmol, 6 equiv), *N,N*-diisopropylethylamine (63  $\mu\text{L}$ , 0.36 mmol, 1.2 equiv) and 3.0 mL of stock solution of  $\text{Ir}(\text{ppy})_3$  (0.5 mg, 0.0008 mmol, 0.0025 equiv) in  $\text{CH}_3\text{CN}$  was used. The crude material was purified by prep tlc using hexane to afford **S-23a** in 52% yield (61 mg, 0.16 mmol) as a colorless liquid.  $^{19}\text{F}$  NMR (376 MHz, Chloroform-*d*)  $\delta$  -52.63 (d,  $J = 37.7$  Hz, 3F), -124.76 (d,  $J = 10.8$  Hz, 1F), -138.96 (qdd,  $J = 37.8$ , 20.8, 11.9 Hz, 1F), -148.97 (dd,  $J = 20.8$ , 3.7 Hz, 1F).  $^1\text{H}$  NMR (400 MHz, Chloroform-*d*)  $\delta$  7.34 (t,  $J = 8.0$  Hz, 2H), 7.13 (t,  $J = 7.4$  Hz, 1H), 6.95 (d,  $J = 8.1$  Hz, 2H), 3.01 (t,  $J = 8.2$  Hz, 1H), 2.36 (s, 2H), 1.91-1.71 (m, 3H), 1.57 (dddt,  $J = 27.1$ , 15.7, 8.4, 3.6 Hz, 2H), 1.36 (t,  $J = 9.9$  Hz, 1H), 1.32 – 1.18 (m, 2H).  $^{13}\text{C}\{^1\text{H}\}$  NMR (101 MHz, Chloroform-*d*)  $\delta$  157.1, 151.2 (dt,  $J = 249.4$ , 3.2 Hz), 148.0 – 145.0 (m), 143.4 (ddd,  $J = 253.4$ , 16.6, 5.1 Hz), 136.0 (ddd,  $J = 19.0$ , 11.8, 3.1 Hz), 130.0, 129.7 (dd,  $J = 15.1$ , 4.1 Hz), 124.0 – 123.7 (m), 123.9, 115.5, 114.4 (dt,  $J = 31.1$ , 6.4 Hz), 43.6 (d,  $J = 2.5$  Hz), 42.2, 39.6 (d,  $J = 4.3$  Hz), 37.7 (d,  $J = 12.5$  Hz), 37.0, 32.3, 27.8 (d,  $J = 2.9$  Hz). FT-IR  $\text{cm}^{-1}$  2963, 2874, 1636, 1588, 1494, 1312. GC/MS (*m/z*, relative intensity) 386 ( $\text{M}^+$ , 15), 318 (80), 77 (100), 67 (60). HRMS (ESI) Calcd. for  $\text{C}_{20}\text{H}_{16}\text{F}_6\text{O}$  [ $\text{M} + \text{H}$ ] $^+$  387.1184, found 387.1780.

Note: isolated product contains 5% ((2,4-difluoro-3-phenoxy-6-(trifluoromethyl)phenyl)exo-bicyclo[2.2.1]heptane), a product of subsequent hydrodefluorination of **S-23a**.

### Synthesis of **S-24a** methyl 2-(exo-bicyclo[2.2.1]heptan-2-yl)-3,5,6-trifluoro-4-(2-methoxy-2-oxoethyl)benzoate

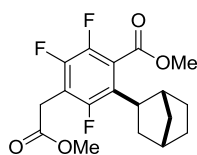

The **General procedure B** was followed using methyl 2,3,5,6-tetrafluoro-4-(2-methoxy-2-oxoethyl)benzoate (168 mg, 0.60 mmol, 1 equiv), 2-norbornene (341 mg, 3.6 mmol, 6 equiv), *N,N*-diisopropylethylamine (125  $\mu\text{L}$ , 0.72 mmol, 1.2 equiv) and 6.0 mL of stock solution of  $\text{Ir}(\text{ppy})_3$  (0.98 mg, 0.0015 mmol, 0.0025 equiv) in  $\text{CH}_3\text{CN}$  was used. The crude material was purified by flash chromatography using hexane : ether (0-21% ether for 40 cv, ramped to 100% ether and then held at 100% ether for 40-50 cv) on a 12 g silica column to afford **S-24a** in 60% yield (128 mg, 0.36 mmol) as a colorless liquid.  $^{19}\text{F}$  NMR (376 MHz, Chloroform-*d*)  $\delta$  -115.92 (d,  $J = 14.9$  Hz, 1F), -139.56 (dd,  $J = 22.4$ , 3.4 Hz, 1F), -144.48 (dd,  $J = 22.5$ , 14.9 Hz, 1F).  $^1\text{H}$  NMR (400 MHz, Chloroform-*d*)  $\delta$  3.95 (s, 3H), 3.73 (s, 3H), 3.71 (s, 2H), 2.64 (dd,  $J = 9.1$ , 6.7 Hz, 1H), 2.45 (s, 1H), 2.33 (s, 1H), 1.81 (m,

2H), 1.70 (dd,  $J = 20.8, 11.2$  Hz, 1H), 1.60 – 1.56 (m, 1H), 1.30 – 1.14 (m, 4H).  $^{13}\text{C}\{^1\text{H}\}$  NMR (101 MHz, Chloroform-*d*)  $\delta$  169.4, 165.0(t,  $J = 3.3$  Hz), 154.4 (ddd,  $J = 246.8, 5.1, 2.9$  Hz), 146.8 (ddd,  $J = 249.7, 14.5, 8.5$  Hz), 143.9 (ddd,  $J = 247.7, 14.5, 3.5$  Hz), 126.9 (dd,  $J = 17.5, 4.5$  Hz), 123.7 (dd,  $J = 15.0, 8.1$  Hz), 114.3 (dd,  $J = 24.9, 15.7$  Hz), 53.1, 52.7, 44.0, 42.7 (d,  $J = 3.1$  Hz), 39.2 (d,  $J = 3.9$  Hz), 37.4 (d,  $J = 8.6$  Hz), 36.8, 31.8, 28.6 – 28.3 (m), 28.3 (d,  $J = 2.1$  Hz). FT-IR  $\text{cm}^{-1}$  2957, 2874, 1741, 1481, 1438, 1363. GC/MS ( $m/z$ , relative intensity) 356 ( $\text{M}^+$ , 5), 288 (20), 81 (55), 59 (100). HRMS (ESI) Calcd. for  $\text{C}_{18}\text{H}_{19}\text{F}_3\text{O}_4$  [ $\text{M} + \text{Na}$ ] $^+$  379.1133, found 379.1116.

### Synthesis of **S-25a** *N*-(3-(exo-bicyclo[2.2.1]heptan-2-yl)-2,5,6-trifluoro-4-(trifluoromethyl)phenyl)acetamide

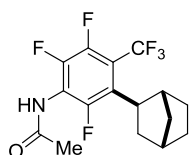

The **General procedure B** was followed using *N*-(2,3,5,6-tetrafluoro-4-(trifluoromethyl)phenyl)acetamide (28 mg, 0.10 mmol, 1 equiv), 2-norbornene (56 mg, 0.6 mmol, 6 equiv), *N,N*-diisopropylethylamine (21  $\mu\text{L}$ , 0.12 mmol, 1.2 equiv) and 1.0 mL of stock solution of  $\text{Ir}(\text{ppy})_3$  (0.16 mg, 0.00025 mmol, 0.0025 equiv) in  $\text{CH}_3\text{CN}$  was used. The crude material was purified by flash chromatography using hexane : ethyl acetate (0-15% EtOAc for 35 cv, ramped to 100% EtOAc and then held at 100% EtOAc for 35-45 cv) on a 12 g silica column to afford **S-25a** in 54% yield (19 mg, 0.05 mmol) as a colorless liquid.  $^{19}\text{F}$  NMR (376 MHz, Chloroform-*d*)  $\delta$  -52.91 (d,  $J = 37.7$  Hz, 3F), -118.03 – -118.21 (m, 1F), -138.19 (s, 1F), -139.52 – -140.05 (m, 1F).  $^1\text{H}$  NMR (400 MHz, Chloroform-*d*)  $\delta$  6.94 (s, 1H), 2.97 (t,  $J = 8.2$  Hz, 1H), 2.38 (t,  $J = 3.9$  Hz, 1H), 2.33 (s, 1H), 2.24 (s, 3H), 1.91 – 1.79 (m, 2H), 1.74 (t,  $J = 10.7$  Hz, 1H), 1.67 – 1.47 (m, 2H), 1.41 – 1.18 (m, 3H).  $^{13}\text{C}\{^1\text{H}\}$  NMR (101 MHz, Chloroform-*d*)  $\delta$  168.0, 151.3 (dt,  $J = 246.6, 3.2$  Hz), 147.6 – 144.5 (m), 144.26 (ddd,  $J = 253.3, 16.5, 5.5$  Hz), 128.9 – 1287 (m), 122.9 (dq,  $J = 275.4, 3.0, 2.6$  Hz), 119.5 – 118.9 (m), 116.7 – 115.7 (m), 43.5 (d,  $J = 2.4$  Hz), 42.0, 39.6 (d,  $J = 4.3$  Hz), 37.7 (d,  $J = 12.6$  Hz), 37.0, 32.3, 27.9 (d,  $J = 2.9$  Hz), 23.2. FT-IR  $\text{cm}^{-1}$  3241, 3199, 2963, 2874, 1685, 1634, 1524, 1478, 1374. GC/MS ( $m/z$ , relative intensity) 351 ( $\text{M}^+$ , 5), 284 (30), 241 (40), 43 (100). HRMS (ESI) Calcd. for  $\text{C}_{16}\text{H}_{15}\text{F}_6\text{NO}$  [ $\text{M} + \text{H}$ ] $^+$  352.1136, found 352.1801. Melting point 131-134  $^\circ\text{C}$ .

### Synthesis of **S-26a** methyl 2-(exo-bicyclo[2.2.1]heptan-2-yl)-4-(2-((2-ethoxy-2-oxoethyl)amino)-2-oxoethyl)-3,5,6-trifluorobenzoate

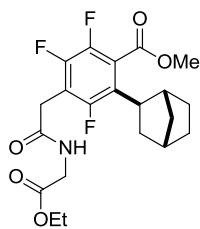

The **General procedure B** was followed except that higher catalyst loading (0.5 mol%) was used, using methyl 4-(2-((2-ethoxy-2-oxoethyl)amino)-2-oxoethyl)-2,3,5,6-tetrafluorobenzoate (140 mg, 0.40 mmol, 1 equiv), 2-norbornene (231 mg, 2.4 mmol, 6 equiv), *N,N*-diisopropylethylamine (84  $\mu\text{L}$ , 0.48 mmol, 1.2 equiv) and 4.0 mL of stock solution of  $\text{Ir}(\text{ppy})_3$  (1.3 mg, 0.002 mmol, 0.005 equiv) in  $\text{CH}_3\text{CN}$  was used. The crude material was purified by flash chromatography using hexane : ethyl acetate (0-18% EtOAc for 50 cv, ramped to 100% EtOAc

and then held at 100% EtOAc for 50-60 cv) on a 24 g silica column to afford S-26a in 39% yield (67 mg, 0.16 mmol) as a yellow viscous liquid.  $^{19}\text{F}$  NMR (376 MHz, Chloroform-*d*)  $\delta$  -115.62 (d,  $J = 14.9$  Hz, 1F), -139.10 (dd,  $J = 22.5, 3.1$  Hz, 1F), -144.01 (dd,  $J = 22.6, 14.9$  Hz, 1F).  $^1\text{H}$  NMR (400 MHz, Chloroform-*d*)  $\delta$  6.10 (s, 1H), 4.22 (q,  $J = 7.1$  Hz, 2H), 4.04 (d,  $J = 5.1$  Hz, 2H), 3.94 (s, 3H), 3.66 (s, 2H), 2.64 (dd,  $J = 9.6, 6.3$  Hz, 1H), 2.45 (s, 1H), 2.33 (s, 1H), 1.83 – 1.63 (m, 3H), 1.55 (dd,  $J = 8.5, 3.2$  Hz, 2H), 1.28 (t,  $J = 7.1$  Hz, 3H), 1.21 (dd,  $J = 8.9, 2.6$  Hz, 3H).  $^{13}\text{C}\{^1\text{H}\}$  NMR (101 MHz, Chloroform-*d*)  $\delta$  169.7, 167.8, 165.0 (t,  $J = 3.6$  Hz), 154.4 (dq,  $J = 247.0, 2.8$  Hz), 146.7 (ddd,  $J = 249.5, 14.3, 8.4$  Hz), 143.9 (ddd,  $J = 248.3, 14.5, 3.6$  Hz), 127.1 (dd,  $J = 17.5, 4.5$  Hz), 123.9 (dd,  $J = 15.2, 7.8$  Hz), 114.6 (dd,  $J = 25.0, 15.8$  Hz), 61.8, 53.1, 44.0 (d,  $J = 2.4$  Hz), 42.6 (d,  $J = 3.2$  Hz), 41.8, 39.2 (d,  $J = 3.8$  Hz), 37.4 (d,  $J = 8.5$  Hz), 36.8, 31.8, 30.4 – 30.3 (m), 28.2 (d,  $J = 2.2$  Hz), 14.2. FT-IR  $\text{cm}^{-1}$  3312, 2594, 1745, 1664, 1484, 1301, 1202. GC/MS (*m/z*, relative intensity) 427 ( $\text{M}^+$ , 10), 283 (20), 104 (100), 67 (100). HRMS (ESI) Calcd. for  $\text{C}_{21}\text{H}_{24}\text{F}_3\text{NO}_5$  [ $\text{M} + \text{H}$ ] $^+$  428.1685, found 428.1664.

Note: isolated product contains two minor products. The first is a minor regioisomer, 5%, which underwent alkylation meta to the methyl ester. The second compound, 9%, is (methyl 2-bicyclo[2.2.1]heptan-2-yl)-4-(2-((2-ethoxy-2-oxoethyl)amino)-2-oxoethyl)-3,5-difluorobenzoate) which is the product of subsequent hydrodefluorination of S-26a by  $^{19}\text{F}$  NMR.

### Synthesis of S-27a ethyl (2-(2-(exo-bicyclo[2.2.1]heptan-2-yl)-3,5,6-trifluoropyridin-4-yl)acetyl)glycinate

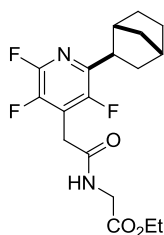

The **General procedure B** was followed except that **higher catalyst loading (0.5 mol%) was used**, using ethyl 2-(2-(perfluoropyridin-4-yl)acetamido)acetate (88 mg, 0.3 mmol, 1 eq), 2-norbornene (170 mg, 1.8 mmol, 6 equiv), *N,N*-diisopropylethylamine (63  $\mu\text{L}$ , 0.36 mmol, 1.2 eq) and 3.0 mL of stock solution of  $\text{Ir}(\text{ppy})_3$  (0.98 mg, 0.0015 mmol, 0.005 equiv) in  $\text{CH}_3\text{CN}$  was used. The crude material was purified by flash chromatography using hexane : ethyl acetate (0-20 % EtOAc for 55 cv, ramped to 100% EtOAc and then held at 100% EtOAc for 55-65 cv) on a 24 g silica column to afford **S-27a** in 61% yield (68 mg, 0.18 mmol) as a colorless liquid.  $^{19}\text{F}$  NMR (376 MHz, Chloroform-*d*)  $\delta$  -68.71 (dd,  $J = 28.6, 12.2$  Hz, 1F), -91.54 (dd,  $J = 23.5, 12.4$  Hz, 1F), -146.89 (ddt,  $J = 28.8, 23.9, 2.6$  Hz, 1F).  $^1\text{H}$  NMR (400 MHz, Chloroform-*d*)  $\delta$  6.24 (s, 1H), 4.21 (q,  $J = 7.1$  Hz, 2H), 4.02 (d,  $J = 5.1$  Hz, 2H), 3.79 (s, 2H), 2.75 (t,  $J = 7.9$  Hz, 1H), 2.44 (s, 1H), 2.35 (s, 1H), 1.84-1.67 (m, 3H), 1.57 (dt,  $J = 10.0, 3.1$  Hz, 2H), 1.27 (t,  $J = 7.2$  Hz, 3H), 1.2 (m, 3H).  $^{13}\text{C}\{^1\text{H}\}$  NMR (101 MHz, Chloroform-*d*)  $\delta$  169.6, 167.2, 152.5 (ddd,  $J = 244.7, 11.5, 2.4$  Hz), 146.4 (ddd,  $J = 243.5, 18.2, 16.2$  Hz), 141.6 (ddd,  $J = 251.7, 25.4, 6.1$  Hz), 138.5 (ddd,  $J = 11.4, 7.4, 2.3$  Hz), 125.5 (ddd,  $J = 27.7, 6.7, 1.5$  Hz), 61.9, 42.0 (d,  $J = 4.2$  Hz), 41.93 (d,  $J = 5.1$  Hz), 41.8, 38.9 (d,  $J = 3.7$  Hz), 37.6 (d,  $J = 8.7$  Hz), 36.5, 33.7 (q,  $J = 2.7$  Hz), 31.7, 28.3 (d,  $J = 2.2$  Hz), 14.2. GC/MS (*m/z*, relative intensity) 370 ( $\text{M}^+$ , 12), 211(25), 104 (100), 67 (100), 41

(100). FT-IR  $\text{cm}^{-1}$  32495, 3091, 2965, 1753, 1656, 1624, 1562, 1468. HRMS (ESI) Calcd. for  $\text{C}_{18}\text{H}_{21}\text{F}_3\text{N}_2\text{O}_3$   $[\text{M} + \text{H}]^+$  371.1583, found 371.1567.

### Synthesis of **S-28a** dimethyl 5-(4-(2-((2-ethoxy-2-oxoethyl)amino)-2-oxoethyl)-3,5,6-trifluoropyridin-2-yl)-7-exo-oxabicyclo[2.2.1]heptane-exo, exo-2,3-dicarboxylate

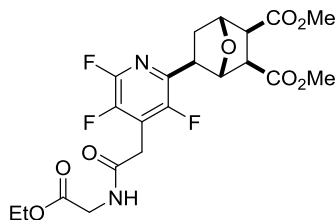

The **General procedure B** was followed **except that higher catalyst loading (0.5 mol%) was used**, using methyl 2-(perfluoropyridin-4-yl)acetate (88 mg, 0.30 mmol, 1 equiv), dimethyl-7-oxabicyclo[2.2.1]hept-5-ene exo,exo-2,3-dicarboxylate (305 mg, 1.4 mmol, 4.8 equiv), *N,N*-diisopropylethylamine (63  $\mu\text{L}$ , 0.36 mmol, 1.2 equiv) and 3.0 mL of stock solution of  $\text{Ir}(\text{ppy})_3$  (0.98 mg, 0.0015 mmol, 0.005 equiv) in  $\text{CH}_3\text{CN}$  was used. The crude material was purified by flash chromatography using hexane with triethyl amine : ethyl acetate (0-40% EtOAc for 100 cv, ramped to 100% EtOAc and then held at 100% EtOAc for 100-120 cv) on a 24 g silica column to afford **S-28a** in 61% yield (89 mg, 0.18 mmol) as a yellow viscous liquid.  $^{19}\text{F}$  NMR (376 MHz, Chloroform-*d*)  $\delta$  -72.14 (dd,  $J = 27.9, 12.5$  Hz, 1F), -90.22 (dd,  $J = 22.9, 12.5$  Hz, 1F), -145.88 – -146.12 (m, 1F).  $^1\text{H}$  NMR (400 MHz, Chloroform-*d*)  $\delta$  6.43 (t,  $J = 5.4$  Hz, 1H), 5.14 (d,  $J = 4.9$  Hz, 1H), 4.99 (s, 1H), 4.20 (q,  $J = 7.1$  Hz, 2H), 4.12 – 3.91 (m, 4H), 3.68 (s, 3H), 3.65 (s, 3H), 3.34 (dd,  $J = 9.5, 6.4$  Hz, 1H), 3.26 – 3.09 (m, 2H), 2.15 (dd,  $J = 12.7, 9.3$  Hz, 1H), 1.96 (dt,  $J = 12.3, 5.9$  Hz, 1H), 1.27 (t,  $J = 7.2$  Hz, 3H).  $^{13}\text{C}\{^1\text{H}\}$  NMR (101 MHz, Chloroform-*d*)  $\delta$  171.5, 170.8, 169.6, 167.8, 153.0(ddd,  $J = 243.8, 12.0, 2.5$  Hz), 149.0 – 145.2 (m), 142.1 (ddd,  $J = 252.0, 24.7, 5.8$  Hz), 138.6 (dq,  $J = 12.7, 2.5$  Hz), 122.0 (dd,  $J = 27.2, 6.7$  Hz), 82.3, 78.9, 61.7, 53.4, 52.4, 52.3, 51.1, 41.7, 40.1, 38.7, 33.2 – 33.0 (m), 14.2. ). FT-IR  $\text{cm}^{-1}$  3293, 3105, 2997, 1742, 1635, 1567, 1481, 1430, 1374, 1202. HRMS (ESI) Calcd. for  $\text{C}_{21}\text{H}_{23}\text{F}_3\text{N}_2\text{O}_8$   $[\text{M} + \text{Na}]^+$  511.1304, found 511.1346.

### Synthesis of **S-29a** dimethyl 5-(4-(2-((2-ethoxy-2-oxoethyl)amino)-2-oxoethyl)-2,5,6-trifluoropyridin-3-yl)-7-exo-oxabicyclo[2.2.1]heptane-exo, exo-2,3-dicarboxylate

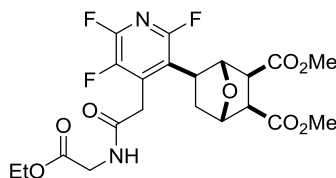

The **General procedure B** was followed **except catalyst *fac*-tris(2-4-*tert*-butylphenyl pyridinato- $\text{C}^2$ , *N*) Iridium(III) ( $\text{Ir}(\text{tbuppy})_3$ ) (0.5 mol%) was used**, using ethyl (2-(3-chloro-2,5,6-trifluoropyridin-4-yl)acetyl)glycinate (16 mg, 0.050 mmol, 1 equiv), dimethyl-7-oxabicyclo[2.2.1]hept-5-ene exo,exo-2,3-dicarboxylate (51 mg, 0.24 mmol, 4.8 equiv), *N,N*-diisopropylethylamine (10  $\mu\text{L}$ , 0.06 mmol, 1.2 equiv) and 0.5 mL of stock solution of  $\text{Ir}(\text{tbuppy})_3$  (0.2 mg, 0.00025 mmol, 0.005 equiv) in  $\text{CH}_3\text{CN}$  was used. The crude material was purified by flash chromatography using hexane with 1% triethyl amine : ethyl acetate (0-45% EtOAc for 50 cv, ramped to 100% EtOAc and then held at 100% EtOAc for 50-70 cv) on a 24 g silica column to afford **S-29a** in 50% yield (12 mg, 0.025 mmol) as a viscous

yellow liquid.  $^{19}\text{F}$  NMR (376 MHz, Acetone- $d_6$ )  $\delta$  -71.83 (dd,  $J = 27.9, 12.9$  Hz, 1F), -94.58 (dd,  $J = 23.5, 12.9$  Hz, 1F), -148.98 – -149.17 (m, 1F).  $^1\text{H}$  NMR (400 MHz, Acetone- $d_6$ )  $\delta$  7.80 (s, 1H), 4.98 (d,  $J = 5.0$  Hz, 1H), 4.89 (s, 1H), 4.15 (q,  $J = 7.2$  Hz, 2H), 4.10 (dd,  $J = 6.3, 2.4$  Hz, 2H), 3.98 (d,  $J = 5.7$  Hz, 2H), 3.60 (s, 3H), 3.58 (s, 3H), 3.46 (dd,  $J = 9.1, 6.4$  Hz, 1H), 3.40 – 3.24 (m, 2H), 2.25 (dd,  $J = 12.4, 9.3$  Hz, 1H), 1.92 (dt,  $J = 11.8, 5.9$  Hz, 1H), 1.23 (t,  $J = 7.1$  Hz, 3H).  $^{13}\text{C}\{^1\text{H}\}$  NMR (101 MHz, Acetone- $d_6$ )  $\delta$  172.2, 171.6, 170.4, 168.6, 153.7(ddd,  $J = 244.9, 12.3, 2.1$  Hz), 147.4(ddd,  $J = 240.4, 18.3, 16.2$  Hz), 144.6 – 141.5 (m), 141.3 (dd,  $J = 6.1, 2.0$  Hz), 124.3 (dd,  $J = 27.9, 6.5$  Hz), 83.2 (d,  $J = 1.8$  Hz), 79.4, 61.5, 53.7, 51.9, 51.9, 51.5, 41.9, 41.2 (d,  $J = 4.0$  Hz), 38.7(d,  $J = 1.9$  Hz), 33.5(d,  $J = 3.5$  Hz), 14.4. FT-IR  $\text{cm}^{-1}$  3301, 3089, 3003, 2922, 1742, 1653, 1637, 1557, 1481, 1433, 1377, 1213. HRMS (ESI) Calcd. for  $\text{C}_{21}\text{H}_{23}\text{F}_3\text{N}_2\text{O}_8$   $[\text{M} + \text{Na}]^+$  511.1304, found 511.1330.

### Synthesis of **S-30a** methyl (1'R,3'S)-2,3,5,6-tetrafluoro-3'-isopropyl-6'-methyl-1',2',3',4'-tetrahydro-[1,1'-biphenyl]-4-carboxylate

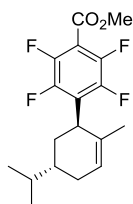

The **General procedure B** was followed using methyl 2,3,4,5,6-pentafluorobenzoate (46 mg, 0.2 mmol, 1 equiv),  $\alpha$ -pinene (192  $\mu\text{L}$ , 1.2 mmol, 6.0 equiv), *N,N*-diisopropylethylamine (42  $\mu\text{L}$ , 0.24 mmol, 1.2 equiv) and 2.0 mL of stock solution of  $\text{Ir}(\text{ppy})_3$  (0.3 mg, 0.0005 mmol, 0.0025 equiv) in  $\text{CH}_3\text{CN}$  was used. The crude material was purified by flash chromatography using hexane : ethyl acetate (0-3% EtOAc for 15 cv, ramped to 100 % EtOAc and then held at 100% EtOAc for 15-25 cv) on a 12 g silica column and then by reverse phase flash chromatography using MeCN: isopropanol (0-3% isopropanol for 8 cv, ramped and then held at 100% isopropanol for 8-18 cv) on a C18 26 g column to afford **S-30a** in 54% yield (37 mg, 0.11 mmol) as a colorless liquid.  $^{19}\text{F}$  NMR (376 MHz, Chloroform-*d*)  $\delta$  -140.13 – -140.31 (m, 2F), -141.95 – -142.17 (m, 2F).  $^1\text{H}$  NMR (400 MHz, Chloroform-*d*)  $\delta$  5.62 (td,  $J = 3.2, 1.7$  Hz, 1H), 3.97 (s, 3H), 3.74 (t,  $J = 5.5$  Hz, 1H), 2.29 – 2.05 (m, 1H), 1.99 – 1.68 (m, 3H), 1.57 (s, 3H), 1.49 (dd,  $J = 13.6, 6.9$  Hz, 1H), 0.95 – 0.81 (m, 6H).  $^{13}\text{C}\{^1\text{H}\}$  NMR (101 MHz, Chloroform-*d*)  $\delta$  160.6, 146.9 – 143.7 (m), 146.0 – 142.8 (m), 130.6, 127.5 (t,  $J = 15.2$  Hz), 124.6, 124.5, 110.4 (td,  $J = 15.6, 4.5$  Hz), 53.3, 40.5, 36.5, 33.4, 30.8, 28.7, 22.3, 20.4, 20.1. FT-IR  $\text{cm}^{-1}$  2957, 2923, 1744, 1650, 1478, 1436, 1304, 1224. GC/MS (*m/z*, relative intensity) 344 ( $\text{M}^+$ , 10), 301 (20), 95 (40), 41 (100). HRMS (ESI) Calcd. for  $\text{C}_{18}\text{H}_{20}\text{F}_4\text{O}_2$   $[\text{M} + \text{H}]^+$  345.1478, found 345.1299.  $[\alpha]_{\text{D}}^{25} = 53$  (c 0.75,  $\text{CH}_2\text{Cl}_2$ ).

### Synthesis of **S-31a** dimethyl 5-(4-(2-((2-ethoxy-2-oxoethyl)amino)-2-oxoethyl)-3,5-difluoropyridin-2-yl)-7-exo-oxabicyclo[2.2.1]heptane-exo, exo-2,3-dicarboxylate

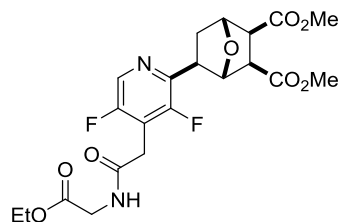

The **General procedure E** was followed using dimethyl 5-(4-(2-((2-ethoxy-2-oxoethyl)amino)-2-oxoethyl)-3,5,6-trifluoropyridin-2-yl)-7-oxabicyclo[2.2.1]heptane-exo,exo-2,3-dicarboxylate (30 mg, 0.061 mmol, 1 equiv), *N,N*-diisopropylethylamine (31  $\mu$ L, 0.18 mmol, 3 equiv) and 0.6 mL of stock solution of Ir(ppy)<sub>3</sub> (0.5 mg, 0.0008 mmol) in CH<sub>3</sub>CN was used. The crude material (crude shows 1.5:1

regioisomer by <sup>19</sup>F NMR) was purified by flash chromatography using hexane with triethyl amine : ethyl acetate (0-65% EtOAc for 55 cv, ramped to 100% EtOAc and then held at 100% EtOAc for 55-65 cv) on a 4 g silica column to afford **S-31a** in 93% yield (26 mg, 0.055 mmol) as a pale yellow viscous liquid. <sup>19</sup>F NMR (376 MHz, Acetone-*d*<sub>6</sub>)  $\delta$  -70.46 (d, *J* = 29.0 Hz, 1F), -135.75 (d, *J* = 29.0 Hz, 1F). <sup>1</sup>H NMR (400 MHz, Acetone-*d*<sub>6</sub>)  $\delta$  7.95 (d, *J* = 1.9 Hz, 1H), 7.78 (t, *J* = 6.0 Hz, 1H), 4.98 (d, *J* = 5.0 Hz, 1H), 4.89 (s, 1H), 4.14 (q, *J* = 7.2 Hz, 2H), 4.05 – 3.94 (m, 4H), 3.60 (s, 3H), 3.58 (s, 3H), 3.48 (dd, *J* = 9.4, 6.3 Hz, 1H), 3.41 – 3.25 (m, 2H), 2.24 (dd, *J* = 12.3, 9.2 Hz, 1H), 1.92 (dt, *J* = 11.9, 5.7 Hz, 1H), 1.22 (t, *J* = 7.1 Hz, 3H). <sup>13</sup>C{<sup>1</sup>H} NMR (151 MHz, Acetone-*d*<sub>6</sub>)  $\delta$  172.2, 171.6, 170.5, 169.1, 158.3 (d, *J* = 236.2 Hz), 157.6 (dd, *J* = 248.1, 3.9 Hz), 137.1 (dd, *J* = 15.7, 6.2 Hz), 132.0 (dd, *J* = 29.7, 17.6 Hz), 127.2 (d, *J* = 31.1 Hz), 83.2, 79.4, 61.5, 53.9, 51.9, 51.9, 51.5, 41.9, 41.6 (d, *J* = 3.9 Hz), 38.8, 33.0, 14.5. . FT-IR cm<sup>-1</sup> 3371, 2986, 1742, 1688, 1538, 1414. HRMS (ESI) Calcd. for C<sub>21</sub>H<sub>24</sub>F<sub>2</sub>N<sub>2</sub>O<sub>8</sub> [M + Na]<sup>+</sup> 493.1398, found 493.1362.

Note: the stereochemical assignment was made on the basis of coupling constant value that matched with the literature<sup>8</sup> value of this bicyclic system.

### Synthesis of **S-32a** dimethyl 5-(4-(2-((2-ethoxy-2-oxoethyl)amino)-2-oxoethyl)-2,5-difluoropyridin-3-yl)-7-exo-oxabicyclo[2.2.1]heptane-exo,exo-2,3-dicarboxylate

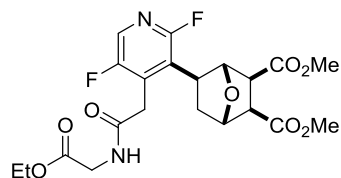

The **General procedure E** was followed using dimethyl 5-(4-(2-((2-ethoxy-2-oxoethyl)amino)-2-oxoethyl)-2,5,6-trifluoropyridin-3-yl)-7-oxabicyclo[2.2.1]heptane-exo,exo-2,3-dicarboxylate (20 mg, 0.041 mmol, 1 equiv), *N,N*-diisopropylethylamine (21  $\mu$ L, 0.12 mmol, 3 equiv) and 0.4 mL of stock solution of Ir(ppy)<sub>3</sub> (0.3 mg, 0.0005 mmol) in CH<sub>3</sub>CN was used. The crude material was purified by flash chromatography using hexane with triethyl amine : ethyl acetate (0-70% EtOAc for 25 cv, ramped to 100% EtOAc and then held at 100% EtOAc for 25-35 cv) on a 4 g silica column to afford **S-32a** in 95% yield (18 mg, 0.038 mmol, 1:1.5 rr) as a pale yellow viscous liquid. <sup>19</sup>F NMR (376 MHz, Acetone-*d*<sub>6</sub>)  $\delta$  -70.43 (dd, *J* = 29.0, 9.9 Hz, 1F), -135.73 (d, *J* = 28.6 Hz, 1F). <sup>1</sup>H NMR (400 MHz, Acetone-*d*<sub>6</sub>)  $\delta$  7.94 (s, 1H), 7.81 – 7.73 (m, 1H), 4.98 (d, *J* = 4.9 Hz, 1H), 4.89 (s, 1H), 4.14 (q, *J* = 7.1 Hz, 2H), 4.08 – 3.99 (m, 2H), 3.97 (d, *J* = 5.7 Hz, 2H), 3.60 (s, 3H), 3.58 (s, 3H), 3.47 (dd, *J* = 9.4, 6.3 Hz, 1H), 3.41 – 3.25 (m, 2H), 2.24 (dd, *J* = 12.3, 9.2 Hz, 1H), 1.92 (dt, *J* = 12.0, 5.8 Hz, 1H), 1.22 (t, *J* = 7.5 Hz, 3H). <sup>13</sup>C{<sup>1</sup>H} NMR (101 MHz, Acetone-*d*<sub>6</sub>)  $\delta$  172.3, 171.7, 170.6, 169.2, 158.9 (dd, *J* = 248.0,



4.1 Hz), 158.3 (d,  $J = 236.2$  Hz), 137.1 (dd,  $J = 15.6, 6.3$  Hz), 132.0 (dd,  $J = 29.7, 17.6$  Hz), 127.3 (d,  $J = 31.2$  Hz), 83.3 (d,  $J = 1.8$  Hz), 79.5, 61.6, 54.0, 52.0, 52.0, 51.6, 42.0, 41.7 (d,  $J = 4.0$  Hz), 38.9 (d,  $J = 1.9$  Hz), 34.0 – 32.7 (m), 14.6. FT-IR  $\text{cm}^{-1}$  3309, 2954, 2997, 1739, 1661, 1546, 1465, 1358. HRMS (ESI) Calcd. for  $\text{C}_{21}\text{H}_{24}\text{F}_2\text{N}_2\text{O}_8$   $[\text{M} + \text{Na}]^+$  493.1398, found 493.1372.

Minor regioisomer:

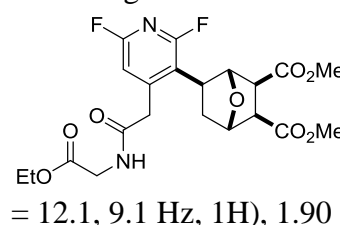  $^{19}\text{F}$  NMR (376 MHz, Acetone- $d_6$ )  $\delta$  -67.15 (d,  $J = 11.8$  Hz, 1F), -75.48 (d,  $J = 11.9$  Hz, 1F).  $^1\text{H}$  NMR (400 MHz, Acetone- $d_6$ )  $\delta$  7.74 (s, 1H), 6.99 (d,  $J = 2.0$  Hz, 1H), 4.97 (d,  $J = 5.0$  Hz, 1H), 4.85 (s, 1H), 4.15 (q,  $J = 7.1$  Hz, 2H), 4.04 – 3.90 (m, 4H), 3.61 (s, 3H), 3.58 (s, 3H), 3.52 – 3.44 (dd,  $J = 9.4, 6.3$  Hz, 1H), 3.41 – 3.23 (m, 2H), 2.24 (dd,  $J = 12.1, 9.1$  Hz, 1H), 1.90 (dt,  $J = 11.8, 5.8$  Hz, 1H), 1.23 (t,  $J = 7.1$  Hz, 3H).

Note: the stereochemical assignment was made on the basis of coupling constant value that matched with the literature<sup>8</sup> value of this bicyclic system.

**Not in manuscript.**

**Synthesis of S-33a' dimethyl 5-(2,5,6-trifluoro-4-(2-methoxy-2-oxoethyl)pyridin-3-yl)-exo-7-oxabicyclo[2.2.1]heptane-2,3-dicarboxylate**

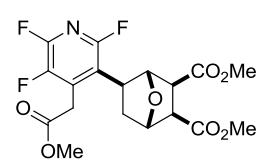 The **General procedure B** was followed using methyl 2-(3-chloro-2,5,6-trifluoropyridin-4-yl)acetate (48 mg, 0.20 mmol, 1 equiv), dimethyl-7-oxabicyclo[2.2.1]hept-5-ene exo,exo-2,3-dicarboxylate (203 mg, 0.96 mmol, 4.8 equiv), *N,N*-diisopropylethylamine (42  $\mu\text{L}$ , 0.24 mmol, 1.2 equiv) and 2.0 mL of stock solution of  $\text{Ir}(\text{ppy})_3$  (0.3 mg, 0.0005 mmol, 0.0025 equiv) in  $\text{CH}_3\text{CN}$  was used. The crude material was purified by flash chromatography using hexane : ethyl acetate (0-30 % EtOAc for 55 cv, ramped to 100% EtOAc and then held at 100% EtOAc for 55-70 cv) on a 12 g silica column to afford **S-33'a** in 64% yield (53 mg, 0.13 mmol) as a yellow viscous liquid.  $^{19}\text{F}$  NMR (376 MHz, Chloroform- $d$ )  $\delta$  -71.64 (dd,  $J = 28.1, 12.5$  Hz, 1F), -90.20 (dd,  $J = 22.7, 12.5$  Hz, 1F), -145.85 (ddt,  $J = 28.1, 22.5, 2.8$  Hz, 1F).  $^1\text{H}$  NMR (400 MHz, Chloroform- $d$ )  $\delta$  5.08 (d,  $J = 5.0$  Hz, 1H), 4.88 (s, 1H), 4.05 (s, 2H), 3.71 (s, 3H), 3.66 (s, 3H), 3.64 (s, 3H), 3.24 (dd,  $J = 9.6, 6.1$  Hz, 1H), 3.20 – 3.03 (m, 2H), 2.21 – 2.05 (m, 1H), 1.91 (dt,  $J = 12.2, 5.7$  Hz, 1H).  $^{13}\text{C}\{^1\text{H}\}$  NMR (101 MHz, Chloroform- $d$ )  $\delta$  171.2, 170.5, 169.2, 152.9 (ddd,  $J = 244.3, 11.9, 2.9$  Hz), 147.2 (ddd,  $J = 245.1, 18.1, 16.0$  Hz), 142.0 (ddd,  $J = 253.0, 25.2, 5.9$  Hz), 138.0 (ddd,  $J = 13.0, 4.8, 2.5$  Hz), 122.0 (dd,  $J = 27.3, 6.7$  Hz), 82.2, 78.6, 77.5, 53.3, 52.8, 52.3 (d,  $J = 5.5$  Hz), 51.1, 40.2, 38.4, 31.9. FT-IR  $\text{cm}^{-1}$  2960, 2920, 2850, 1731, 1631, 1460. GC/MS ( $m/z$ , relative intensity) 417 ( $\text{M}^+$ , 5), 185 (15), 59 (100).

**Synthesis of S-33a dimethyl 5-(2,5-difluoro-4-(2-methoxy-2-oxoethyl)pyridin-3-yl)-exo-7-oxabicyclo[2.2.1]heptane-2,3-dicarboxylate**

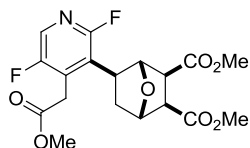

The **General procedure E** was followed using dimethyl 5-(2,5,6-trifluoro-4-(2-methoxy-2-oxoethyl)pyridine-3-yl)-**exo**-7-oxabicyclo [2.2.1]heptane-**exo**, **exo**-2,3-dicarboxylate **S-33a'** (70 mg, 0.17 mmol, 1 equiv), *N,N*-diisopropylethylamine (89  $\mu$ L, 0.51 mmol, 3 equiv) and 1.7 mL of stock solution of Ir(ppy)<sub>3</sub> in CH<sub>3</sub>CN was used. The crude material was purified by flash chromatography using hexane : ethyl acetate (0-50% EtOAc for 50 cv, ramped to 100% EtOAc and then held at 100% EtOAc for 50-60 cv) on a 24 g silica column to afford **S-33a** in 71% yield (48 mg, 0.12 mmol) as a colorless liquid. <sup>19</sup>F NMR (376 MHz, Chloroform-*d*)  $\delta$  -71.14 (d, *J* = 28.7 Hz, 1F), -132.70 (d, *J* = 28.7 Hz, 1F). <sup>1</sup>H NMR (400 MHz, Chloroform-*d*)  $\delta$  7.91 (s, 1H), 5.13 (d, *J* = 4.9 Hz, 1H), 4.94 (s, 1H), 4.04 (s, 2H), 3.73 (s, 3H), 3.69 (s, 3H), 3.67 (s, 3H), 3.32 (dd, *J* = 9.6, 6.3 Hz, 1H), 3.14 (m, 2H), 2.13 (dd, *J* = 12.7, 9.3 Hz, 1H), 2.01 – 1.90 (m, 1H). <sup>13</sup>C{<sup>1</sup>H} NMR (101 MHz, Chloroform-*d*)  $\delta$  171.3, 170.6, 169.9, 158.3 (dd, *J* = 40.1, 2.8 Hz), 155.8 (dd, *J* = 55.1, 2.8 Hz), 134.5 (dd, *J* = 16.0, 4.9 Hz), 132.0 (dd, *J* = 29.2, 17.3 Hz), 125.3 (d, *J* = 30.1 Hz), 82.2 (d, *J* = 1.4 Hz), 78.7 (d, *J* = 3.3 Hz), 53.6, 52.8, 52.4, 52.4, 51.2, 40.5, 38.7, 31.7 (dd, *J* = 4.4, 2.5 Hz). FT-IR cm<sup>-1</sup> 3008, 2954, 1737, 1468, 1430, 1409, 1347. GC/MS (m/z, relative intensity) 399 (M<sup>+</sup>, 5), 113 (10), 59 (100). HRMS (ESI) Calcd. for C<sub>18</sub>H<sub>19</sub>F<sub>2</sub>NO<sub>6</sub> [M + H]<sup>+</sup> 384.1258, found 384.0040.

Note: the stereochemical assignment was made on the basis of coupling constant value that matched with the literature<sup>8</sup> value of this bicyclic system.

### Synthesis of **S-34a** (methyl 2-(**exo**-bicyclo[2.2.1]heptan-2-yl)-3,5-difluoro-4-(2-methoxy-2-oxoethyl)benzoate)

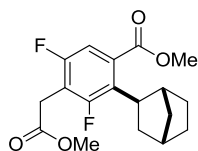

The **General procedure F** was followed using (methyl 2-(**exo**-bicyclo[2.2.1]heptan-2-yl)-3,5,6-trifluoro-4-(2-methoxy-2-oxoethyl)benzoate) (79 mg, 0.22 mmol, 1 equiv), *N,N*-diisopropylethylamine (765  $\mu$ L, 4.4 mmol, 20 equiv) and 2.2 mL of stock solution of Ir(CF<sub>3</sub>ppy)<sub>3</sub> (0.8 mg, 0.011 mmol, 0.005 equiv) in CH<sub>3</sub>CN was used. The crude material was purified by flash chromatography using hexane : ethyl acetate (0-5% EtOAc for 25 cv, ramped to 100% EtOAc and then held at 100% EtOAc for 25-35 cv) on a 4 g silica column to afford **S-34a** in 73% yield (54 mg, 0.06 mmol) as a colorless liquid. <sup>19</sup>F NMR (376 MHz, Chloroform-*d*)  $\delta$  -109.10 (s, 1F), -117.76 (t, *J* = 8.0 Hz, 1F). <sup>1</sup>H NMR (400 MHz, Chloroform-*d*)  $\delta$  7.18 (dd, *J* = 9.0, 1.3 Hz, 1H), 3.90 (s, 3H), 3.72 (s, 3H), 3.70 (s, 2H), 3.14 (t, *J* = 8.0 Hz, 1H), 2.44 (s, 1H), 2.33 (s, 1H), 1.79 (dd, *J* = 26.4, 9.0 Hz, 3H), 1.56 (m, 1H), 1.37 – 1.19 (m, 3H). <sup>13</sup>C{<sup>1</sup>H} NMR (101 MHz, Chloroform-*d*)  $\delta$  169.9, 167.8 – 167.5 (m), 160.4 (dd, *J* = 114.3, 7.9 Hz), 157.9 (dd, *J* = 111.4, 7.9 Hz), 133.5 (t, *J* = 8.7 Hz), 129.4 (dd, *J* = 15.7, 4.1 Hz), 114.2 (dd, *J* = 23.4, 19.1 Hz), 112.2 (dd, *J* = 23.7, 3.6 Hz), 77.4, 52.7, 52.5, 42.9 (t, *J* = 3.2 Hz), 39.5 (d, *J* = 4.1 Hz), 37.7, 37.6, 37.0, 32.0, 28.4 – 28.2 (m). FT-IR cm<sup>-1</sup> 2957, 2874, 1740, 1441, 1323. GC/MS (m/z, relative intensity) 338 (M<sup>+</sup>, 10), 306 (30), 270(25), 59 (100). HRMS (ESI) Calcd. for C<sub>18</sub>H<sub>20</sub>F<sub>2</sub>O<sub>3</sub> [M + H]<sup>+</sup> 323.1459, found 323.1821.

**Synthesis of S-35a N-(3-(exo-bicyclo[2.2.1]heptan-2-yl)-2,6-difluoro-4-(trifluoromethyl)phenyl)acetamide**

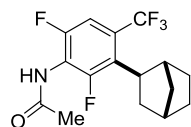

The **General procedure D** was followed using ethyl 2-(2-(2,3,5,6-tetrafluoro-4-(trifluoromethyl)phenyl)acetamido)acetate (56 mg, 0.20 mmol, 1 equiv), 2-norbornene (112 mg, 1.2 mmol, 6 equiv), *N,N*-diisopropylethylamine (42  $\mu$ L, 0.24 mmol, 1.2 equiv, for second step 104  $\mu$ L, 0.6 mmol, 3 equiv) and 2.0 mL of stock solution of Ir(ppy)<sub>3</sub> in CH<sub>3</sub>CN was used. The crude material was purified by flash chromatography using hexane : ethyl acetate (0-11% EtOAc for 57 cv, ramped to 100% EtOAc and then held at 100% EtOAc for 57-65 cv) on a 24 g silica column to afford **S-35a** in 56% yield (37 mg, 0.11 mmol) as a colorless liquid. <sup>19</sup>F NMR (376 MHz, Chloroform-*d*)  $\delta$  -58.6 (s, 3F), -111.6 (s, 1F), -117.8 (s, 1F). <sup>1</sup>H NMR (400 MHz, Chloroform-*d*)  $\delta$  7.29 (s, 1H), 6.79 (s, 1H), 2.97 (t, *J* = 8.1 Hz, 1H), 2.38 (s, 1H), 2.30 (s, 1H), 2.23 (s, 3H), 1.94 – 1.83 (m, 1H), 1.75 (q, *J* = 11.0 Hz, 1H), 1.56 (ddt, *J* = 27.6, 11.4, 5.7 Hz, 2H), 1.39 – 1.21 (m, 4H). <sup>13</sup>C{<sup>1</sup>H} NMR (151 MHz, Chloroform-*d*)  $\delta$  168.0, 156.6 (dd, *J* = 250.9, 4.4 Hz), 154.8 (dd, *J* = 250.8, 4.9 Hz), 129.4 – 128.3 (m), 123.4 (q, *J* = 274.8, 274.1 Hz), 117.9 (dd, *J* = 23.2, 10.3 Hz), 110.5 – 110.1 (m), 43.5, 41.6, 39.3, 37.4, 37.4, 36.9, 32.2, 27.7. FT-IR cm<sup>-1</sup> 3257, 3196, 3014, 2957, 2872, 1687, 1532, 1444, 1355. GC/MS (*m/z*, relative intensity) 333 (M<sup>+</sup>, 5), 223 (25), 43 (100). HRMS (ESI) Calcd. for C<sub>16</sub>H<sub>16</sub>F<sub>5</sub>NO [M + Na]<sup>+</sup> 356.1050, found 356.1035.

**Not in manuscript.**

**Synthesis of S-36a' ethyl (2-(exo-3-(bicyclo[2.2.1]heptan-2-yl)-2,5,6-trifluoro-4-(trifluoromethyl)phenyl)acetyl)glycinate**

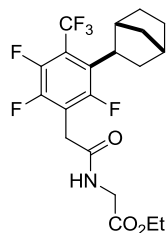

The **General procedure B** was followed using ethyl 2-(2-(2,3,5,6-tetrafluoro-4-(trifluoromethyl)phenyl)acetamido)acetate (144 mg, 0.40 mmol, 1 equiv), 2-norbornene (231 mg, 2.4 mmol, 6 equiv), *N,N*-diisopropylethylamine (84  $\mu$ L, 0.48 mmol, 1.2 equiv) and 4.0 mL of stock solution of Ir(ppy)<sub>3</sub> (1.3 mg, 0.002 mmol, 0.005 equiv) in CH<sub>3</sub>CN was used. The crude material was purified by flash chromatography using hexane : ethyl acetate (0-45% EtOAc for 50 cv, ramped to 100% EtOAc and then held at 100% EtOAc for 50-60 cv) on a 40 g silica column to afford **S-36a'** in 53% yield (93 mg, 0.21 mmol) as a yellow viscous liquid. <sup>19</sup>F NMR (376 MHz, Chloroform-*d*)  $\delta$  -53.08 (d, *J* = 37.6 Hz, 3F), -111.52 (d, *J* = 14.1 Hz, 1F), -137.63 (dd, *J* = 21.0, 3.7 Hz, 1F), -140.84 – -141.31 (m, 1F). <sup>1</sup>H NMR (400 MHz, Chloroform-*d*)  $\delta$  6.28 – 6.16 (m, 1H), 4.22 (q, *J* = 7.2 Hz, 2H), 4.05 (d, *J* = 5.0 Hz, 2H), 3.69 (s, 2H), 2.95 (t, *J* = 8.1 Hz, 1H), 2.39 – 2.30 (m, 2H), 1.87 (dddt, *J* = 22.8, 11.1, 6.7, 2.6 Hz, 2H), 1.71 (dd, *J* = 21.3, 9.2 Hz, 1H), 1.65 – 1.46 (m, 2H), 1.40 – 1.17 (m, 6H). <sup>13</sup>C{<sup>1</sup>H} NMR (101 MHz, Chloroform-*d*)  $\delta$  169.8, 167.4, 156.8 – 153.2 (m), 147.7 (ddd, *J* = 249.0, 15.7, 9.1 Hz), 147.03 – 143.98 (m), 128.8 (d, *J* = 17.5 Hz), 122.8 (dddd, *J* = 279.7, 276.9, 273.0, 3.3 Hz), 117.8 (ddd, *J* = 30.8, 8.2, 5.8 Hz), 117.2 (dd, *J* = 25.4, 15.8 Hz),

61.9, 43.4 (d,  $J = 2.5$  Hz), 41.9 (d,  $J = 2.8$  Hz), 39.6 (d,  $J = 4.4$  Hz), 37.7 (d,  $J = 12.8$  Hz), 37.0, 32.4, 30.4 – 30.2 (m), 27.8 (d,  $J = 2.9$  Hz), 14.2. FT-IR  $\text{cm}^{-1}$  3327, 3305, 2957, 2877, 1749, 1666, 1553, 1492, 1371. GC/MS (m/z, relative intensity) 437 ( $\text{M}^+$ , 5), 370 (50), 102 (80), 67 (100).

Note: isolated product contains three minor products. The first is a minor regioisomer, ethyl (2-(2-(bicyclo[2.2.1]heptan-2-yl)-3,5,6-trifluoro-4-(trifluoromethyl)phenyl)acetyl)glycinate, 5%, which underwent alkylation meta to the trifluoromethyl group. The second and third compounds, 3% and 4%, are ethyl (2-(2-(bicyclo[2.2.1]heptan-2-yl)-3,6-difluoro-4-(trifluoromethyl)phenyl)acetyl)glycinate and ethyl (2-(3-(bicyclo[2.2.1]heptan-2-yl)-2,6-difluoro-4-(trifluoromethyl)phenyl)acetyl)glycinate, which are the product of subsequent hydrodefluorination of minor regioisomer and major regioisomer of **S-36a'** respectively by  $^{19}\text{F}$  NMR.

### Synthesis of **36a** ethyl (2-(3-(exo-bicyclo[2.2.1]heptan-2-yl)-2,6-difluoro-4-(trifluoromethyl)phenyl)acetyl)glycinate

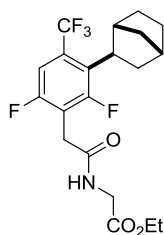

The General procedure D was followed using ethyl (2-(3-(bicyclo[2.2.1]heptan-2-yl)-2,5,6-trifluoro-4-(trifluoromethyl)phenyl)acetyl)glycinate (30 mg, 0.07 mmol, 1 equiv), *N,N*-diisopropylethylamine (37  $\mu\text{L}$ , 0.21 mmol, 3 equiv) and 0.7 mL of stock solution of  $\text{Ir}(\text{ppy})_3$  in  $\text{CH}_3\text{CN}$  was used. The crude material was purified by flash chromatography using hexane : ethyl acetate (0-19% EtOAc for 25 cv, ramped to 100% EtOAc and then held at 100% EtOAc for 25-35 cv) on a 4 g silica column to afford **S-36a** in 79% yield (23 mg, 0.05 mmol) as a colorless liquid.  $^{19}\text{F}$  NMR (376 MHz, Chloroform-*d*)  $\delta$  -58.79 (s, 3H), -105.73 (d,  $J = 6.9$  Hz, 1F), -115.73 (t,  $J = 8.2$  Hz, 1F).  $^1\text{H}$  NMR (400 MHz, Chloroform-*d*)  $\delta$  7.23 (dd,  $J = 9.4, 1.7$  Hz, 1H), 6.08 (s, 1H), 4.22 (q,  $J = 7.2$  Hz, 2H), 4.05 (d,  $J = 5.0$  Hz, 2H), 3.68 (s, 2H), 2.96 (t,  $J = 8.5$  Hz, 1H), 2.38 (t,  $J = 4.2$  Hz, 1H), 2.30 (d,  $J = 3.2$  Hz, 1H), 1.98 – 1.82 (m, 2H), 1.72 (dd,  $J = 11.9, 9.3$  Hz, 1H), 1.64 – 1.48 (m, 3H), 1.39 – 1.19 (m, 6H).  $^{13}\text{C}\{^1\text{H}\}$  NMR (151 MHz, Chloroform-*d*)  $\delta$  169.8, 168.0, 160.5 (dd,  $J = 250.9, 6.8$  Hz), 158.8 (dd,  $J = 247.3, 8.9$  Hz), 130.6 (dt,  $J = 30.5, 9.8$  Hz), 128.9 – 128.6 (m), 123.4 (q,  $J = 273.1$  Hz), 116.1 – 115.0 (m), 109.7, 61.8, 43.4, 41.8, 41.4, 39.3 (d,  $J = 4.0$  Hz), 37.6 (d,  $J = 12.6$  Hz), 37.0, 32.4, 27.9 (d,  $J = 2.7$  Hz), 14.3. FT-IR  $\text{cm}^{-1}$  3312, 2954, 2874, 1750, 1667, 1554, 1487, 1347. GC/MS (m/z, relative intensity) 419 ( $\text{M}^+$ , 5), 352 (50), 104 (100), 67 (95). HRMS (ESI) Calcd. for  $\text{C}_{20}\text{H}_{22}\text{F}_5\text{NO}_3$  [ $\text{M} + \text{H}$ ] $^+$  420.1598, found 420.1581.

Note: isolated product contains inseparable starting material (4%) and regioisomer 9% by  $^{19}\text{F}$  NMR.

### References

1. *J. Organomet. Chem.* **2015**, 776, 51.
2. *J. Am. Chem. Soc.* **2014**, 136, 3002.
3. *J. Org. Chem.* **2014**, 79, 10466.
4. *Green Chem.* **2013**, 15, 1318.
5. *J. Chem. Crystallogr.* **2007**, 37, 543.

6. *J. Organomet. Chem.* , **1989**, 368, 249.

7. *ARKIVOC* **2003** (ii) 15.

8.(a) NMR Spectroscopy of the Non-Metallic Elements. Berger, S ; Braun, S. ; Kalinowski, H. O.  
(b) *J. Chem. Faraday Trans. 2*, **1972**, 68, 241.(c) *J. Magn. Reson.* **1976**, 22, 207. (d) *J. Chem. Soc. B*, **1969**, 434.

**<sup>19</sup>F NMR (376 MHz, Chloroform-*d*, @ rt) of S-1a 4-cyclohexyl-2,3,5,6-tetrafluoropyridine (376 MHz, Chloroform-*d*, @ rt)**

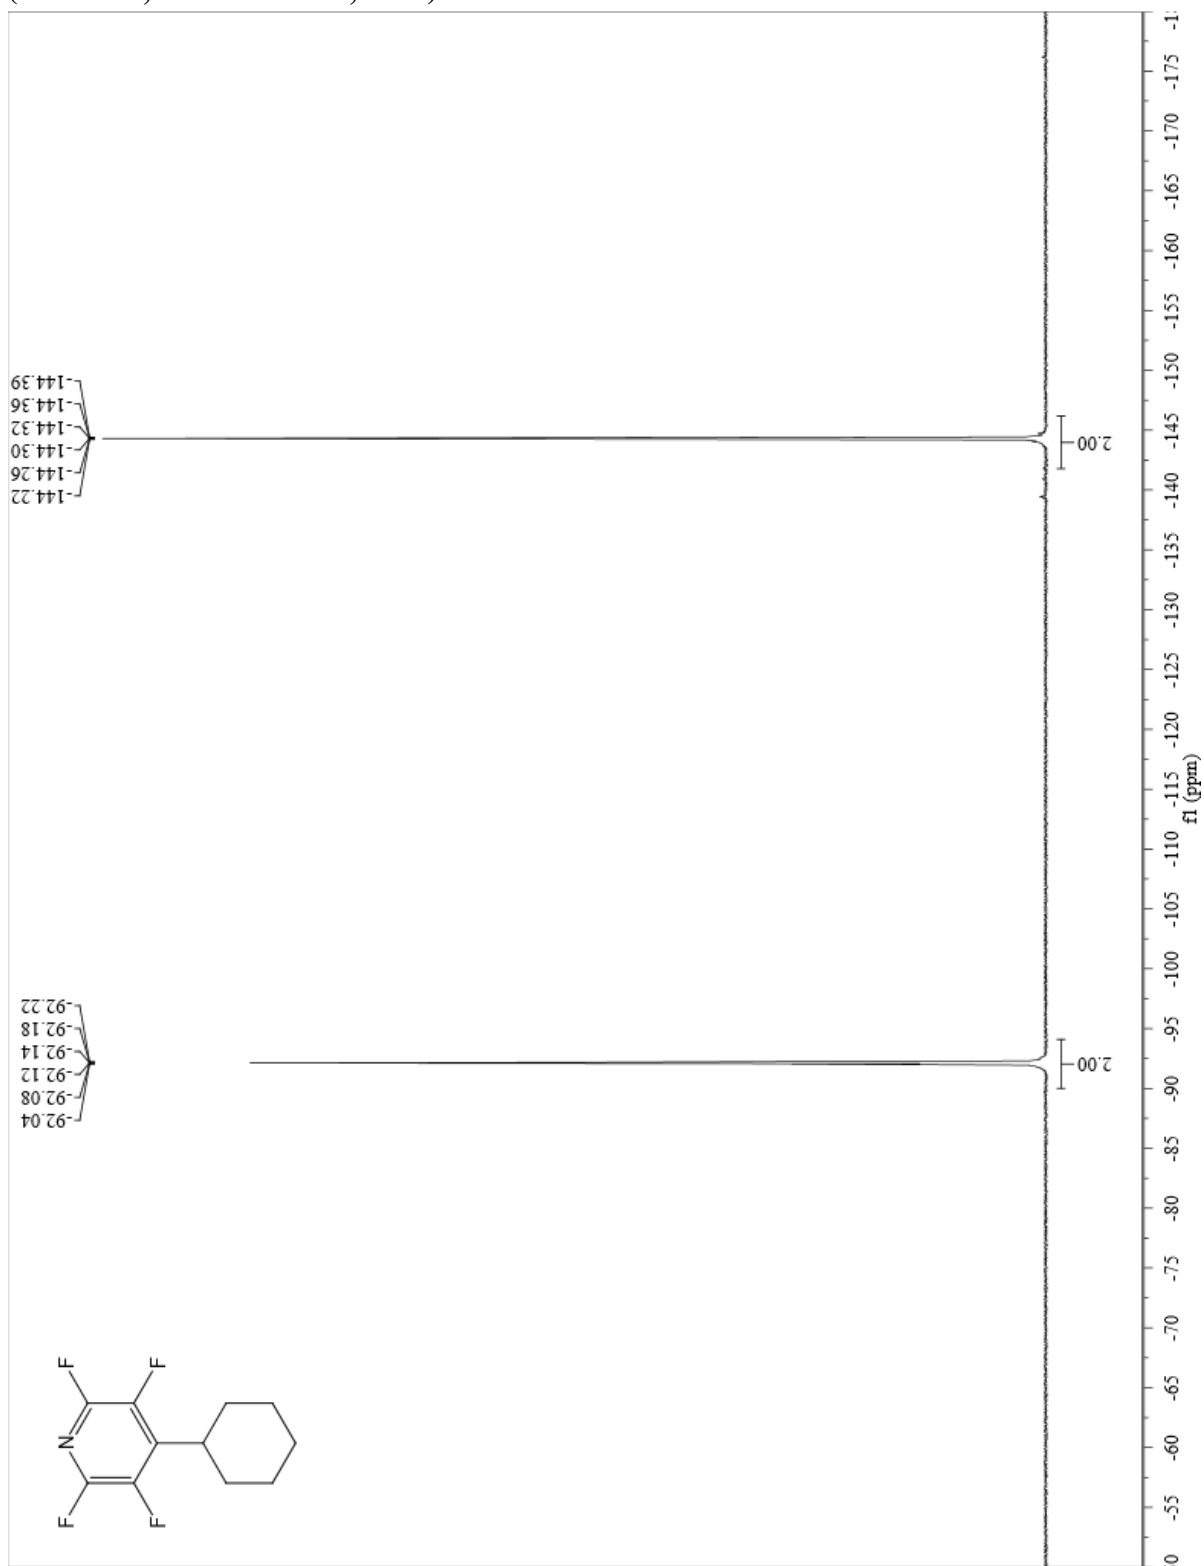

**<sup>1</sup>H NMR (400 MHz, Chloroform-*d*, @ rt) of S-1a 4-cyclohexyl-2,3,5,6-tetrafluoropyridine**

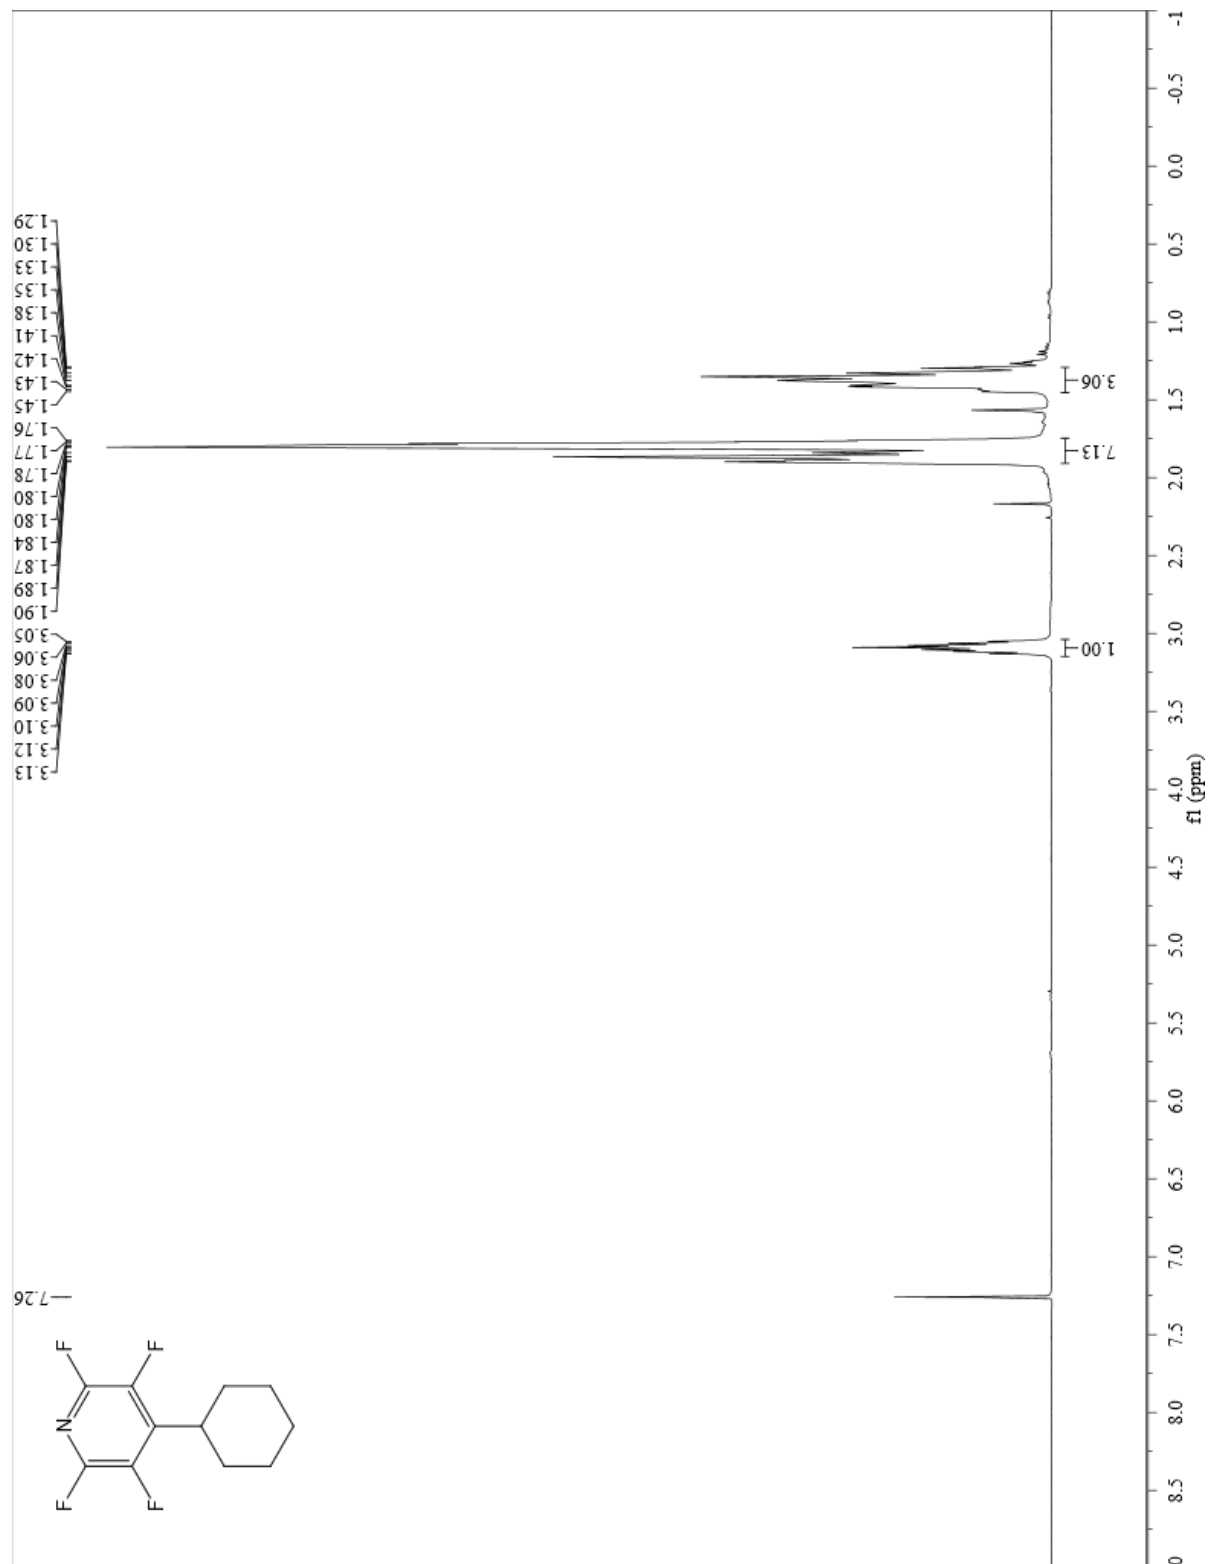

**$^{13}\text{C}\{^1\text{H}\}$  NMR (101 MHz, Chloroform-*d*, @ rt) of 1a 4-cyclohexyl-2,3,5,6-tetrafluoropyridine**

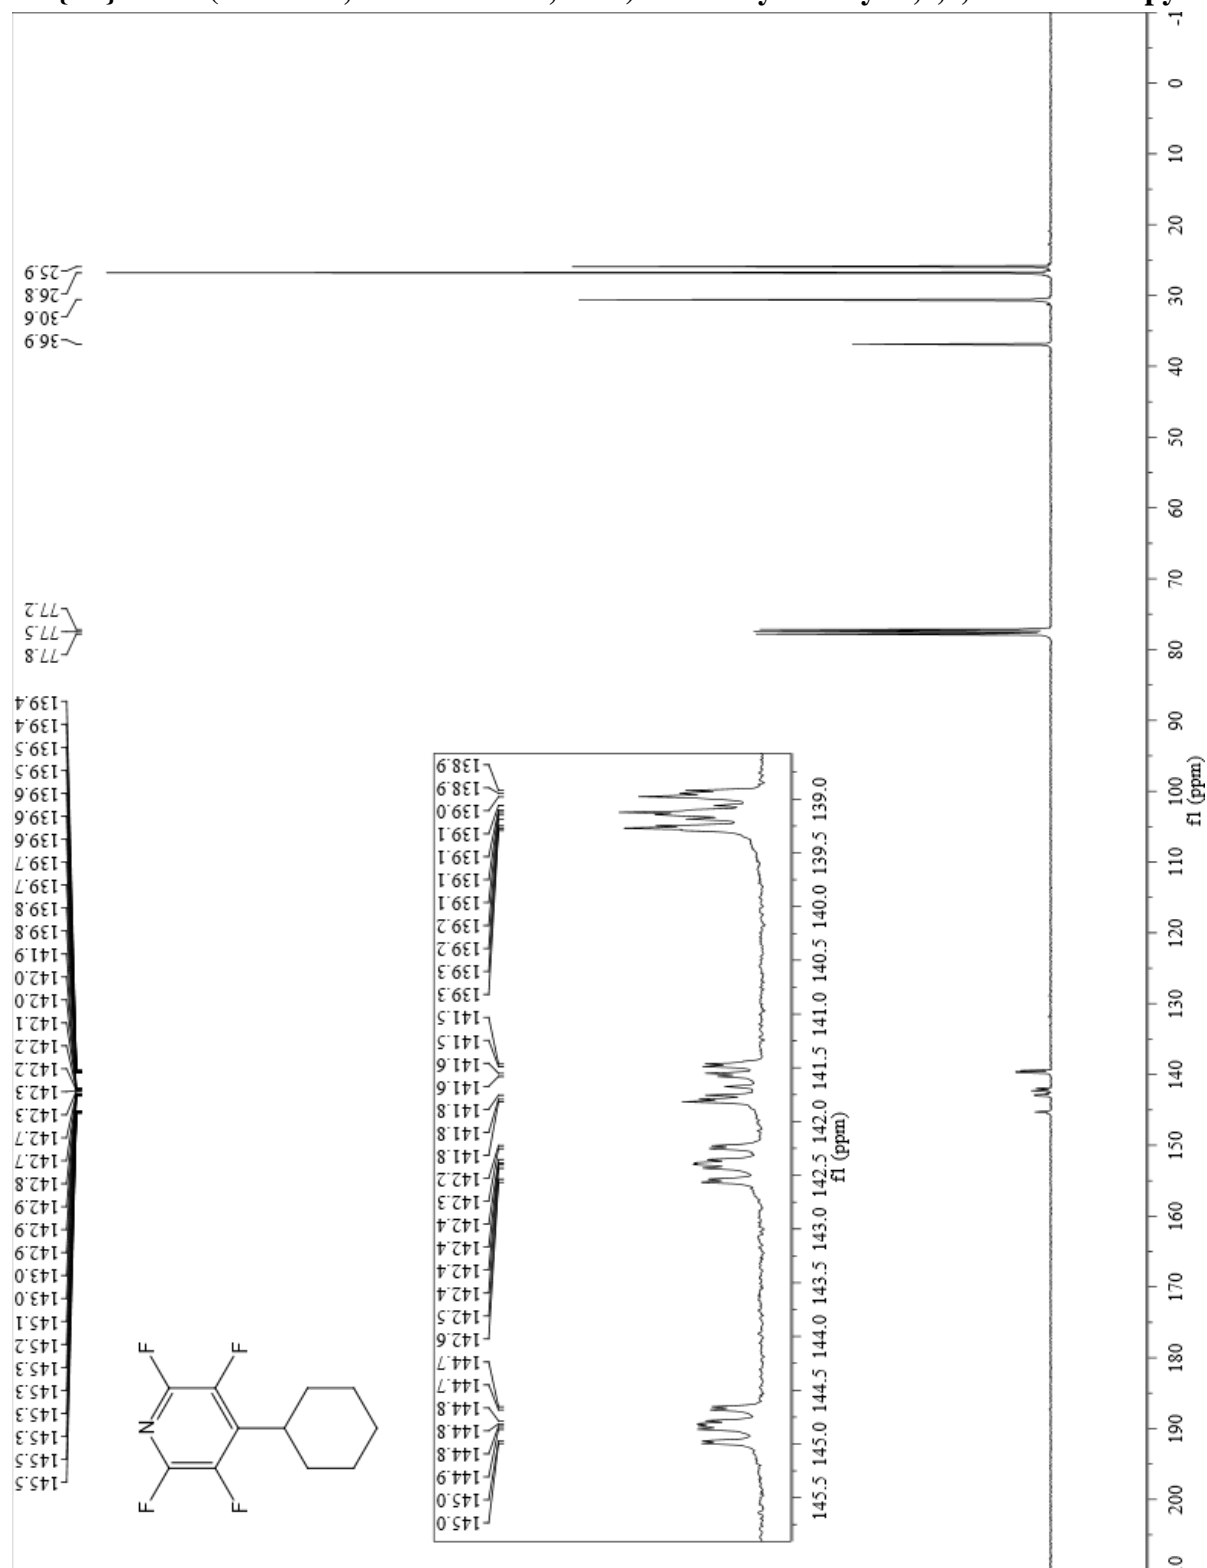



## GC and MS of 1a 4-cyclohexyl-2,3,5,6-tetrafluoropyridine

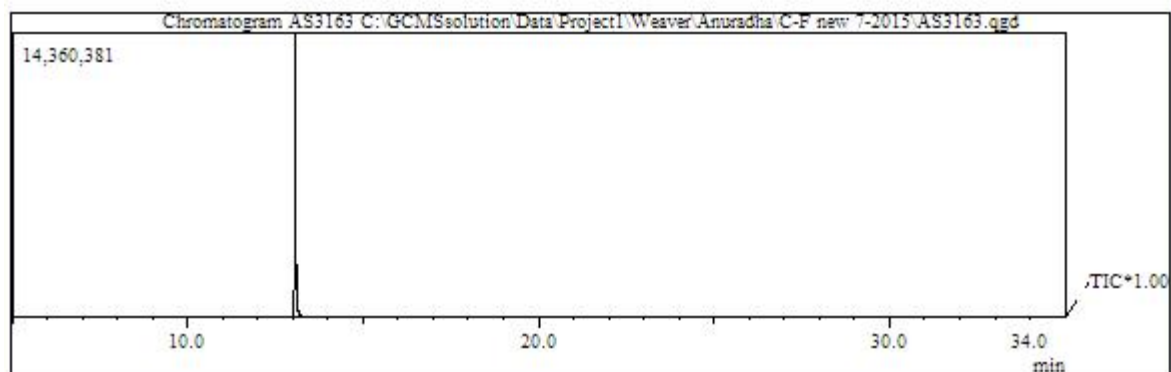

Spectrum

Line#:1 R.Time:13.1(Scan#:971)  
MassPeaks:178  
RawMode:Single 13.1(971) BasePeak:41(2959819)  
BG Mode:None

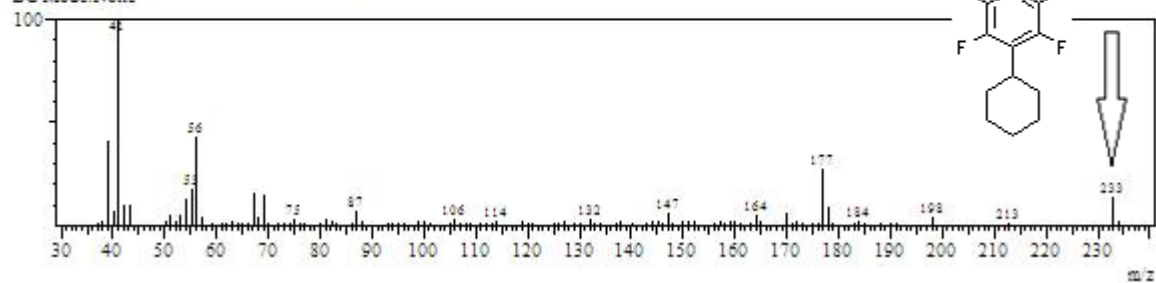

**<sup>19</sup>F NMR (376 MHz, Chloroform-*d*, @ rt) of S-2a 4-cyclohexyl-2,3,5,6-tetrafluorobenzonitrile**

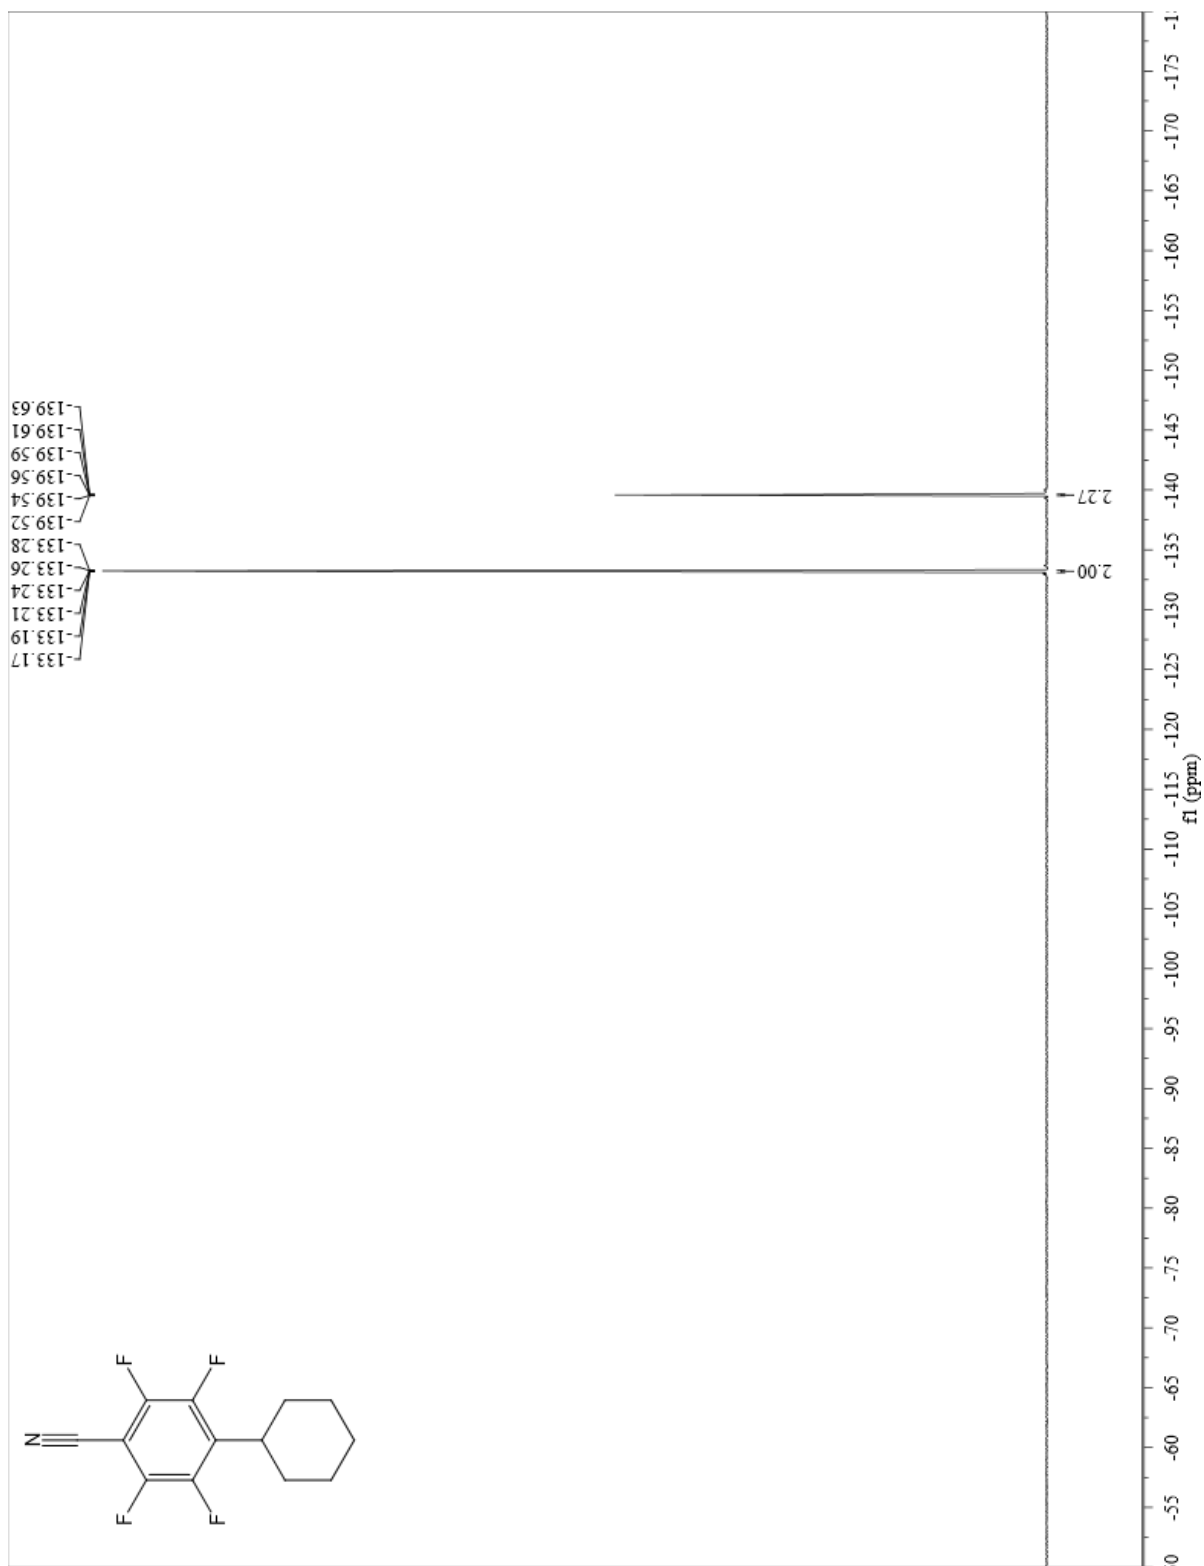

**<sup>1</sup>H NMR (400 MHz, Chloroform-*d*, @ rt) of S-2a 4-cyclohexyl-2,3,5,6-tetrafluorobenzonitrile**

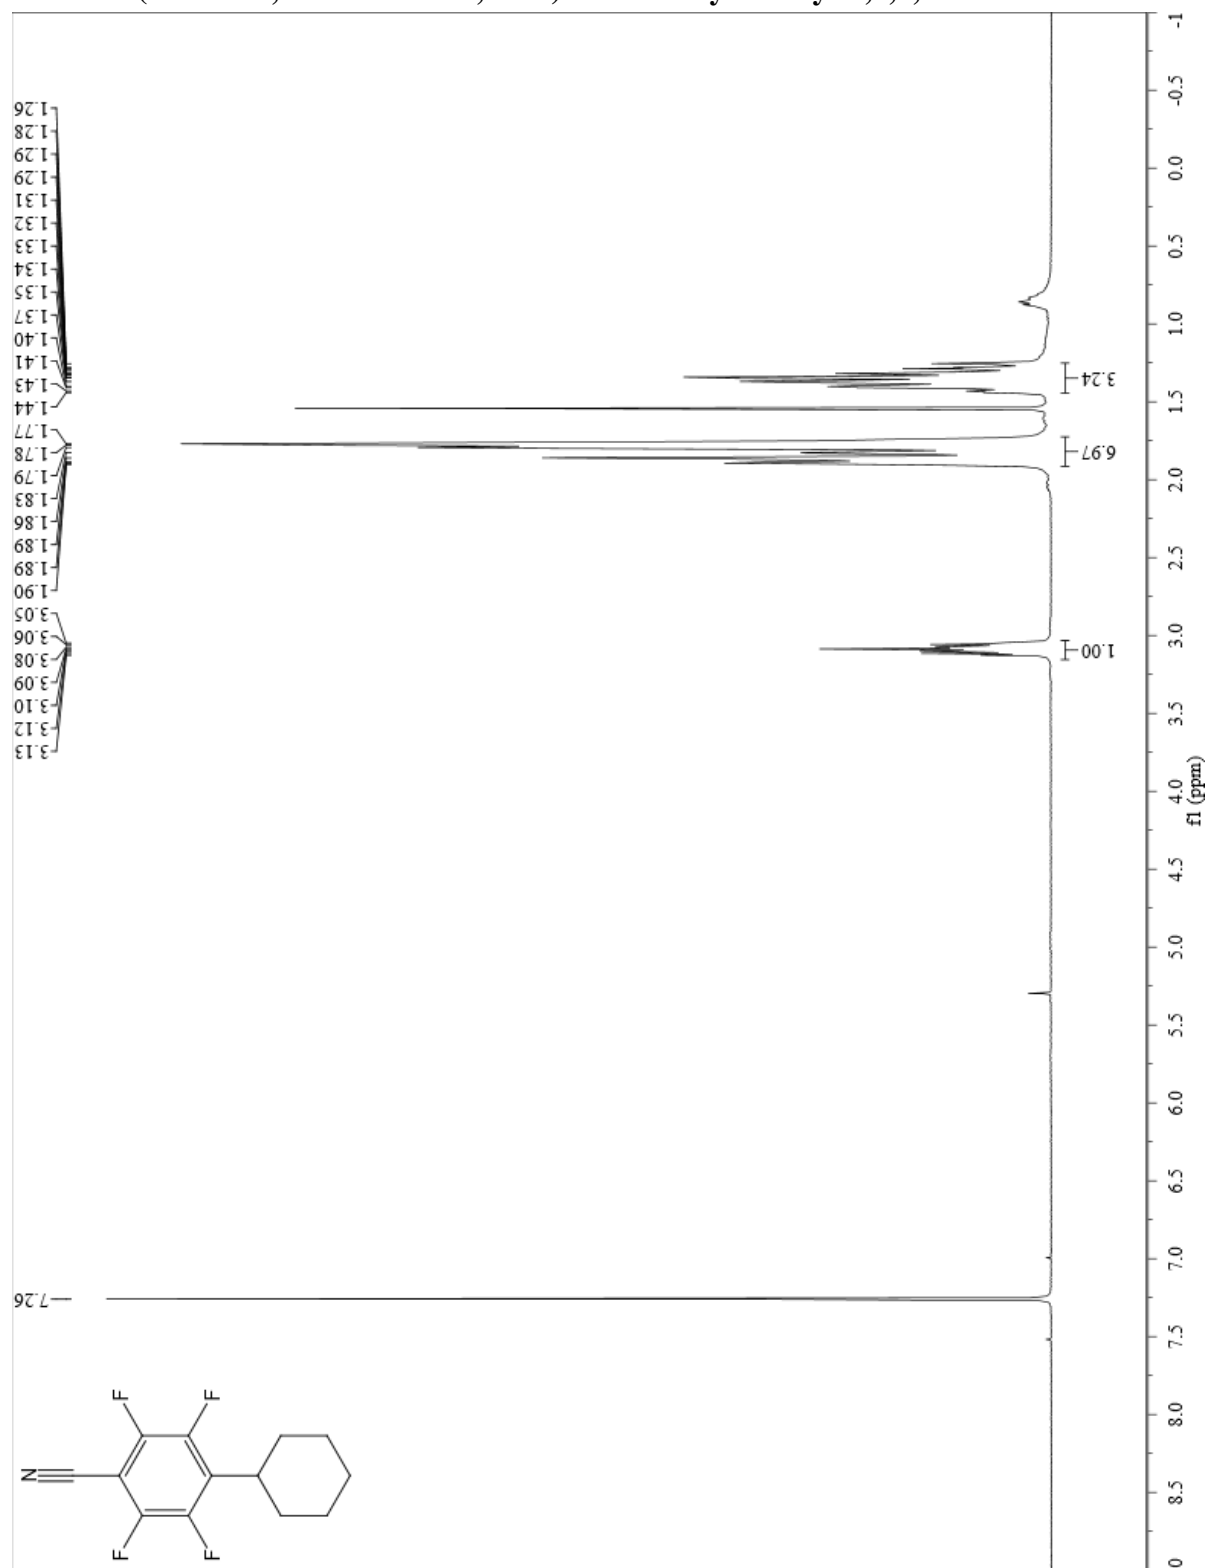



# GC and MS of S-2a 4-cyclohexyl-2,3,5,6-tetrafluorobenzonitrile

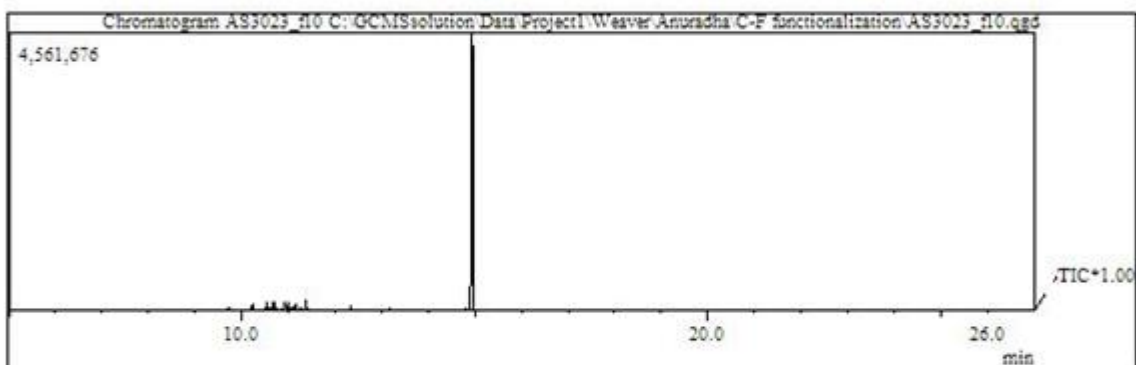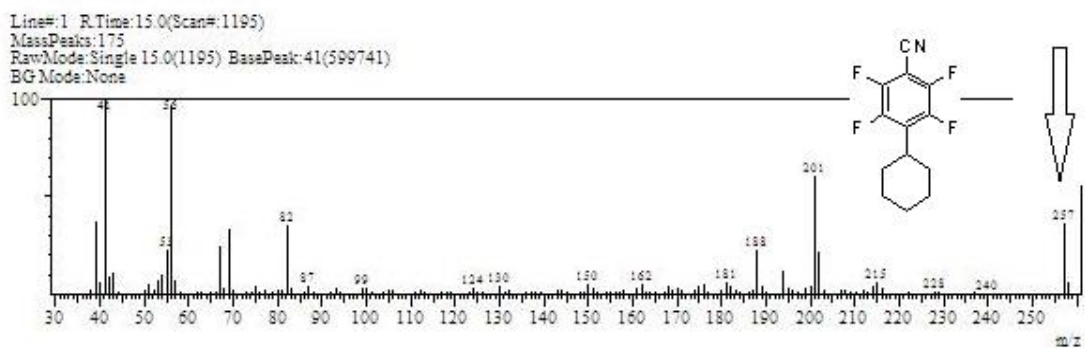

**<sup>19</sup>F NMR (376 MHz, Chloroform-*d*, @ rt) of S-3a S-(4-cyclohexyl-2,3,5,6-tetrafluorophenyl) O-ethyl carbonothioate**

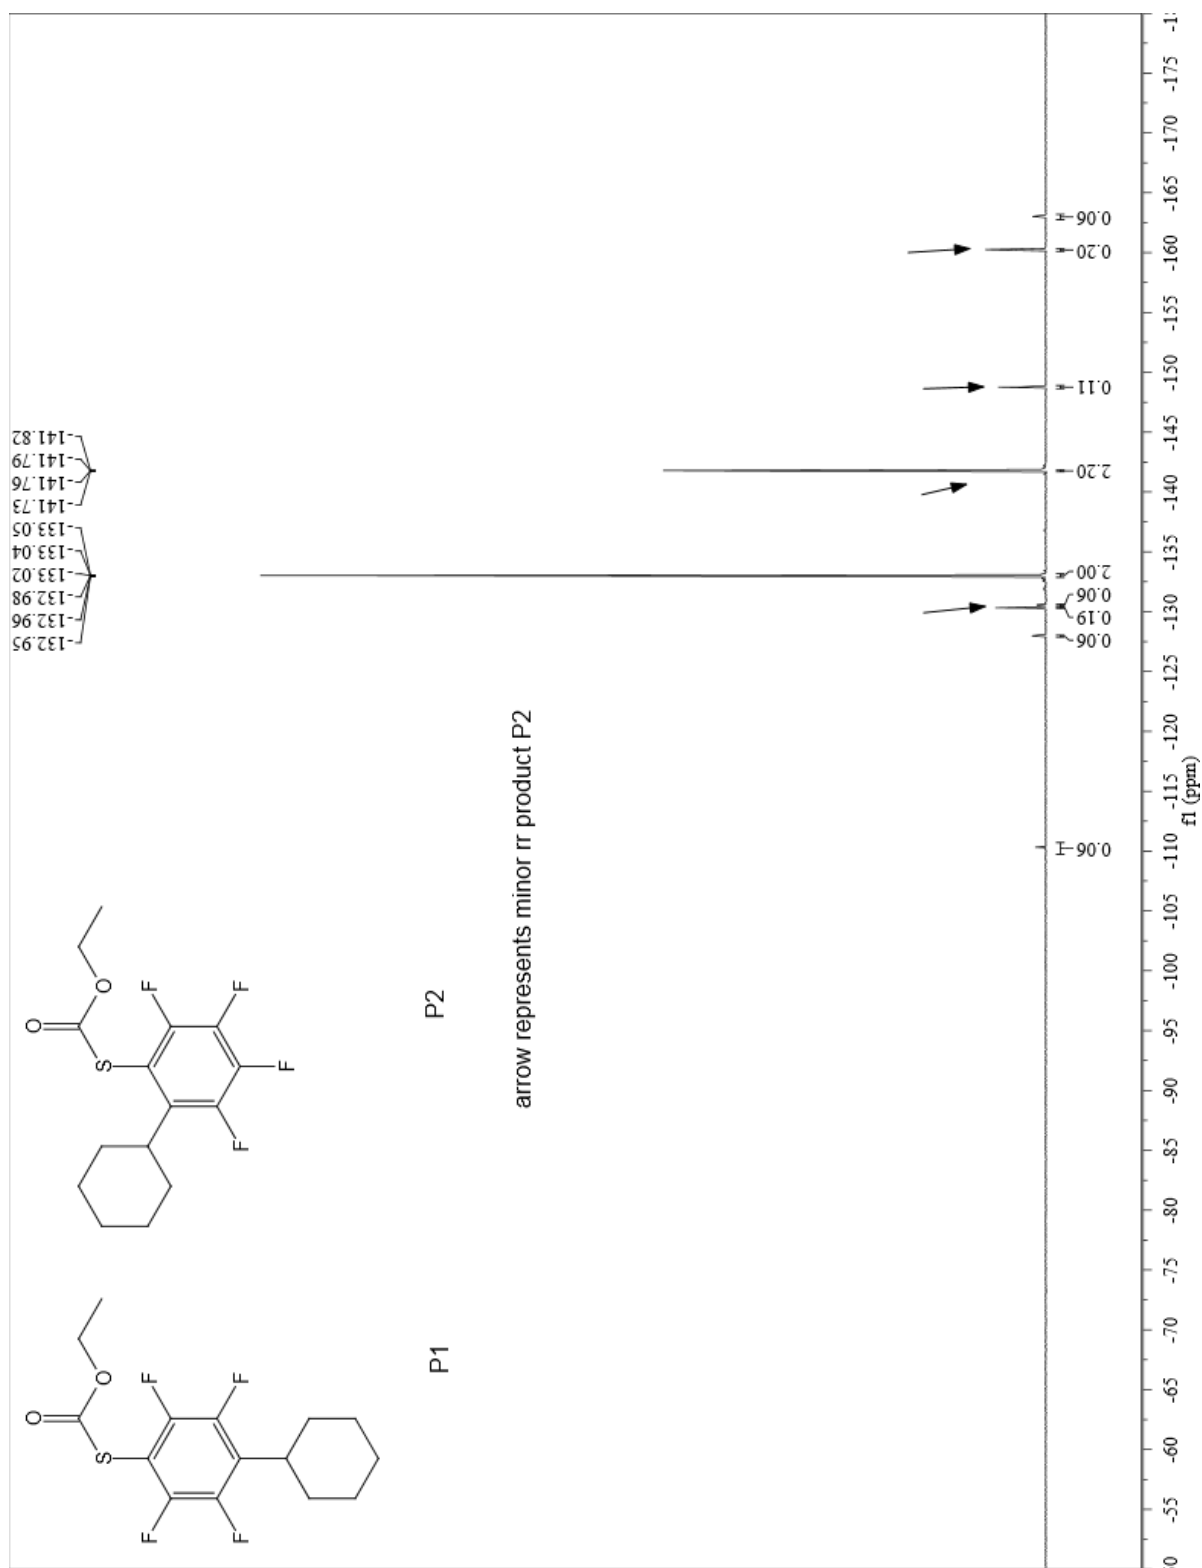

**<sup>1</sup>H NMR (400 MHz, Chloroform-*d*, @ rt) of S-3a S-(4-cyclohexyl-2,3,5,6-tetrafluorophenyl) O-ethyl carbonothioate**

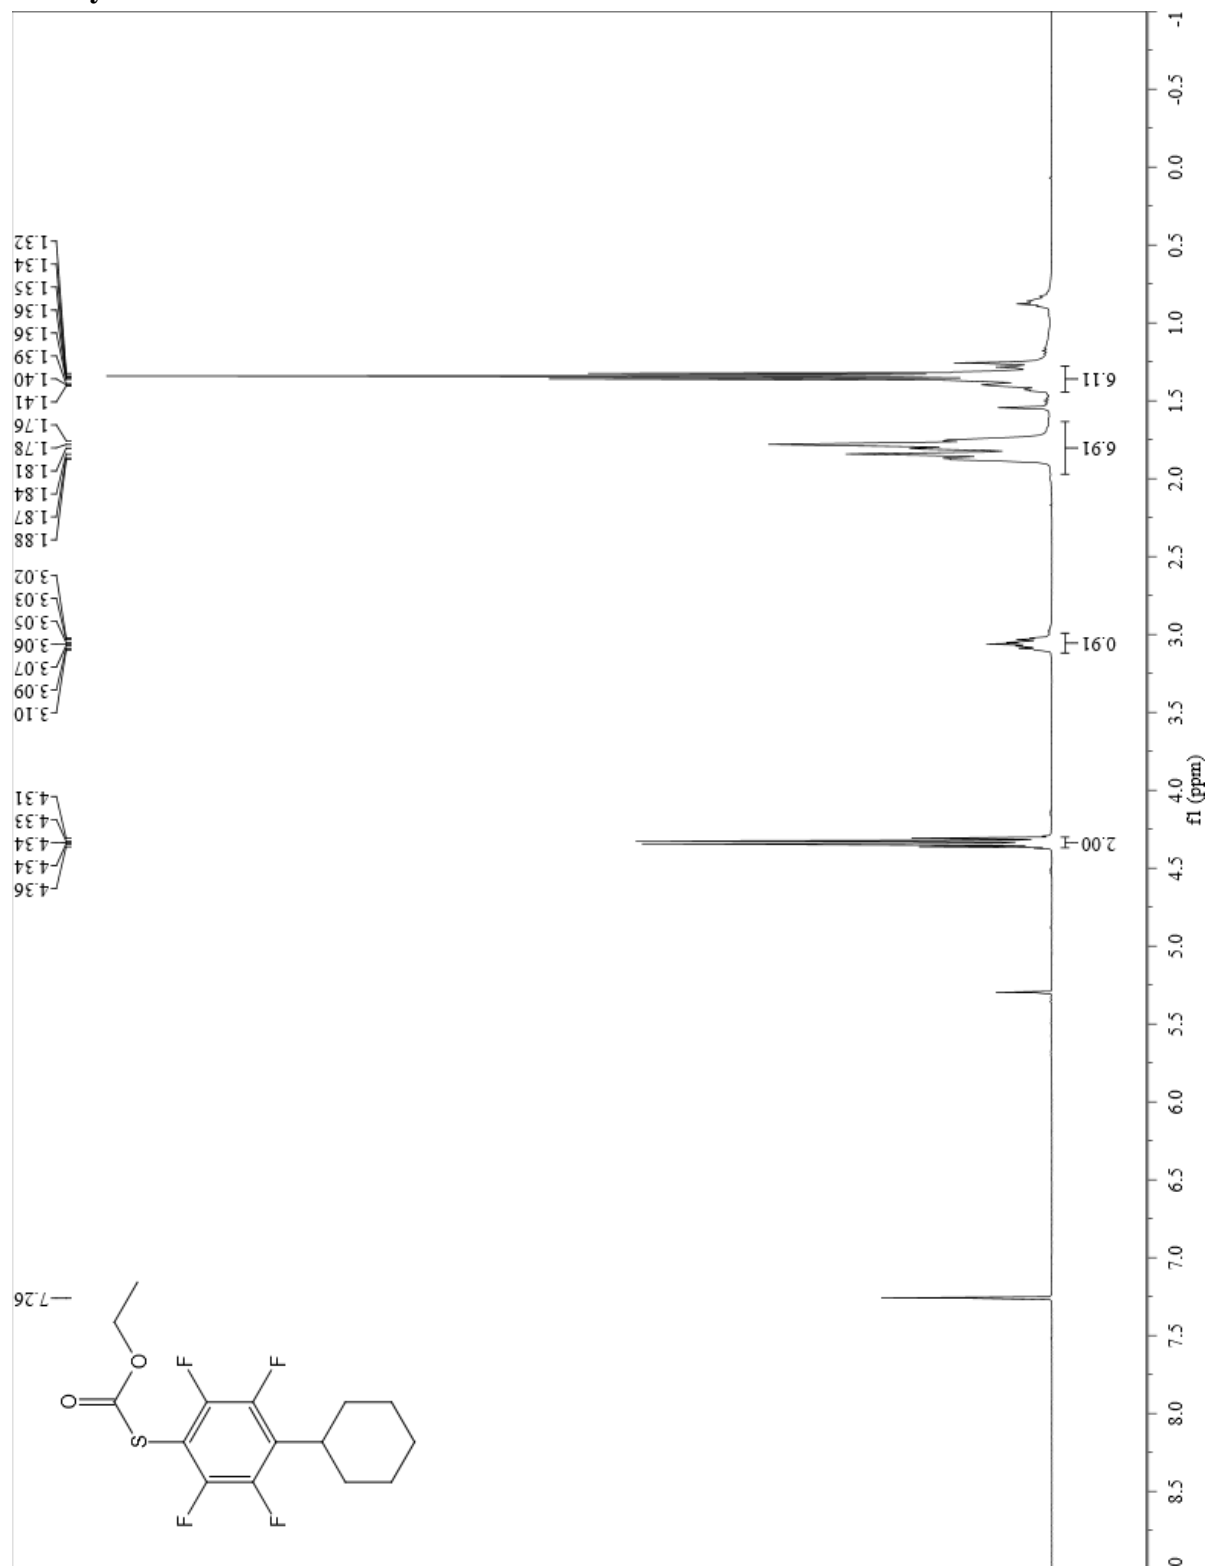

**$^{13}\text{C}\{^1\text{H}\}$  NMR (101 MHz, Chloroform-*d*, @ rt) of S-3a S-(4-cyclohexyl-2,3,5,6-tetrafluorophenyl) O-ethyl carbonothioate**

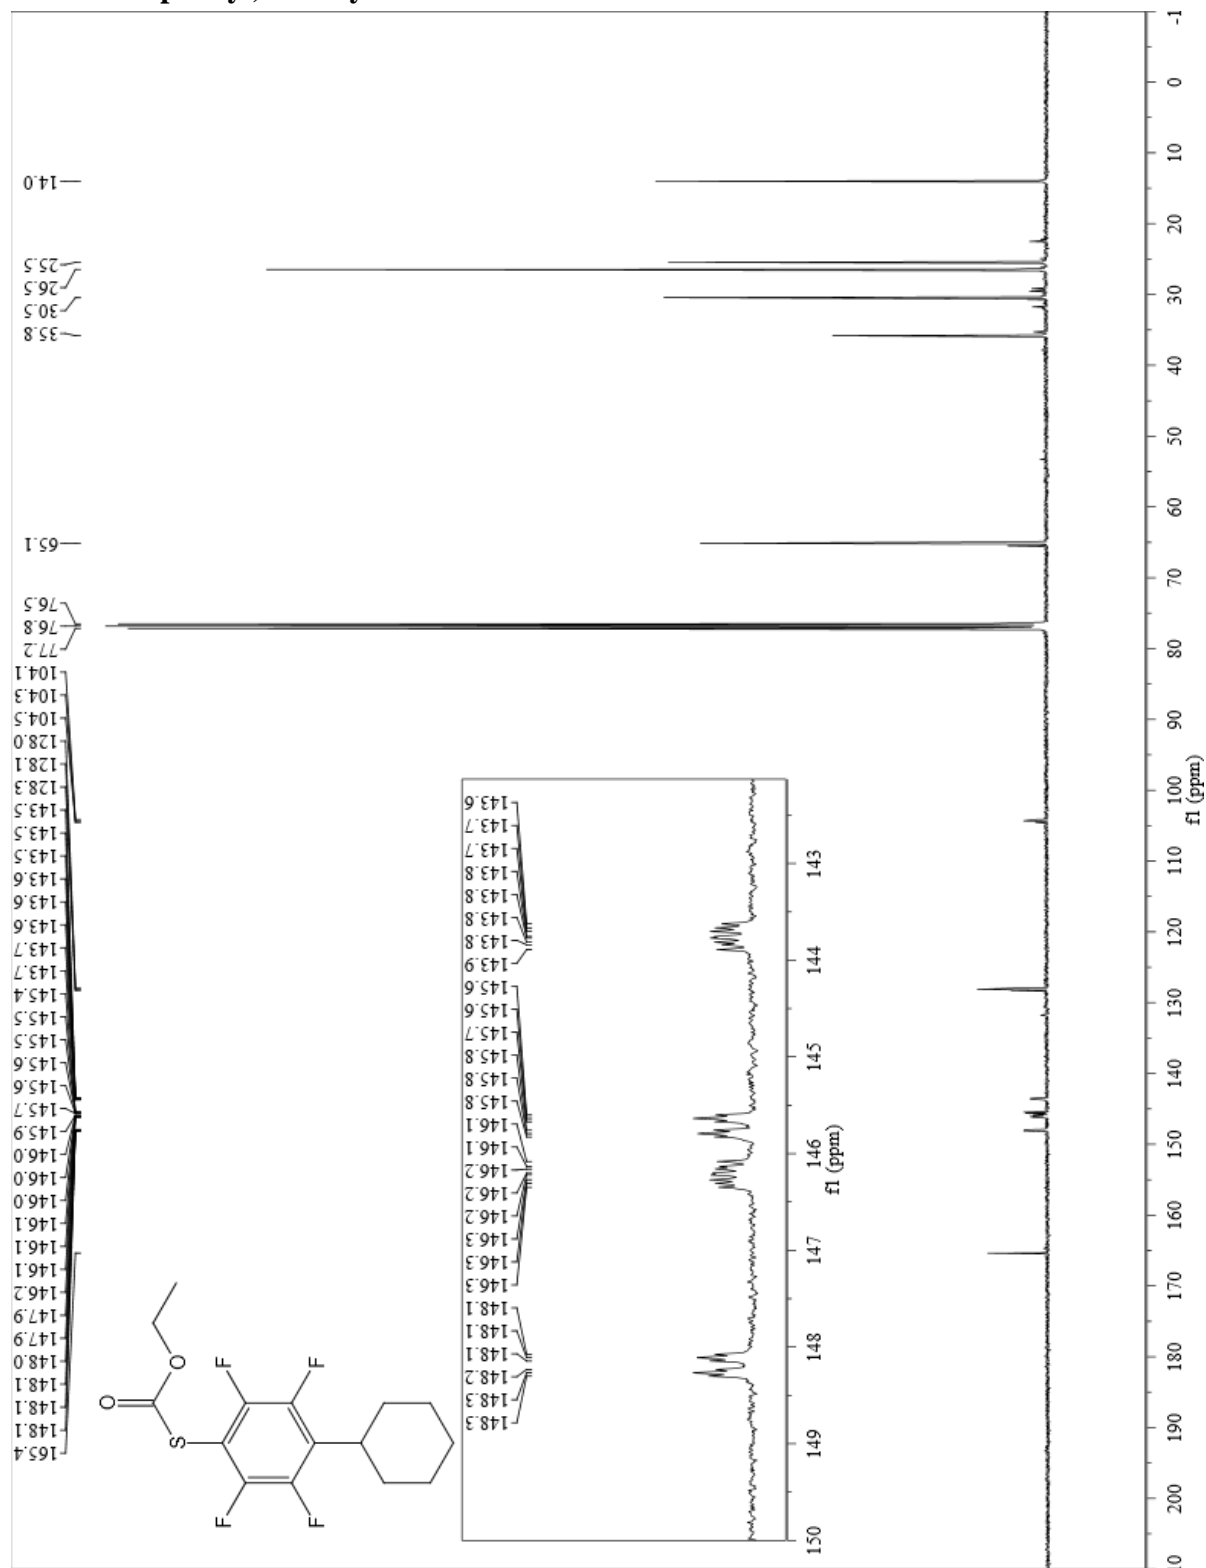



# GC and MS of S-3a S-(4-cyclohexyl-2,3,5,6-tetrafluorophenyl) O-ethyl carbonothioate

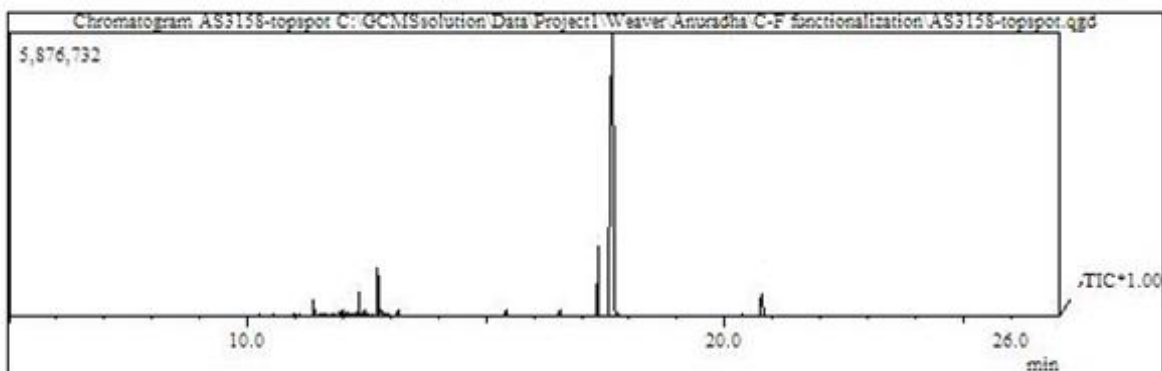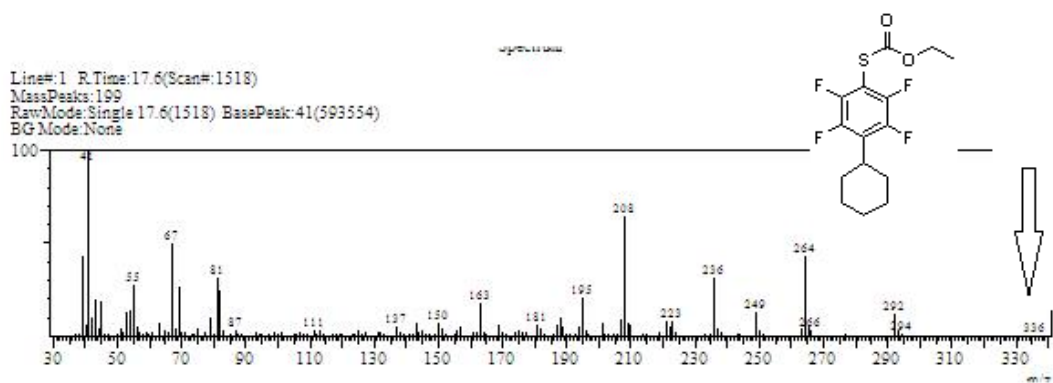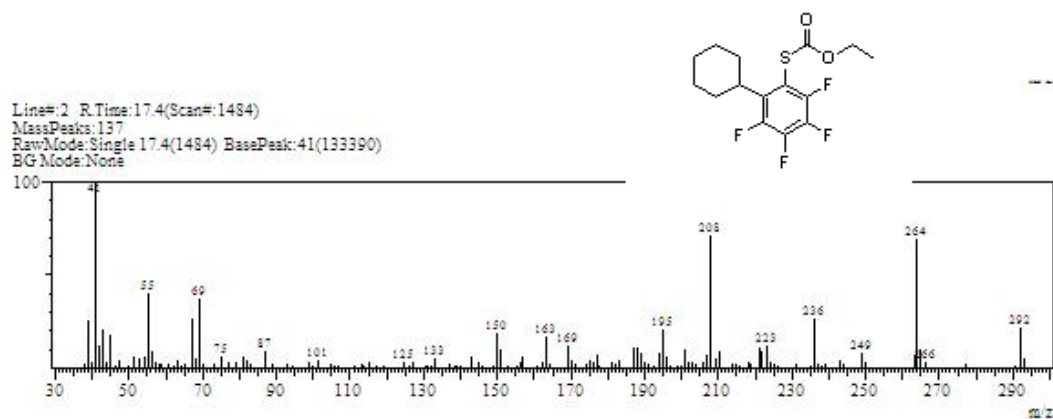

**<sup>19</sup>F NMR (376 MHz, Chloroform-*d*, @ rt) of S-4a methyl 4-cyclohexyl-2,3,5,6-tetrafluorobenzoate**

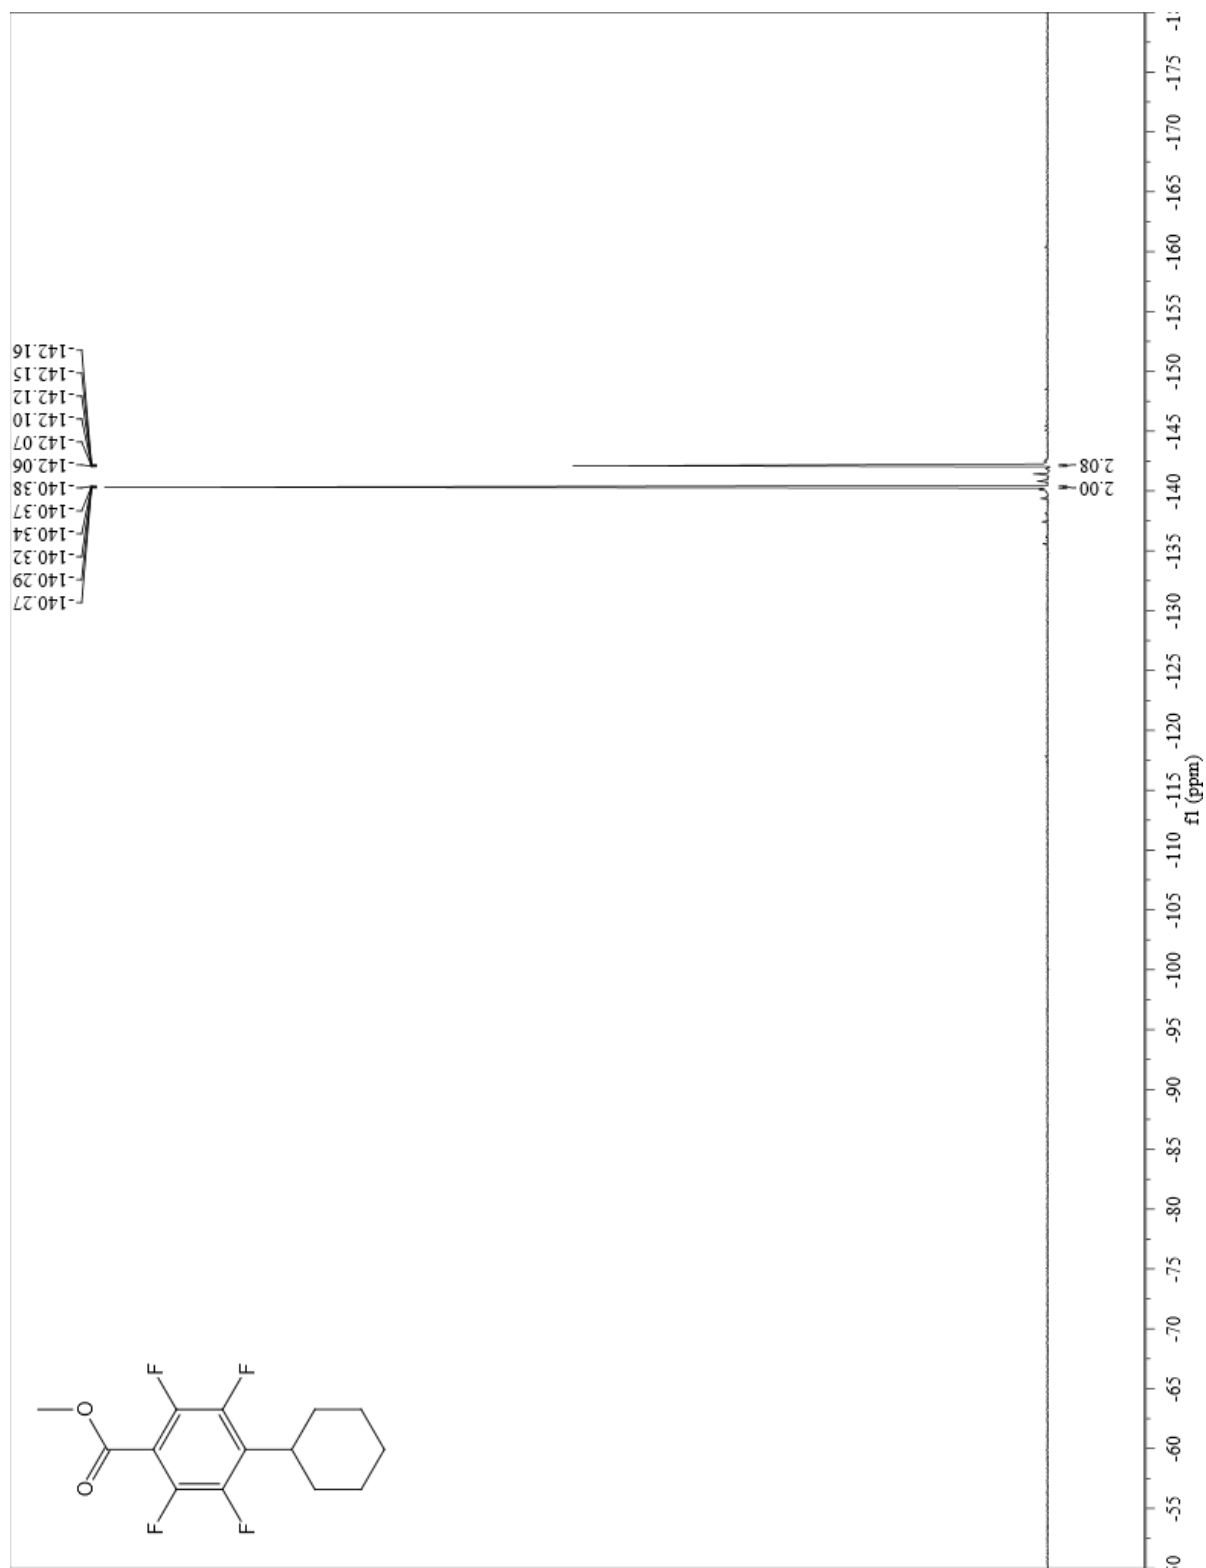

**<sup>1</sup>H NMR (400 MHz, Chloroform-*d*, @ rt) of S-4a methyl 4-cyclohexyl-2,3,5,6-tetrafluorobenzoate**

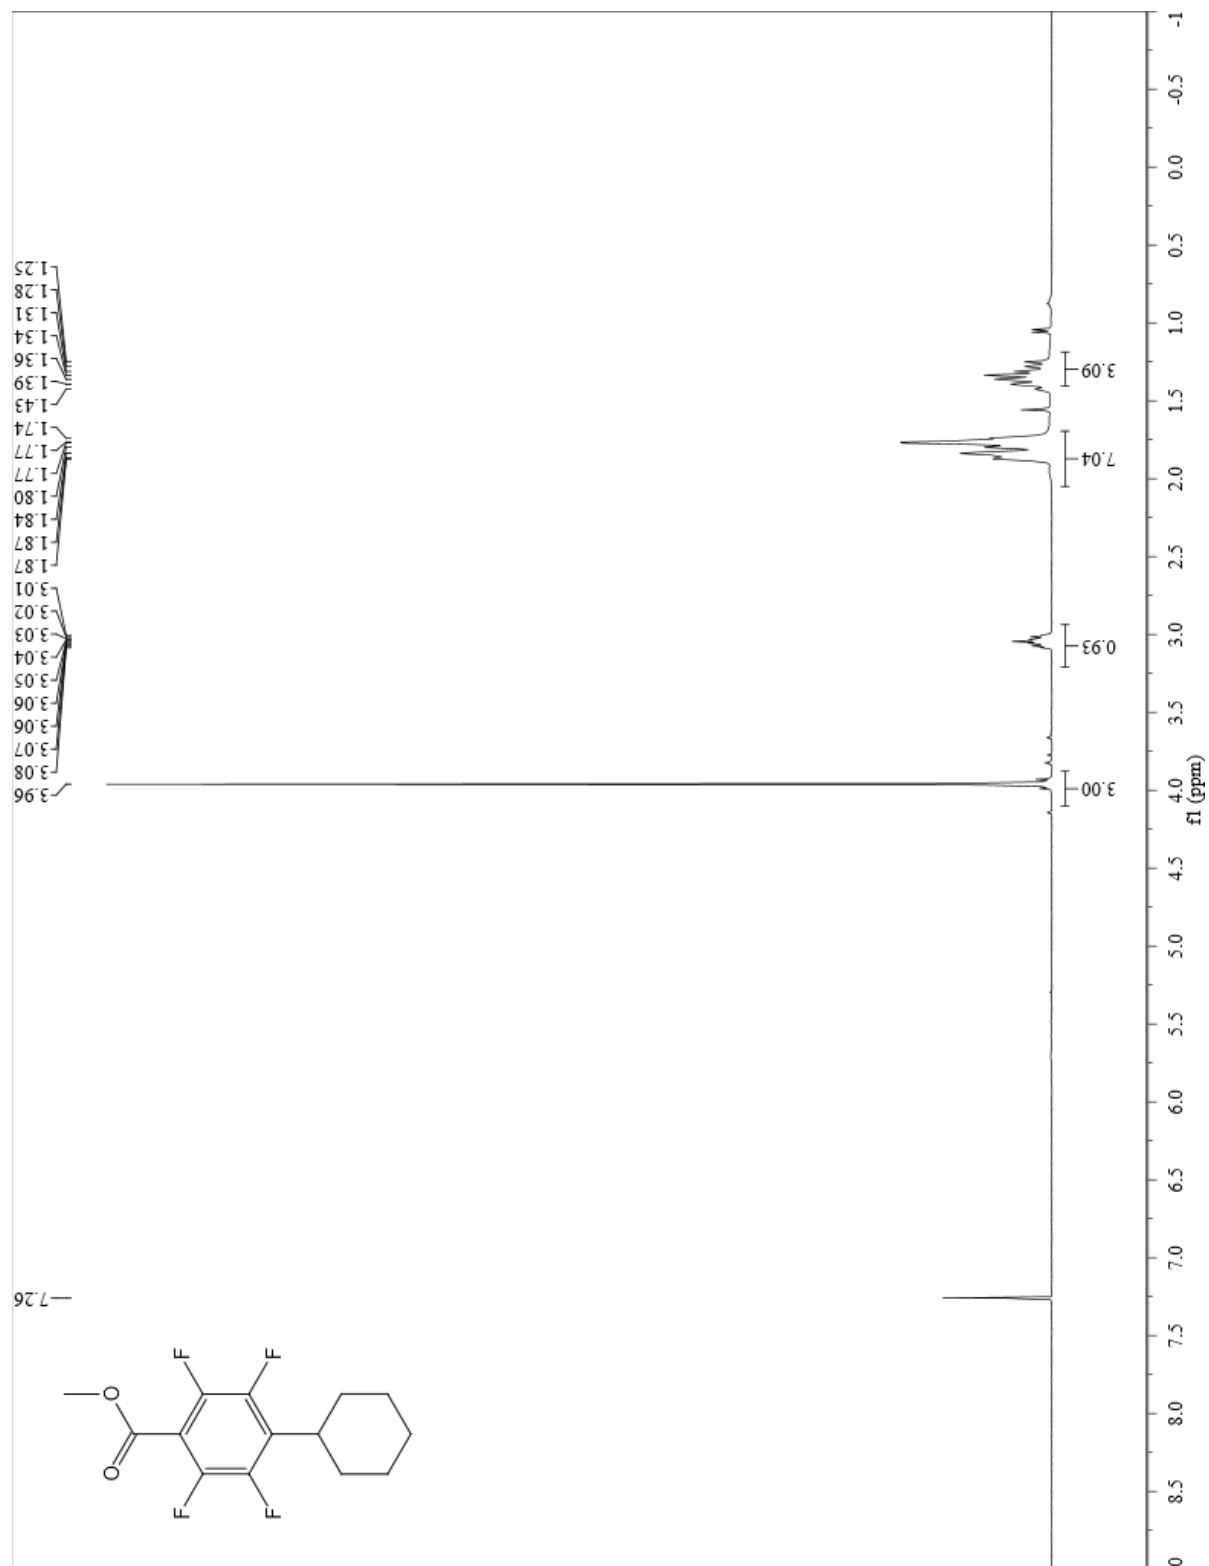

**$^{13}\text{C}\{^1\text{H}\}$  NMR (101 MHz, Chloroform-*d*, @ rt) of S-4a methyl 4-cyclohexyl-2,3,5,6-tetrafluorobenzoate**

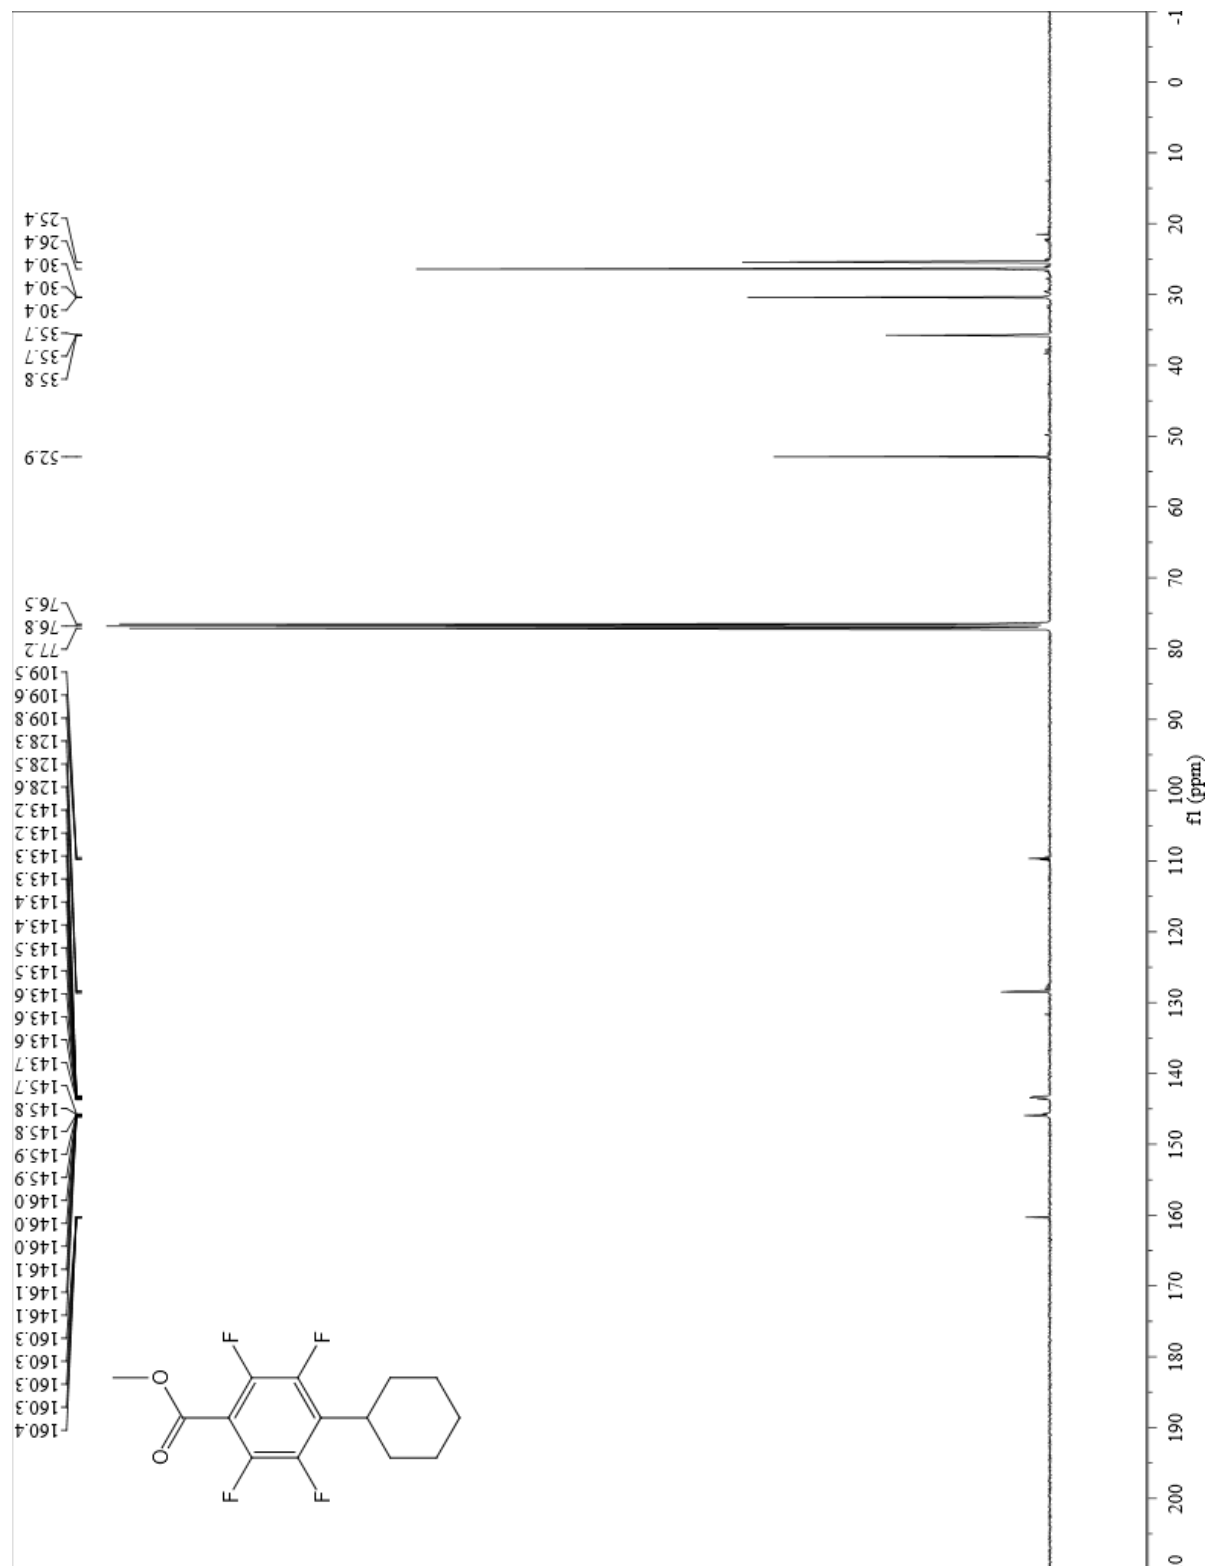

# GC and MS of S-4a methyl 4-cyclohexyl-2,3,5,6-tetrafluorobenzoate

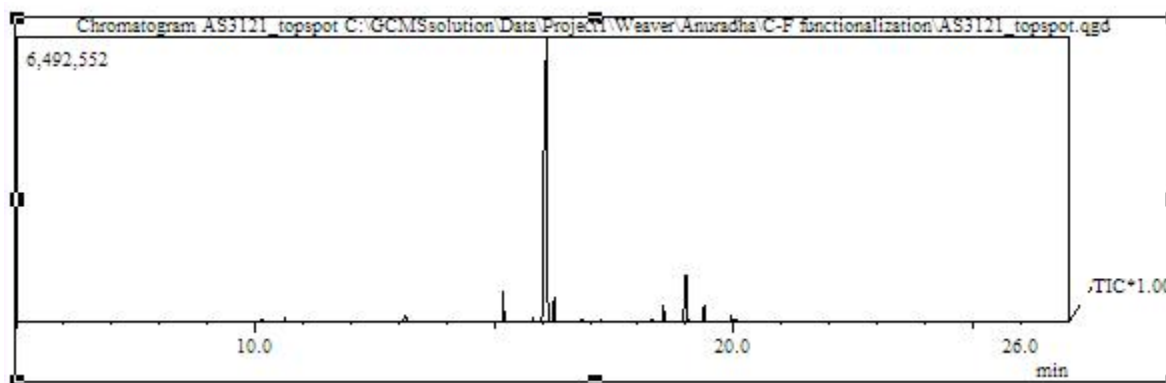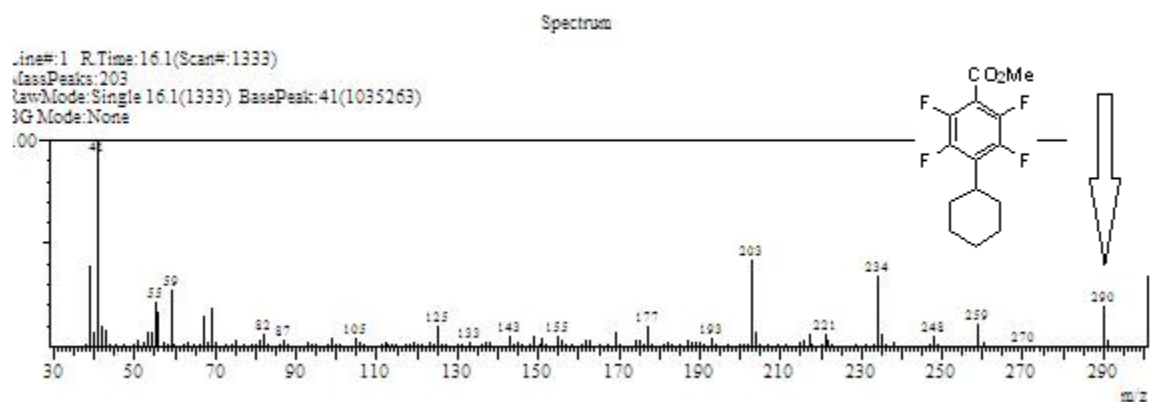

**<sup>19</sup>F NMR (376 MHz, Chloroform-*d*, @ rt) of S-5a 2-(4-cyclohexyl-2,3,5,6-tetrafluorophenyl)benzo[d]oxazole**

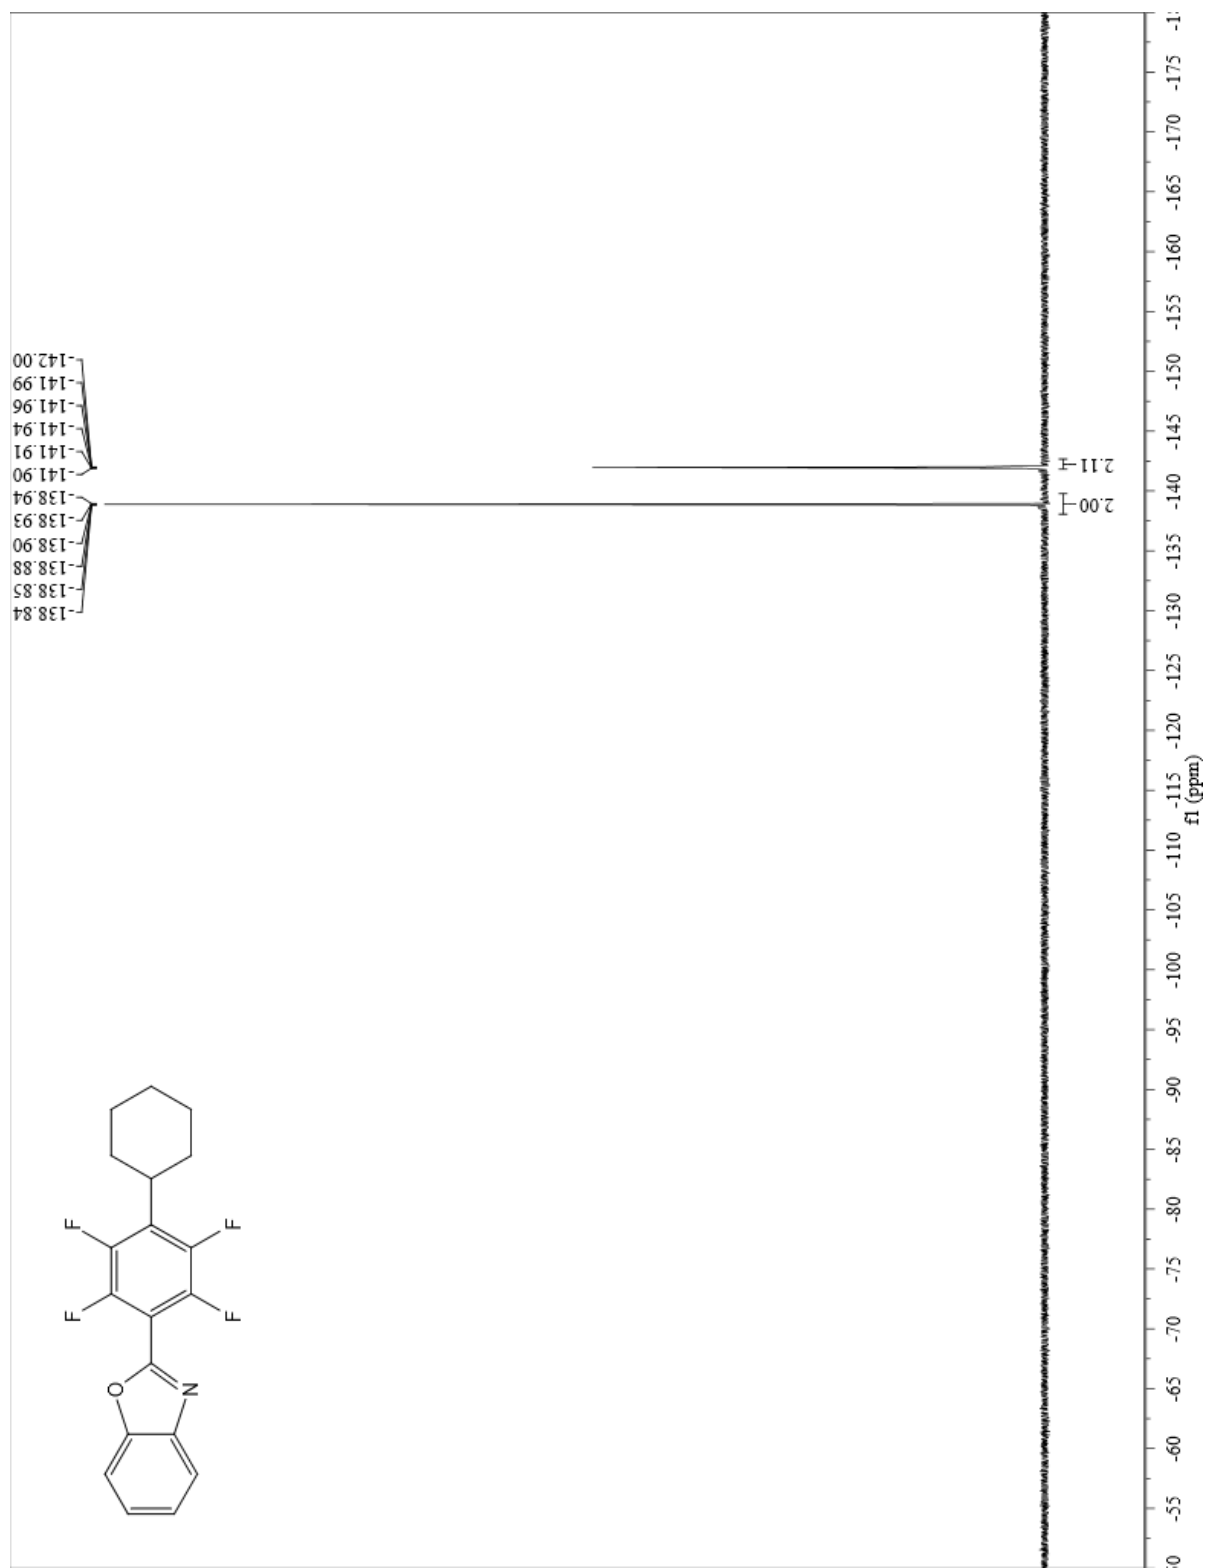

**<sup>1</sup>H NMR (400 MHz, Chloroform-*d*, @ rt) of S-5a 2-(4-cyclohexyl-2,3,5,6-tetrafluorophenyl)benzo[d]oxazole**

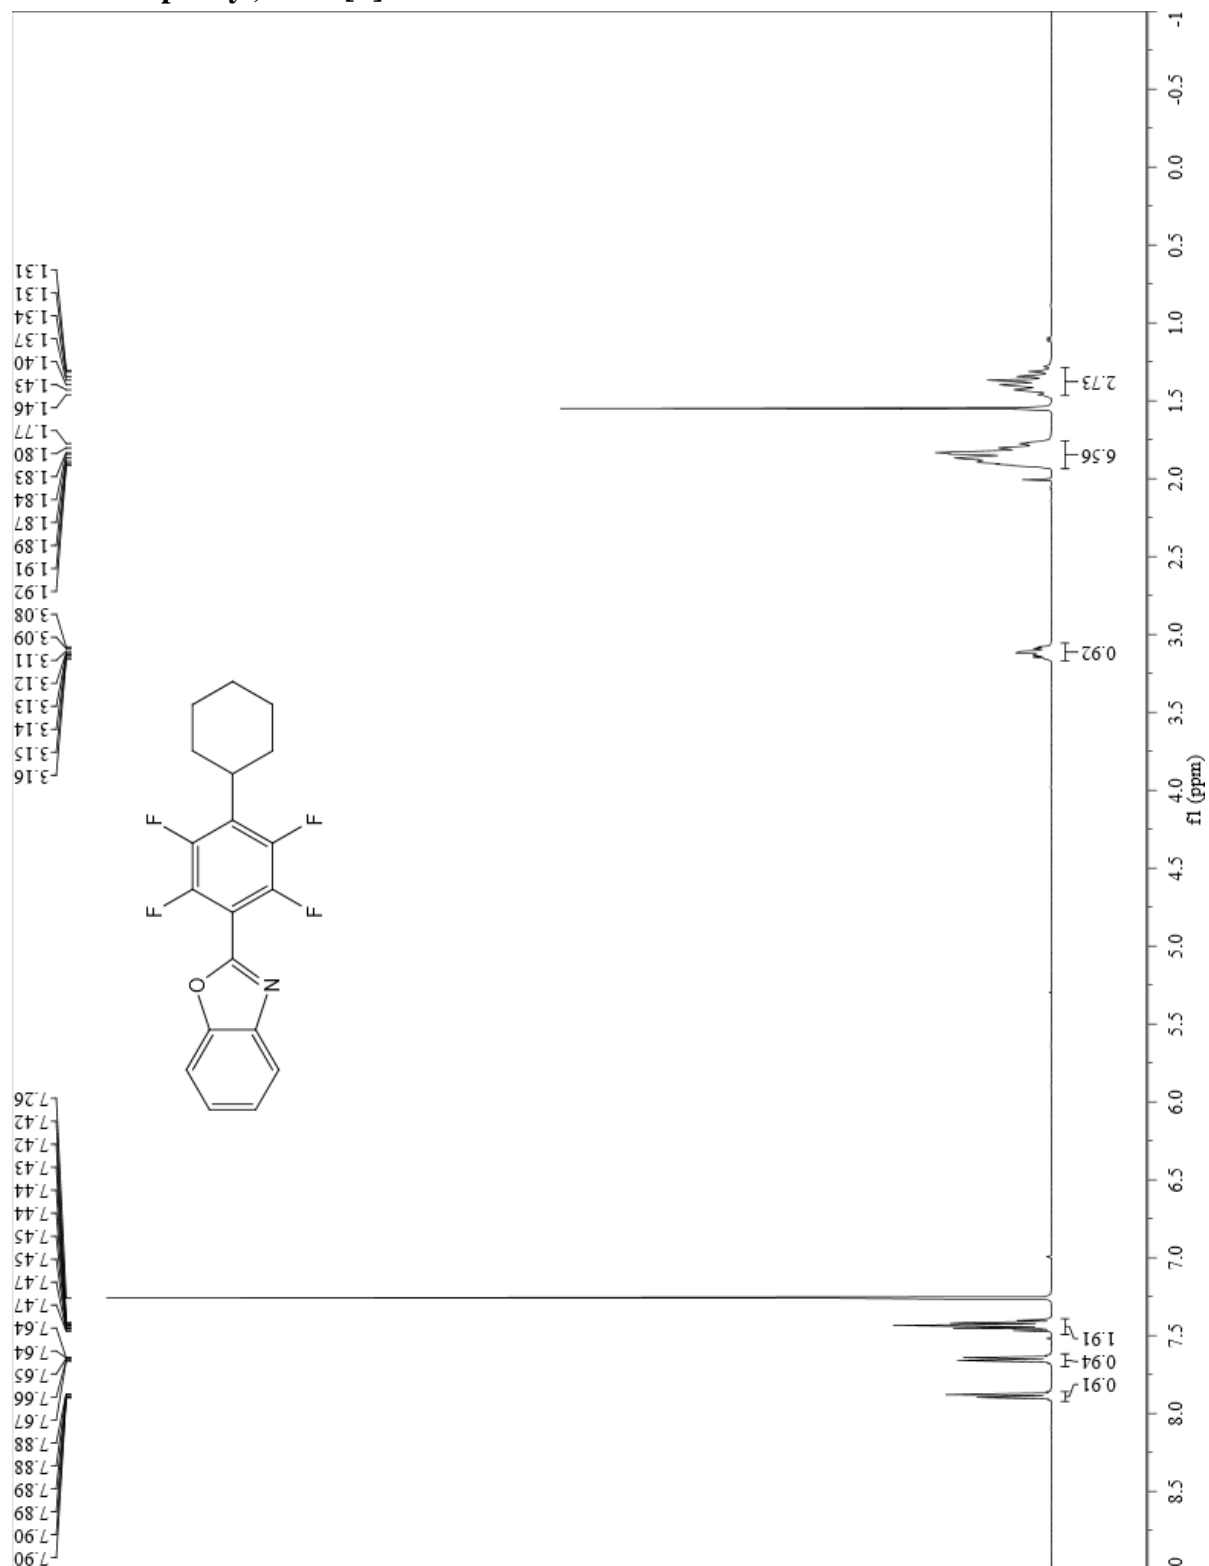

**$^{13}\text{C}\{^1\text{H}\}$  NMR (101 MHz, Chloroform-*d*, @ rt) of S-5a 2-(4-cyclohexyl-2,3,5,6-tetrafluorophenyl)benzo[d]oxazole**

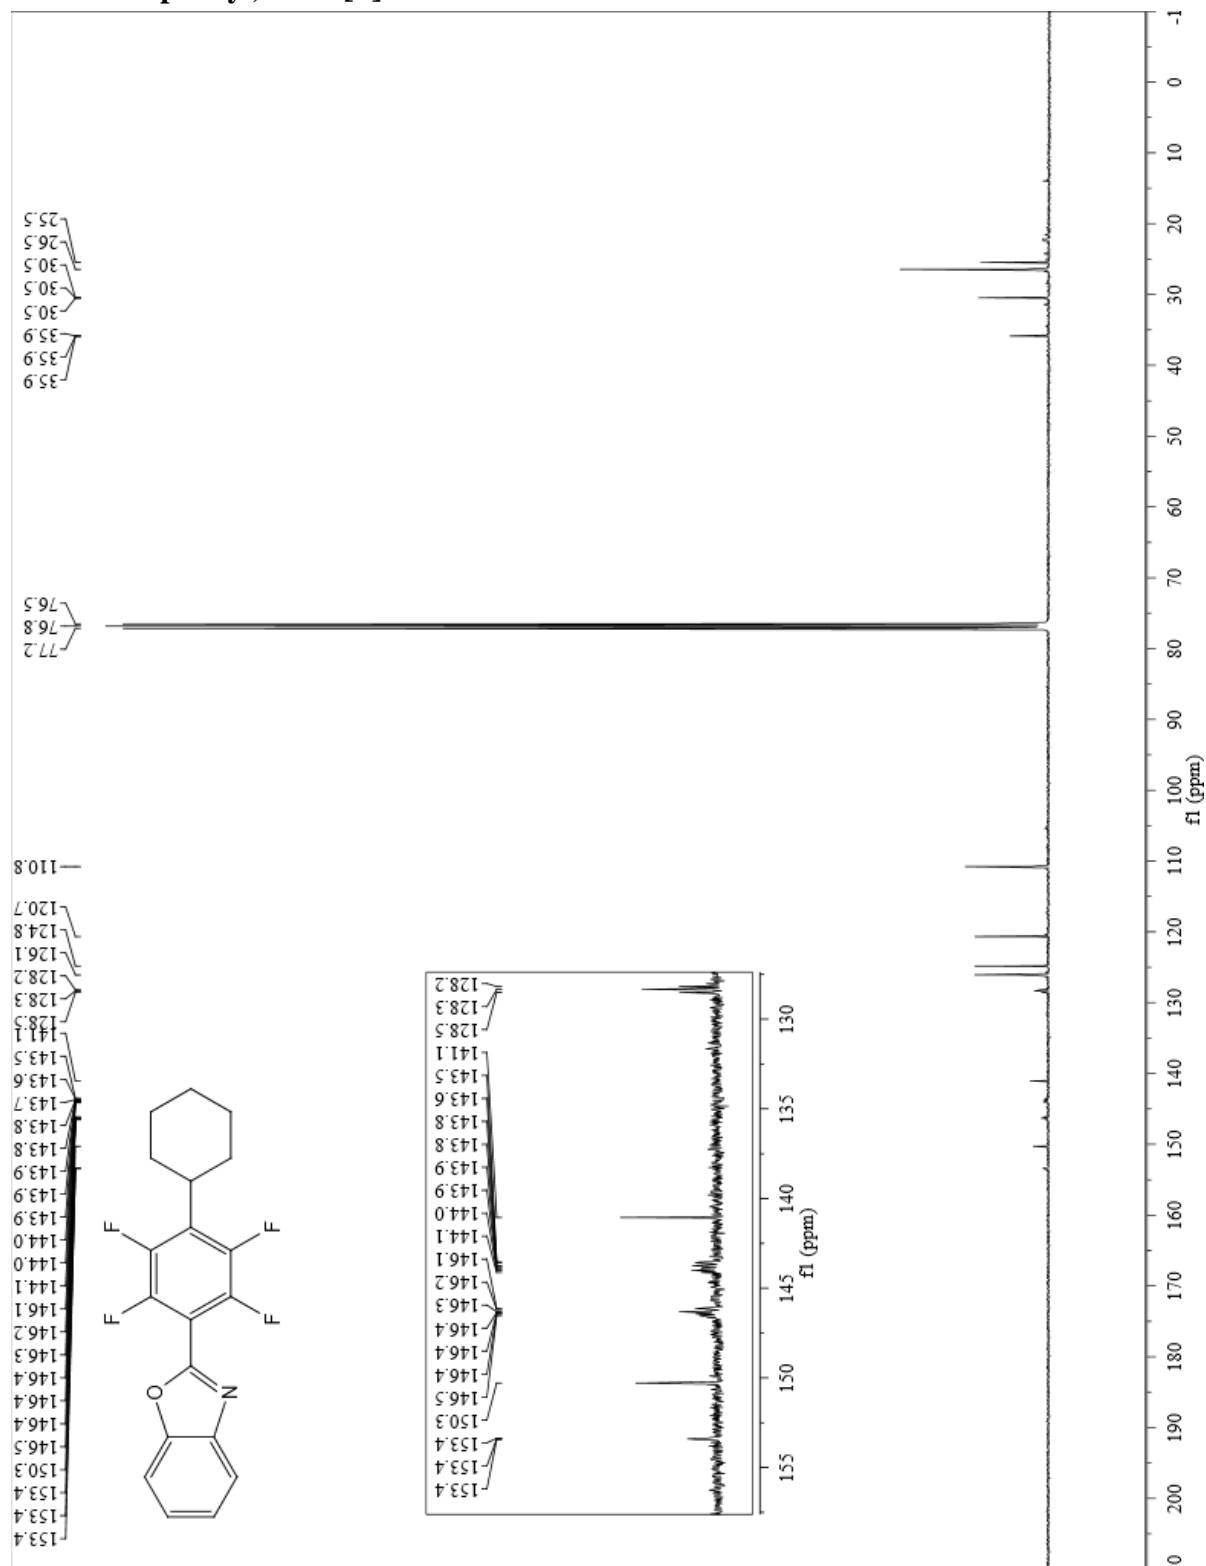



# GC and MS of S-5a 2-(4-cyclohexyl-2,3,5,6-tetrafluorophenyl)benzo[d]oxazole

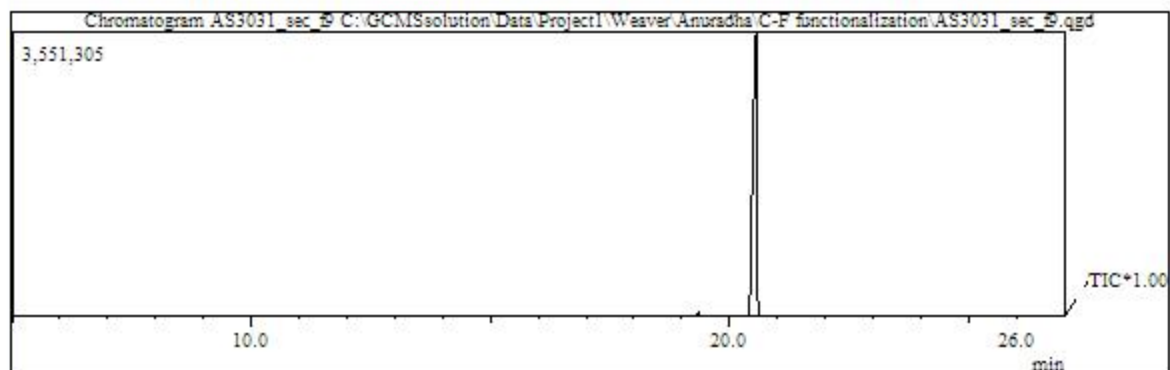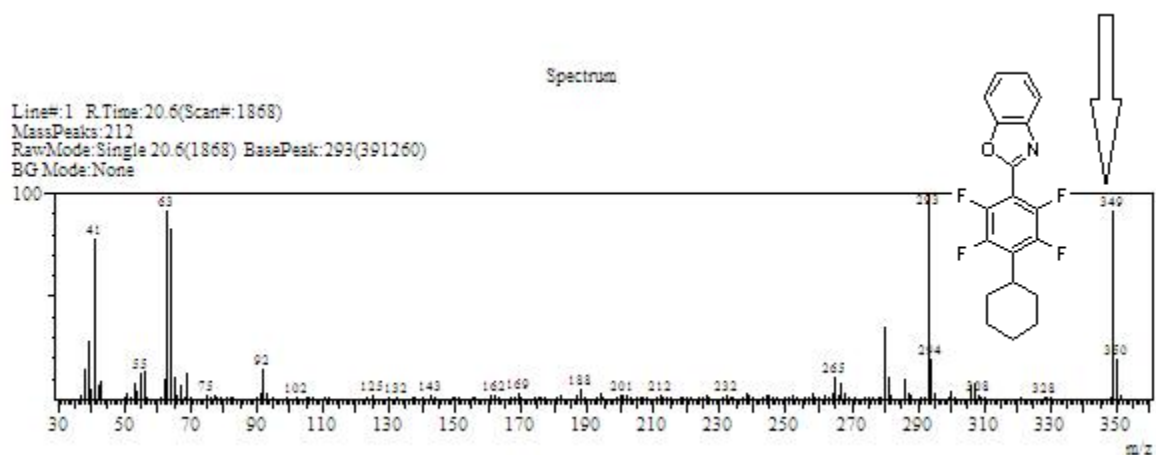

**<sup>19</sup>F NMR (376 MHz, Chloroform-*d*, @ rt) of S-6a (4-cyclohexyl-2,3,5,6-tetrafluorophenyl)diphenylphosphine**

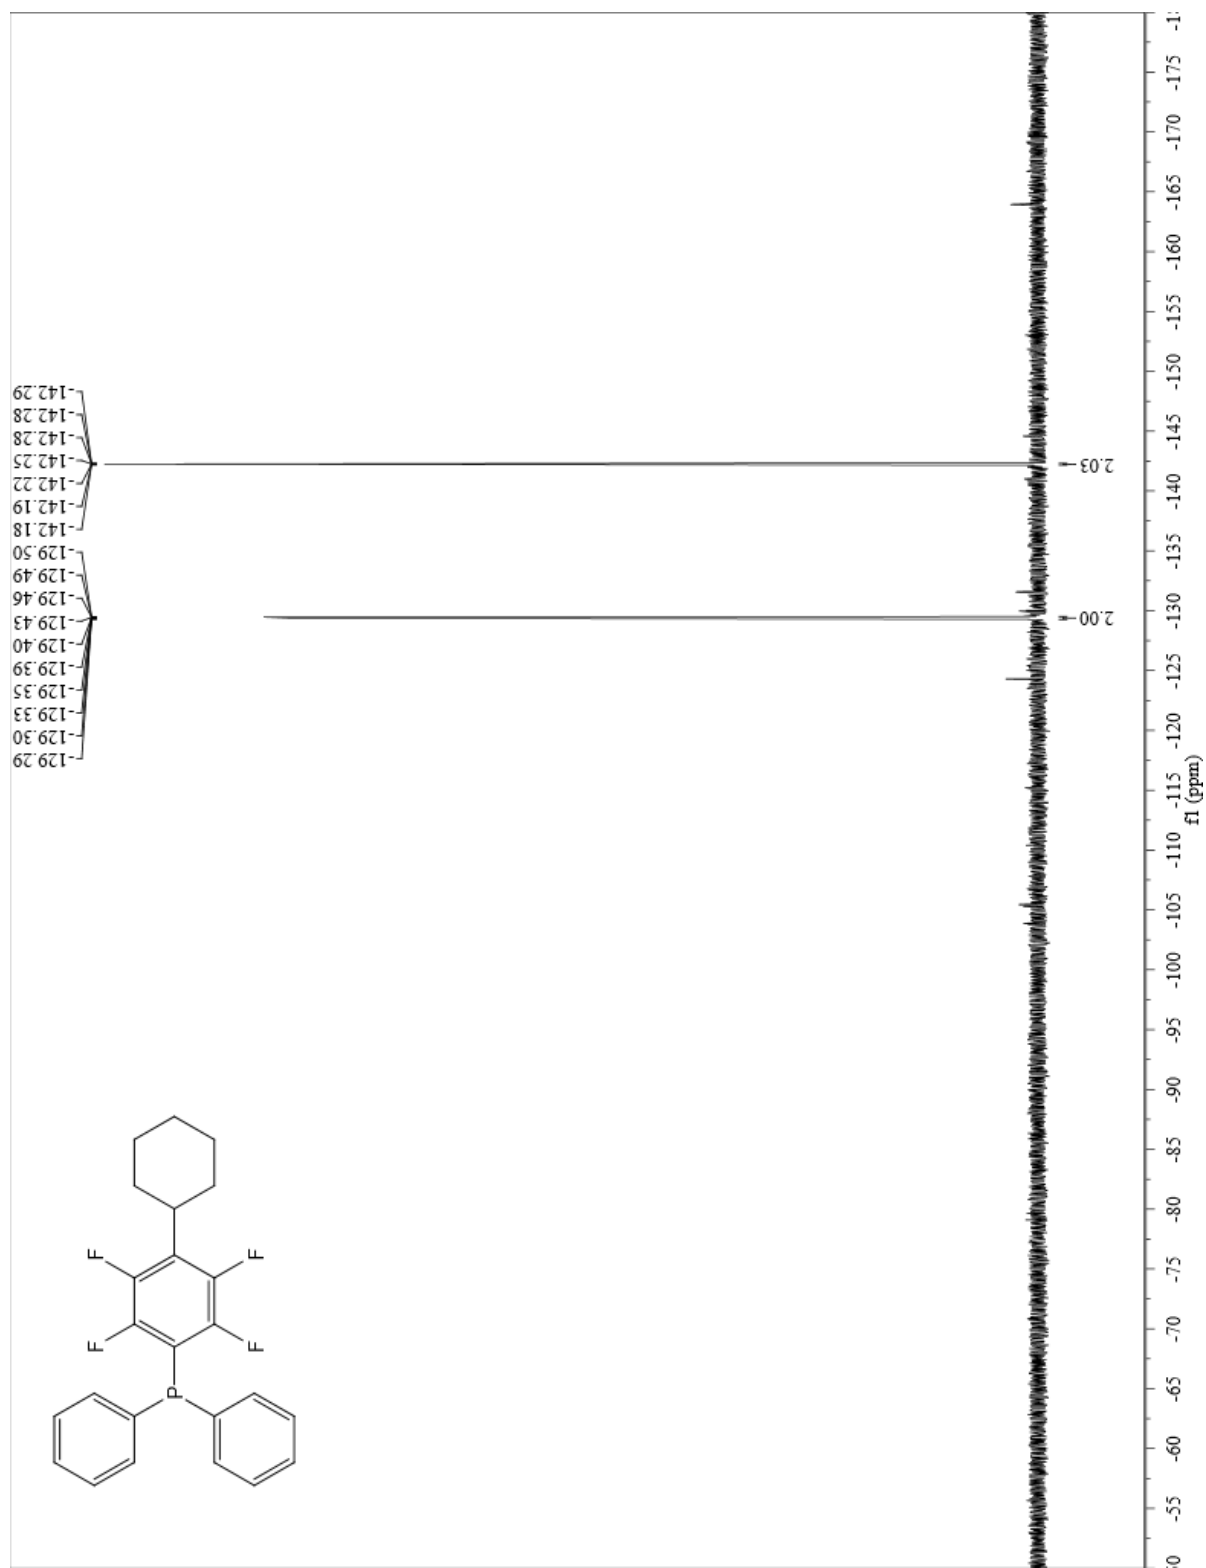

**<sup>1</sup>H NMR (400 MHz, Chloroform-*d*, @ rt) of S-6a (4-cyclohexyl-2,3,5,6-tetrafluorophenyl)diphenylphosphine**

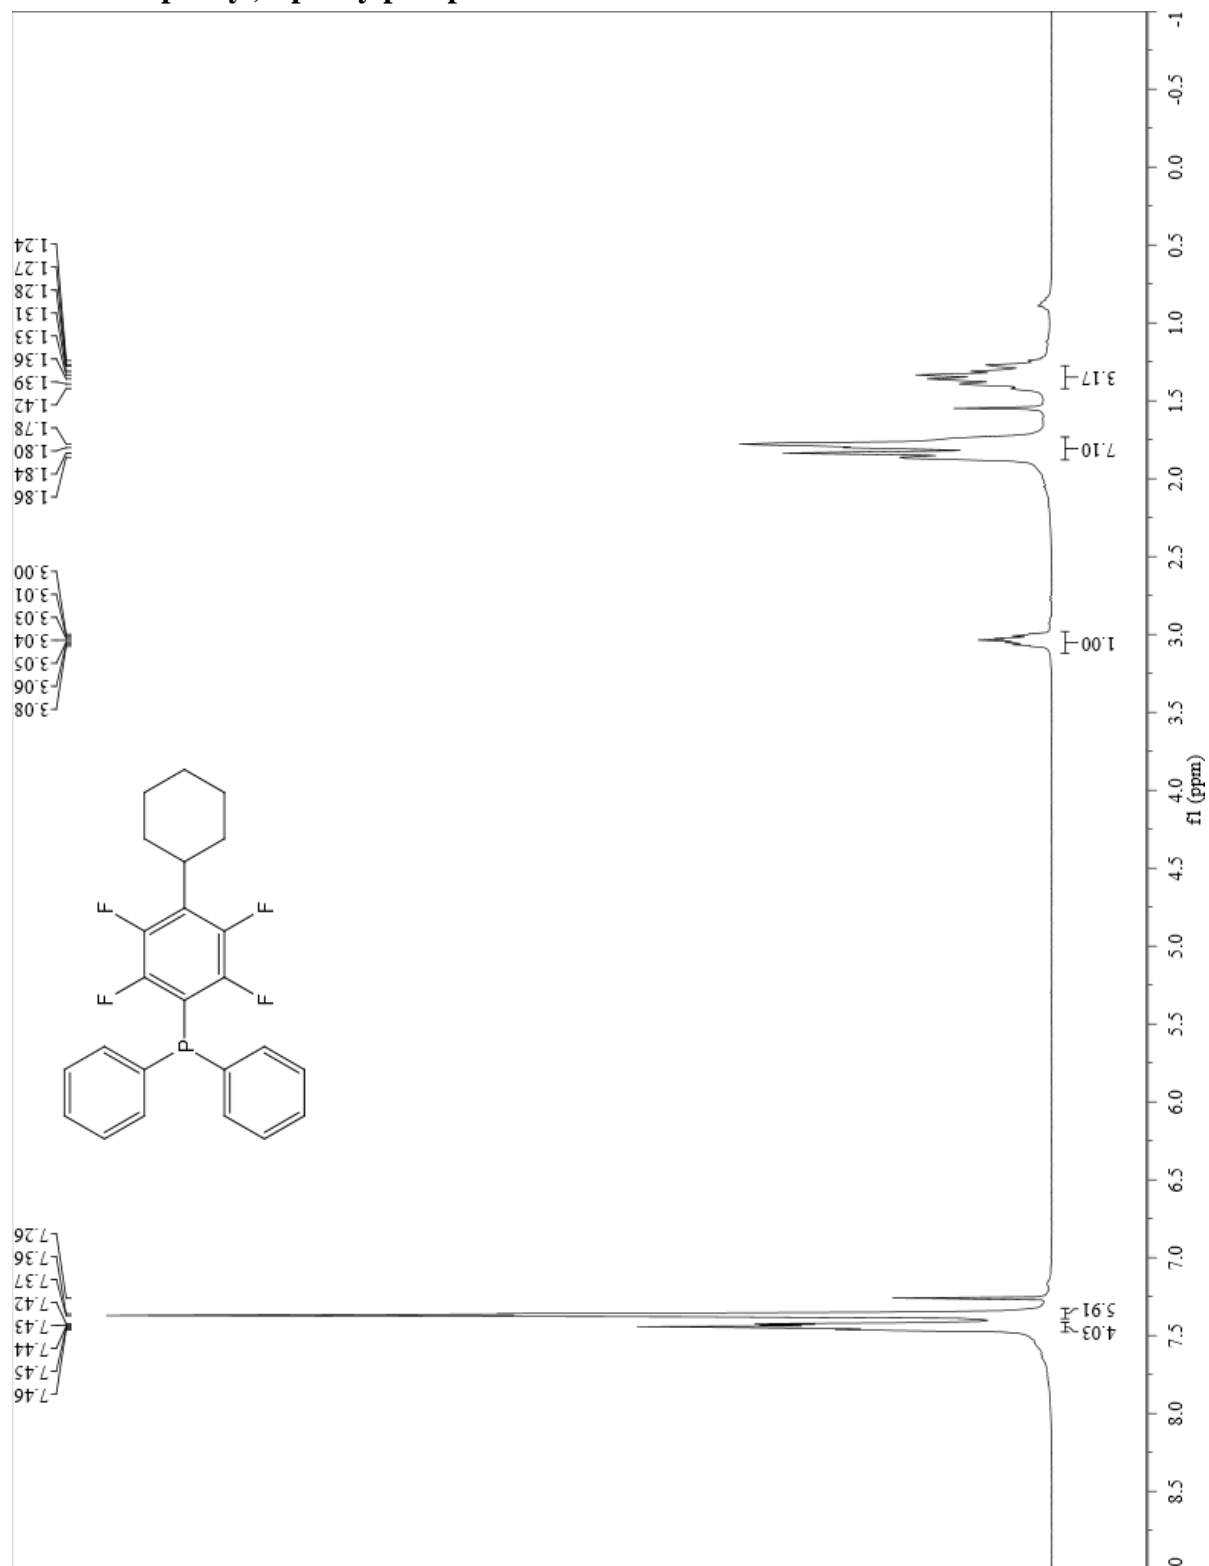

**$^{13}\text{C}\{^1\text{H}\}$  NMR (101 MHz, Chloroform-*d*, @ rt) of S-6a (4-cyclohexyl-2,3,5,6-tetrafluorophenyl)diphenylphosphine**

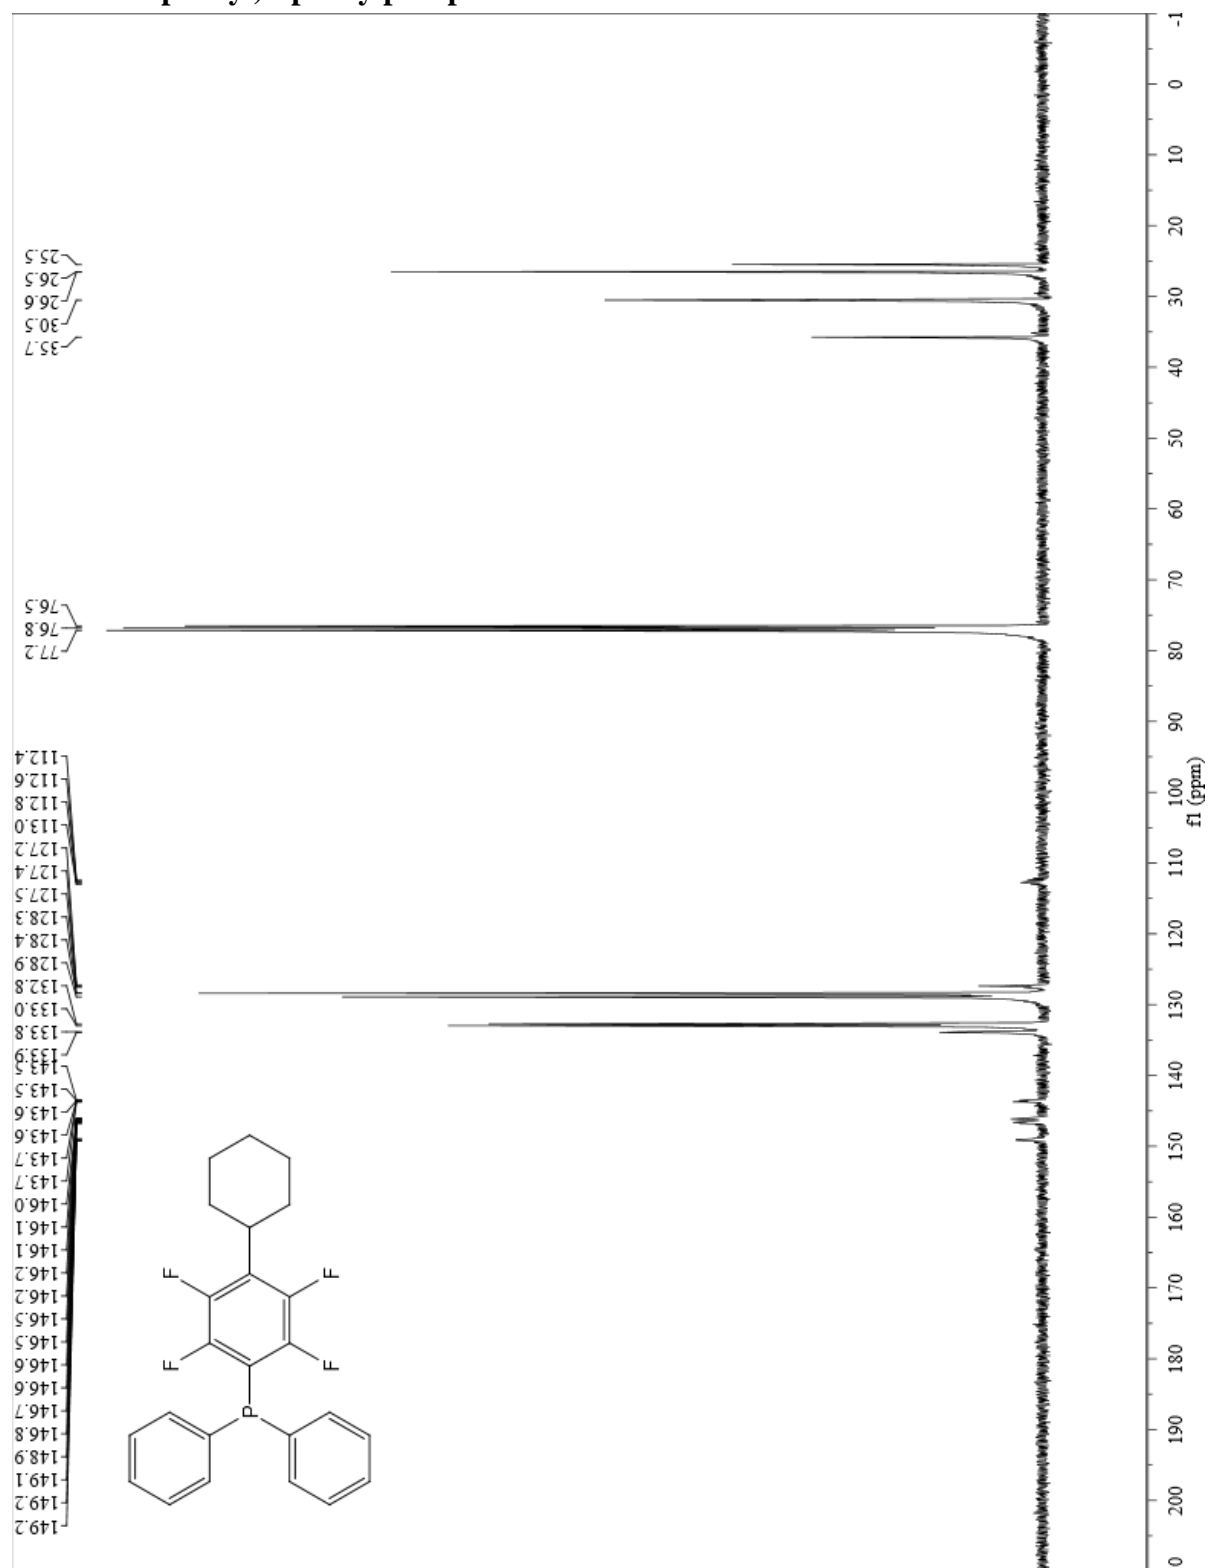

# GC and MS of S-6a (4-cyclohexyl-2,3,5,6-tetrafluorophenyl)diphenylphosphine

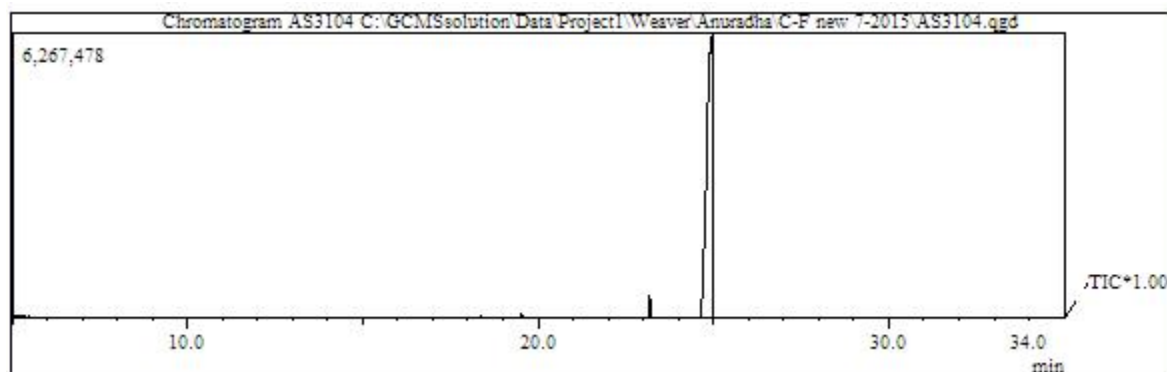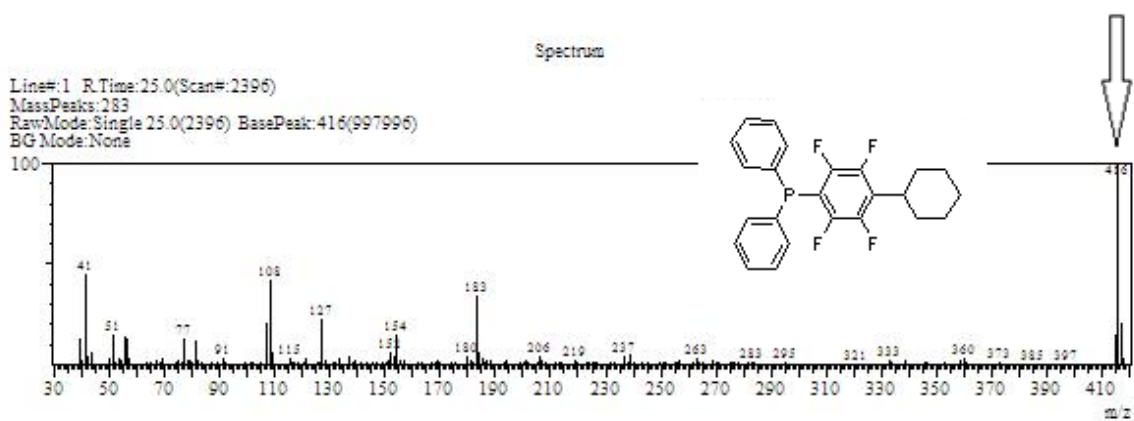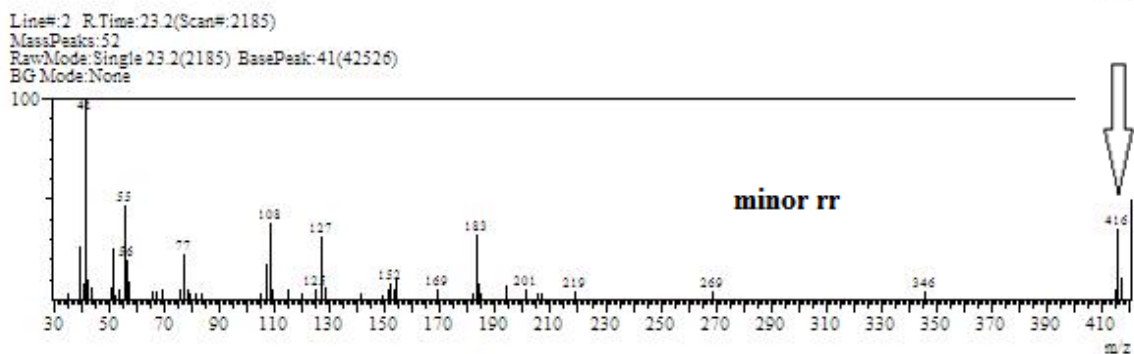

**<sup>19</sup>F NMR (376 MHz, Chloroform-*d*, @ rt) of S-7a 2,3,5,6-tetrafluoro-4-**

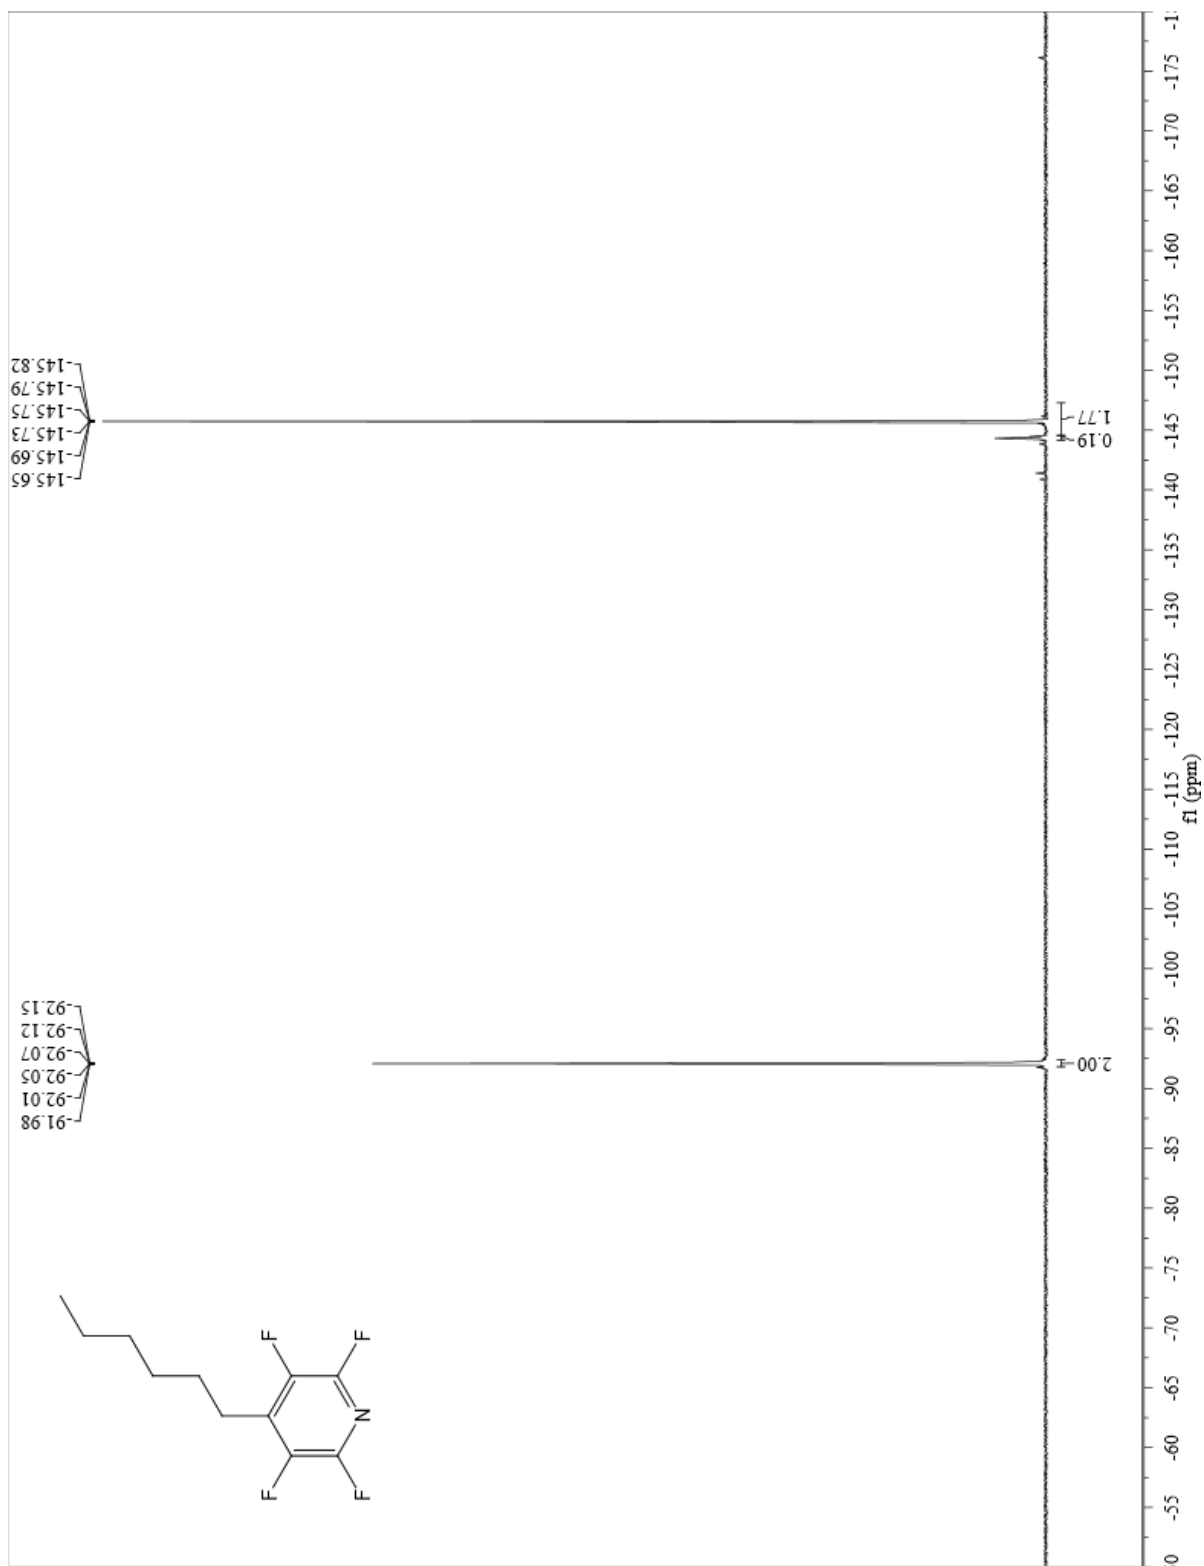

**<sup>1</sup>H NMR (400 MHz, Chloroform-*d*, @ rt) of S-7a 2,3,5,6-tetrafluoro-4-hexylpyridine**

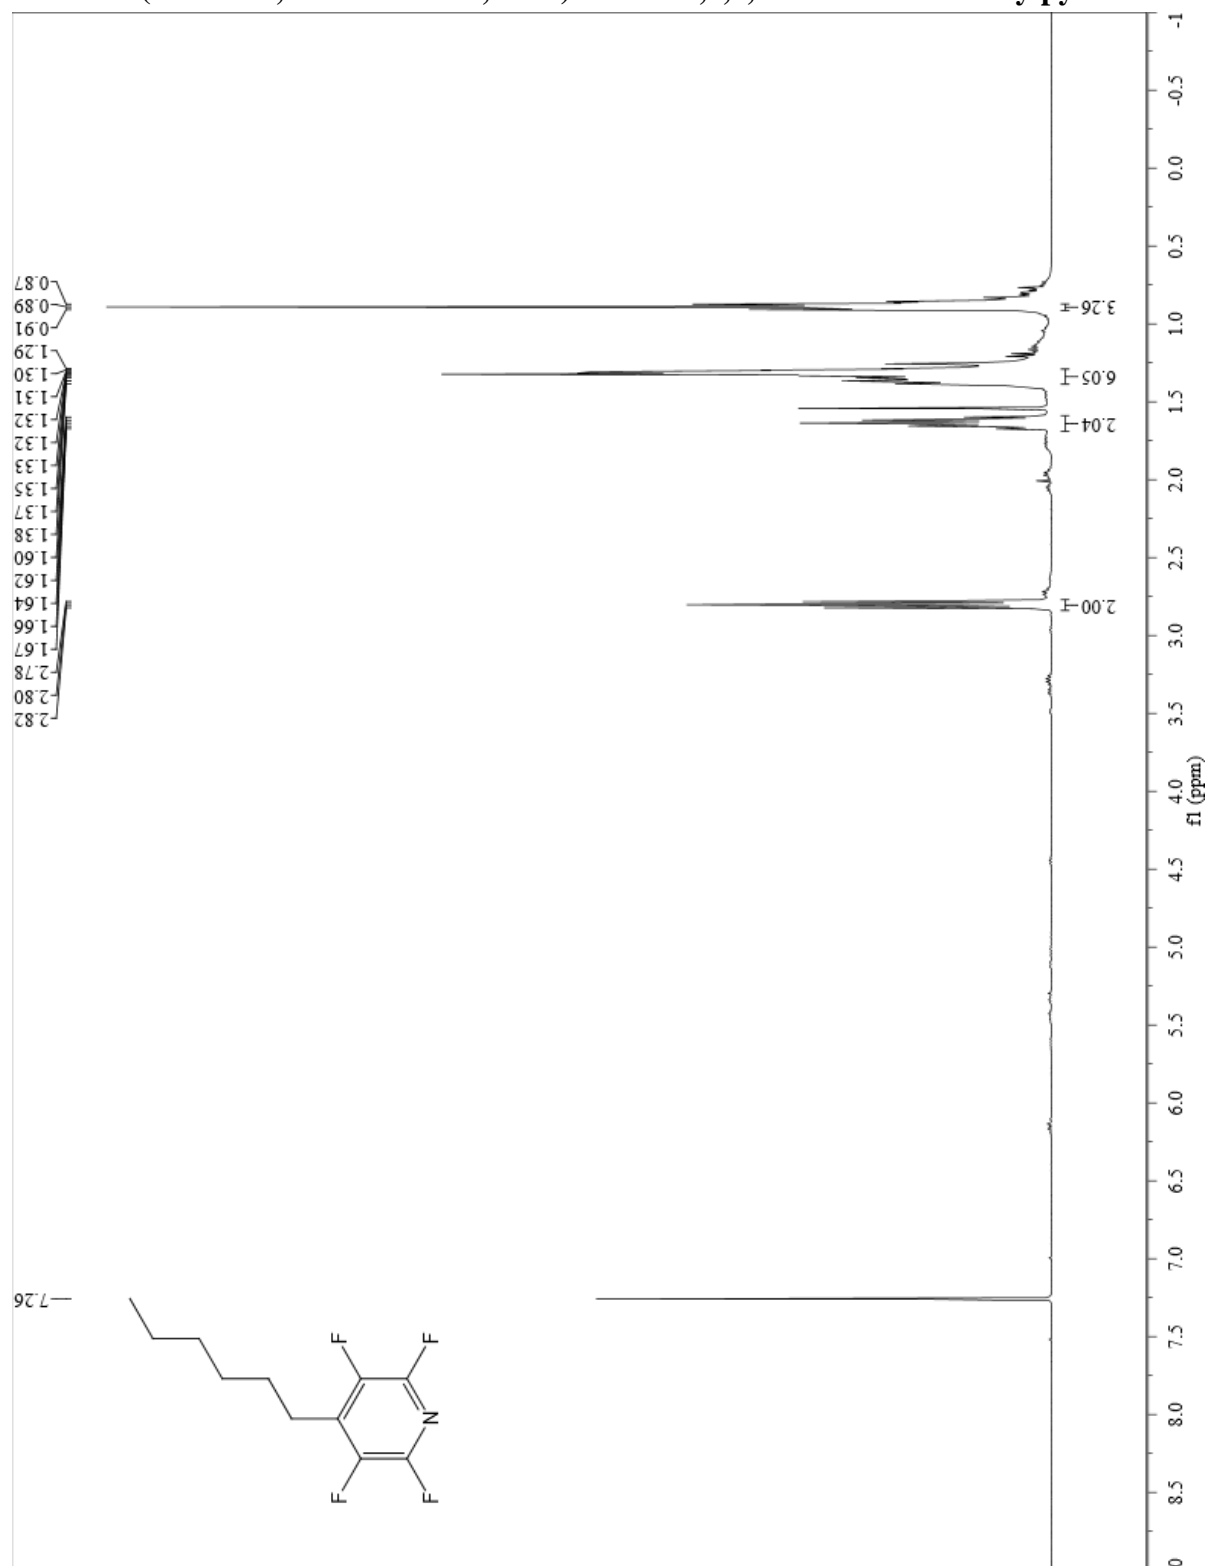

$^{13}\text{C}\{^1\text{H}\}$  NMR of (101 MHz, Chloroform-*d*, @ rt) S-7a 2,3,5,6-tetrafluoro-4-hexylpyridine

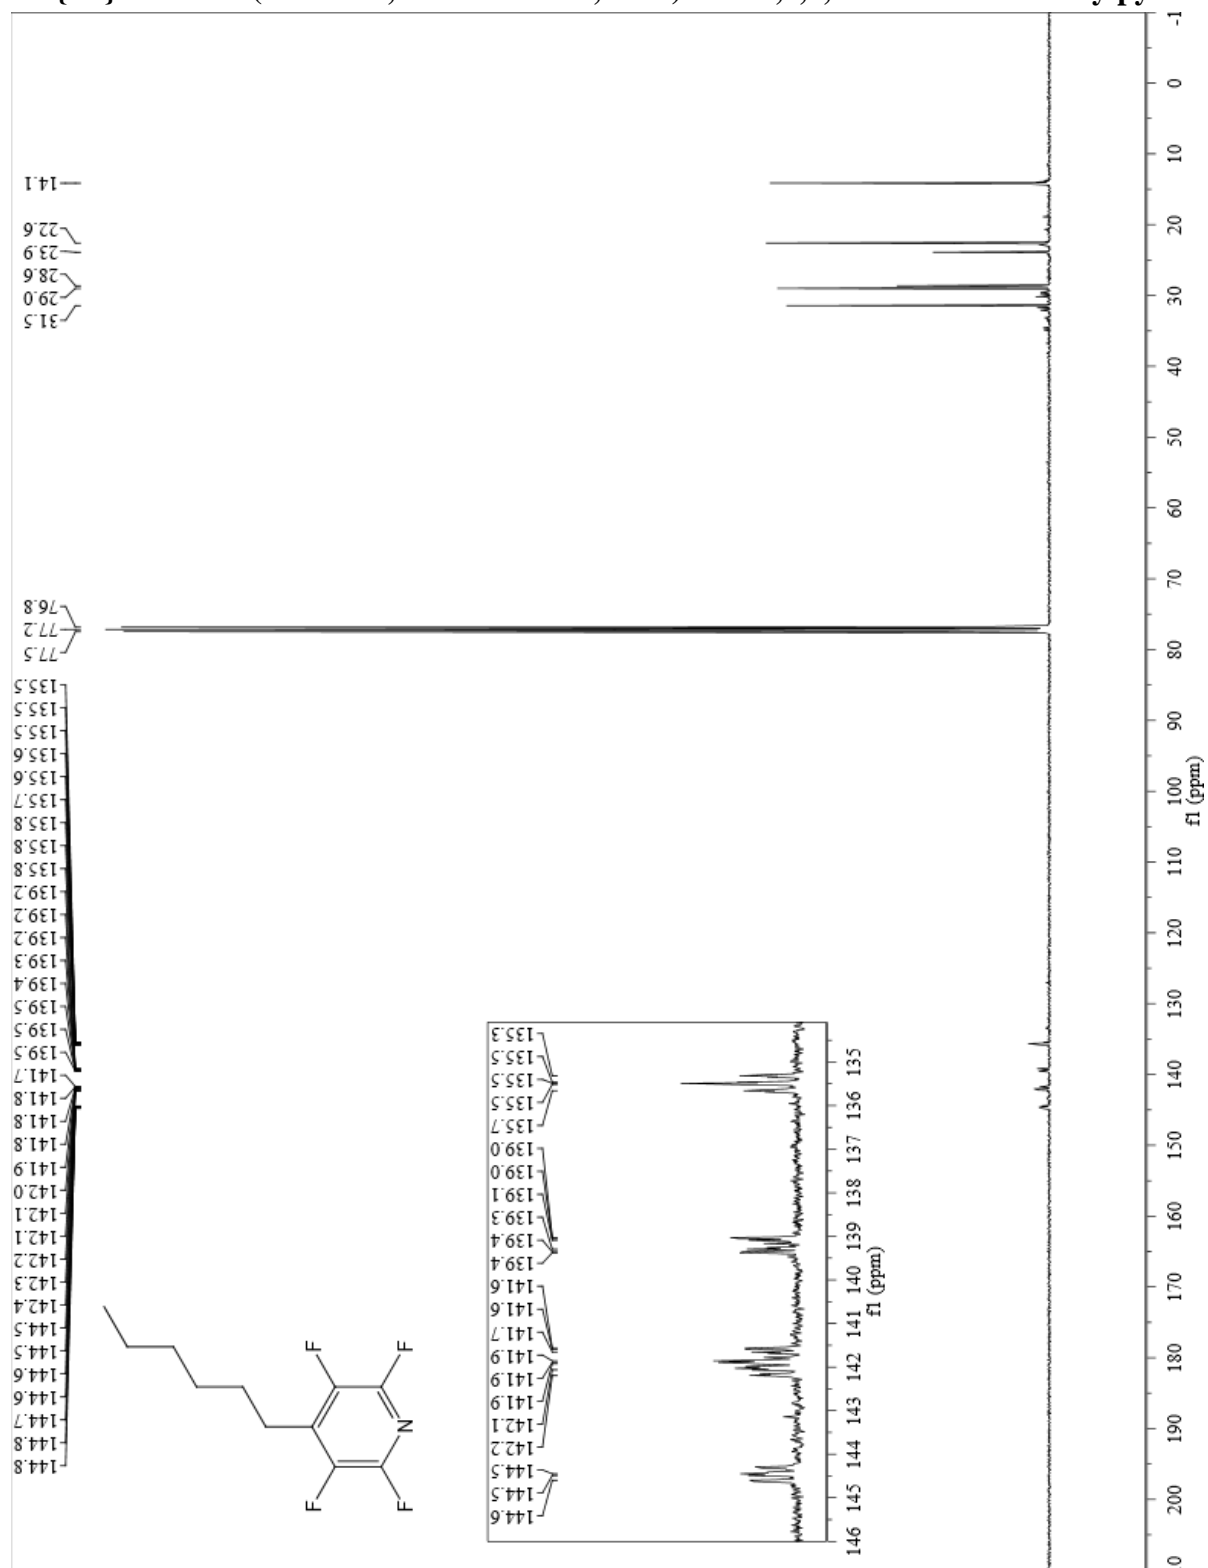



# GC and MS of S-7a 2,3,5,6-tetrafluoro-4-hexylpyridine

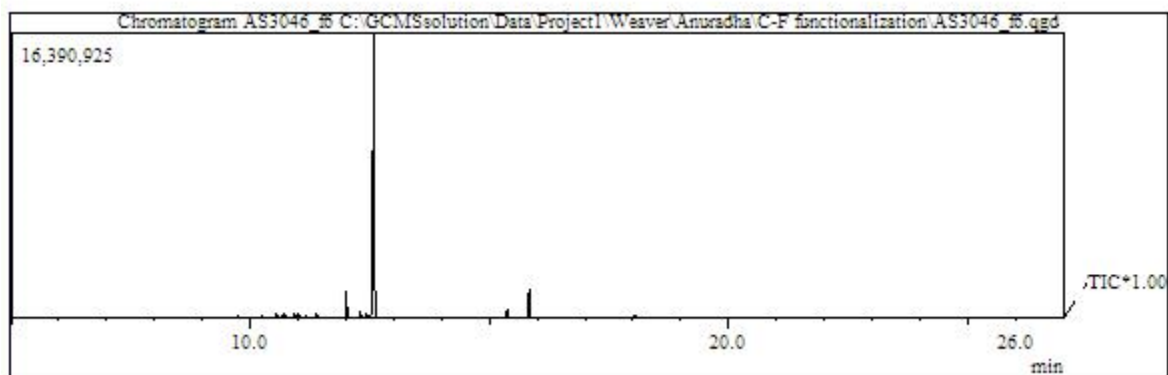

Spectrum

Line#:1 R.Time:12.6(Scan#:912)  
MassPeaks:172  
RawMode:Single 12.6(912) BasePeak:43(4796738)  
BG Mode:None

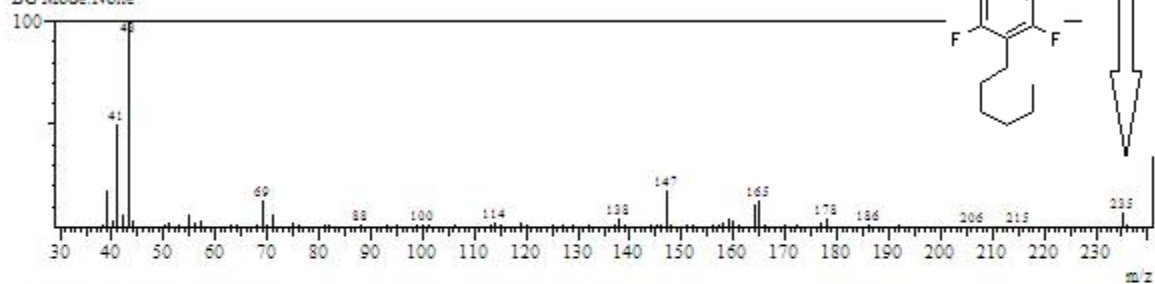

Line#:2 R.Time:12.0(Scan#:842)  
MassPeaks:110  
RawMode:Single 12.0(842) BasePeak:41(403839)  
BG Mode:None

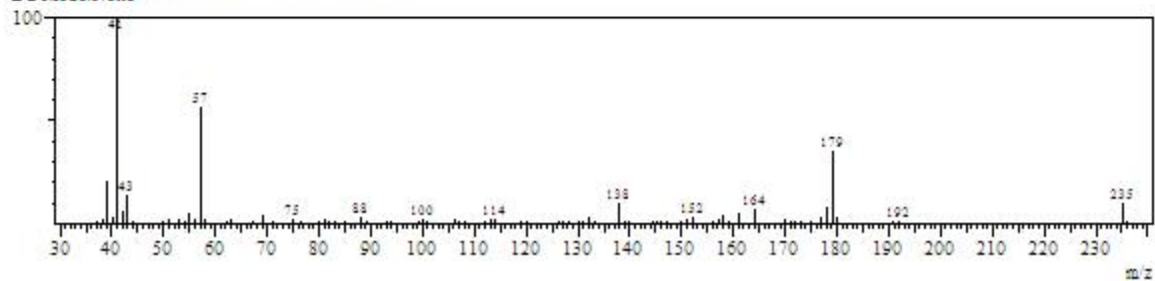

**<sup>19</sup>F NMR (376 MHz, Chloroform-*d*, @ rt) of S-8a 2,3,5,6-tetrafluoro-4-(tetrahydro-2H-pyran-2-yl)pyridine**

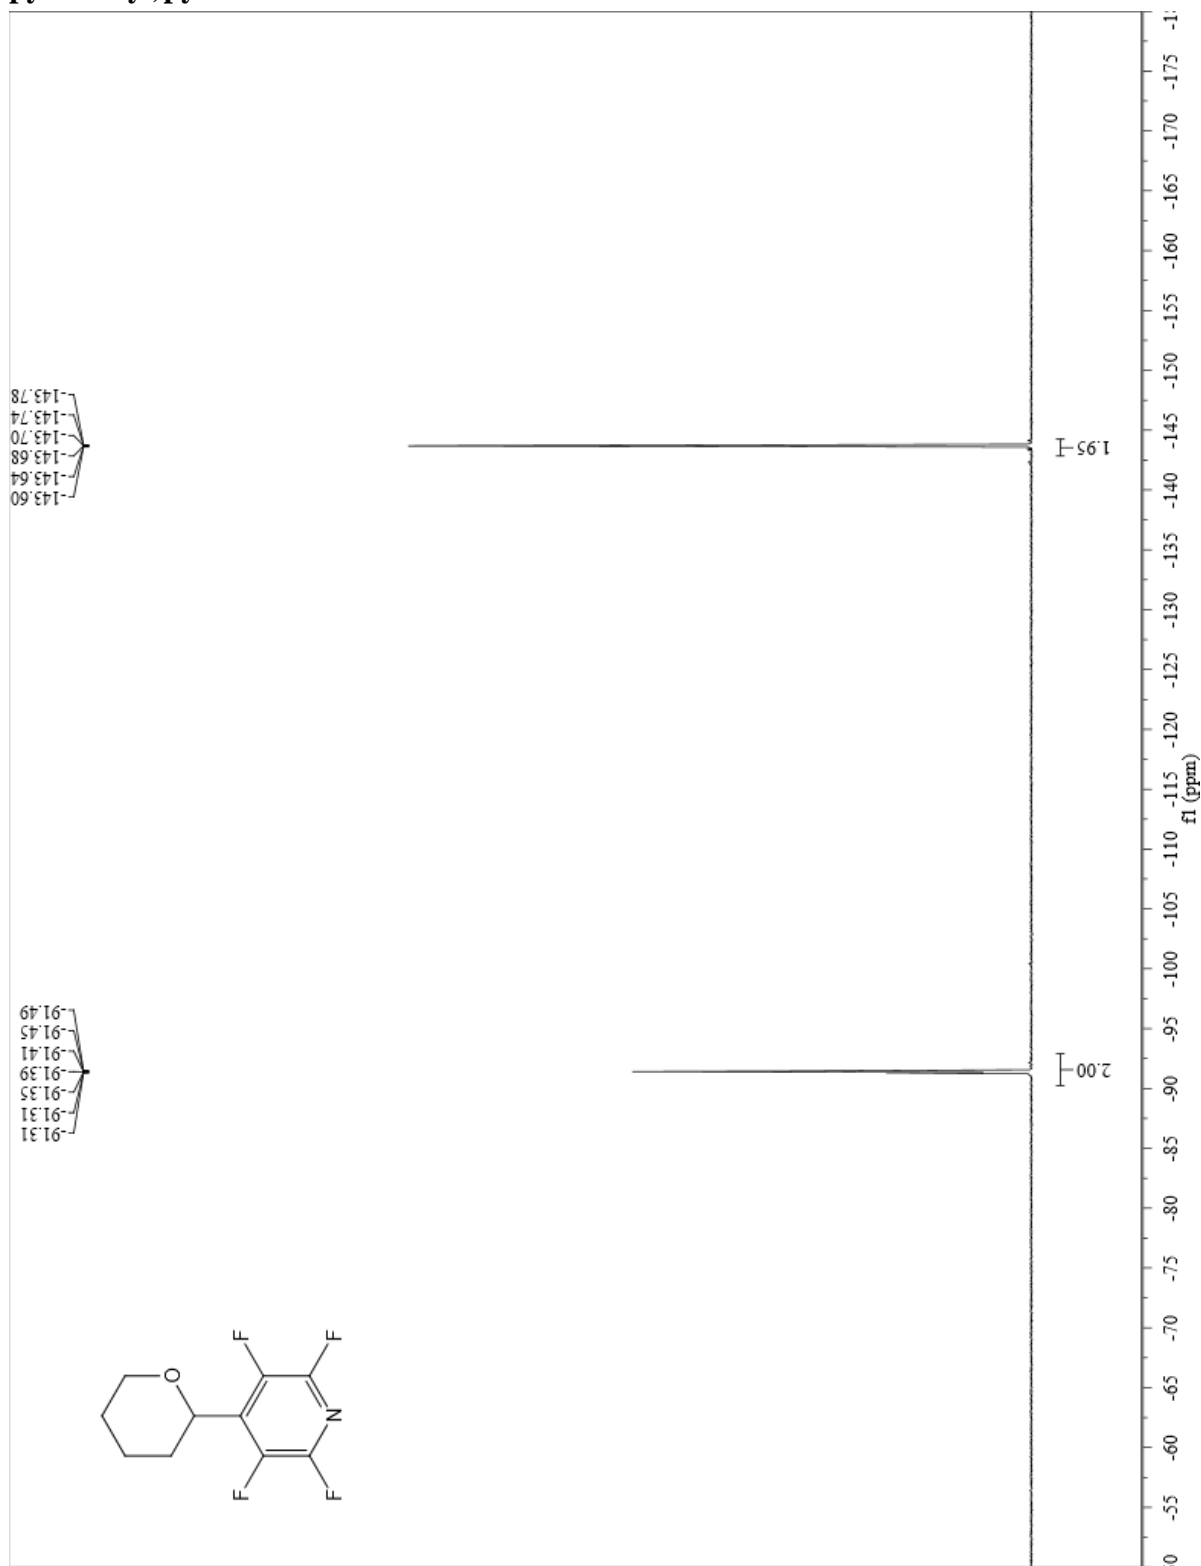

**<sup>1</sup>H NMR (400 MHz, Chloroform-*d*, @ rt) of S-8a 2,3,5,6-tetrafluoro-4-(tetrahydro-2H-pyran-2-yl)pyridine**

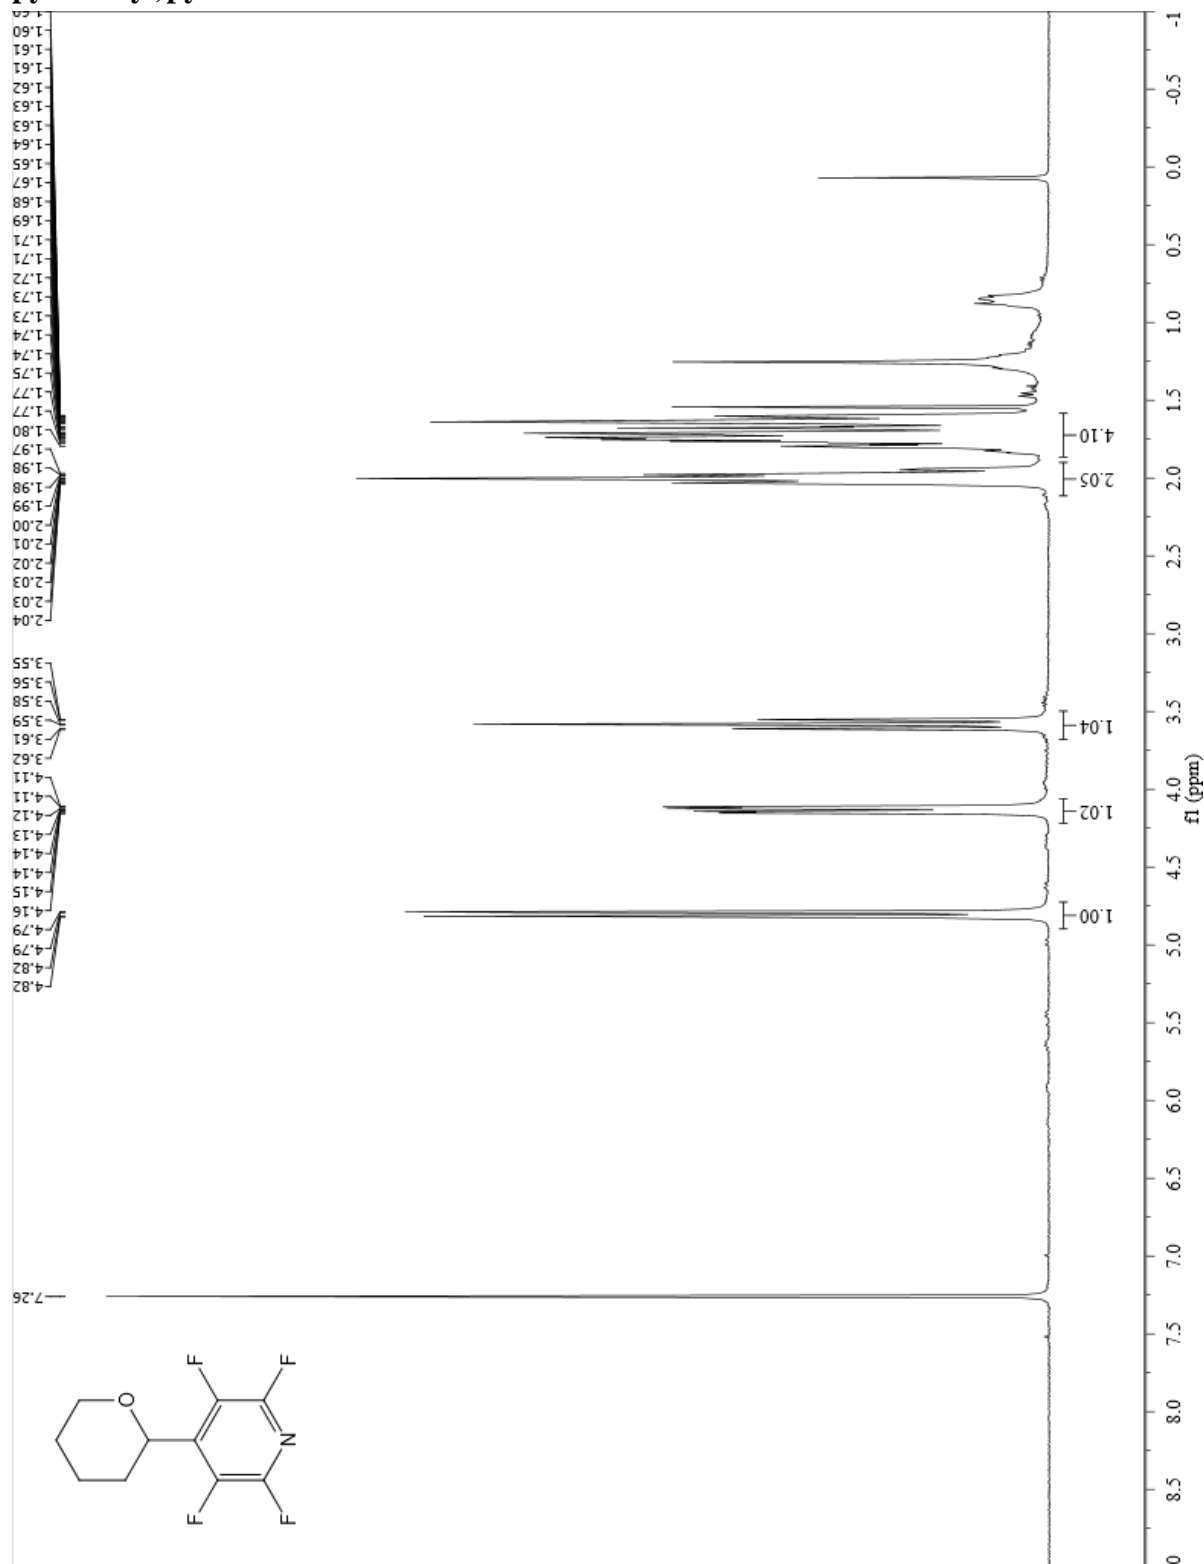

**$^{13}\text{C}\{^1\text{H}\}$  NMR of (101 MHz, Chloroform-*d*, @ rt) S-8a 2,3,5,6-tetrafluoro-4-(tetrahydro-2H-pyran-2-yl)pyridine**

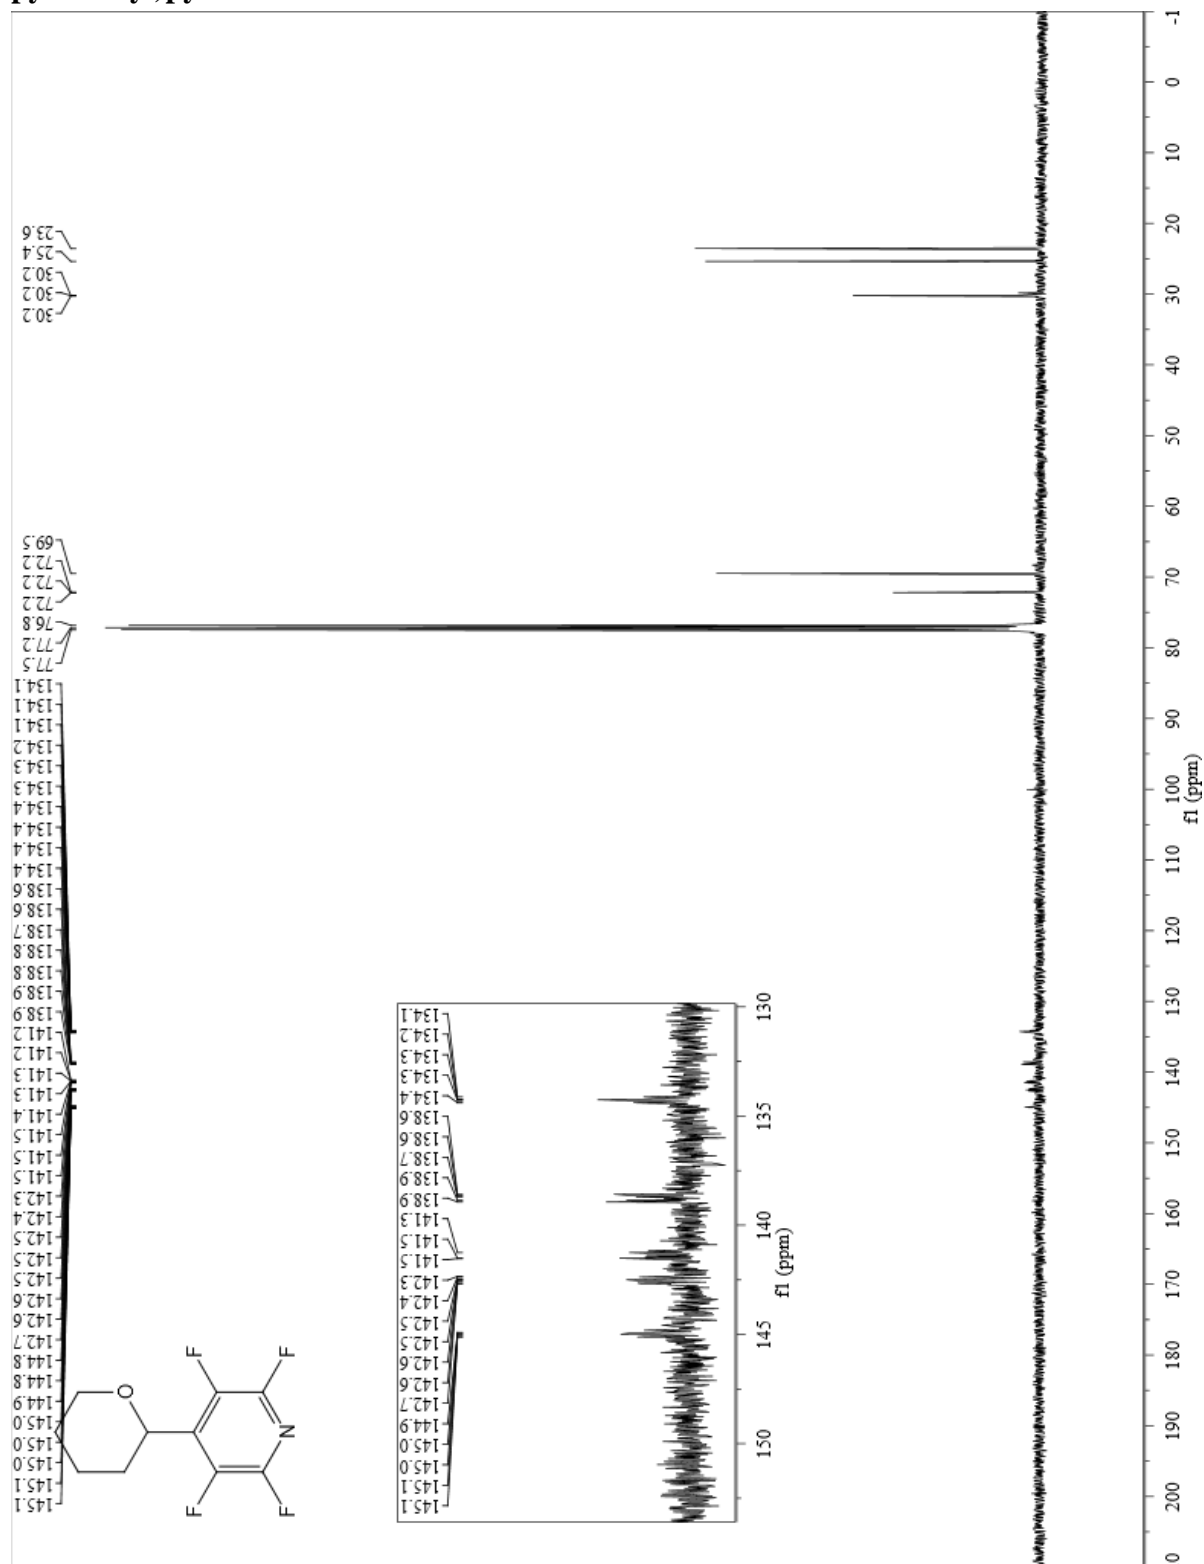

**<sup>19</sup>F NMR (376 MHz, Chloroform-*d*, @ rt) of S-8a 2,3,5,6-tetrafluoro-4-(tetrahydro-2H-pyran-3-yl)pyridine**

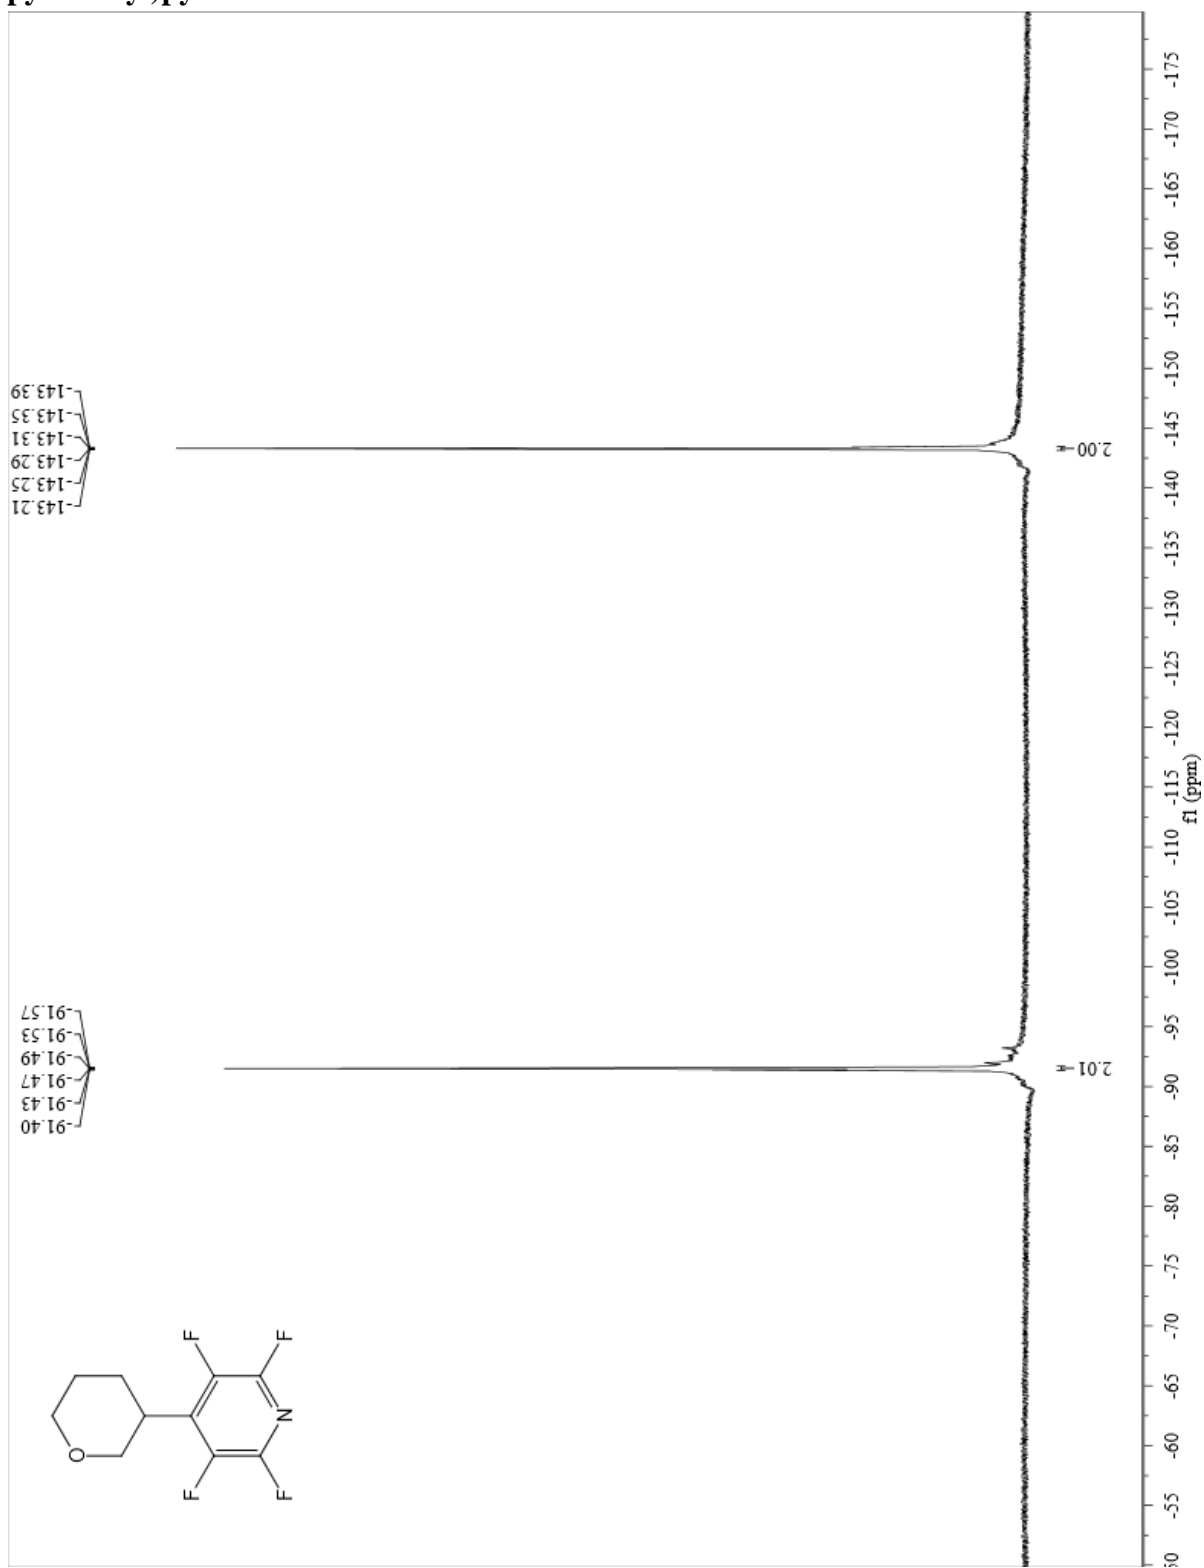

**<sup>1</sup>H NMR (400 MHz, Chloroform-*d*, @ rt) of S-8a 2,3,5,6-tetrafluoro-4-(tetrahydro-2H-pyran-3-yl)pyridine**

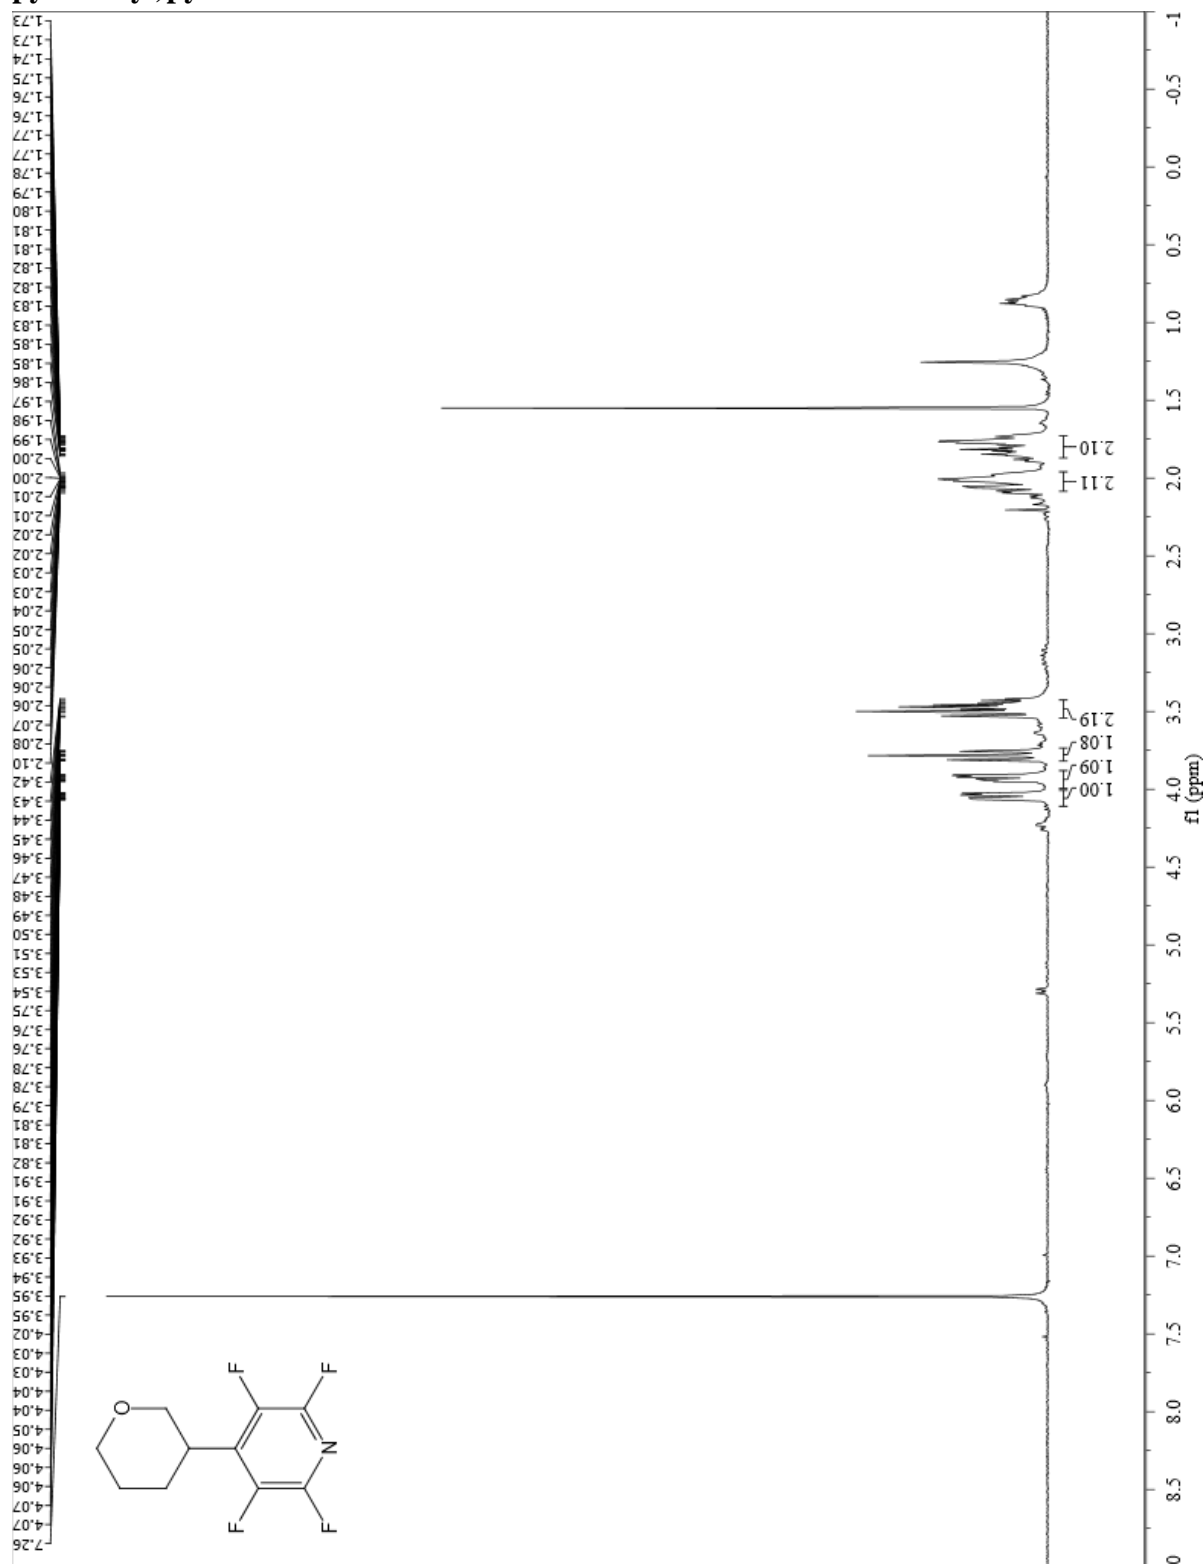

# GC and MS of S-8a 2,3,5,6-tetrafluoro-4-(tetrahydro-2H-pyran-2-yl)pyridine

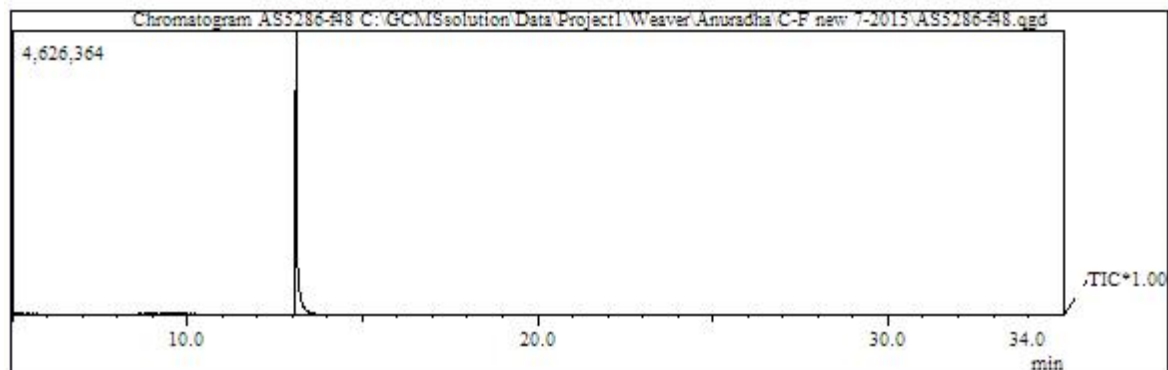

Spectrum

Line#: 1 R.Time: 13.2(Scan#: 980)  
MassPeaks: 76  
RawMode: Single 13.2(980) BasePeak: 41(239672)  
BG Mode: None

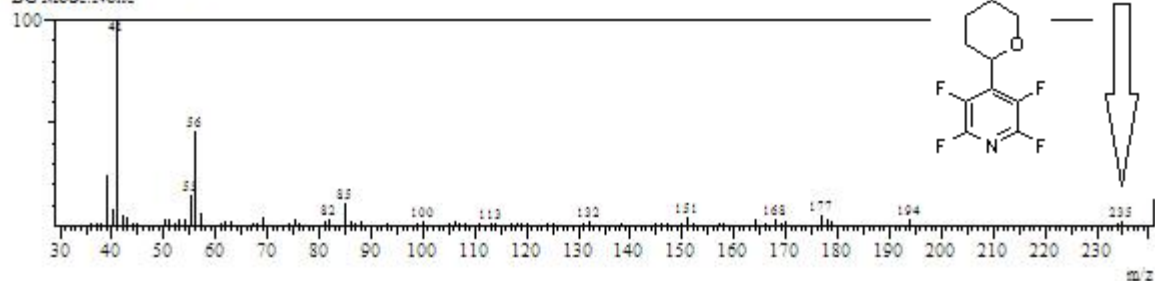

**<sup>19</sup>F NMR (376 MHz, Chloroform-*d*, @ rt) of S-9a 3-(perfluoropyridin-4-yl)cyclohexanone**

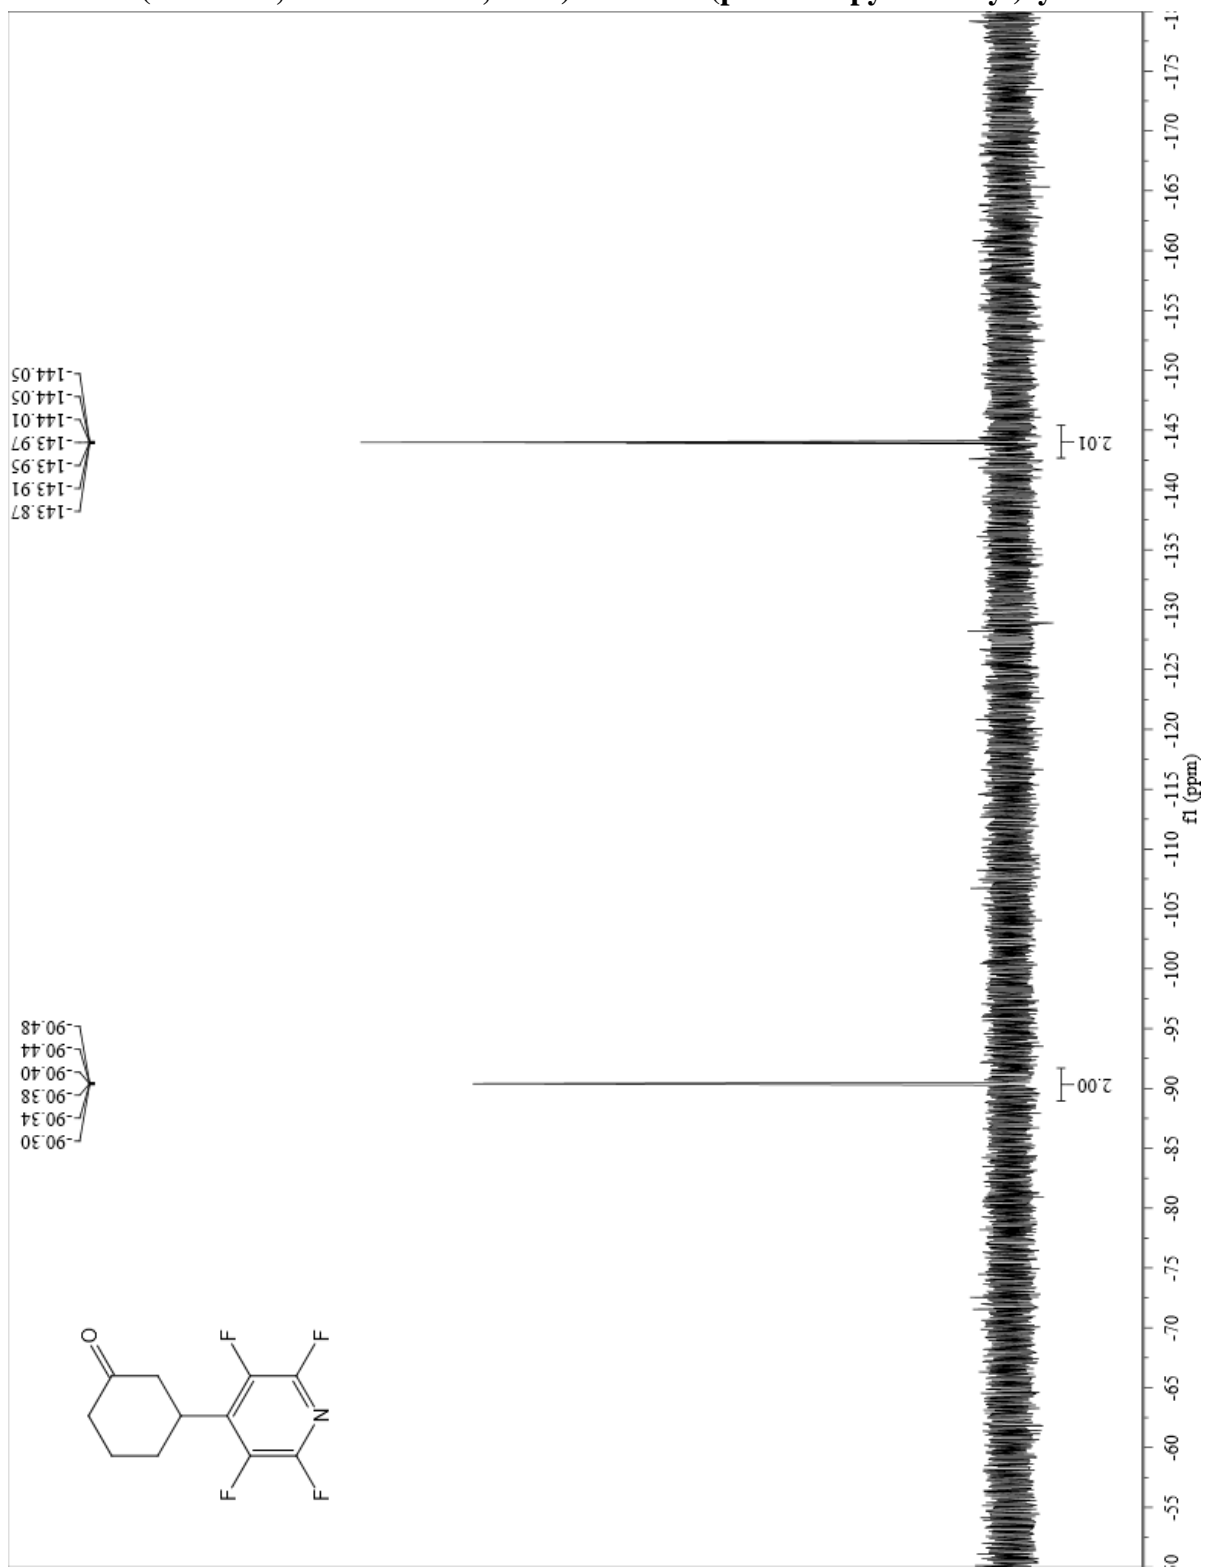



**<sup>1</sup>H NMR (400 MHz, Chloroform-*d*, @ rt) of S-9a 3-(perfluoropyridin-4-yl)cyclohexanone**

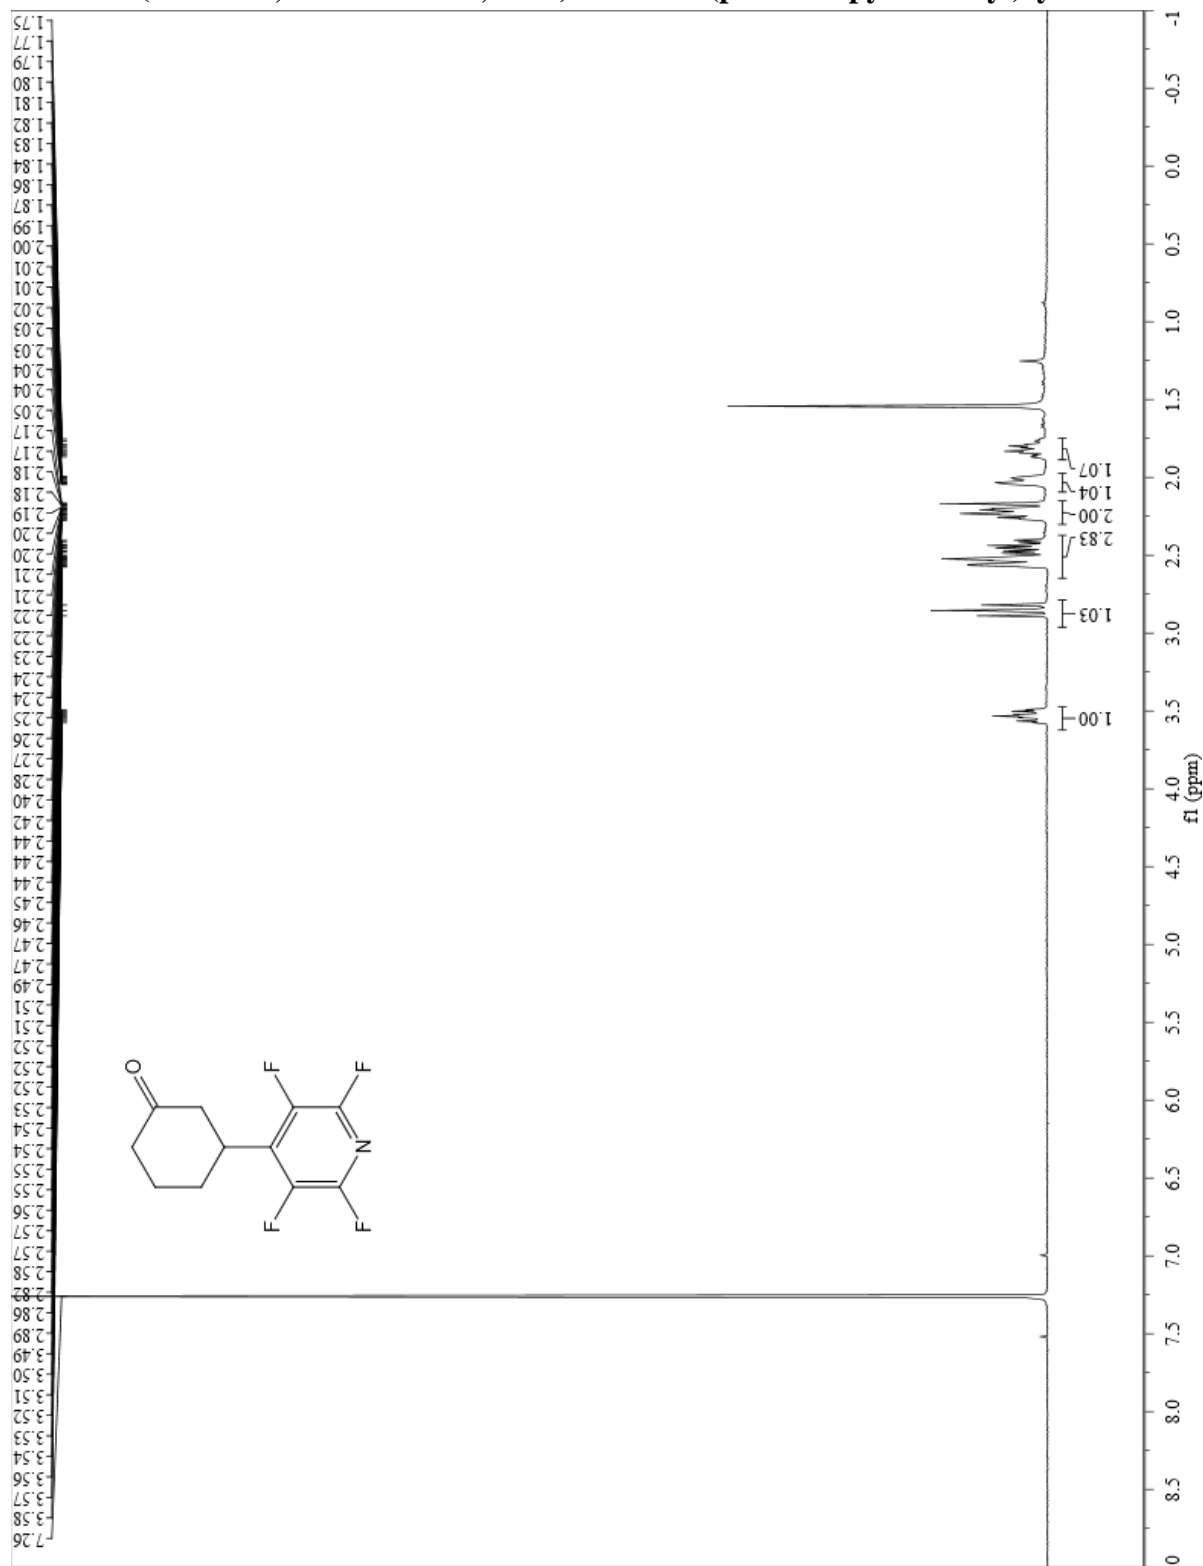

**<sup>13</sup>C{<sup>1</sup>H} NMR (101 MHz, Chloroform-*d*, @ rt) of S-9a 3-(perfluoropyridin-4-yl)cyclohexanone**

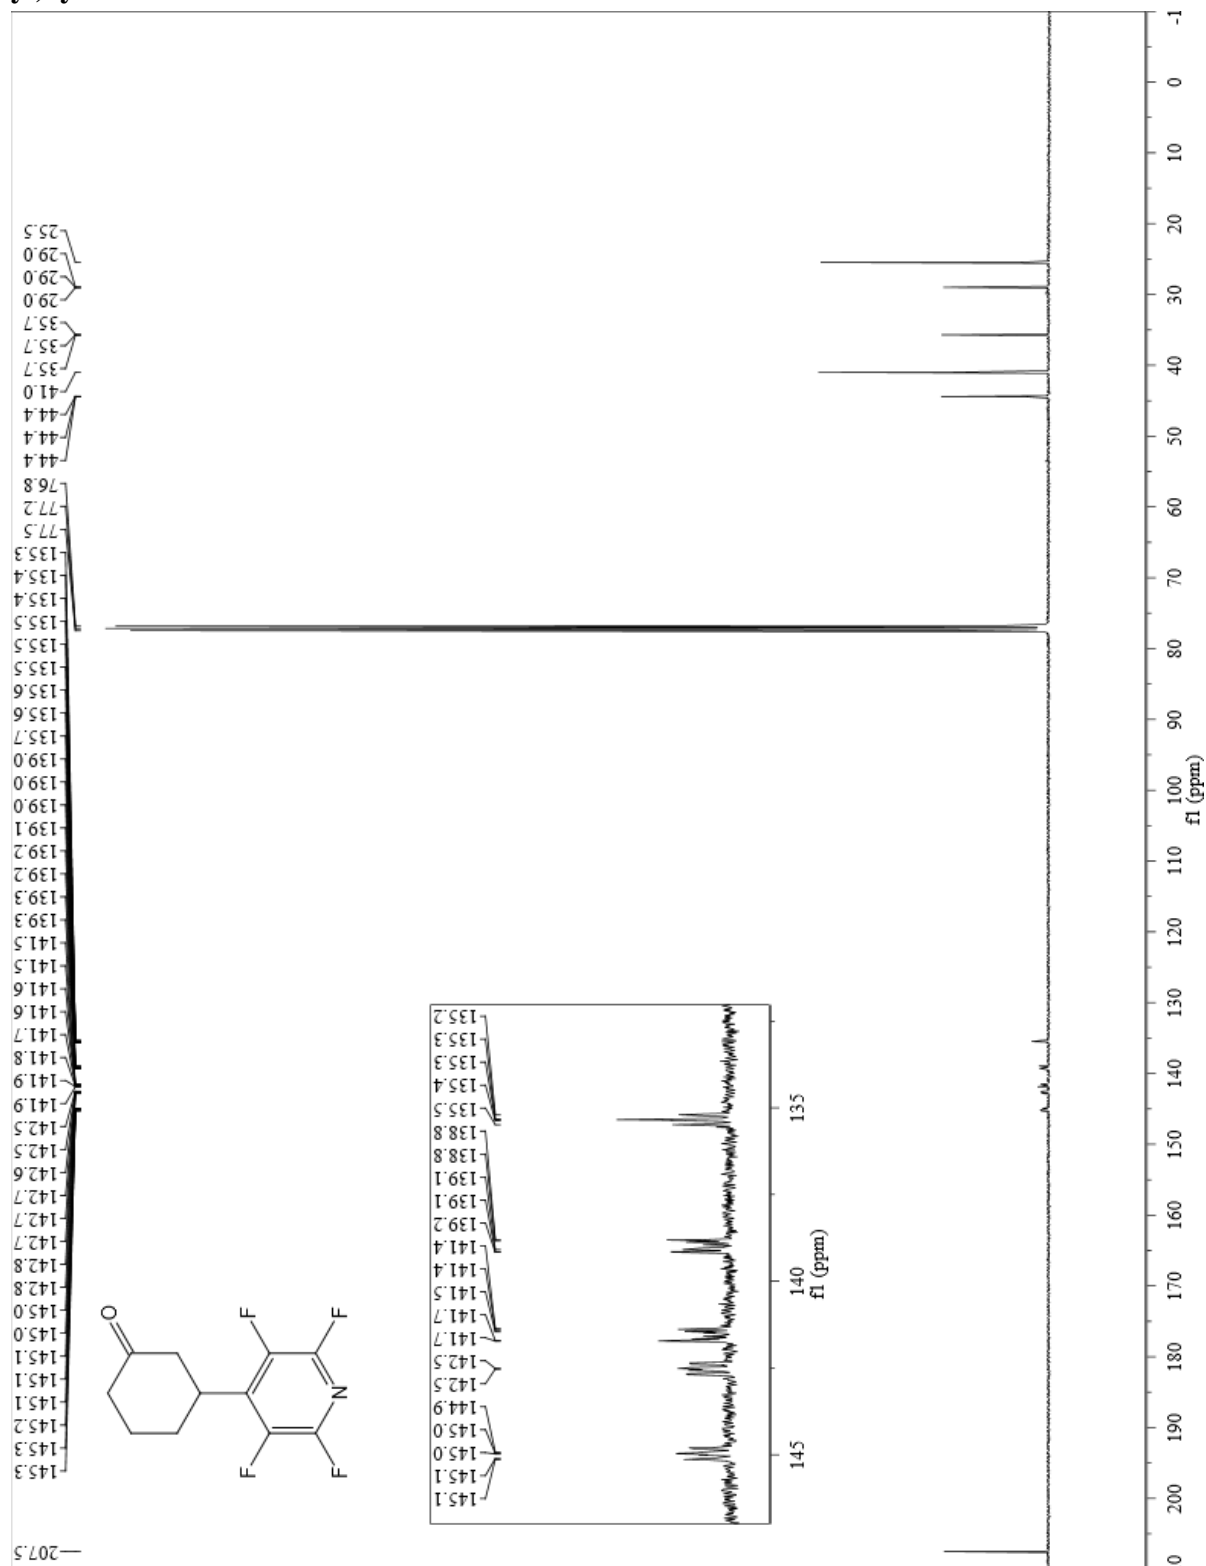

# GC and MS of S-9a 3-(perfluoropyridin-4-yl)cyclohexanone

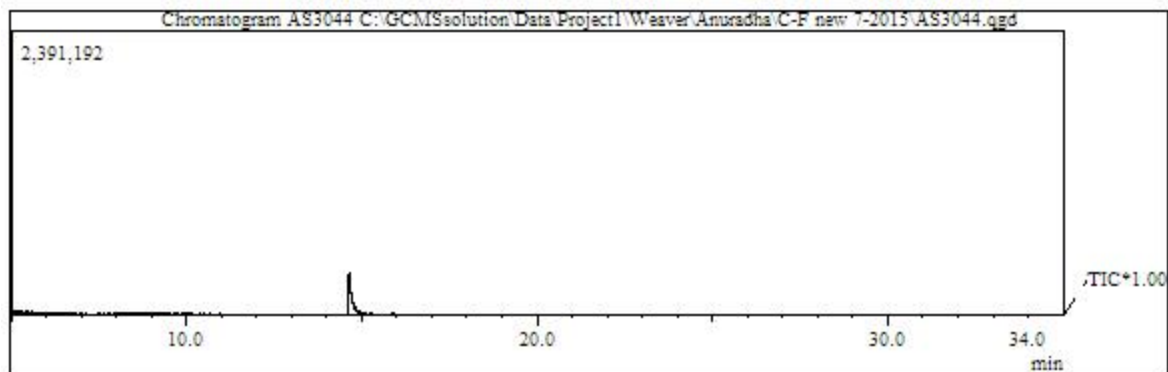

Spectrum

Line#1 R.Time:14.7(Scan#:1159)  
MassPeaks:71  
RawMode:Single 14.7(1159) BasePeak:42(50202)  
BG Mode:None

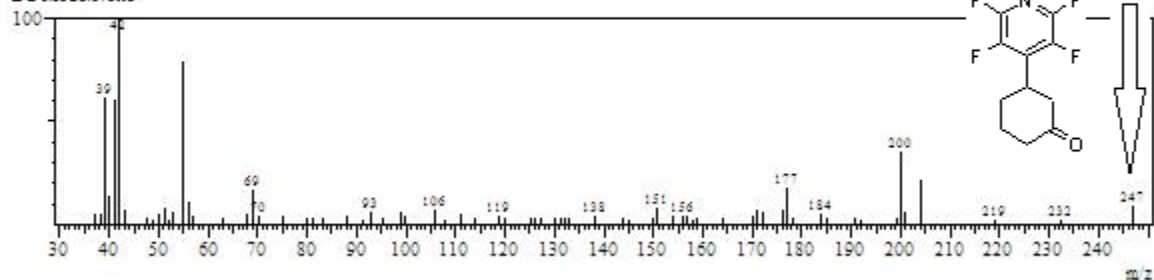

**<sup>19</sup>F NMR (376 MHz, Chloroform-*d*, @ rt) of S-10a 3-methyl-2-(perfluoropyridin-4-yl)butan-1-ol**

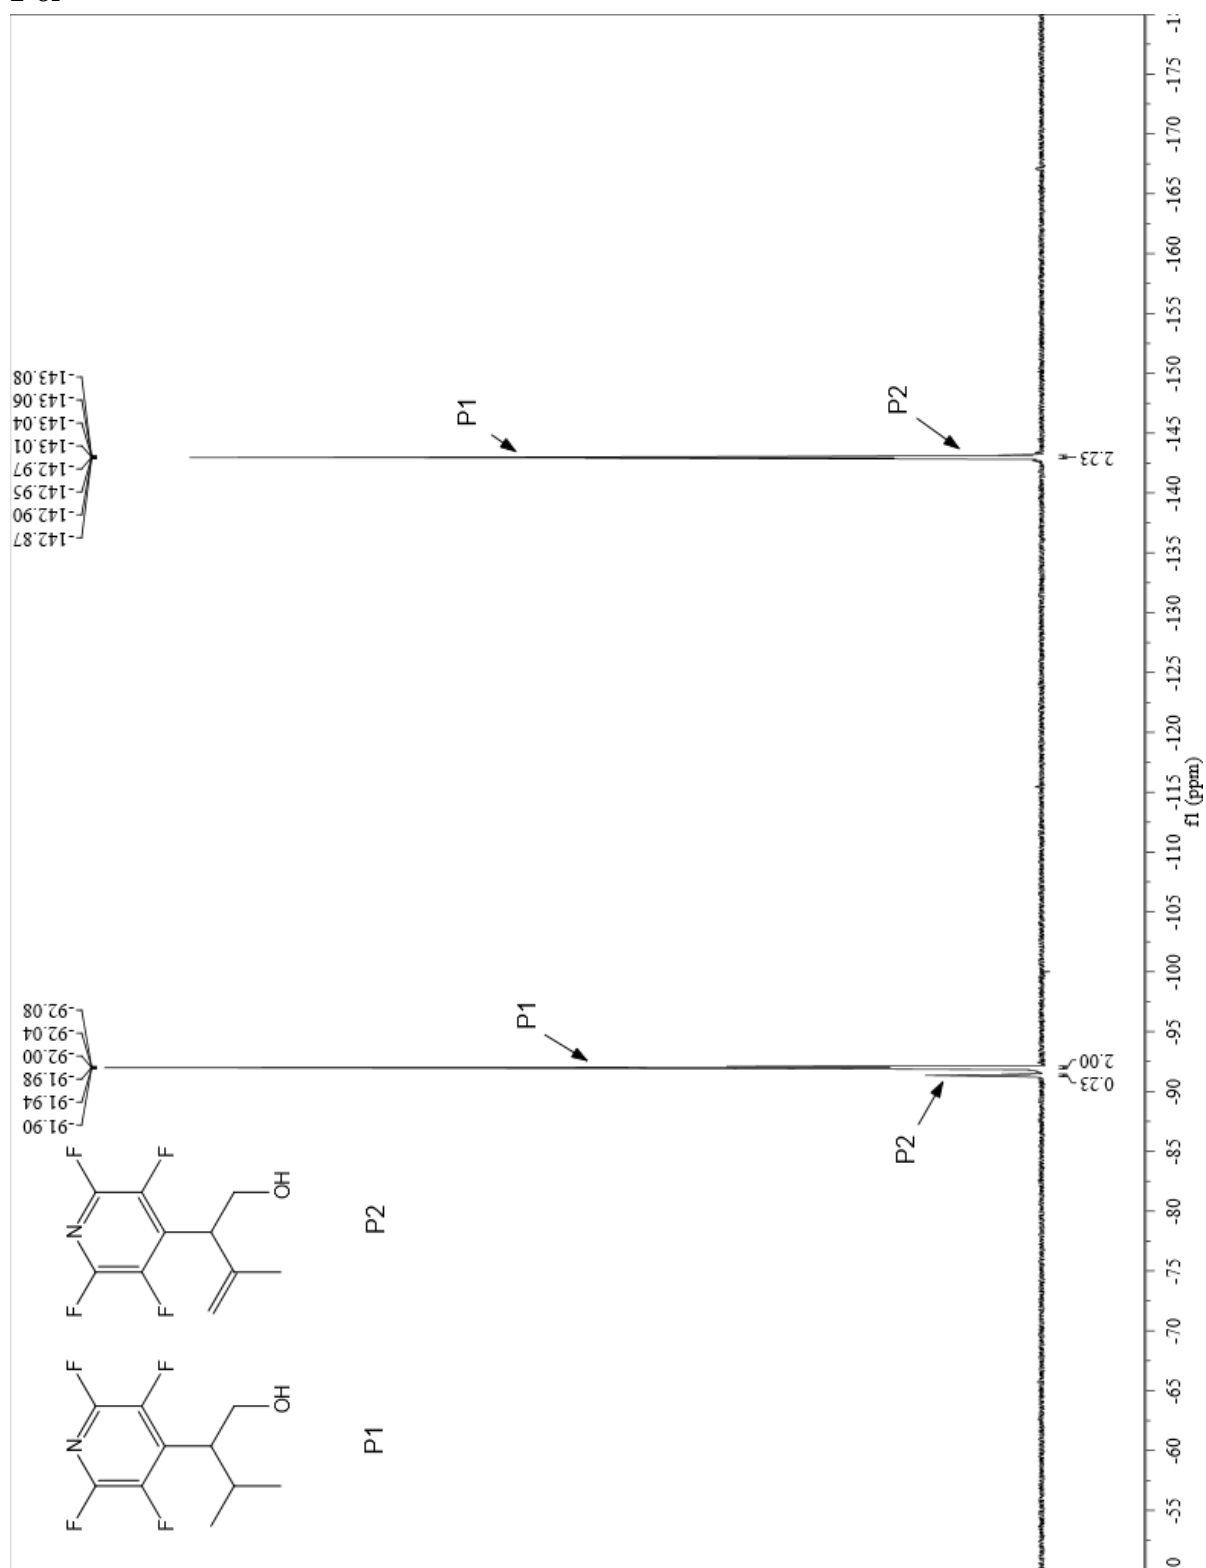

**<sup>1</sup>H NMR (400 MHz, Chloroform-*d*, @ rt) of S-10a 3-methyl-2-(perfluoropyridin-4-yl)butan-1-ol**

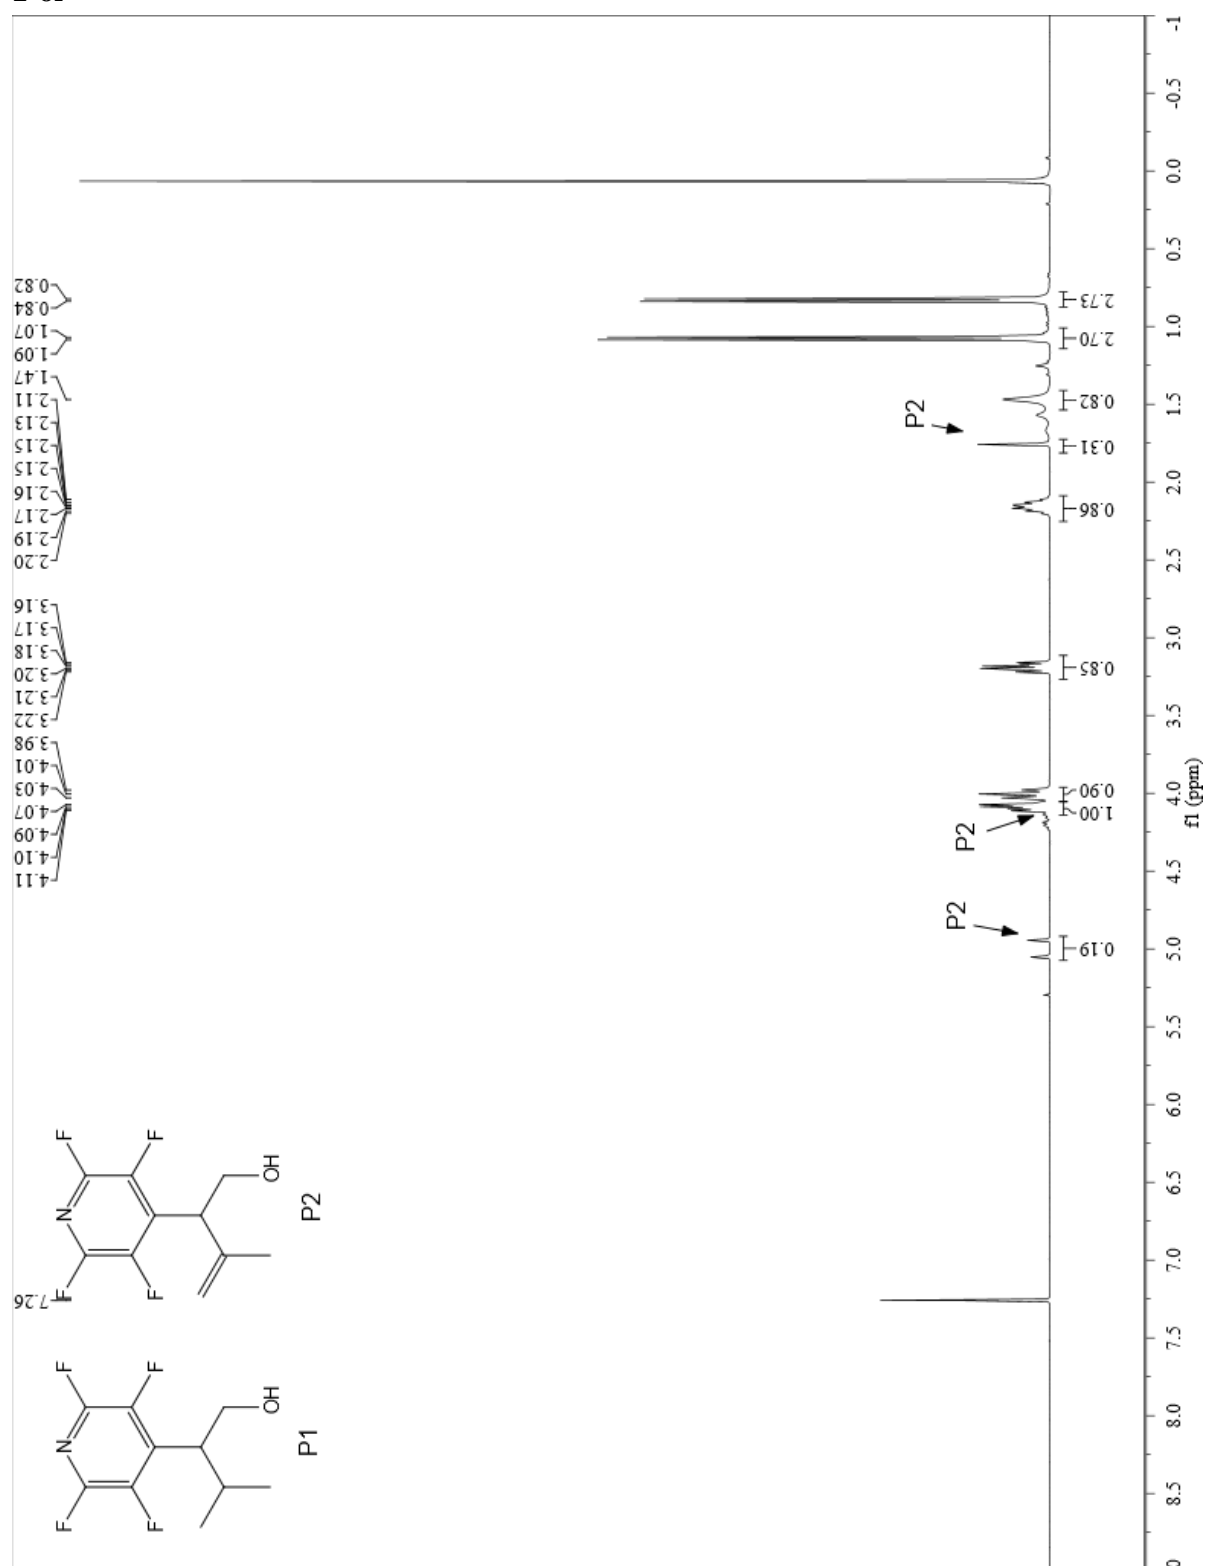

$^{13}\text{C}\{^1\text{H}\}$  NMR (101 MHz, Chloroform-*d*, @ rt) of S-10a 3-methyl-2-(perfluoropyridin-4-yl)butan-1-ol

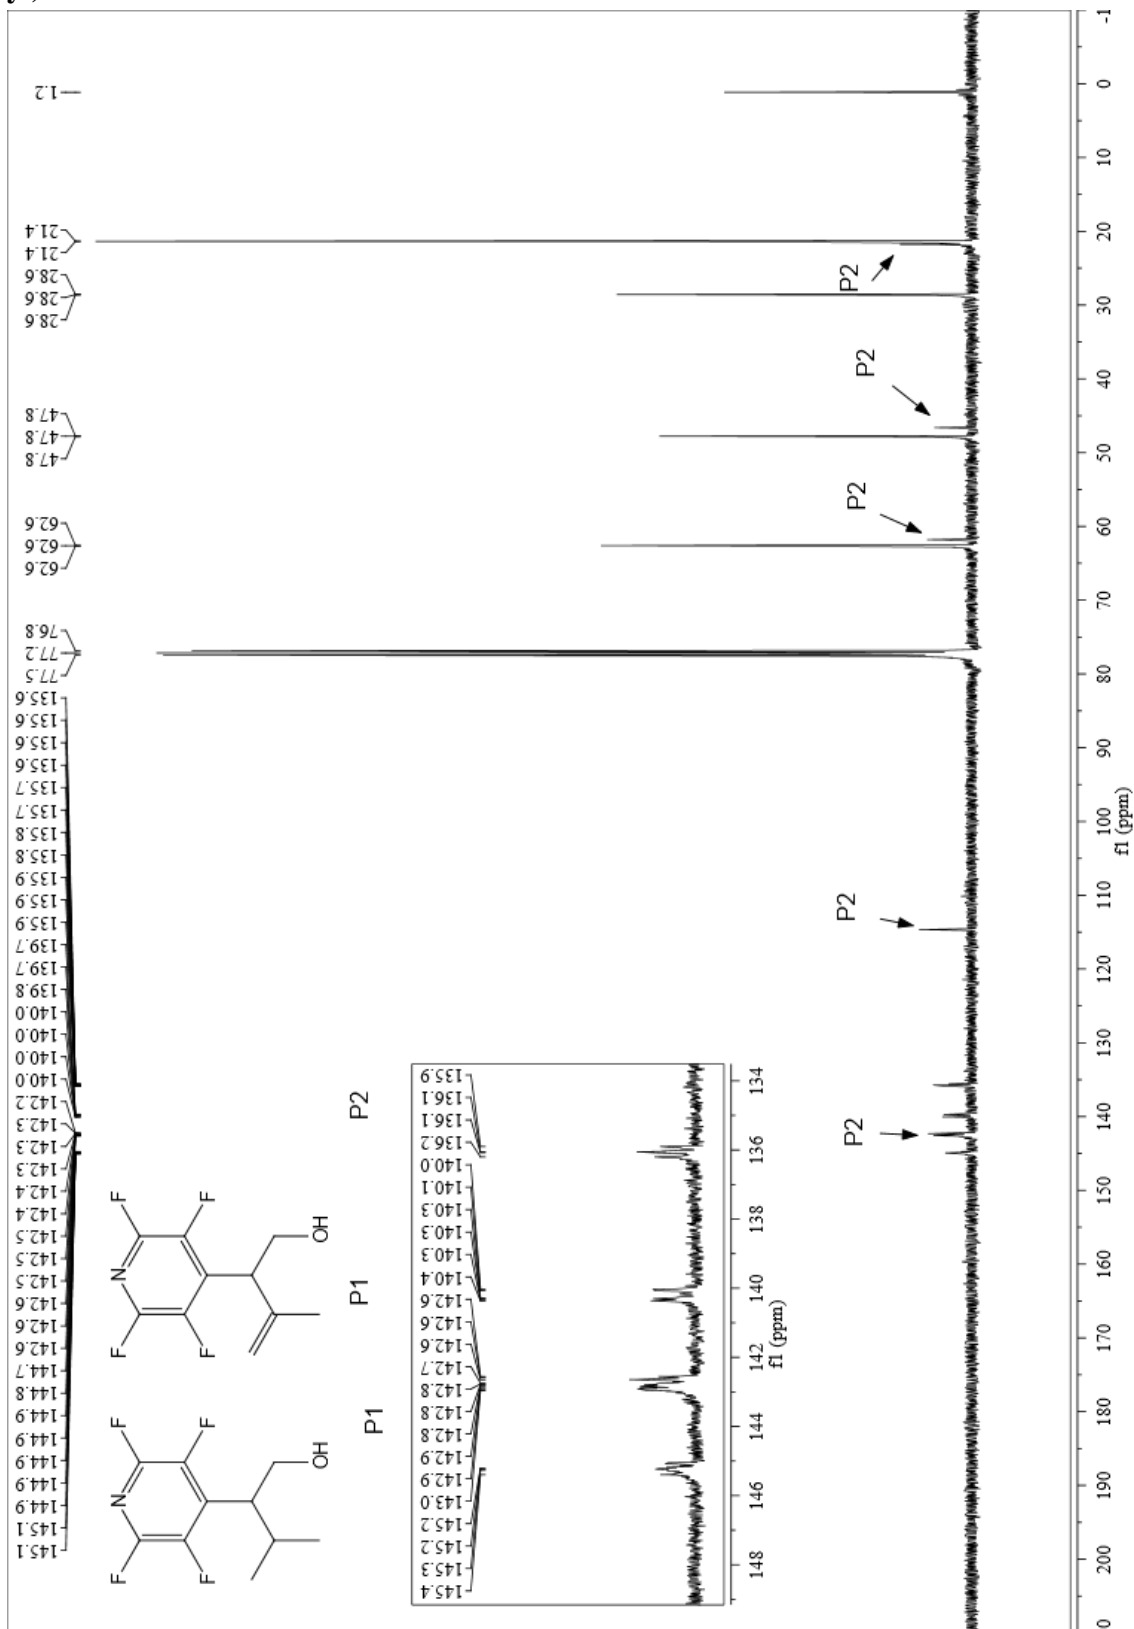

# GC and MS of S-10a 3-methyl-2-(perfluoropyridin-4-yl)butan-1-ol

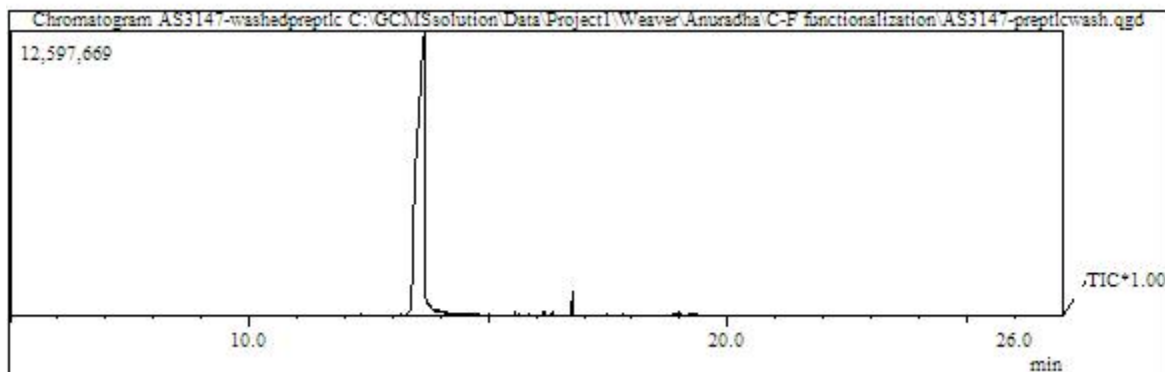

Spectrum

Line#: 1 RTime: 13.6(Scan#: 1034)  
MassPeaks: 176  
RawMode: Single 13.6(1034) BasePeak: 43(2343545)  
BG Mode: None

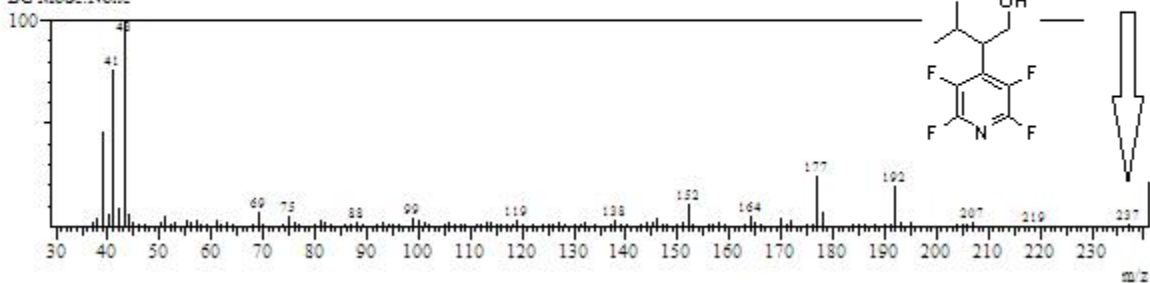

<sup>19</sup>F NMR (376 MHz, Chloroform-*d*, @ rt) of S-11a 6-(perfluoropyridin-4-yl)hexan-1-ol

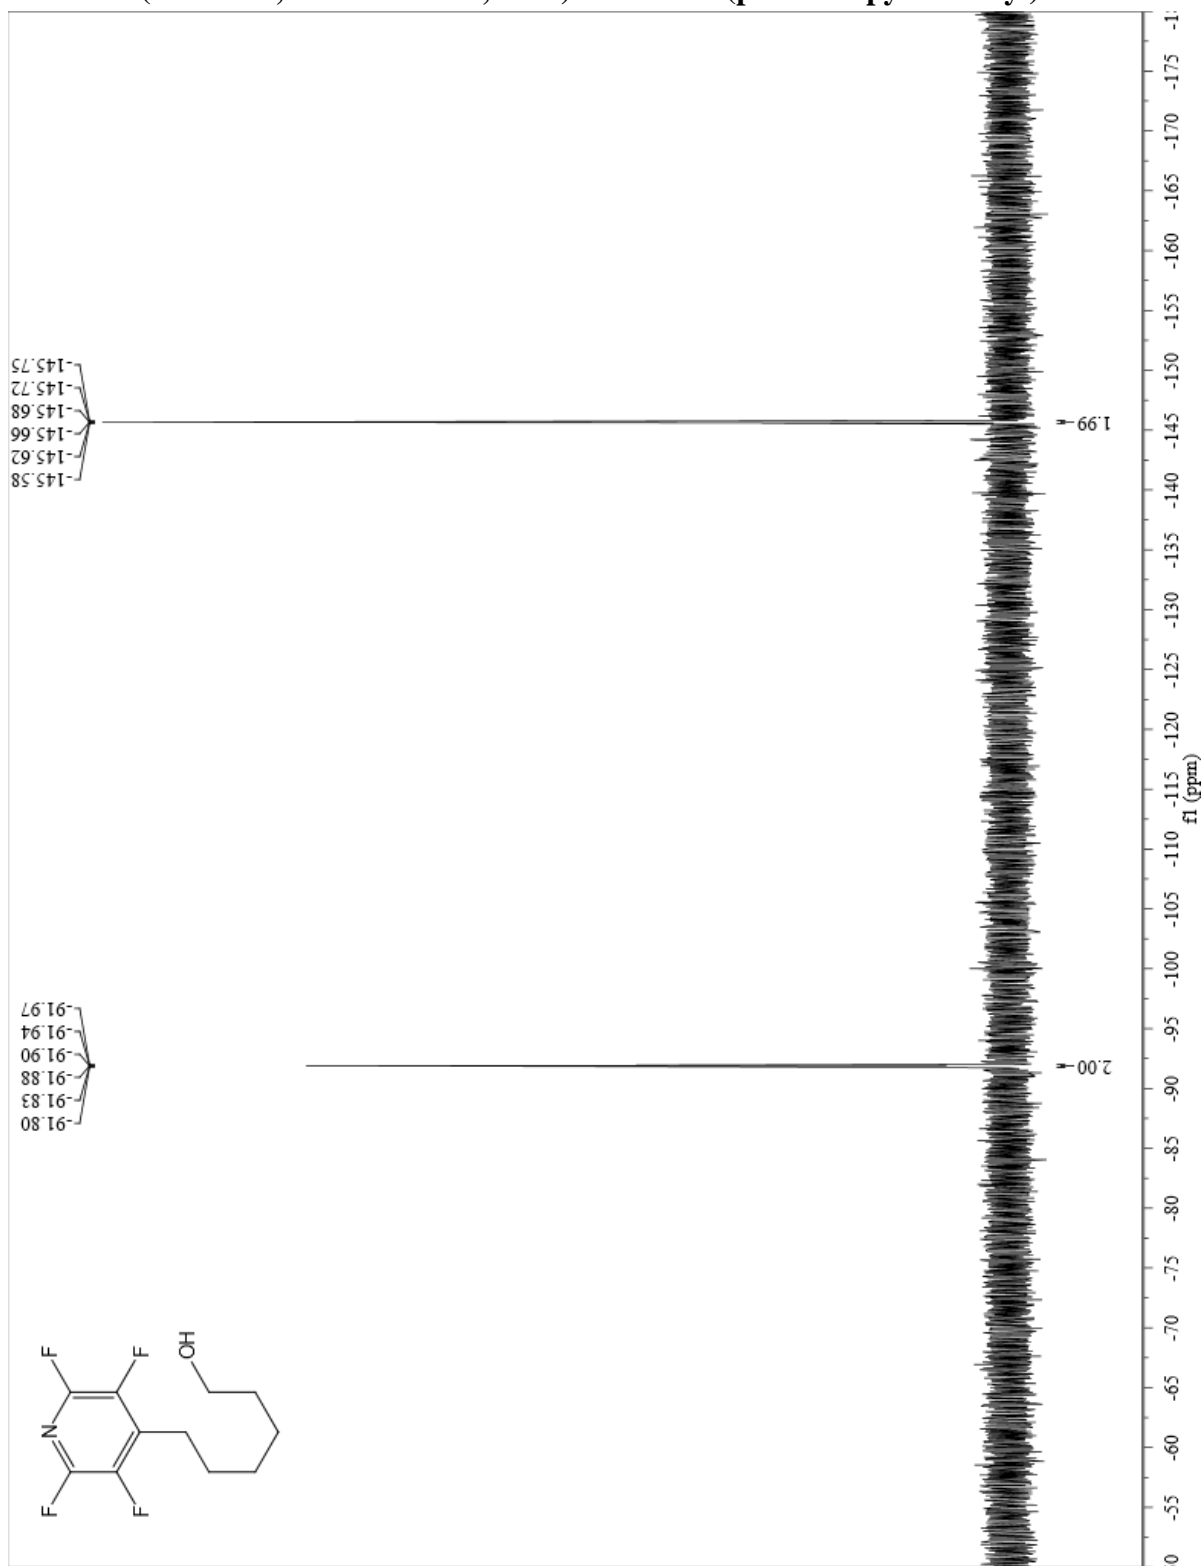



**<sup>1</sup>H NMR (400 MHz, Chloroform-*d*, @ rt) of S-11a 6-(perfluoropyridin-4-yl)hexan-1-ol**

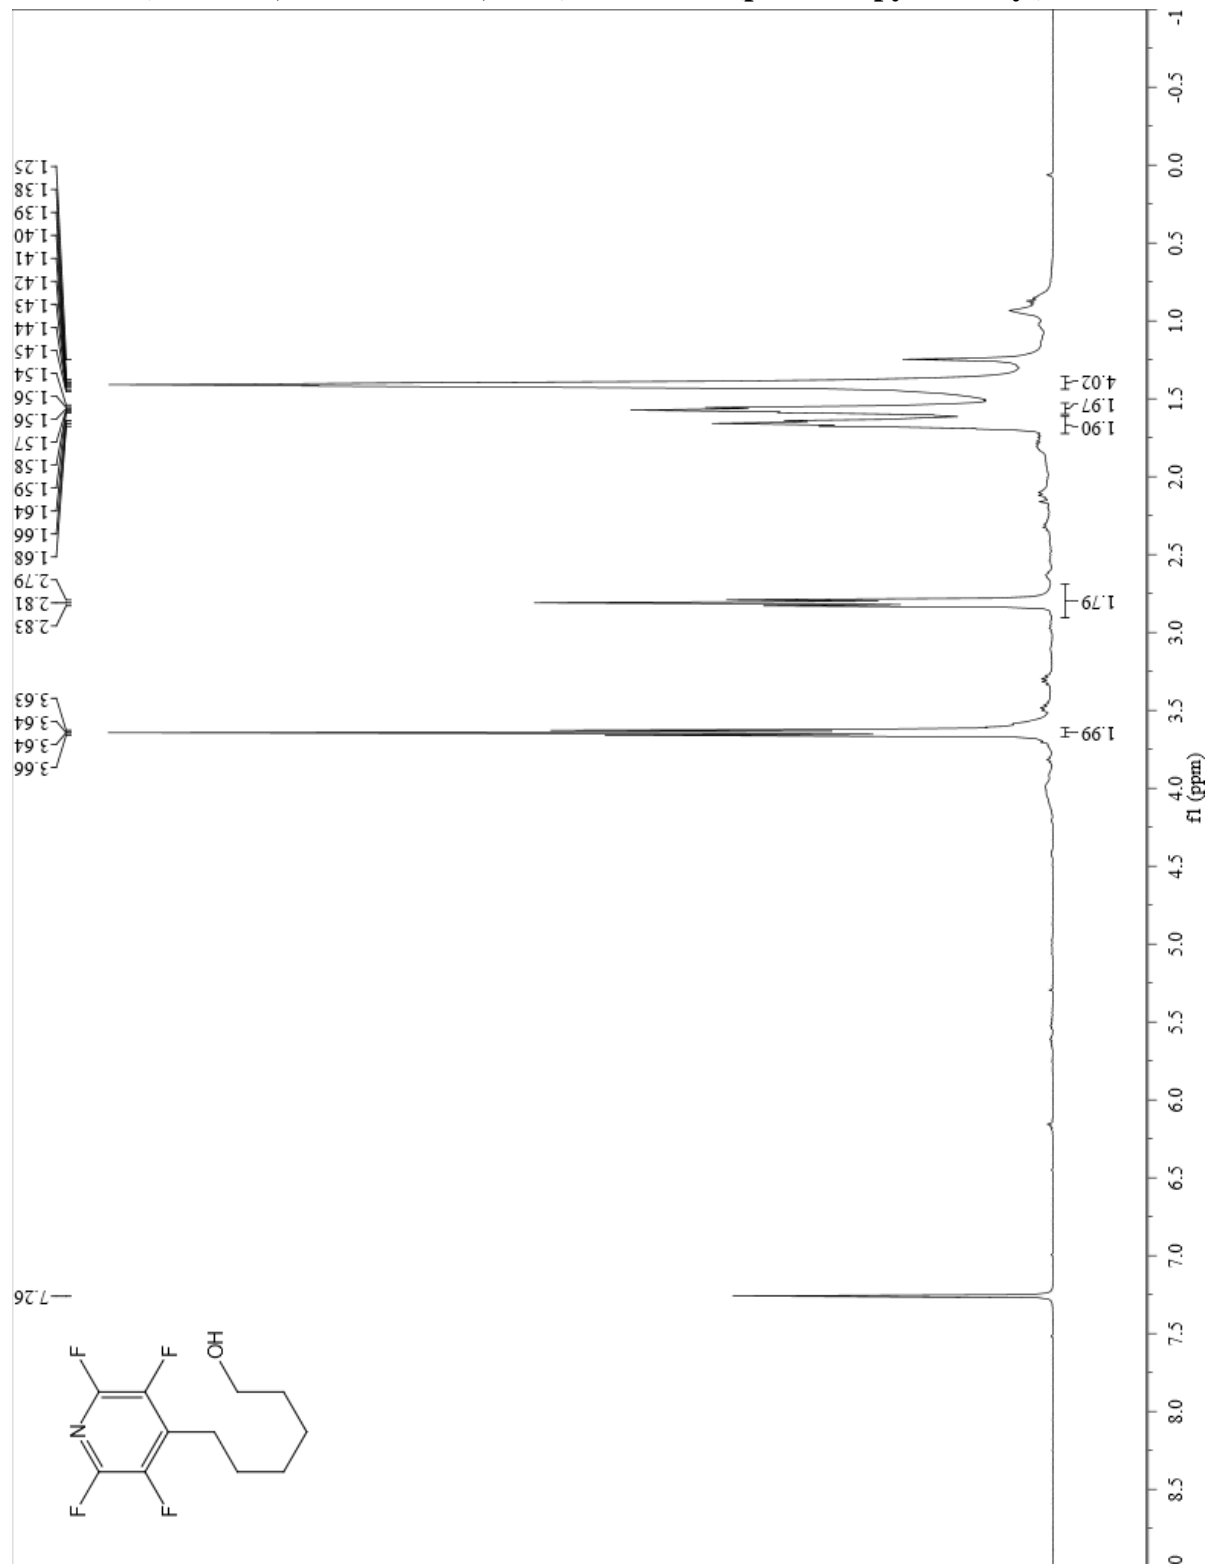

$^{13}\text{C}\{^1\text{H}\}$  NMR (101 MHz, Chloroform-*d*, @ rt) of S-11a 6-(perfluoropyridin-4-yl)hexan-1-ol

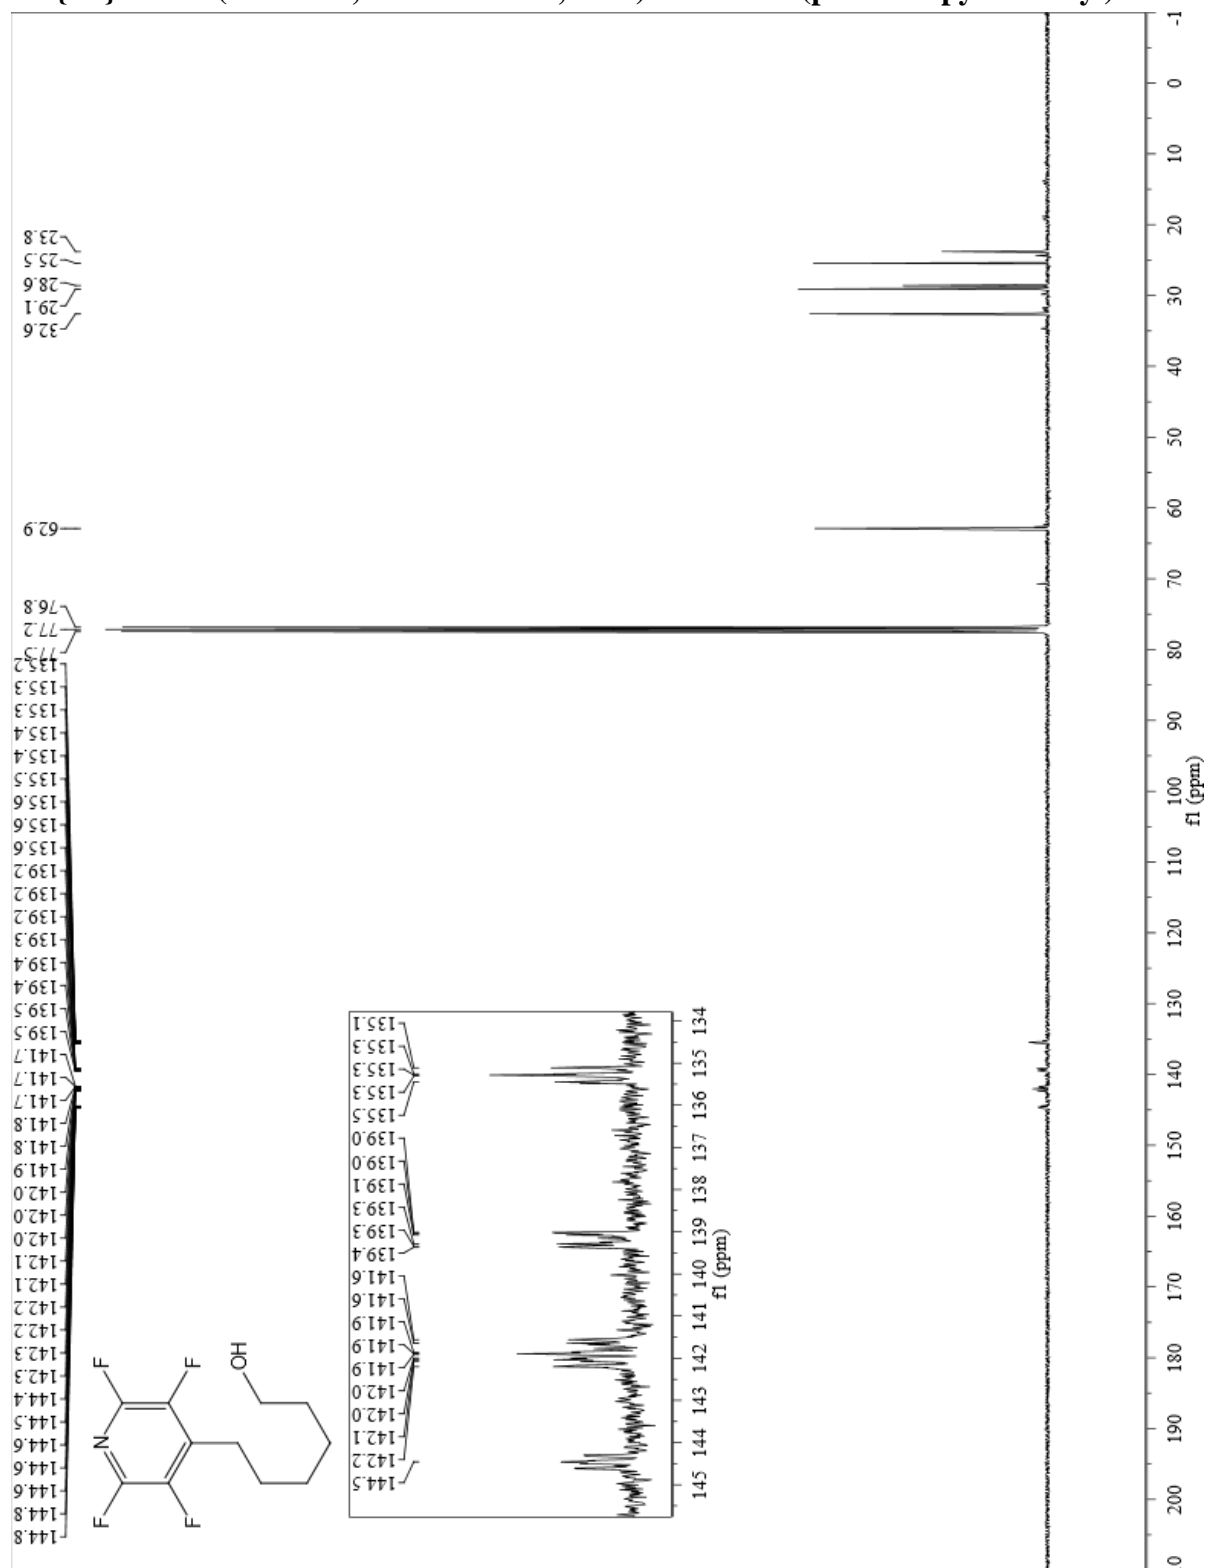

# GC and MS of S-11a 6-(perfluoropyridin-4-yl)hexan-1-ol

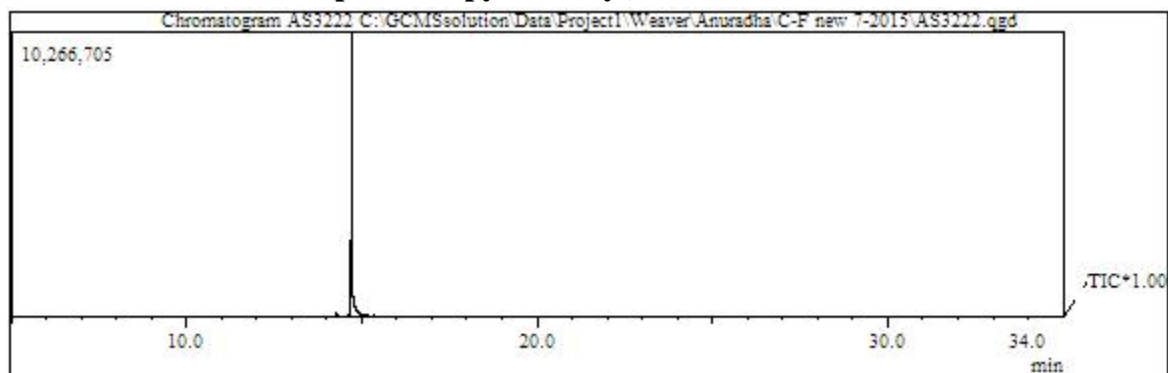

Spectrum

Line# 1 RTime: 14.7(Scan#: 1168)  
MassPeaks: 178  
RawMode: Single 14.7(1168) BasePeak: 41(1914925)  
BG Mode: None

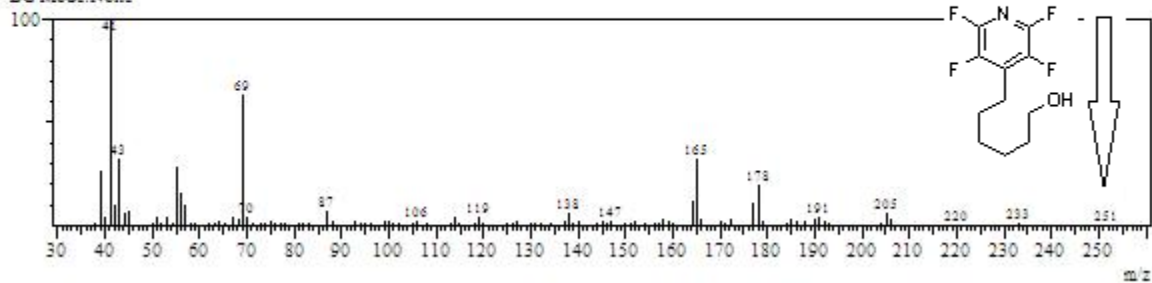

**<sup>19</sup>F NMR of S-12a 3-methyl-2-(perfluoropyridin-3-yl)butan-1-ol (376 MHz, Chloroform-*d*, @ rt)**

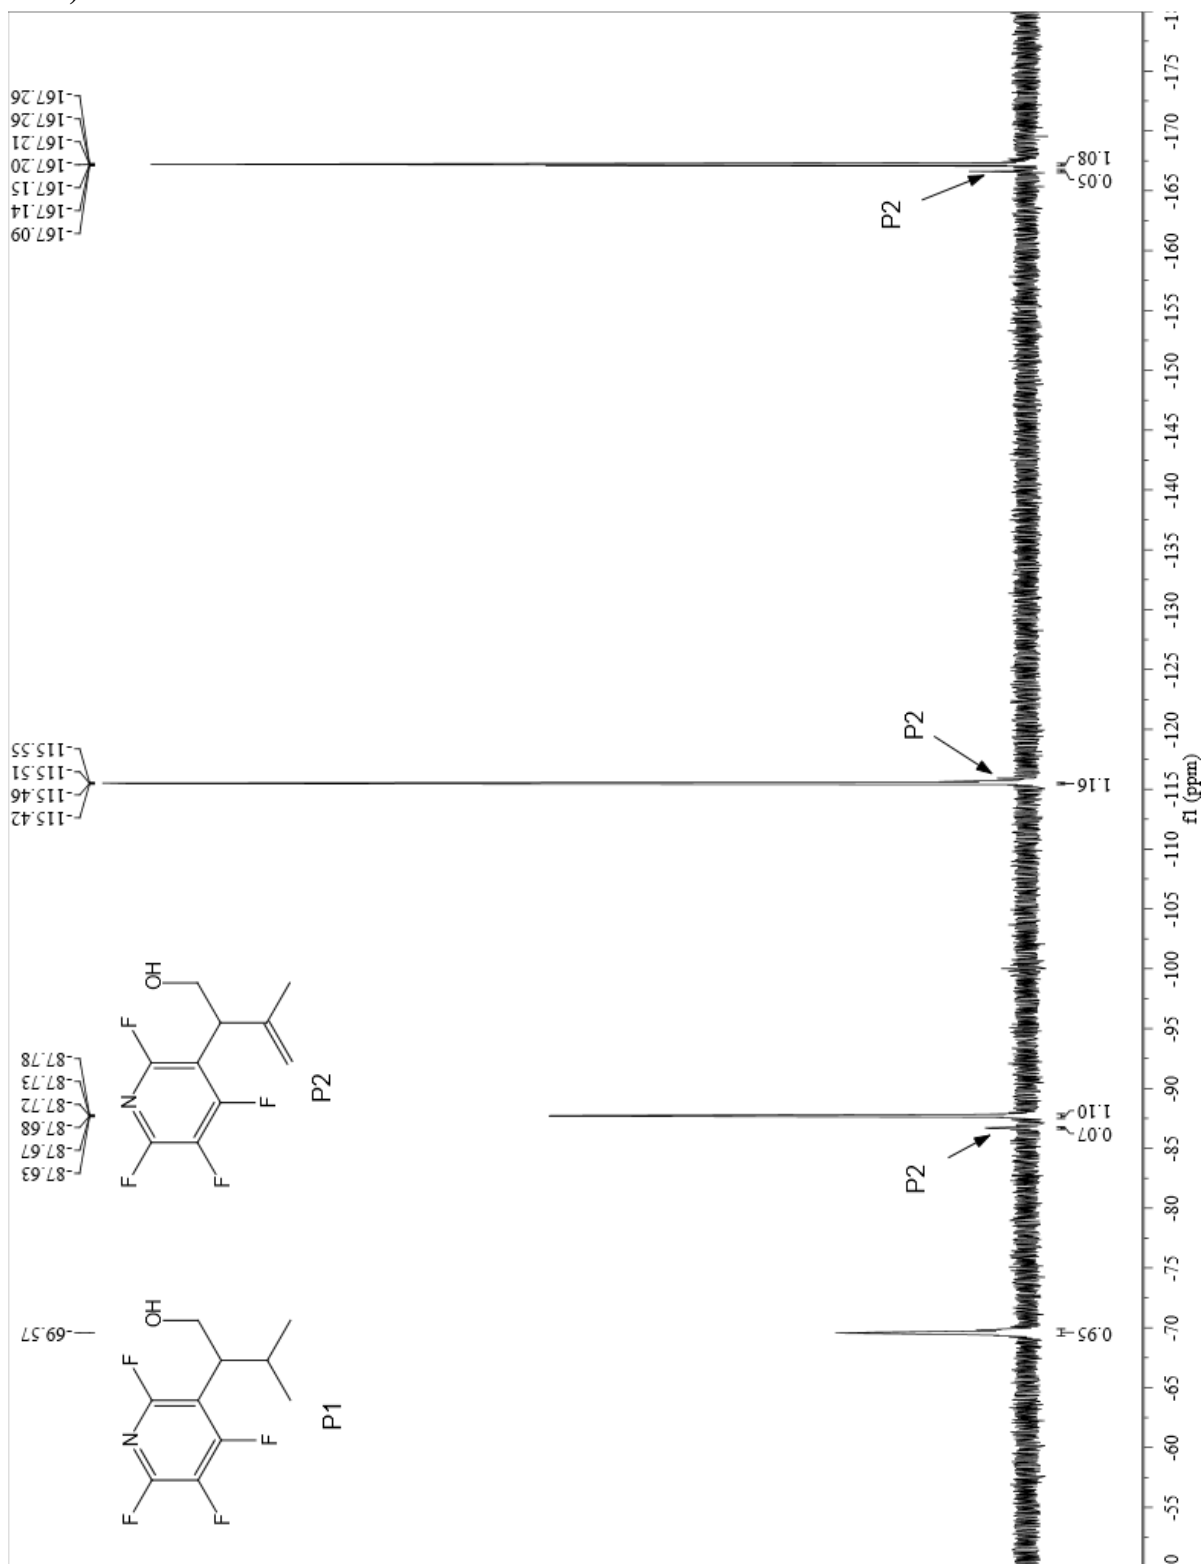

**<sup>1</sup>H NMR (400 MHz, Chloroform-*d*, @ rt) of S-12a 3-methyl-2-(perfluoropyridin-3-yl)butan-1-ol**

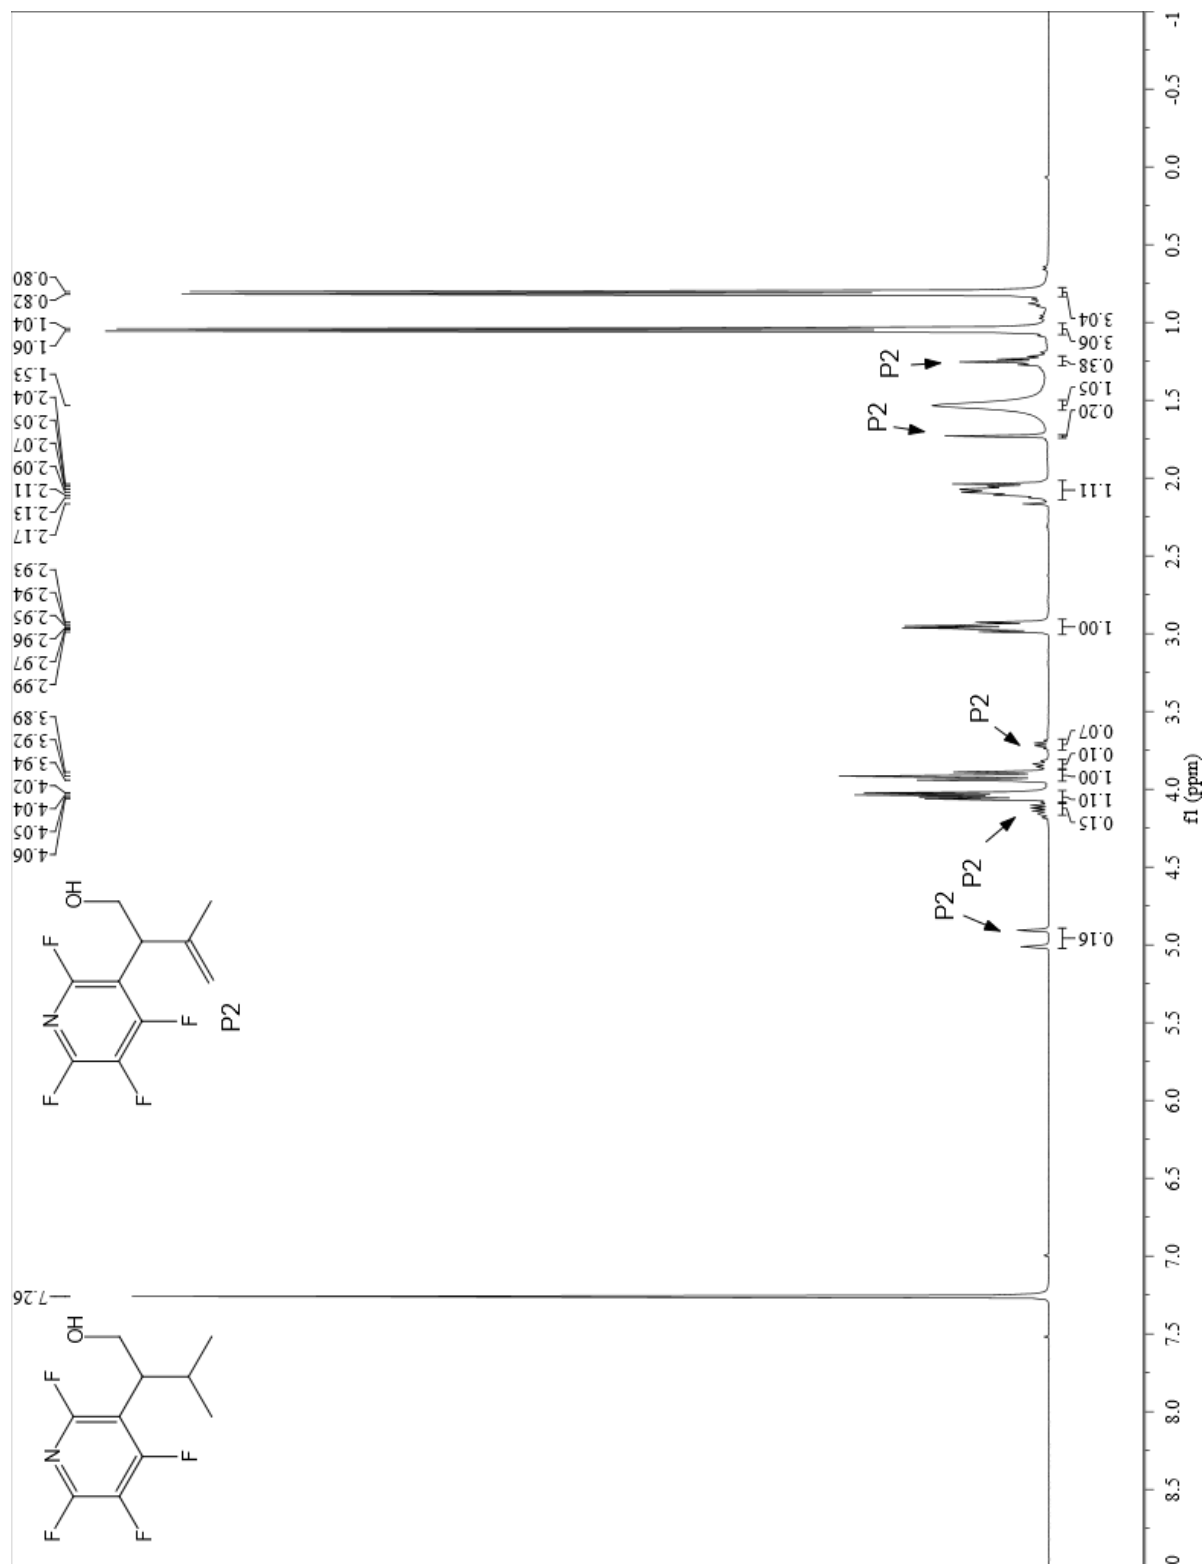

$^{13}\text{C}\{^1\text{H}\}$  NMR (101 MHz, Chloroform-*d*, @ rt) of S-12a 3-methyl-2-(perfluoropyridin-3-yl)butan-1-ol

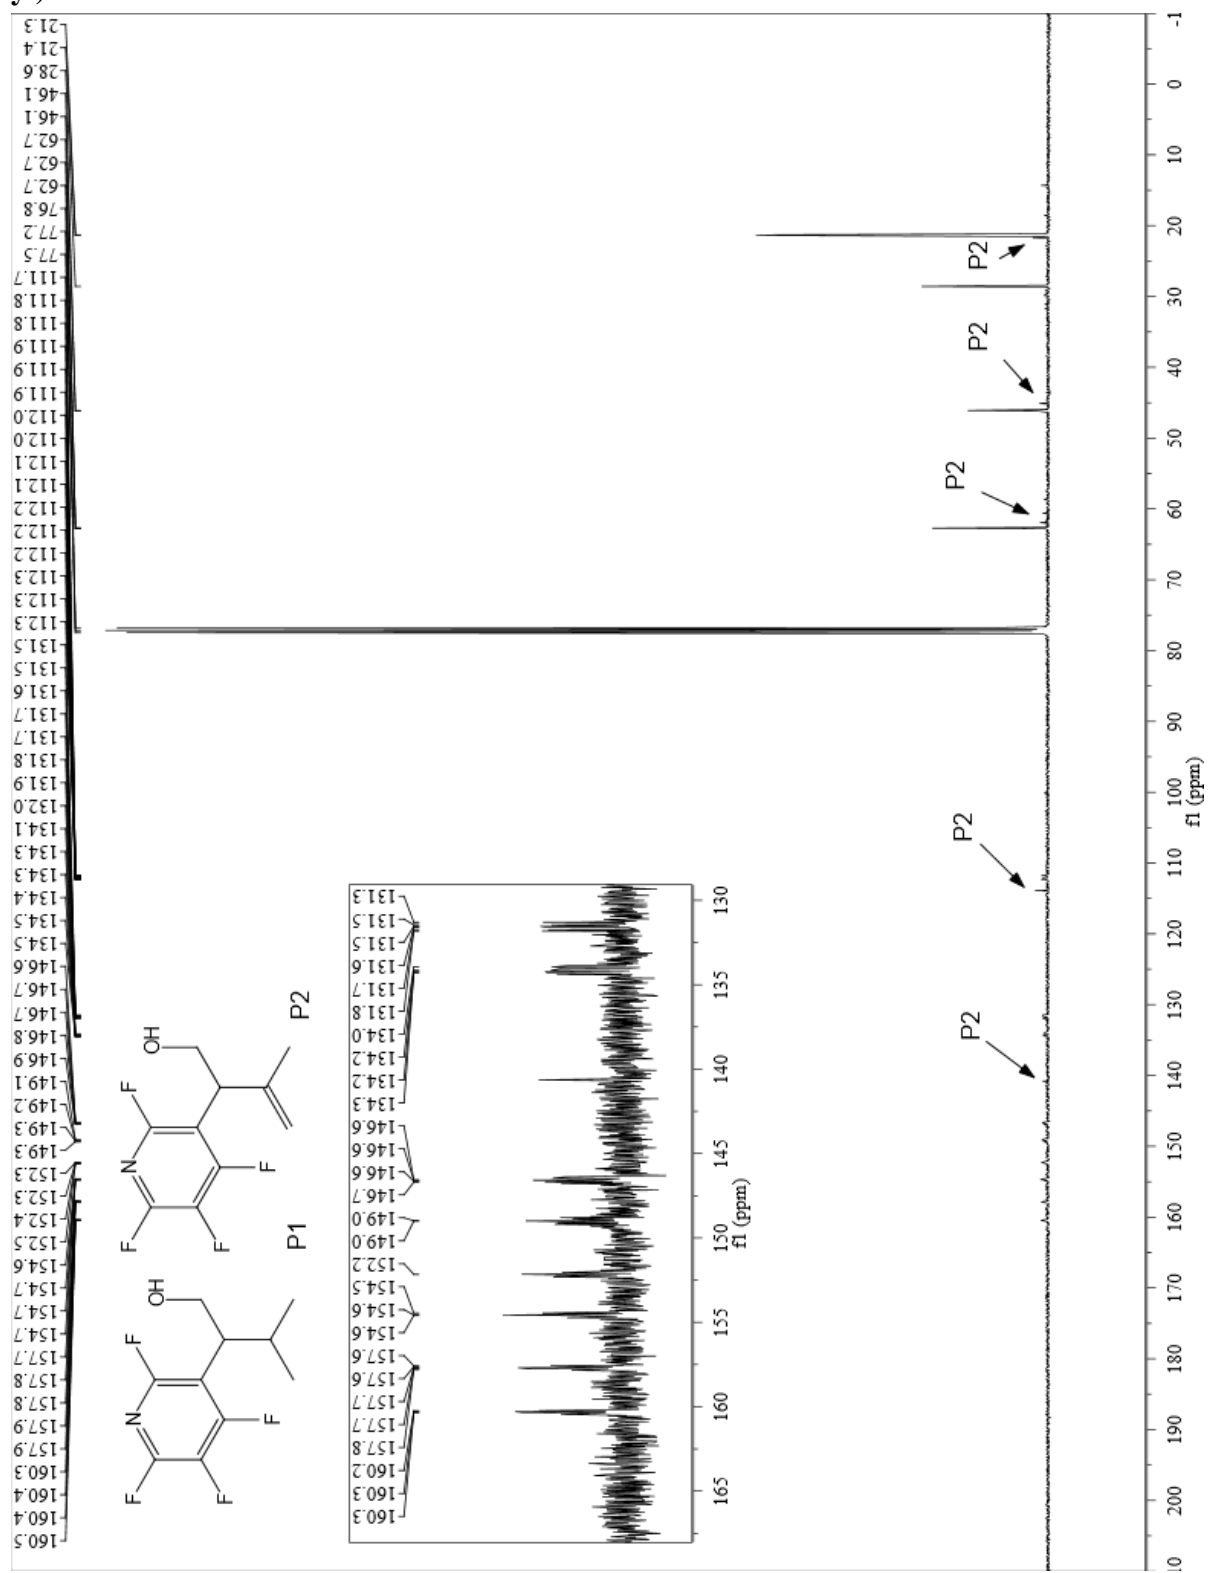

# GC and MS of S-12a 3-methyl-2-(perfluoropyridin-3-yl)butan-1-ol

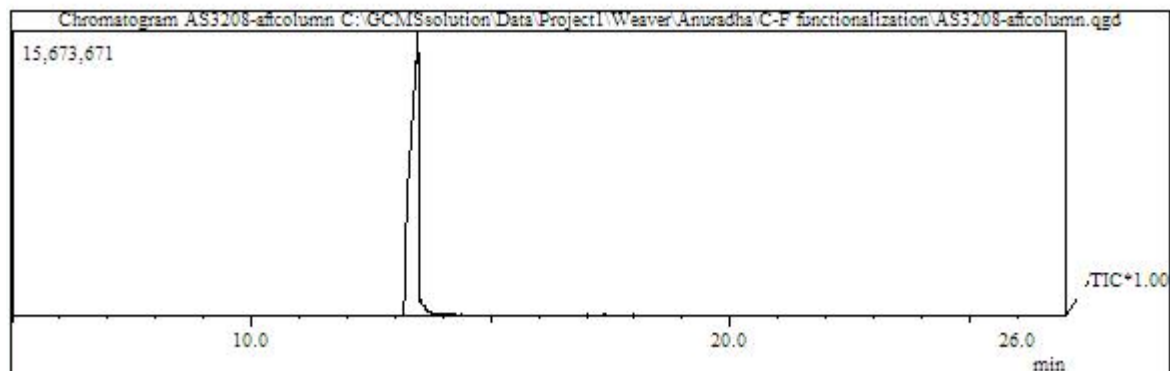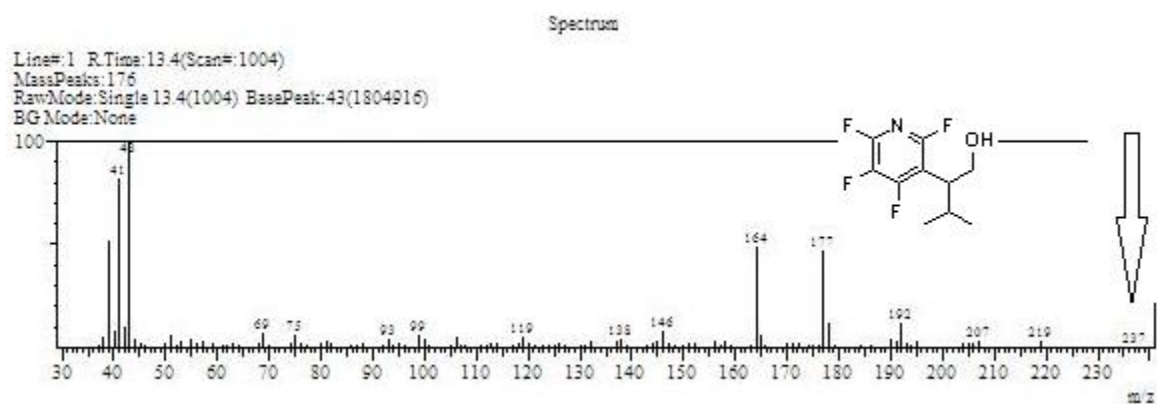

**$^{19}\text{F}$  NMR (376 MHz, Chloroform-*d*, @ rt) of S-13a 4-(6-chlorohexyl)-2,3,5,6-tetrafluoropyridine**

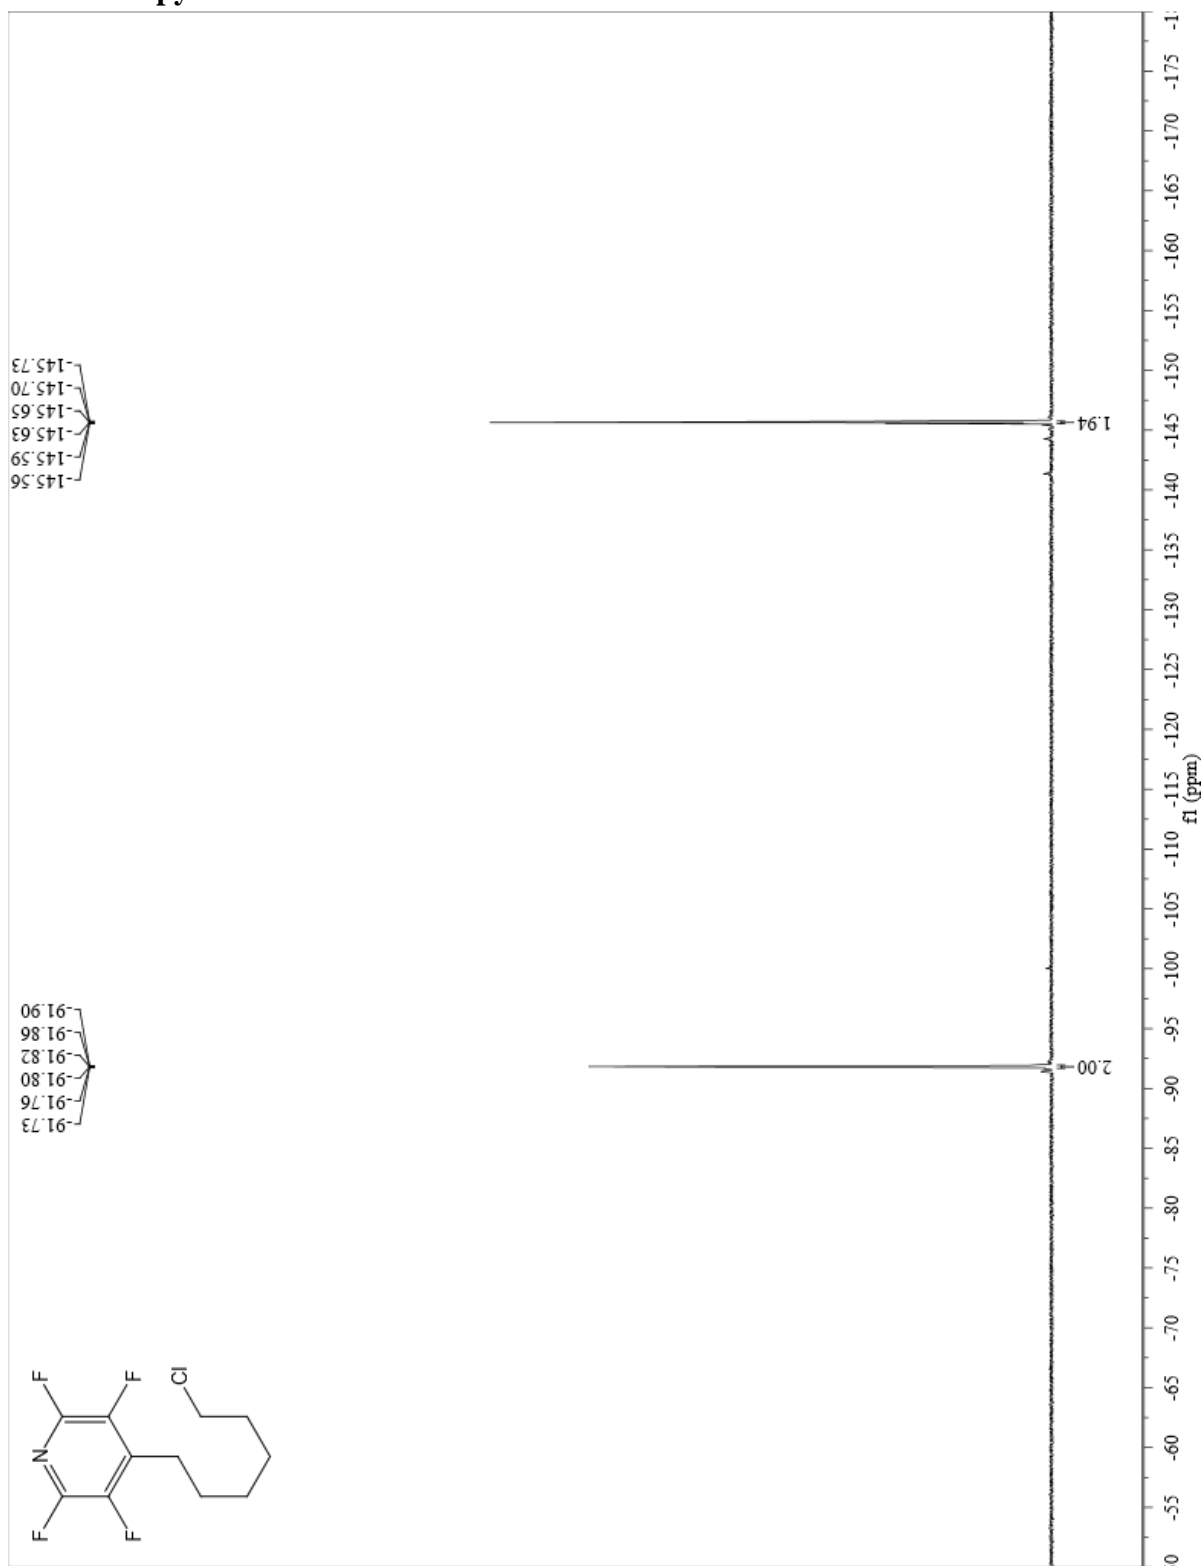



**<sup>1</sup>H NMR (400 MHz, Chloroform-d, @ rt) of S-13a 4-(6-chlorohexyl)-2,3,5,6-tetrafluoropyridine**

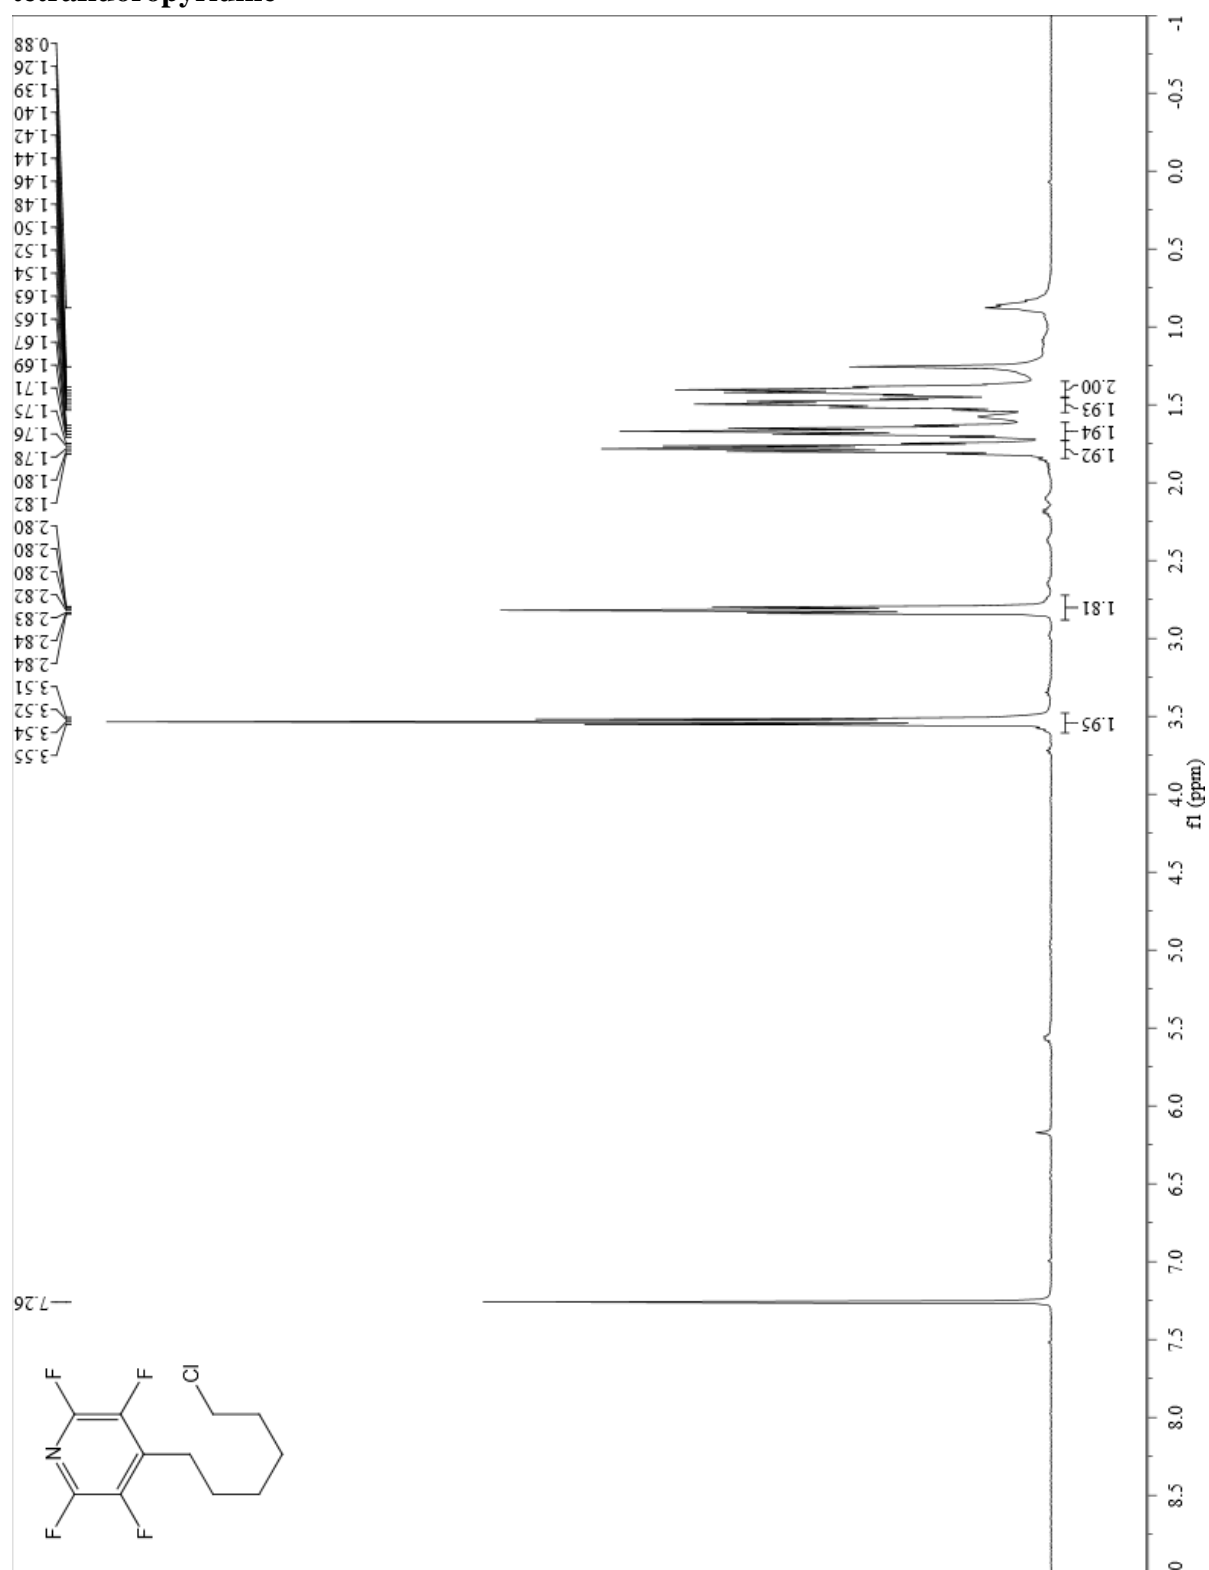

<sup>13</sup>C{<sup>1</sup>H} NMR of (101 MHz, Chloroform-*d*, @ rt) S-13a 4-(6-chlorohexyl)-2,3,5,6-tetrafluoropyridine

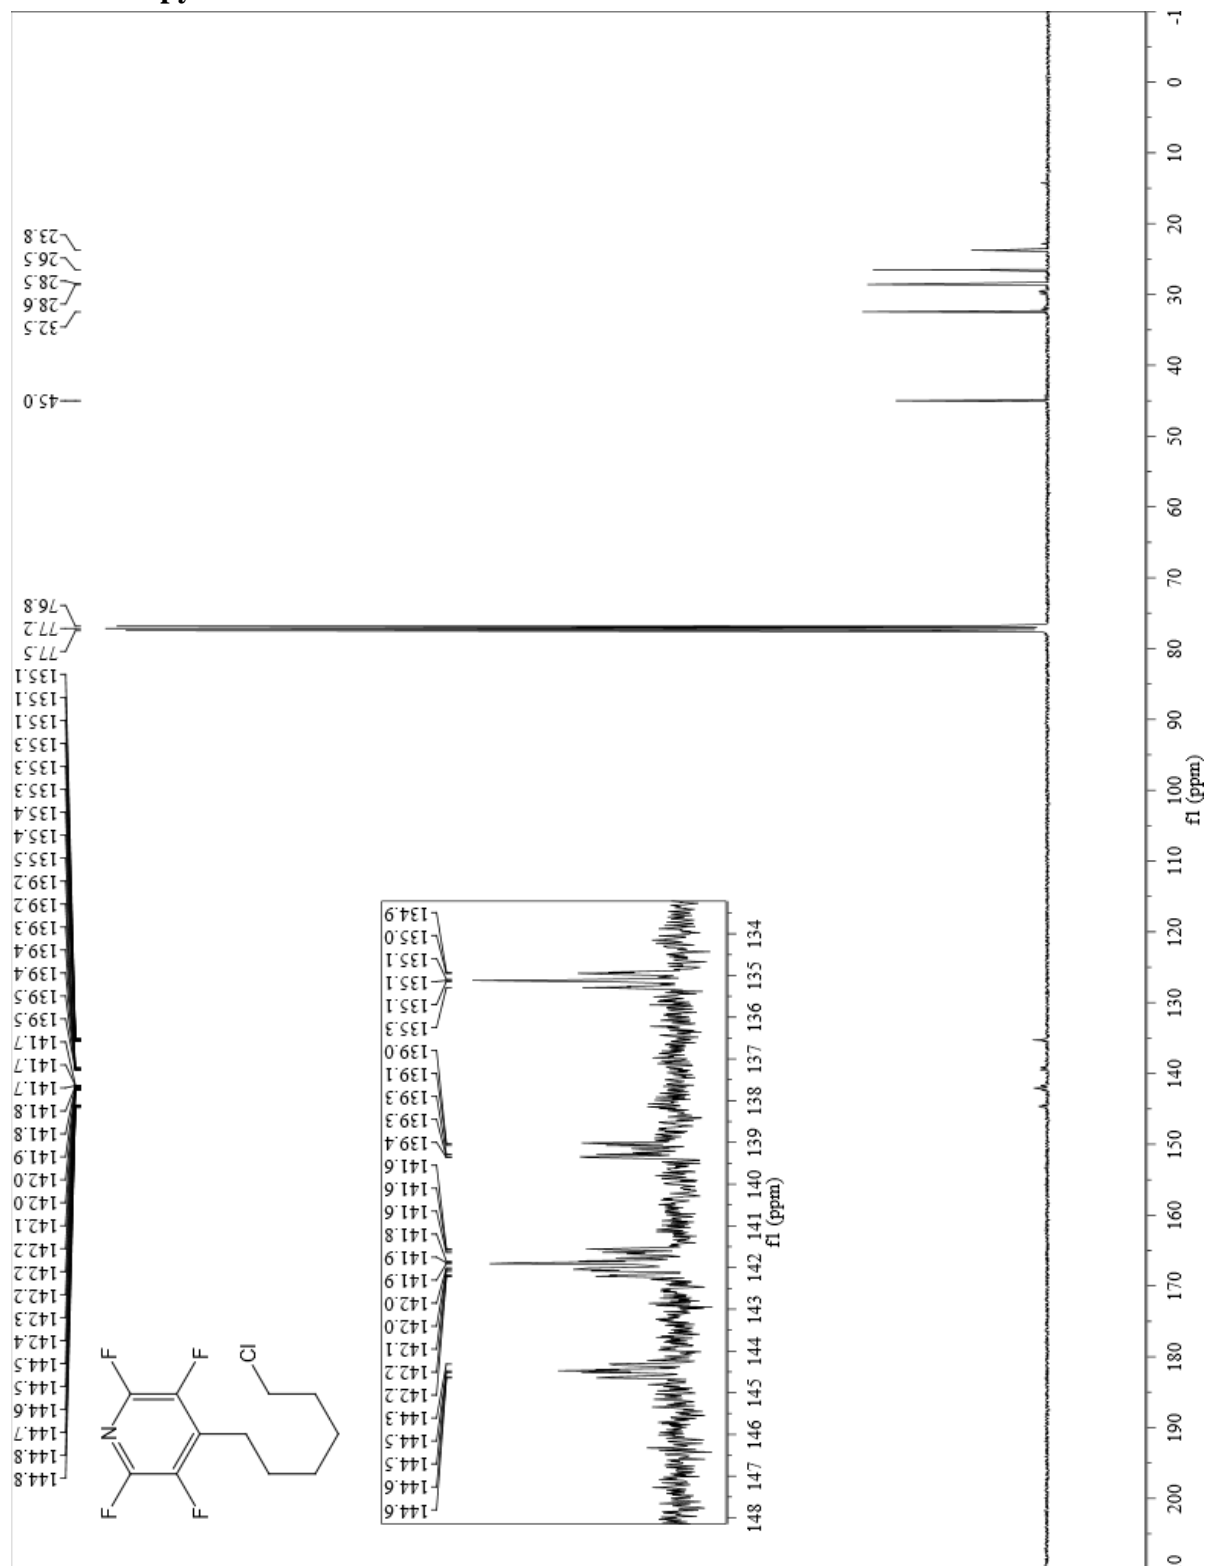

# GC and MS of S-13a 4-(6-chlorohexyl)-2,3,5,6-tetrafluoropyridine

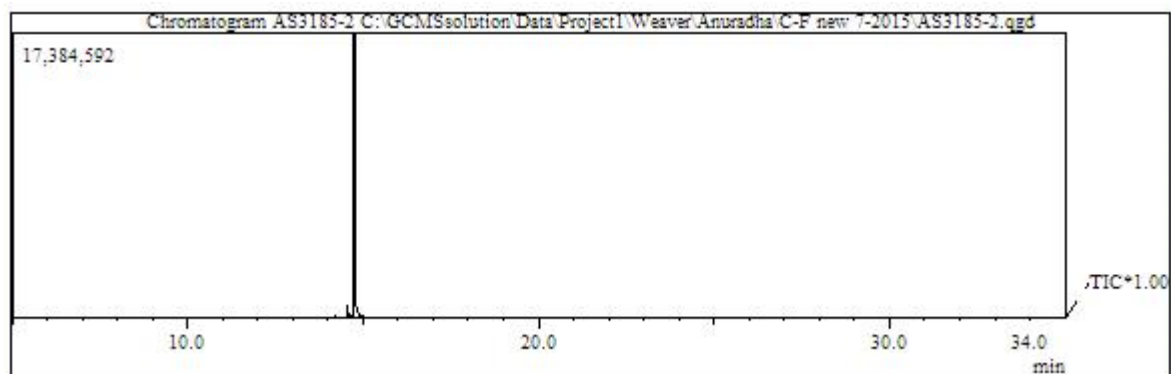

Spectrum

Line#1 RTime:14.8(Scan#:1173)  
MassPeaks:180  
RawMode:Single 14.8(1173) BasePeak:41(4432154)  
BG Mode:None

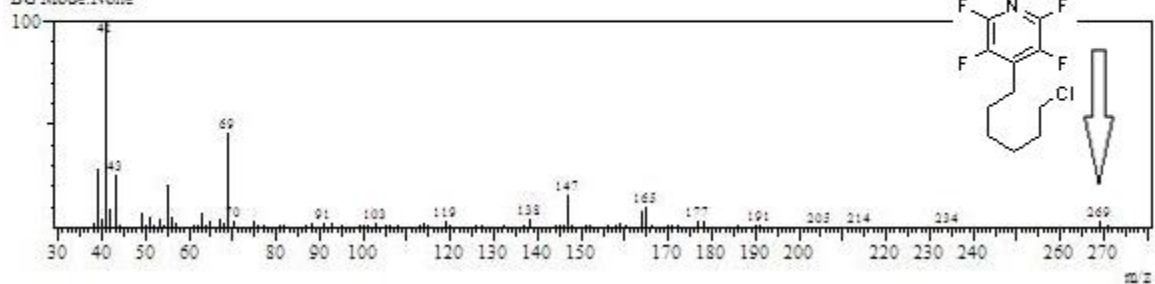

**<sup>19</sup>F NMR (376 MHz, Chloroform-*d*, @ rt) of S-14a 3-methyl-2-(perfluorophenyl)butan-1-ol**

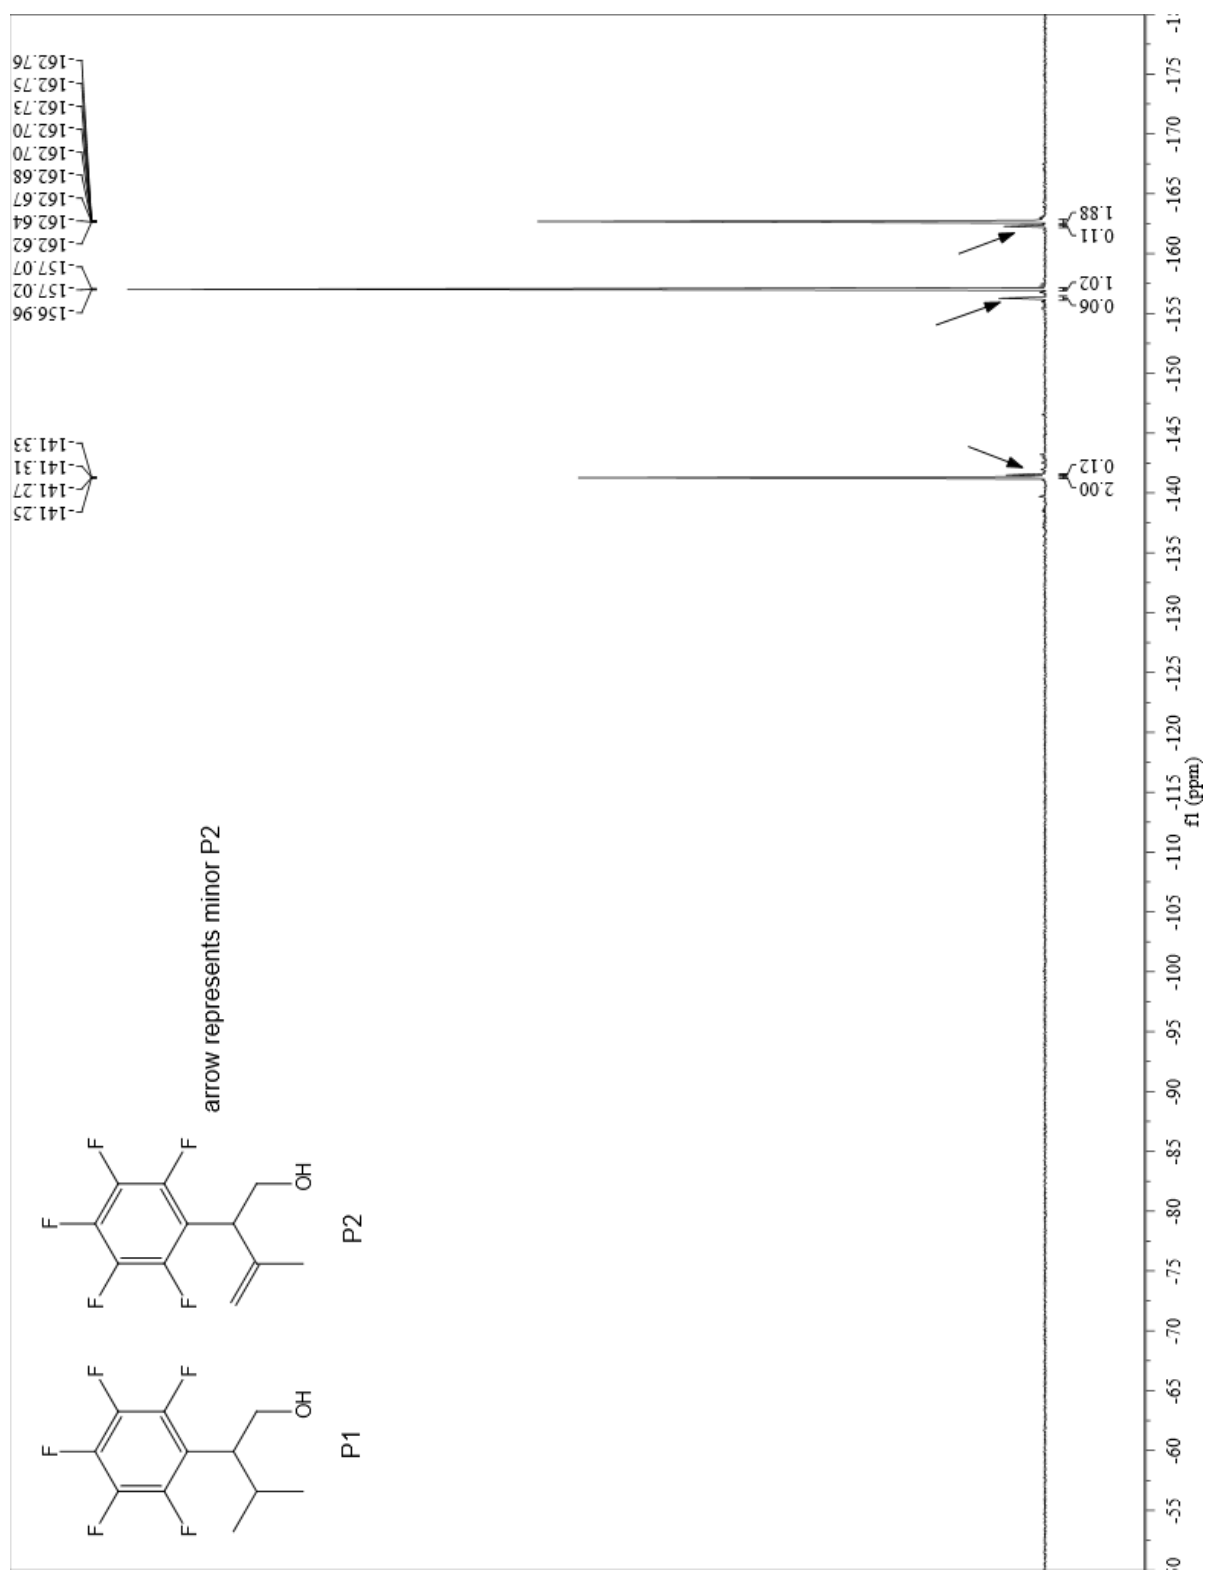

**<sup>1</sup>H NMR (400 MHz, Chloroform-*d*, @ rt) of S-14a 3-methyl-2-(perfluorophenyl)butan-1-ol**

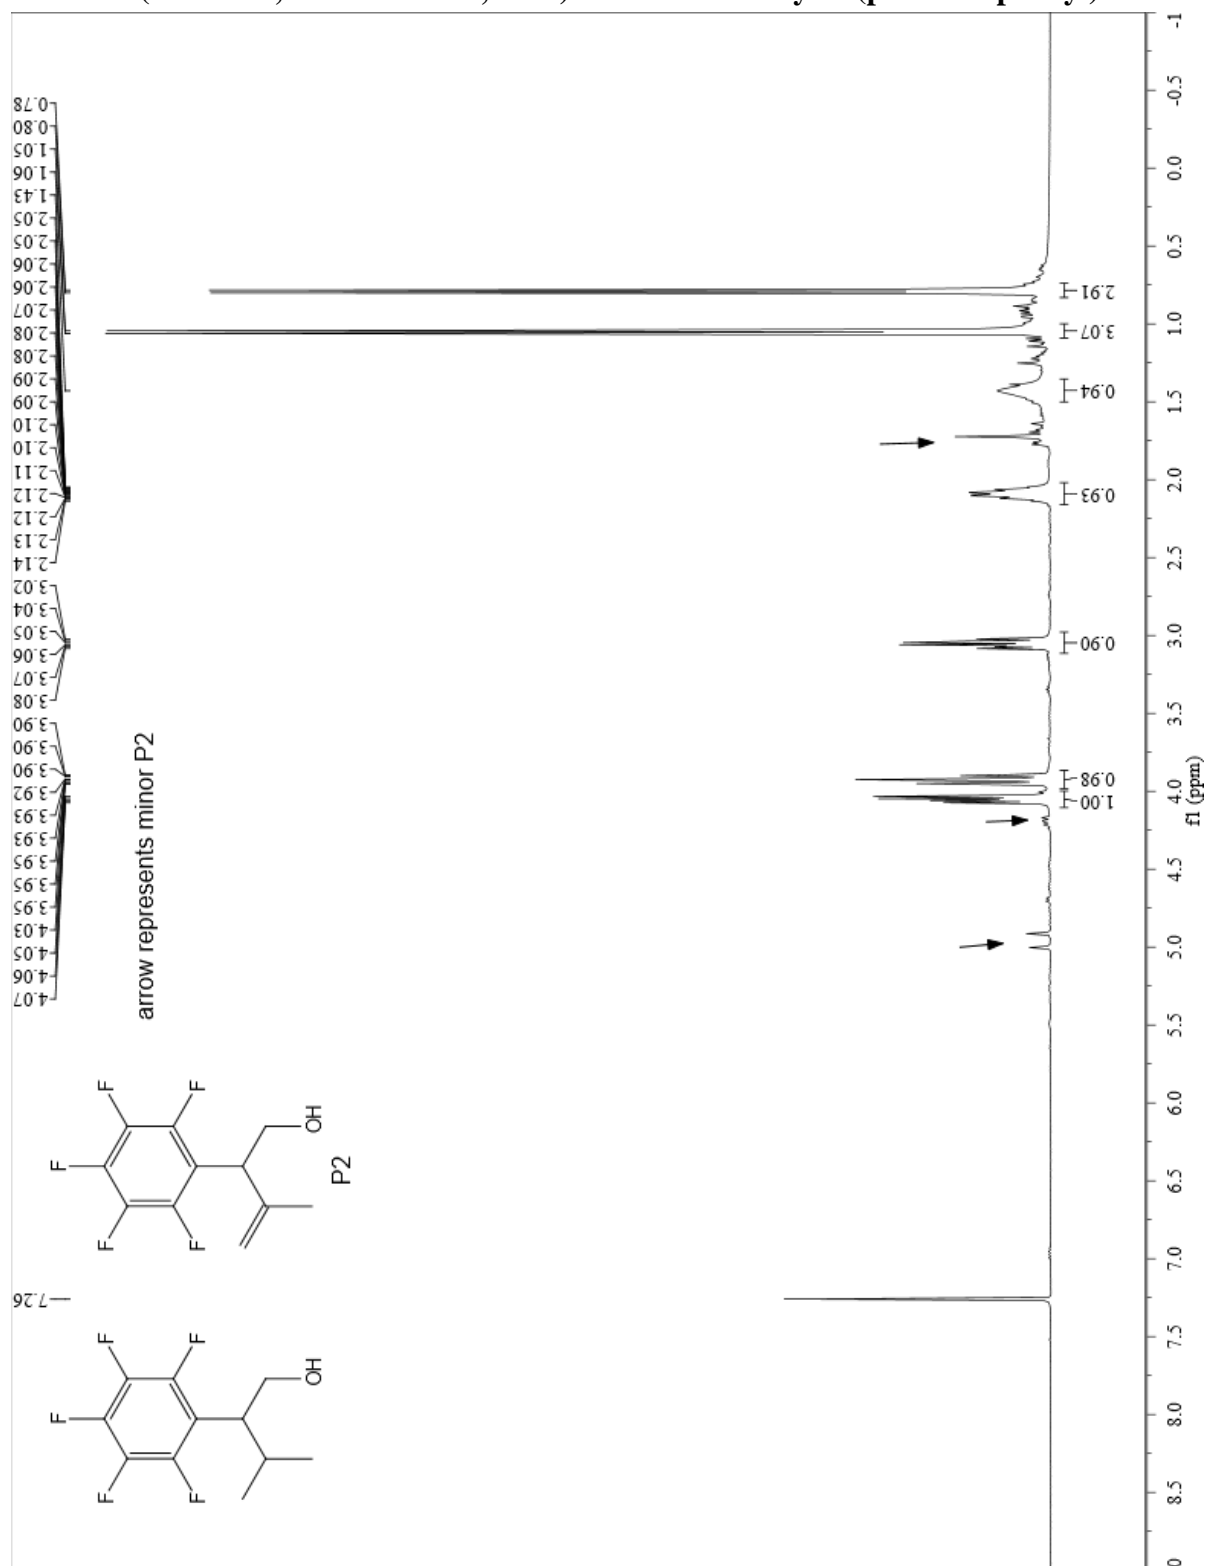

**$^{13}\text{C}\{^1\text{H}\}$  NMR (101 MHz, Chloroform-*d*, @ rt) of S-14a 3-methyl-2-(perfluorophenyl)butan-1-ol**

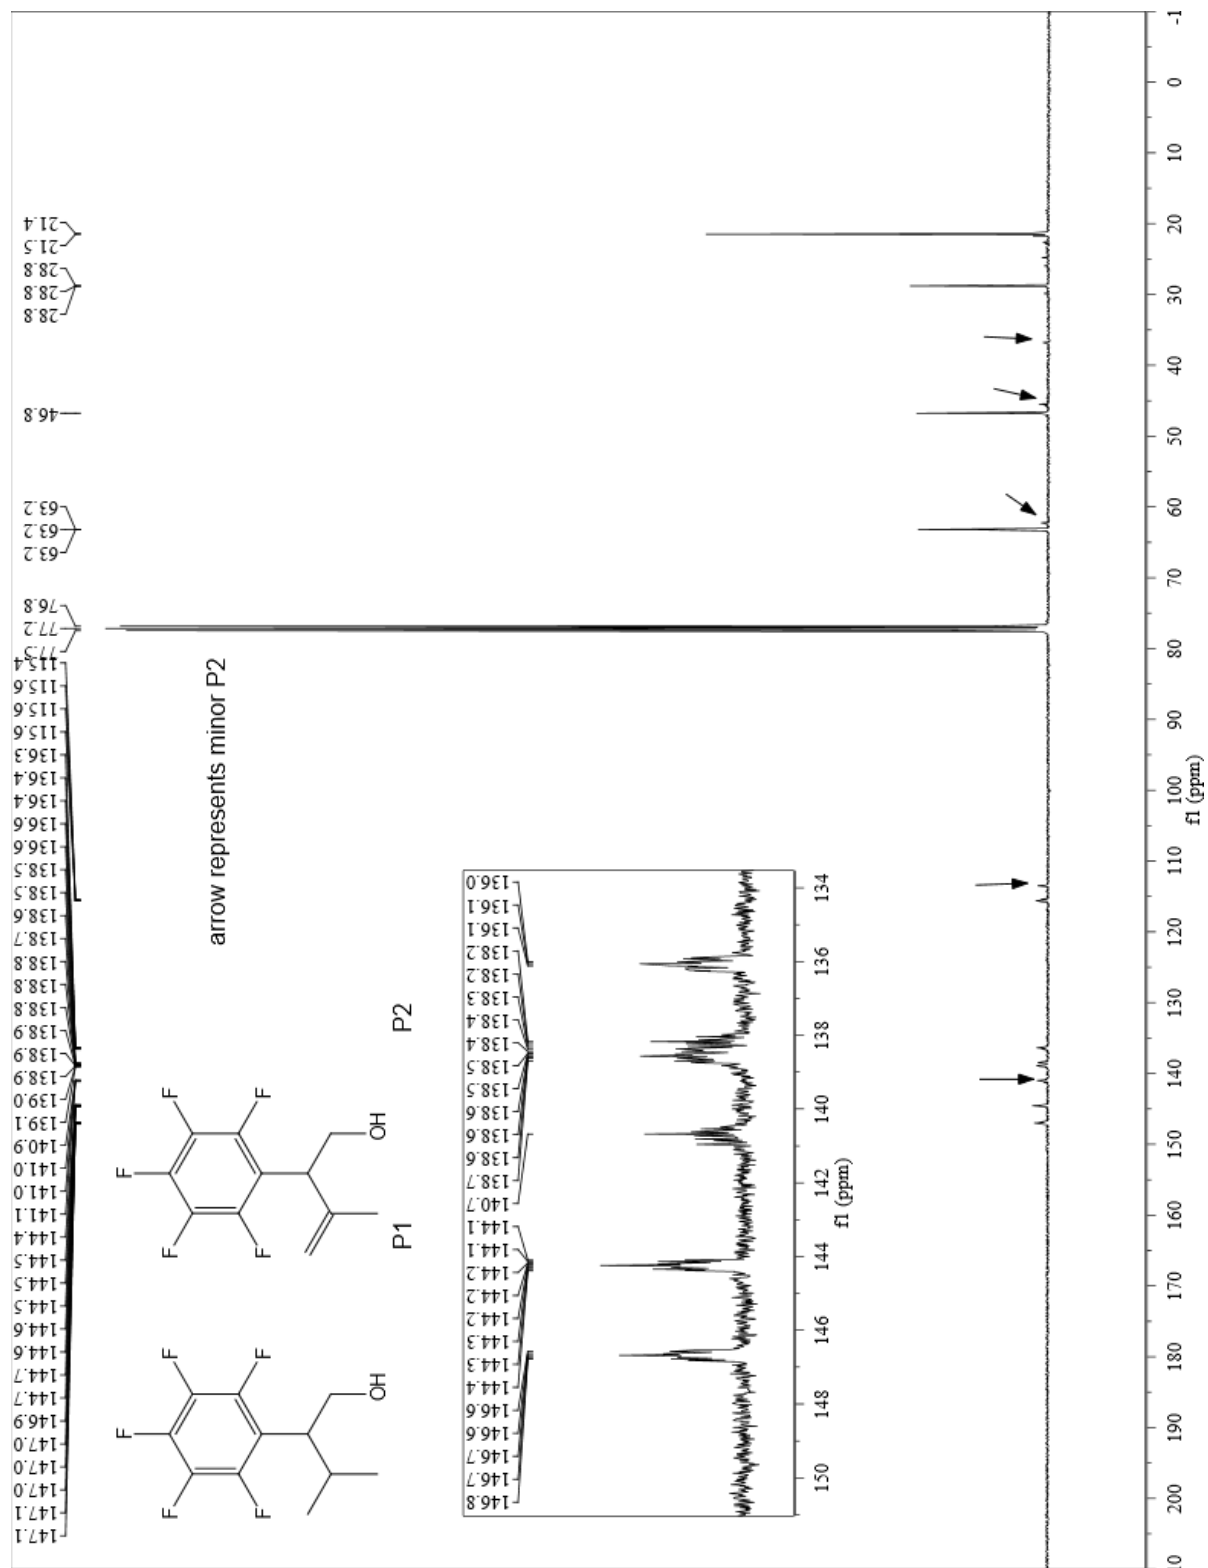

## GC and MS of S-14a 3-methyl-2-(perfluorophenyl)butan-1-ol

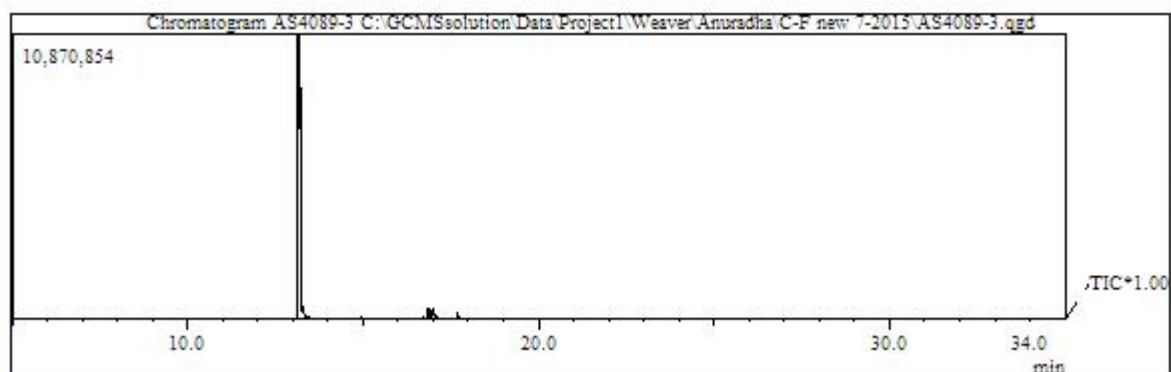

Spectrum

Line#: 1 R.Time: 13.1 (Scan#: 978)  
MassPeaks: 177  
RawMode: Single 13.1 (978) BasePeak: 43 (1635555)  
BG Mode: None

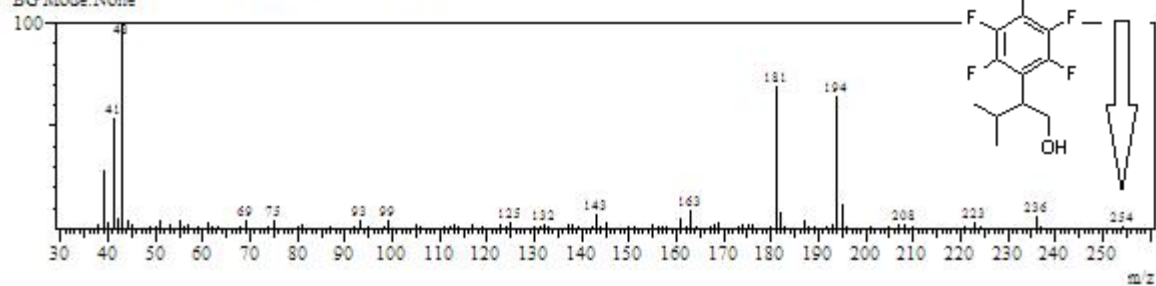

**<sup>19</sup>F NMR (376 MHz, Chloroform-*d*, @ rt) of S-15a 4-(bicyclo[2.2.1]heptan-2-yl)-2,3,5,6-tetrafluoropyridine**

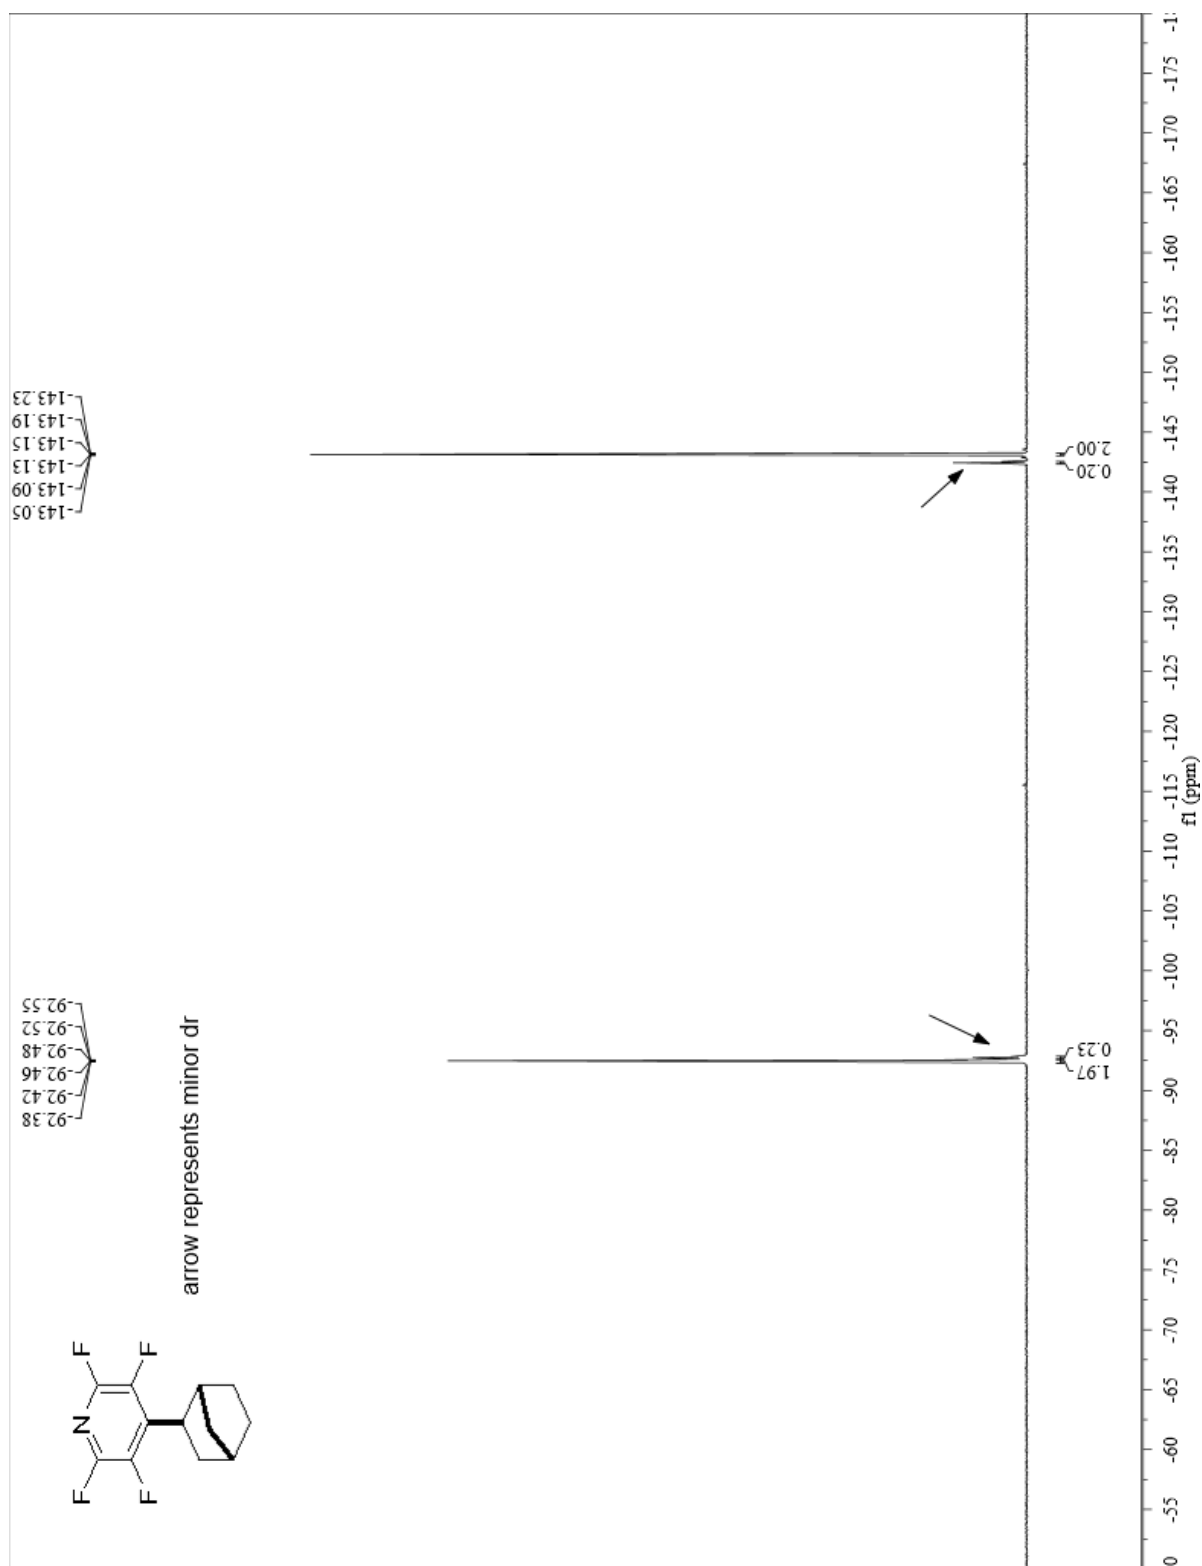



**<sup>1</sup>H NMR (400 MHz, Chloroform-*d*, @ rt) of S-15a 4-(bicyclo[2.2.1]heptan-2-yl)-2,3,5,6-tetrafluoropyridine**

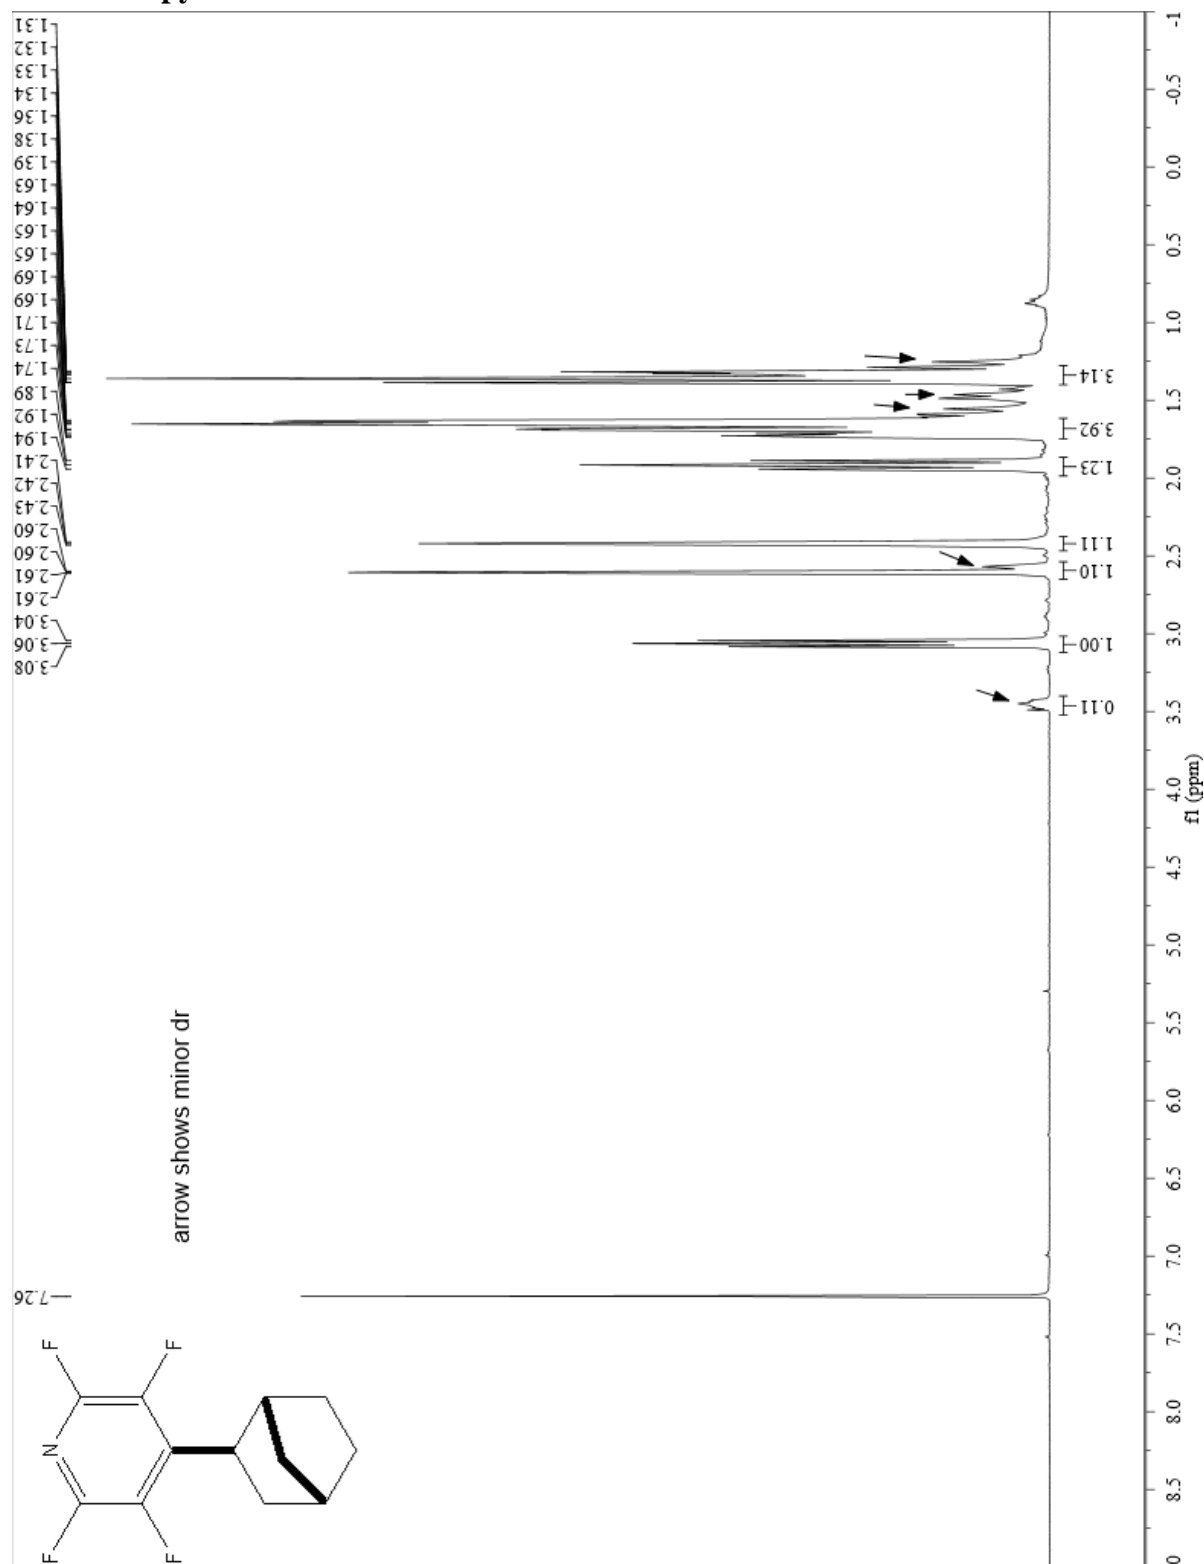

**$^{13}\text{C}\{^1\text{H}\}$  NMR (101 MHz, Chloroform-*d*, @ rt) of S-15a 4-(bicyclo[2.2.1]heptan-2-yl)-2,3,5,6-tetrafluoropyridine**

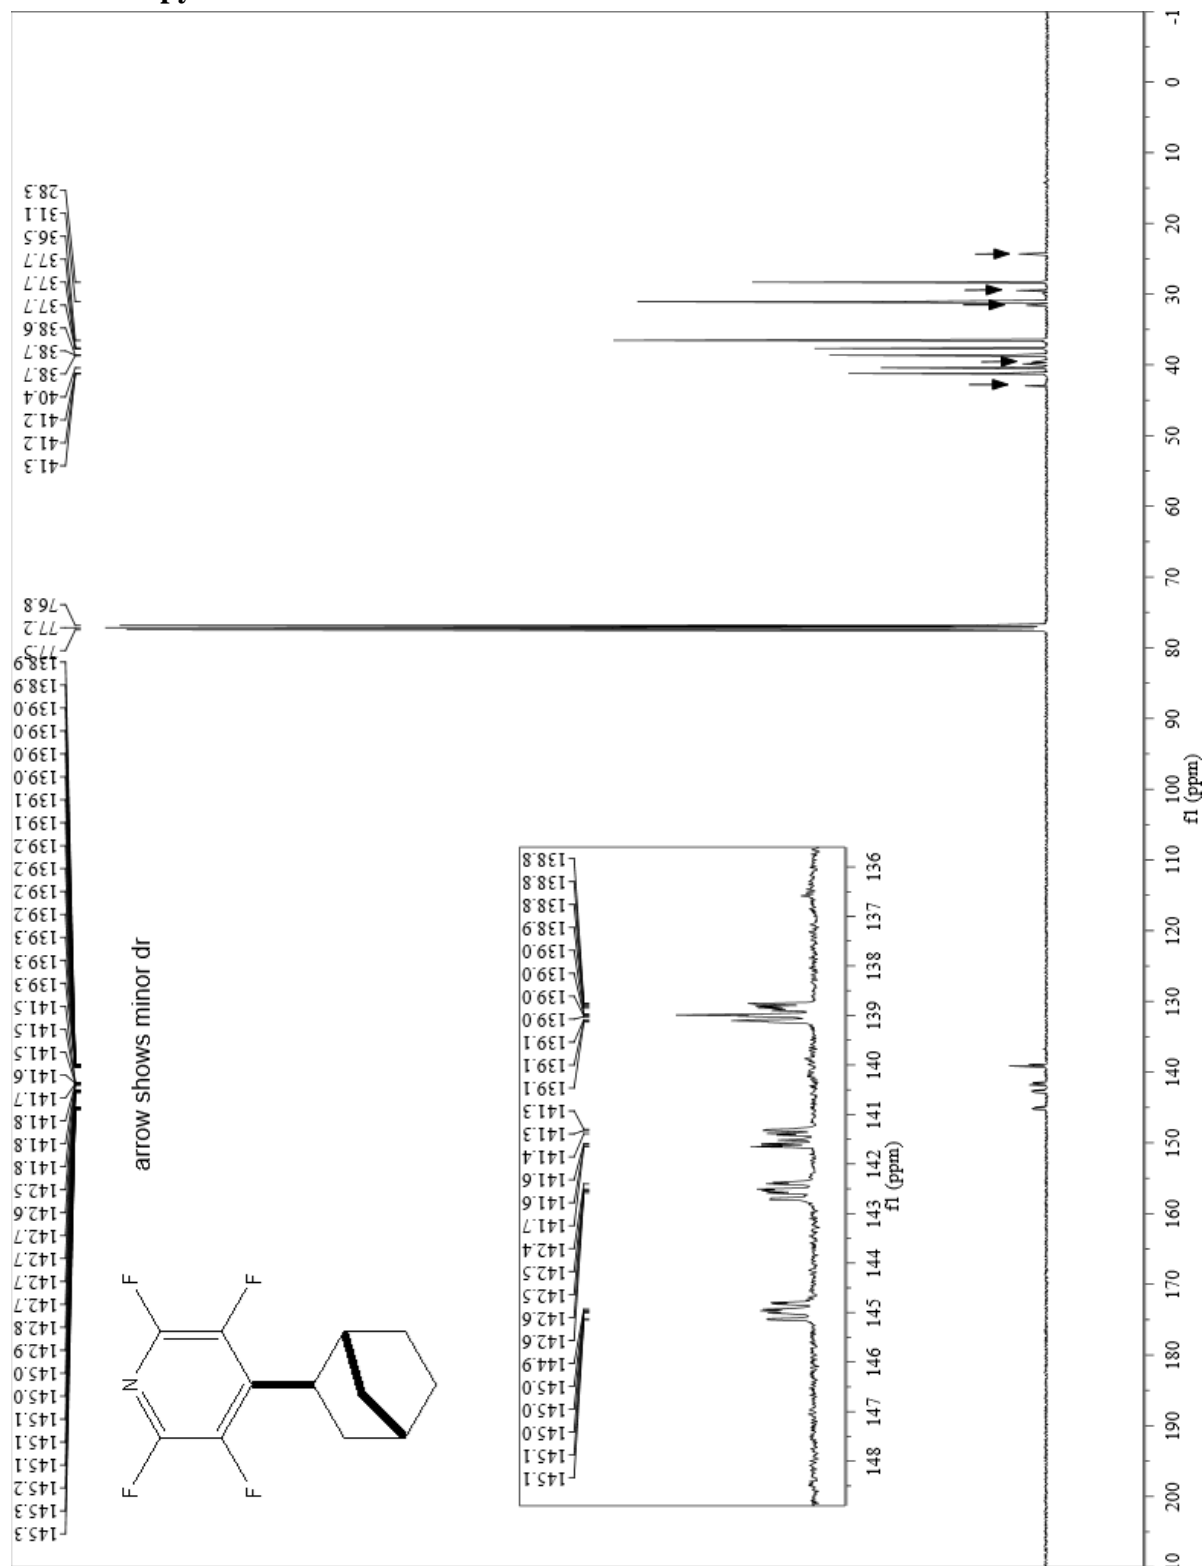

# GC and MS of S-15a 4-(bicyclo[2.2.1]heptan-2-yl)-2,3,5,6-tetrafluoropyridine

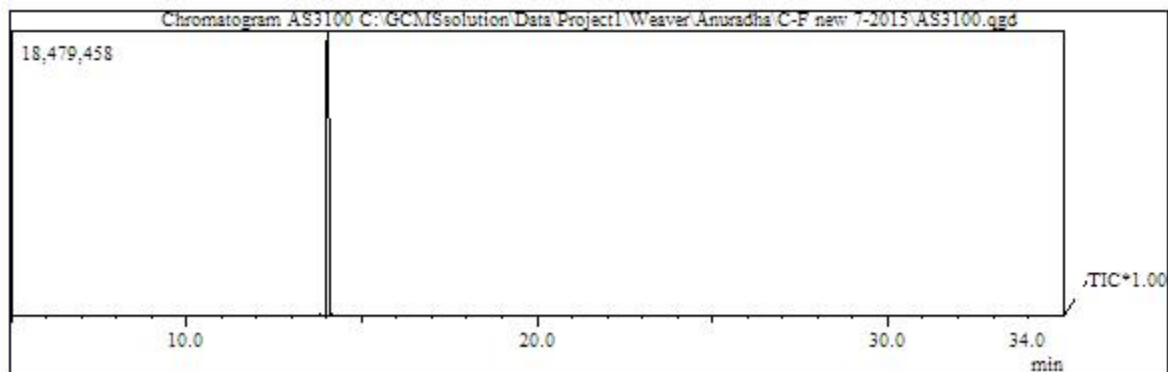

Spectrum

Line#:1 R.Time:14.0(Scan#:1084)

MassPeaks:186

RawMode:Single 14.0(1084) BasePeak:68(4425902)

BG Mode:None

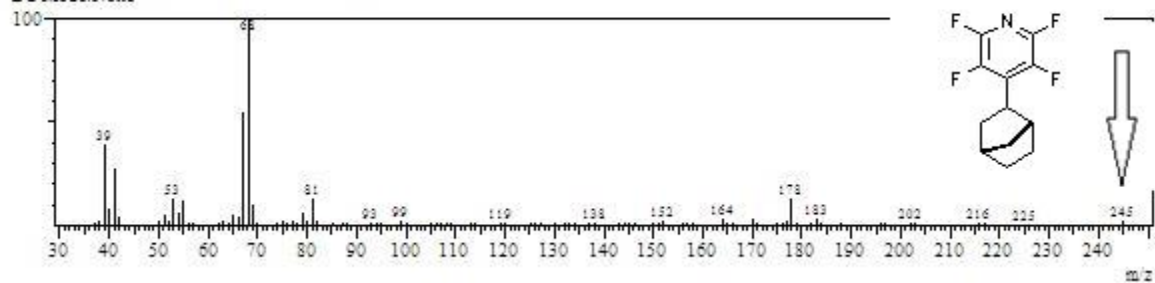

**<sup>19</sup>F NMR (376 MHz, Chloroform-*d*, @ rt) of S-16a dimethyl 5-(perfluoropyridin-4-yl)-7-oxabicyclo[2.2.1]heptane-2,3-dicarboxylate**

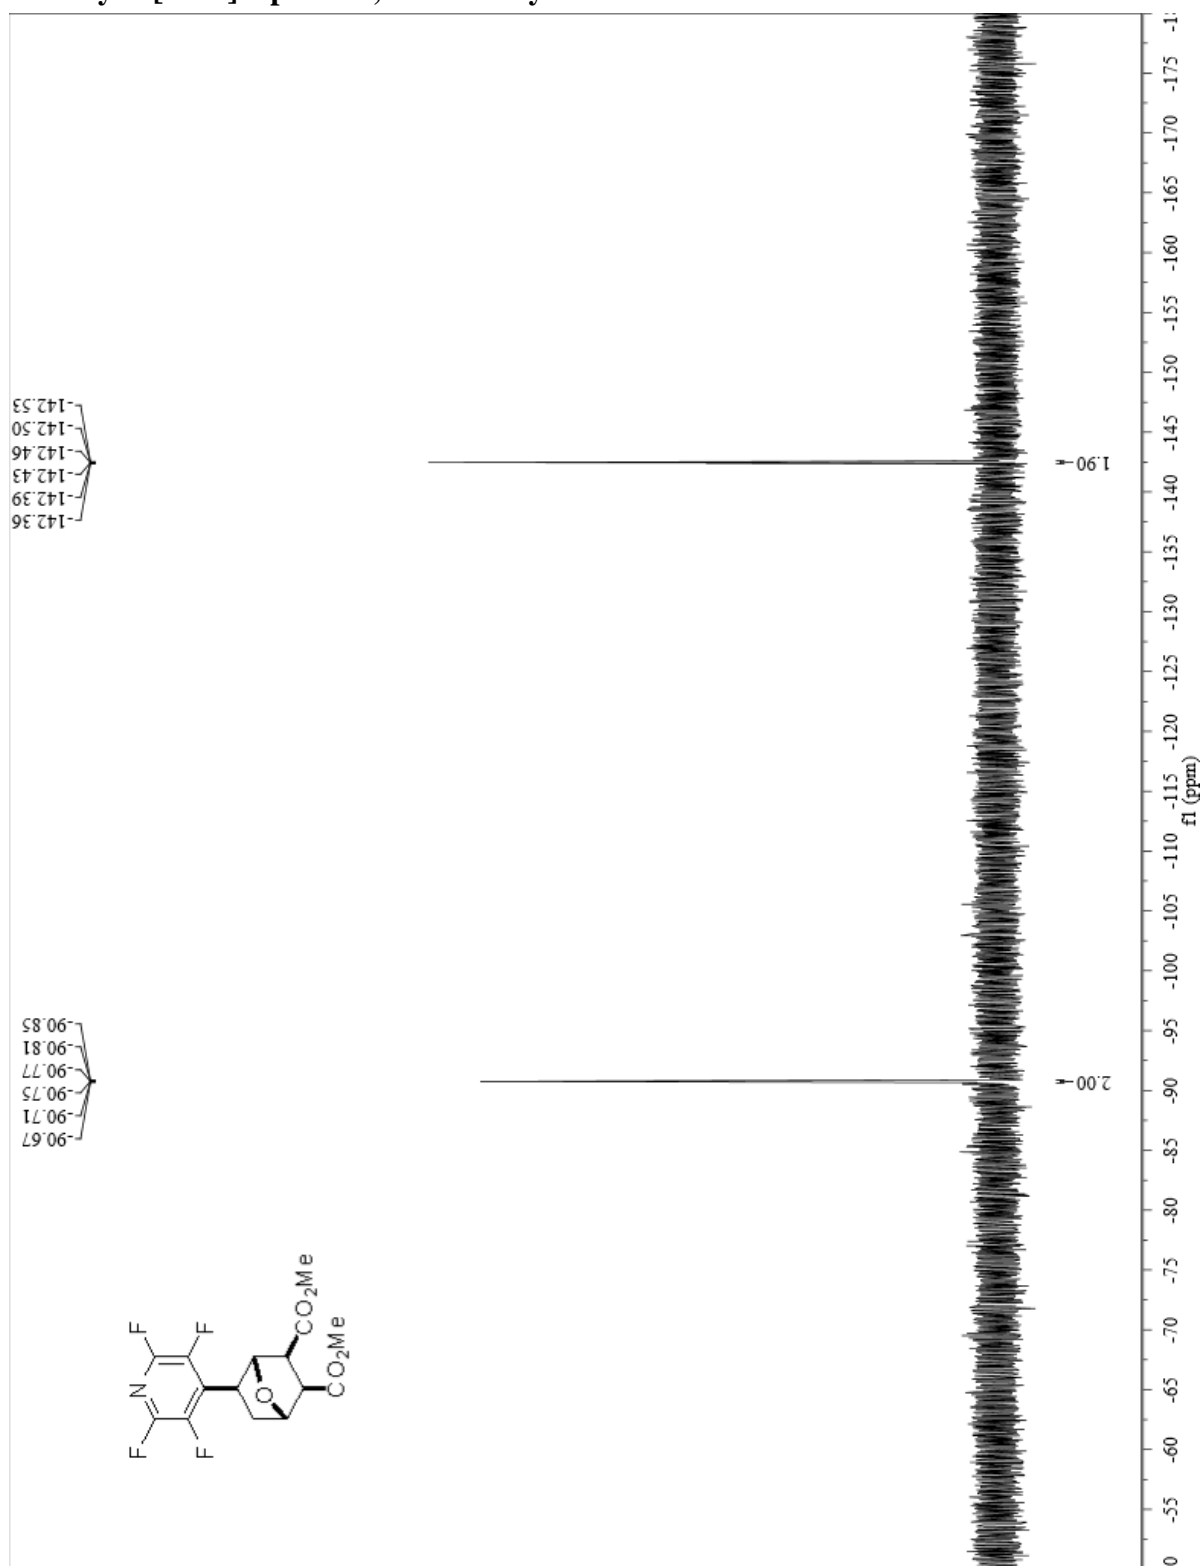

**<sup>1</sup>H NMR (400 MHz, Chloroform-*d*, @ rt) of S-16a dimethyl 5-(perfluoropyridin-4-yl)-7-oxabicyclo[2.2.1]heptane-2,3-dicarboxylate**

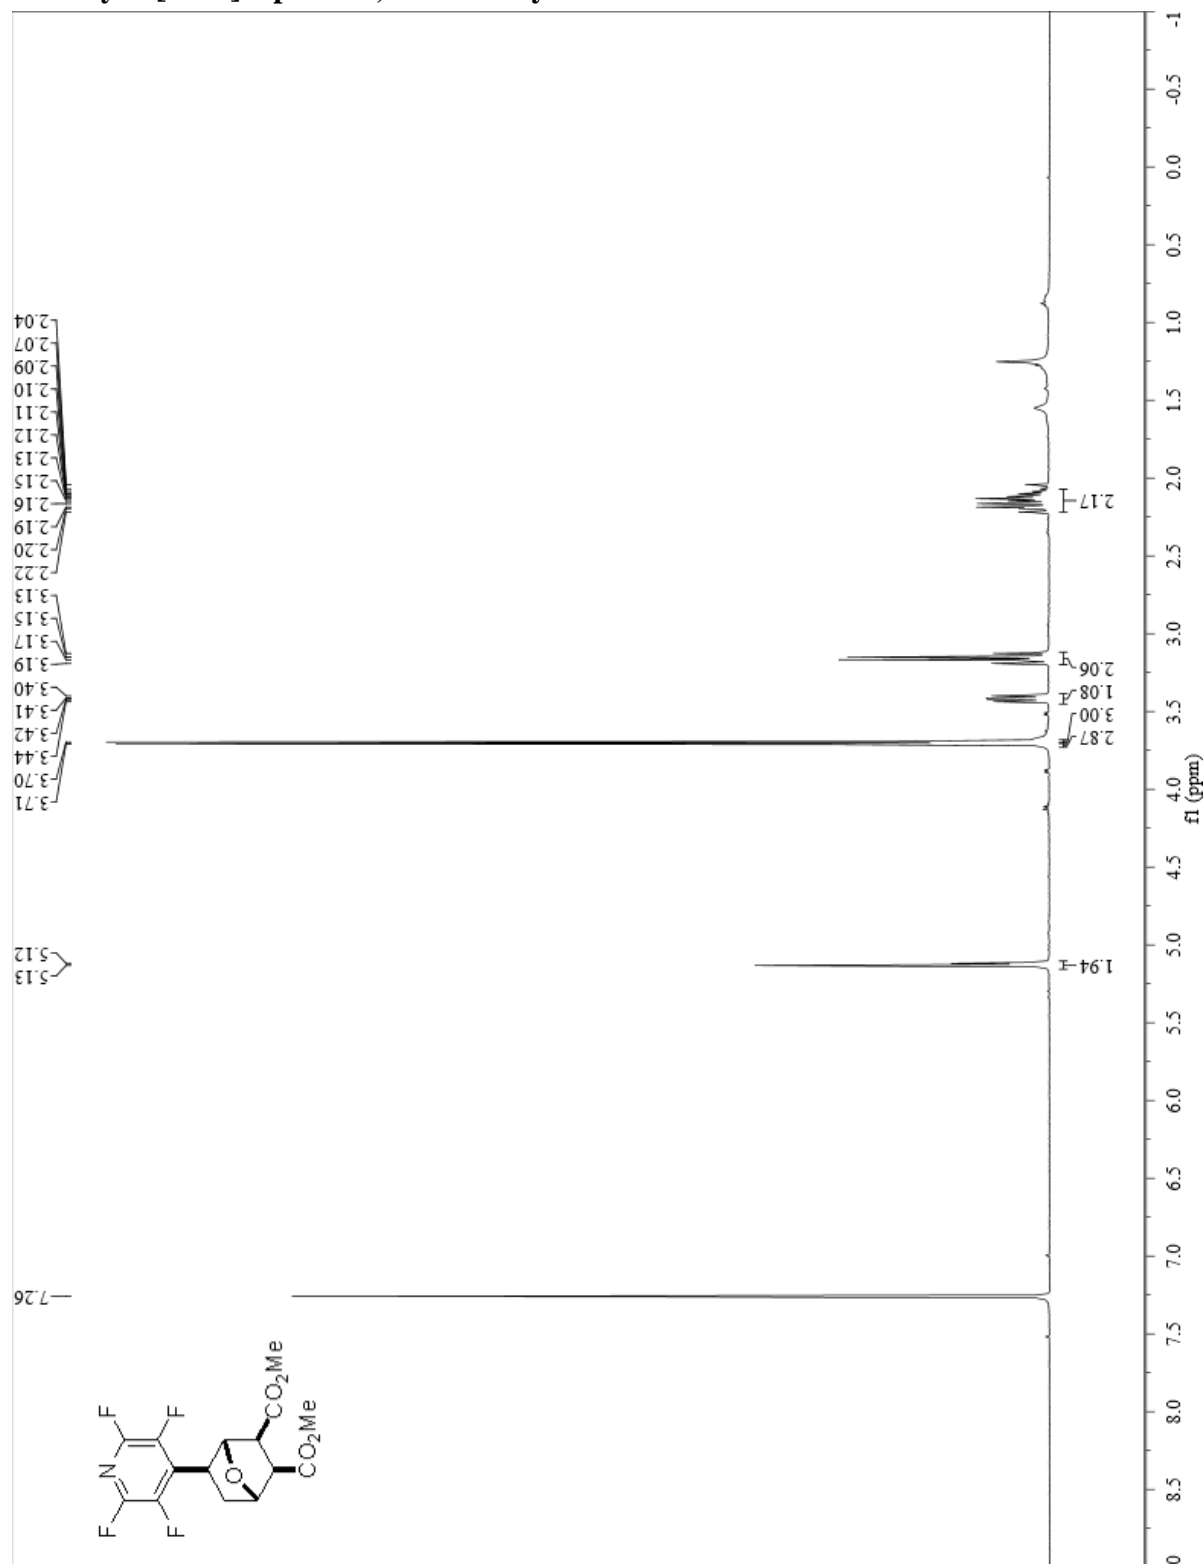

**$^{13}\text{C}\{^1\text{H}\}$  NMR (101 MHz, Chloroform-*d*, @ rt) of S-16a dimethyl 5-(perfluoropyridin-4-yl)-7-oxabicyclo[2.2.1]heptane-2,3-dicarboxylate**

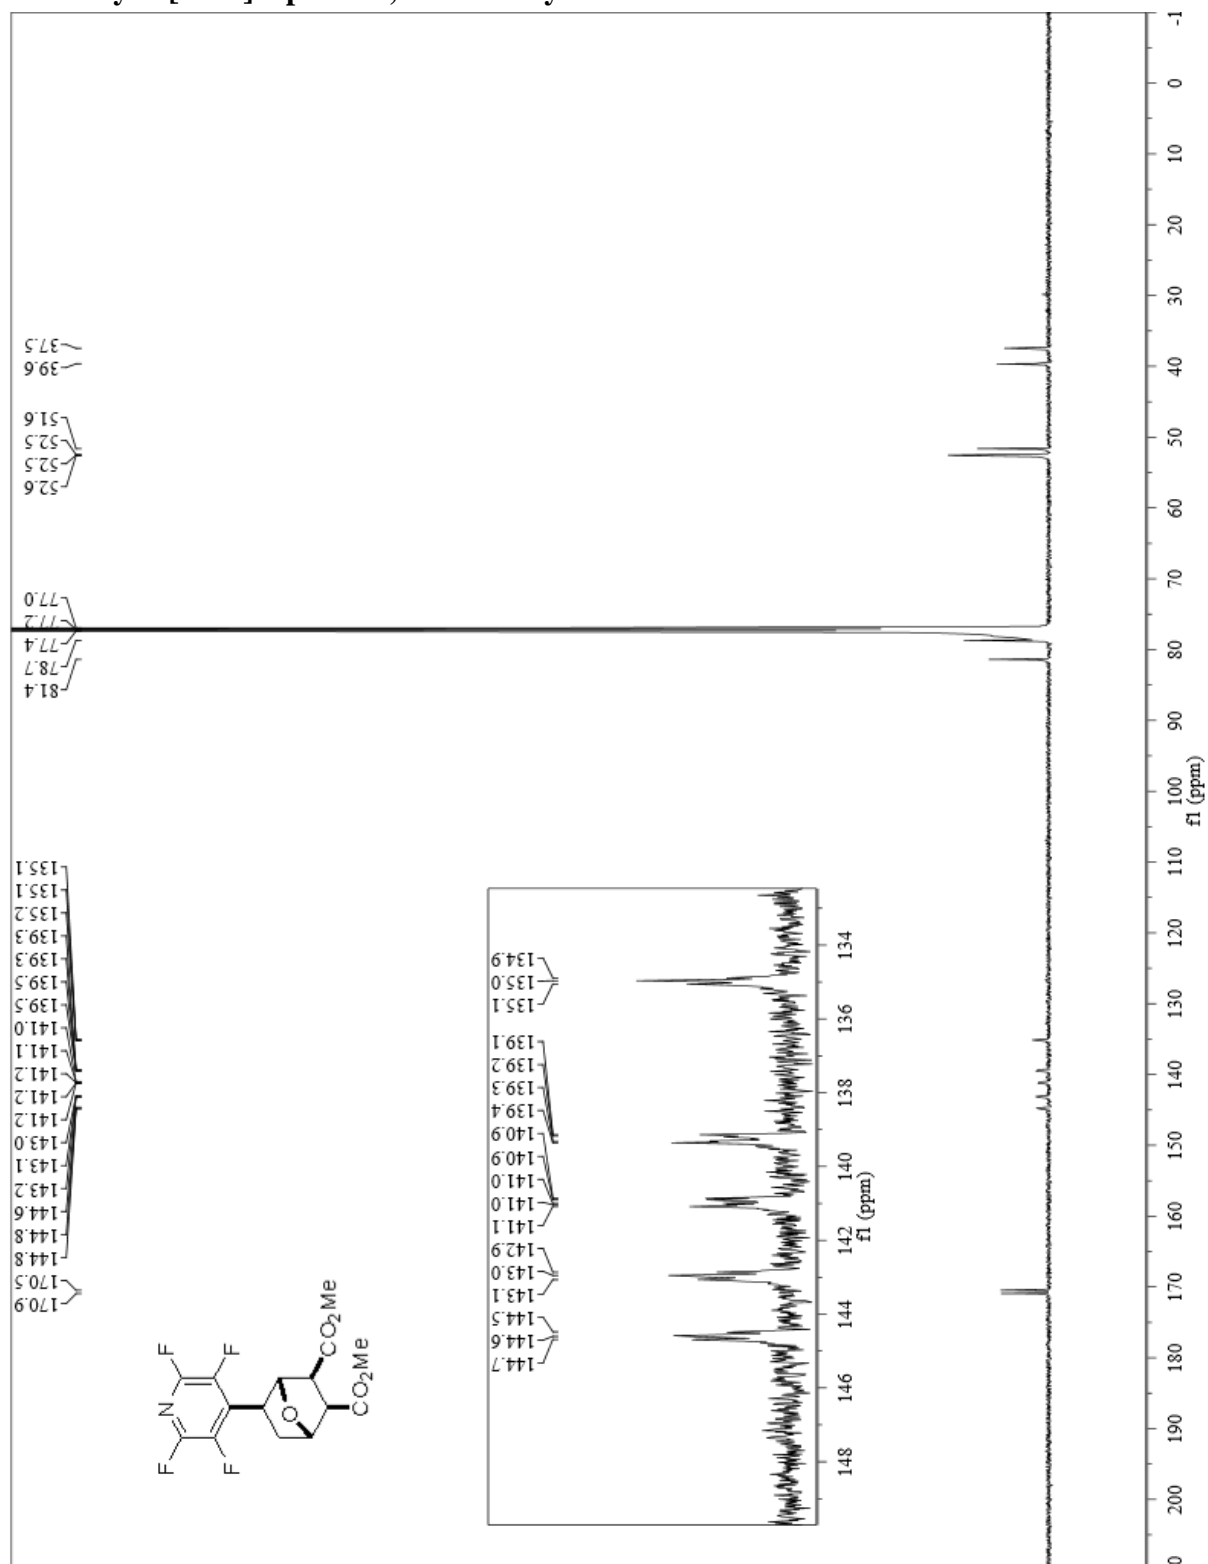

# GC and MS of S-16a dimethyl 5-(perfluoropyridin-4-yl)-7-oxabicyclo[2.2.1]heptane-2,3-dicarboxylate

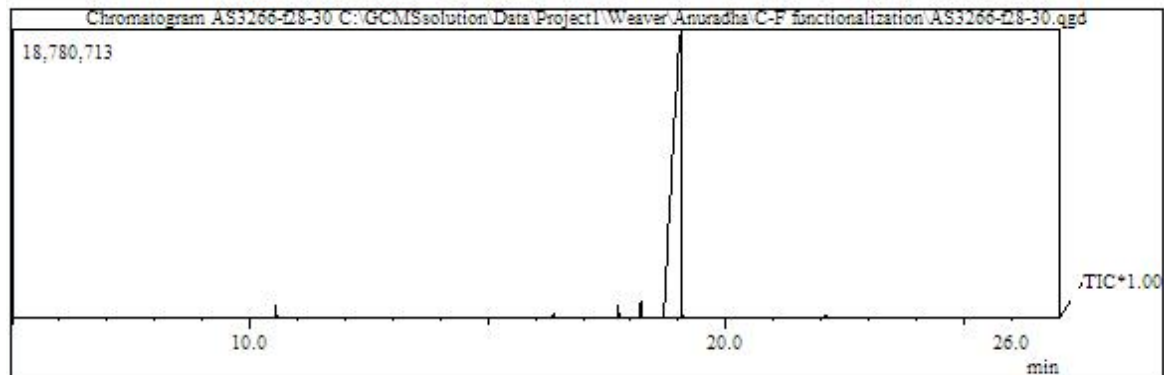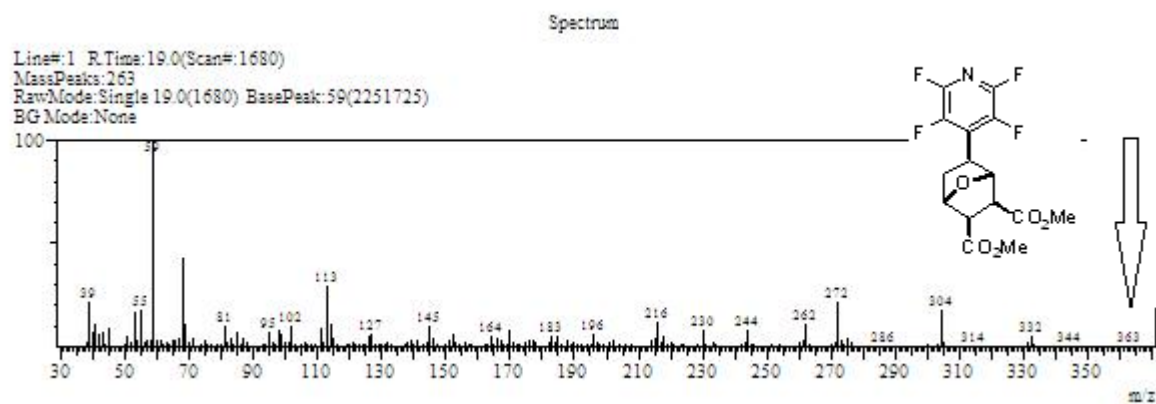

**<sup>19</sup>F NMR (376 MHz, Chloroform-*d*, @ rt) of S-17a 4-cyclohexyl-2,2',3,3',5,5',6,6'-octafluoro-1,1'-biphenyl**

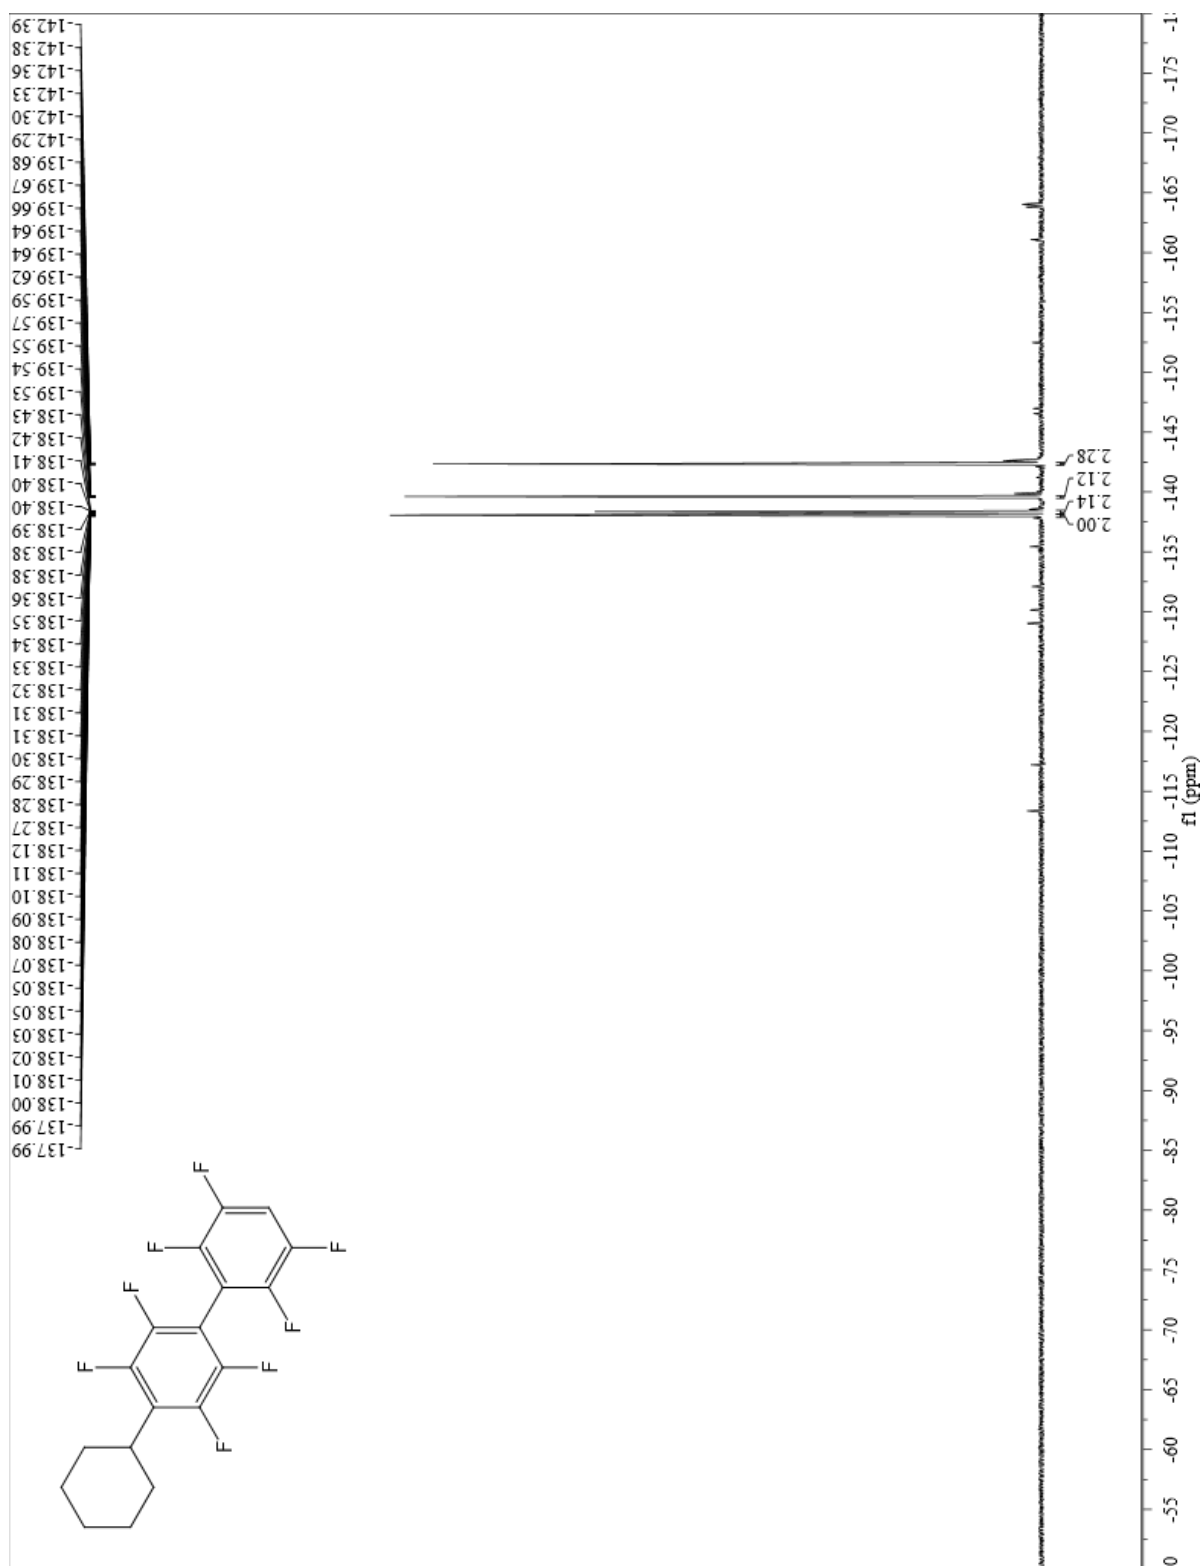



**<sup>1</sup>H NMR (400 MHz, Chloroform-*d*, @ rt) of S-17a 4-cyclohexyl-2,2',3,3',5,5',6,6'-octafluoro-1,1'-biphenyl**

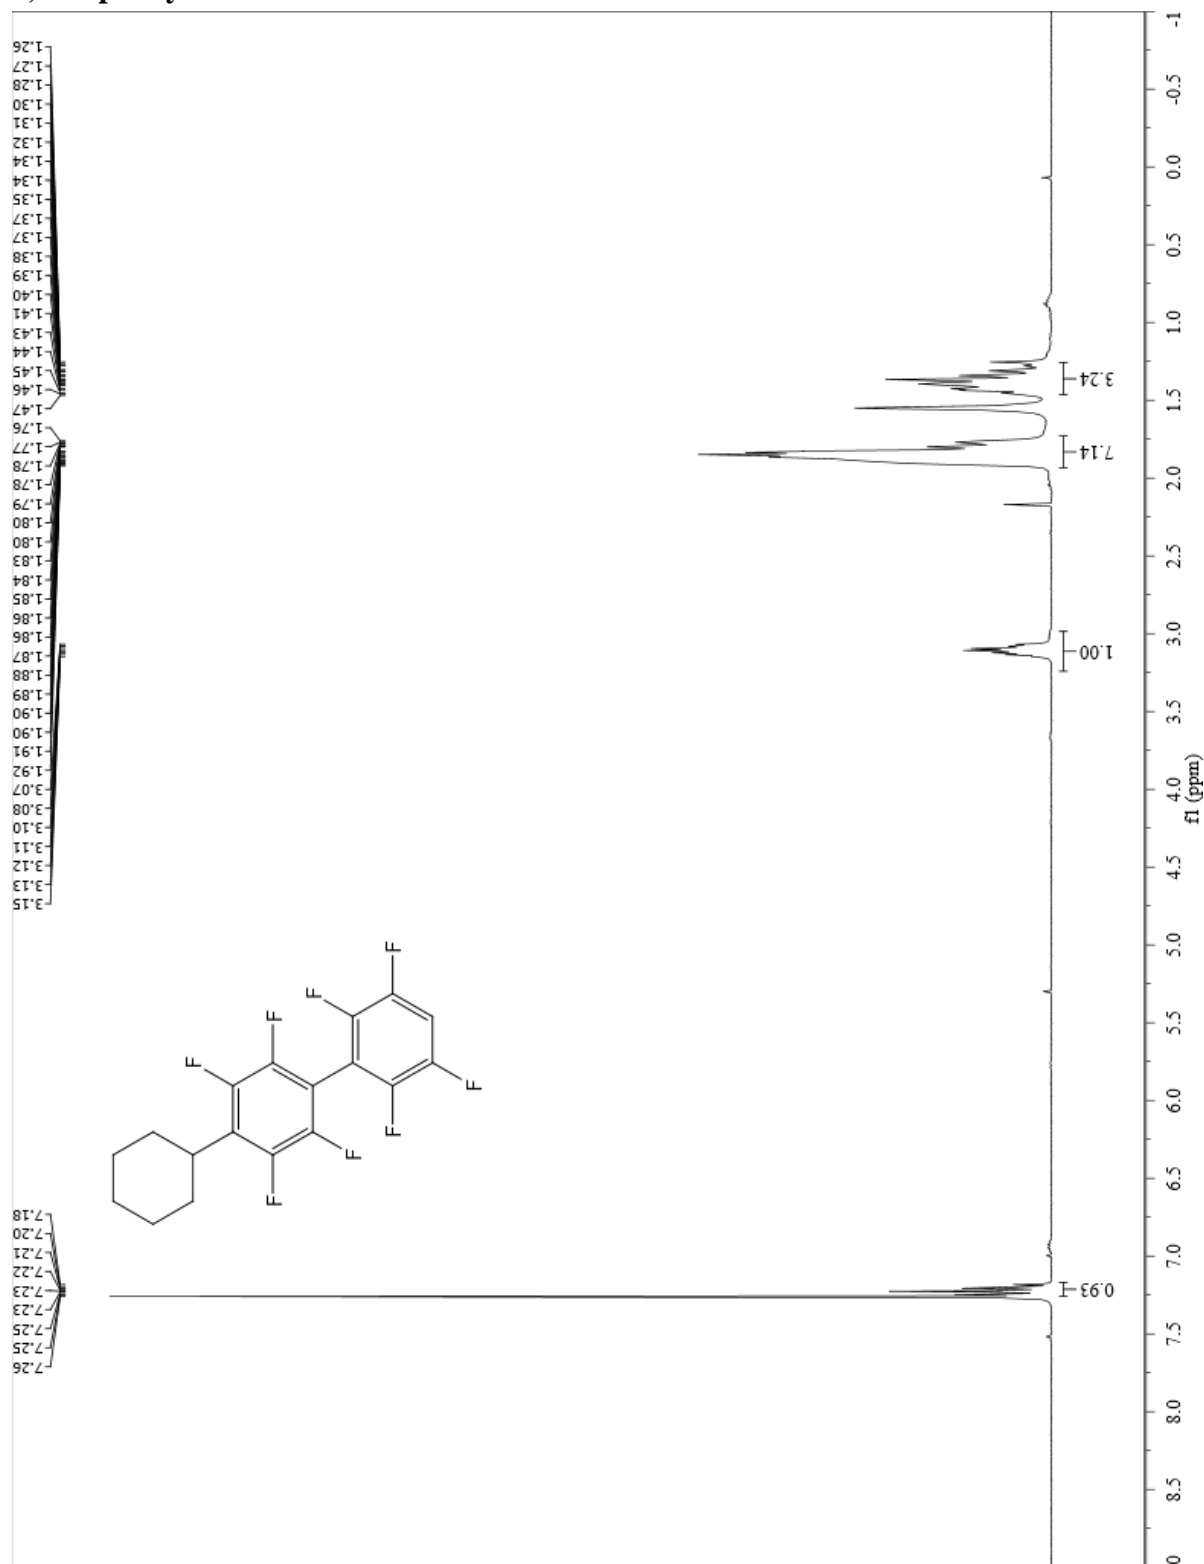

**$^{13}\text{C}\{^1\text{H}\}$  NMR (101 MHz, Chloroform-*d*, @ rt) of S-17a 4-cyclohexyl-2,2',3,3',5,5',6,6'-octafluoro-1,1'-biphenyl**

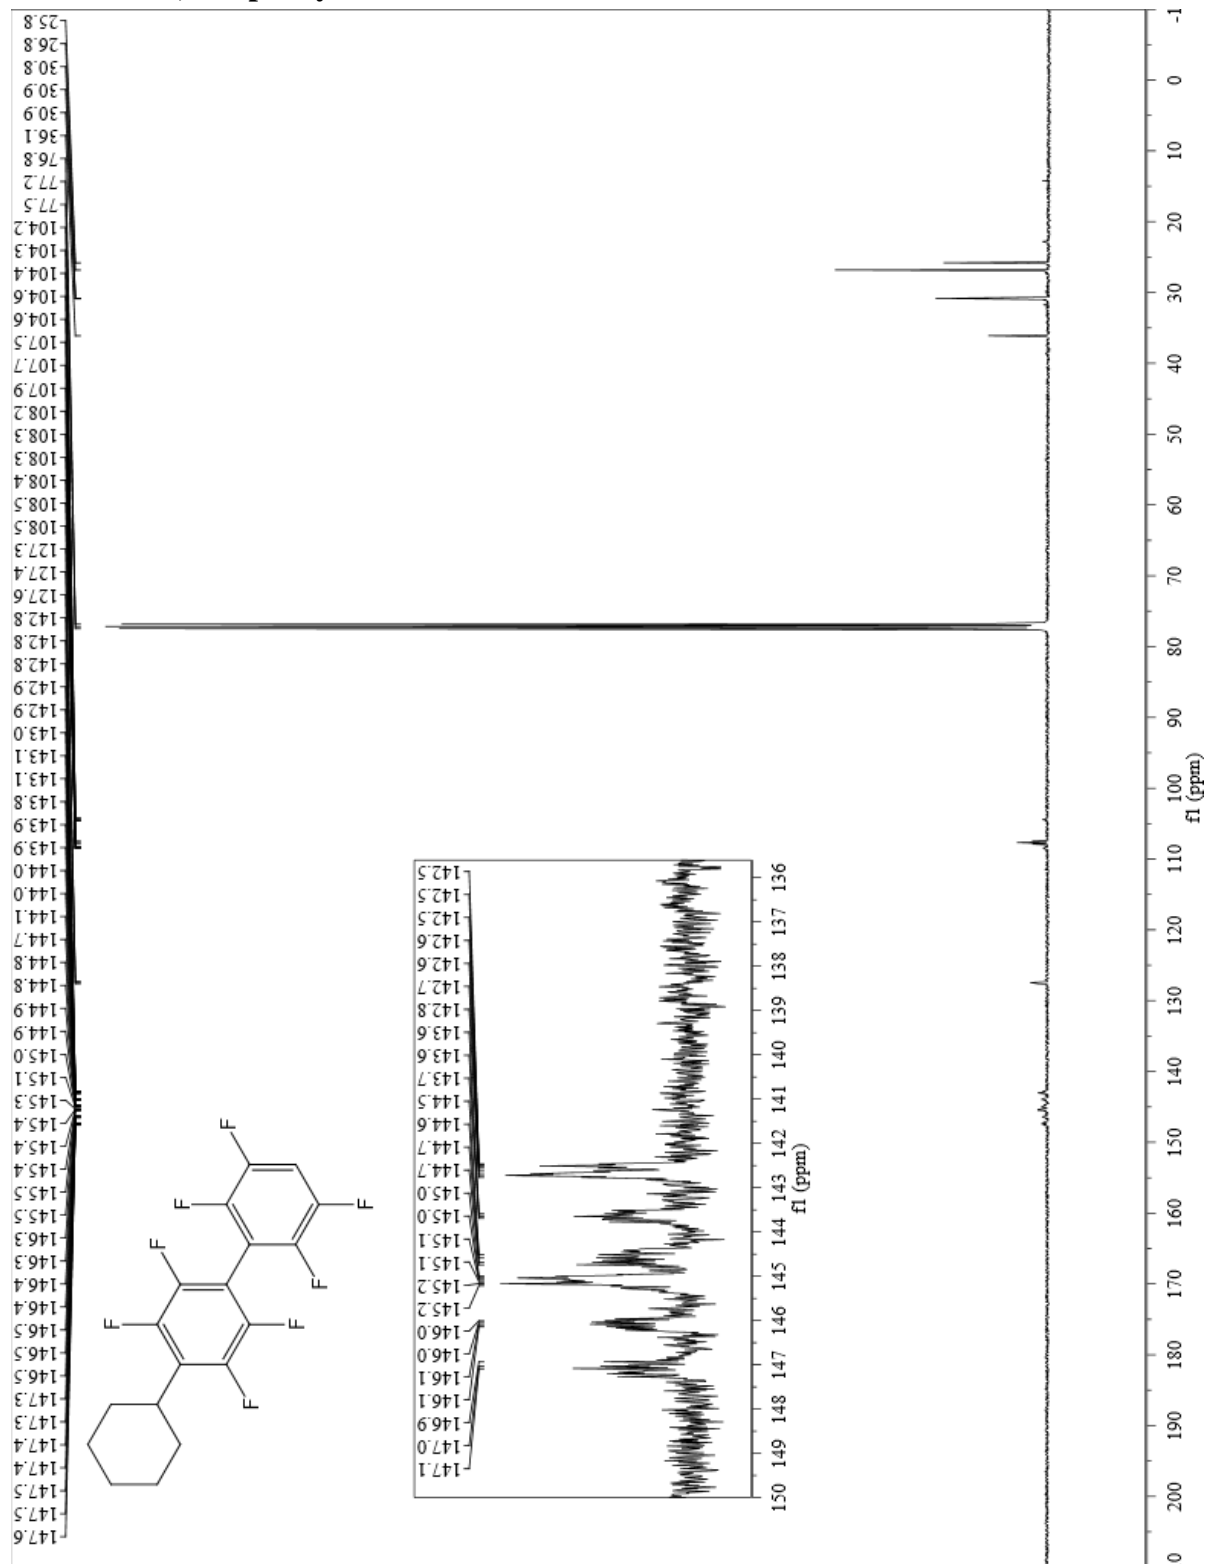

# GC and MS of S-17a 4-cyclohexyl-2,2',3,3',5,5',6,6'-octafluoro-1,1'-biphenyl

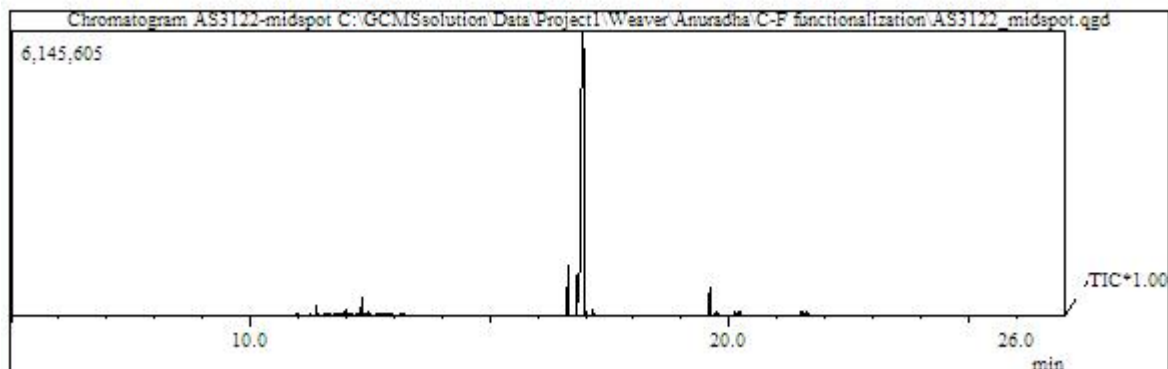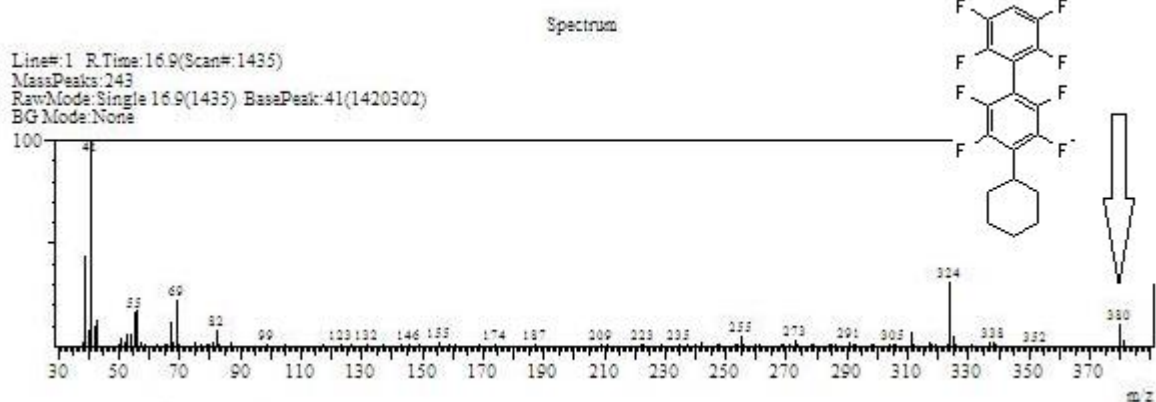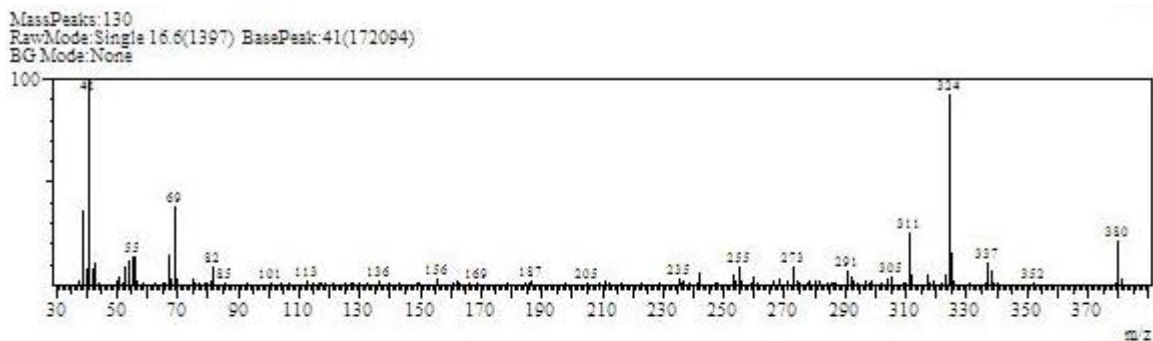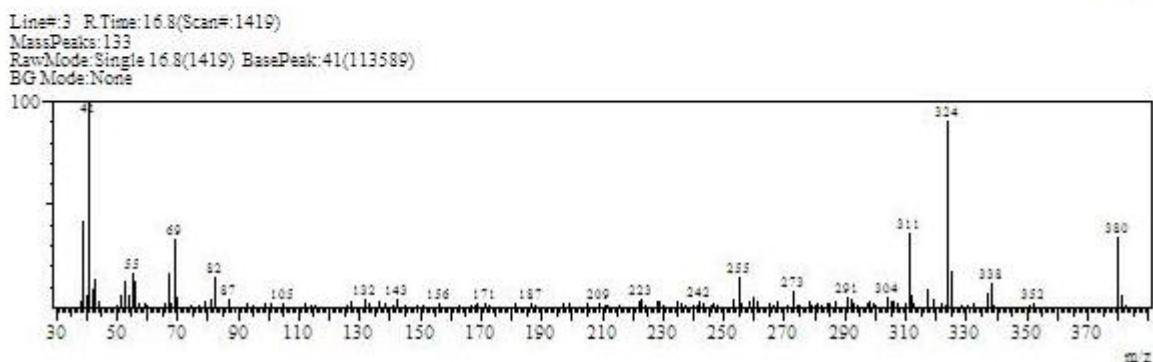

**<sup>19</sup>F NMR (376 MHz, Chloroform-*d*, @ rt) of S-18a ethyl 3-(2,3,5,6-tetrafluoro-4-(trifluoromethyl)phenyl)butanoate**

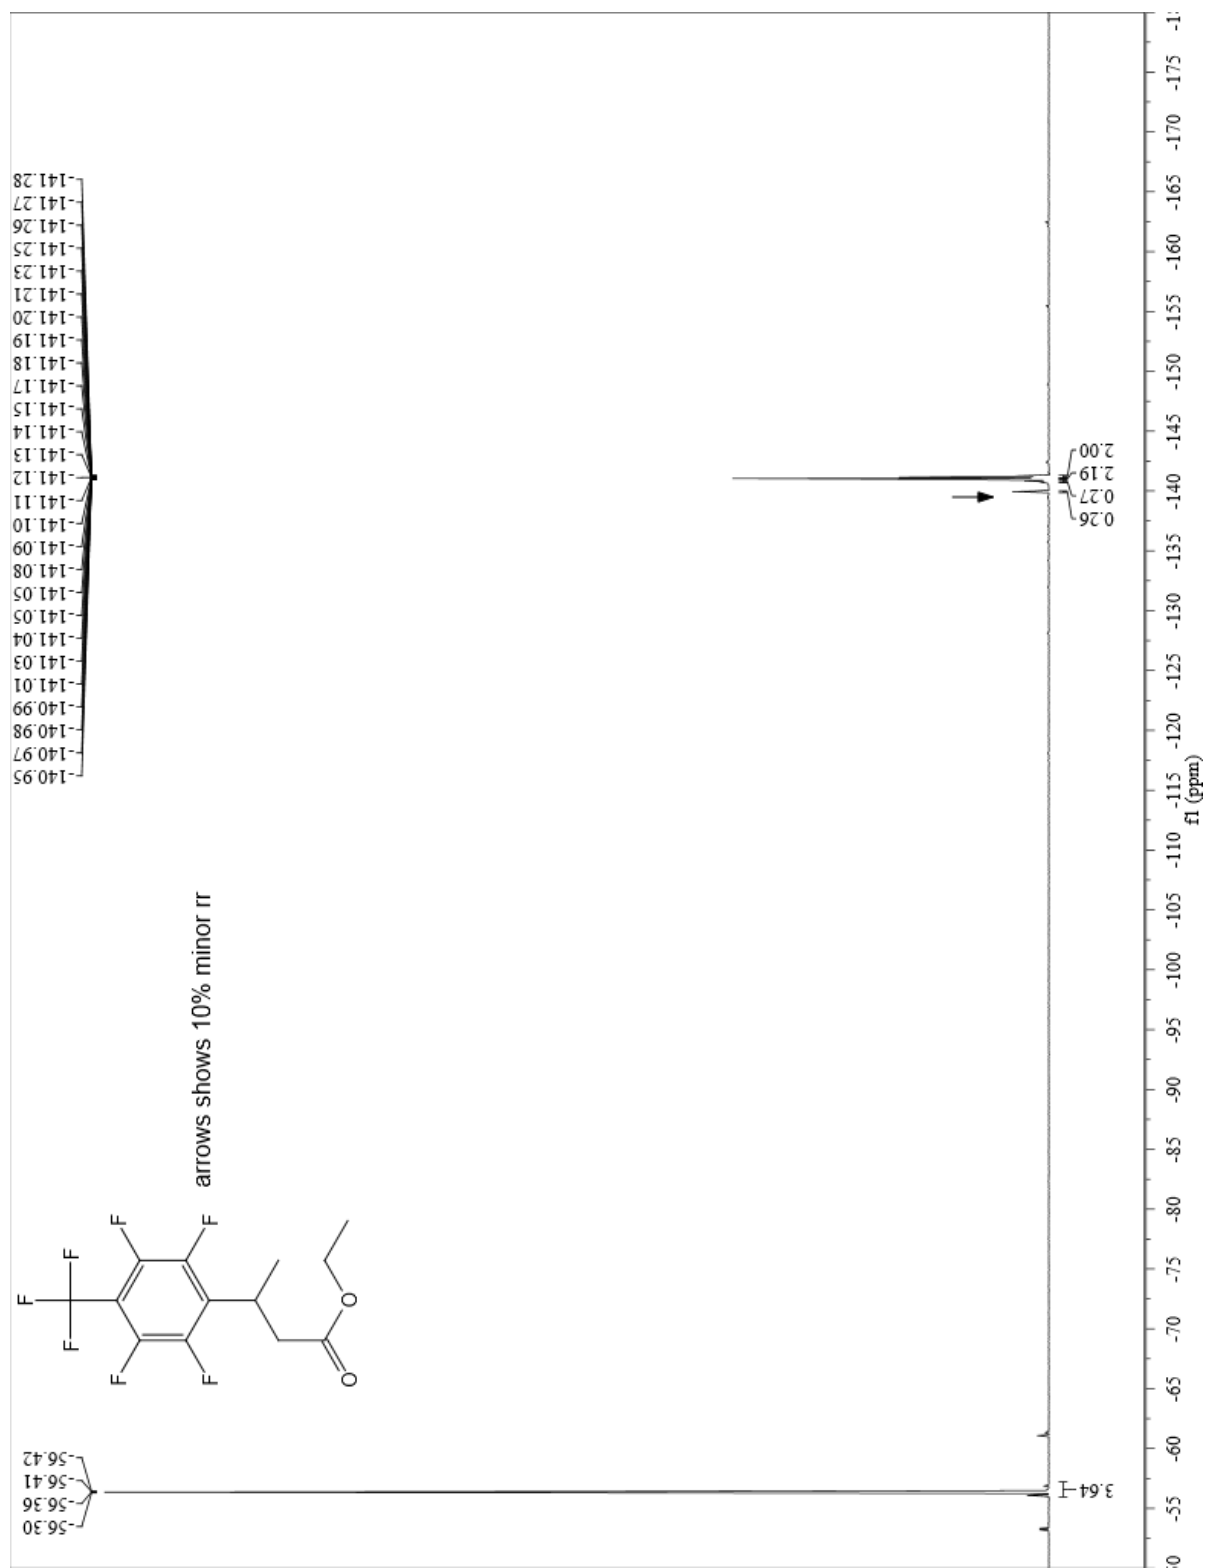

**<sup>1</sup>H NMR (400 MHz, Chloroform-*d*, @ rt) of S-18a ethyl 3-(2,3,5,6-tetrafluoro-4-(trifluoromethyl)phenyl)butanoate**

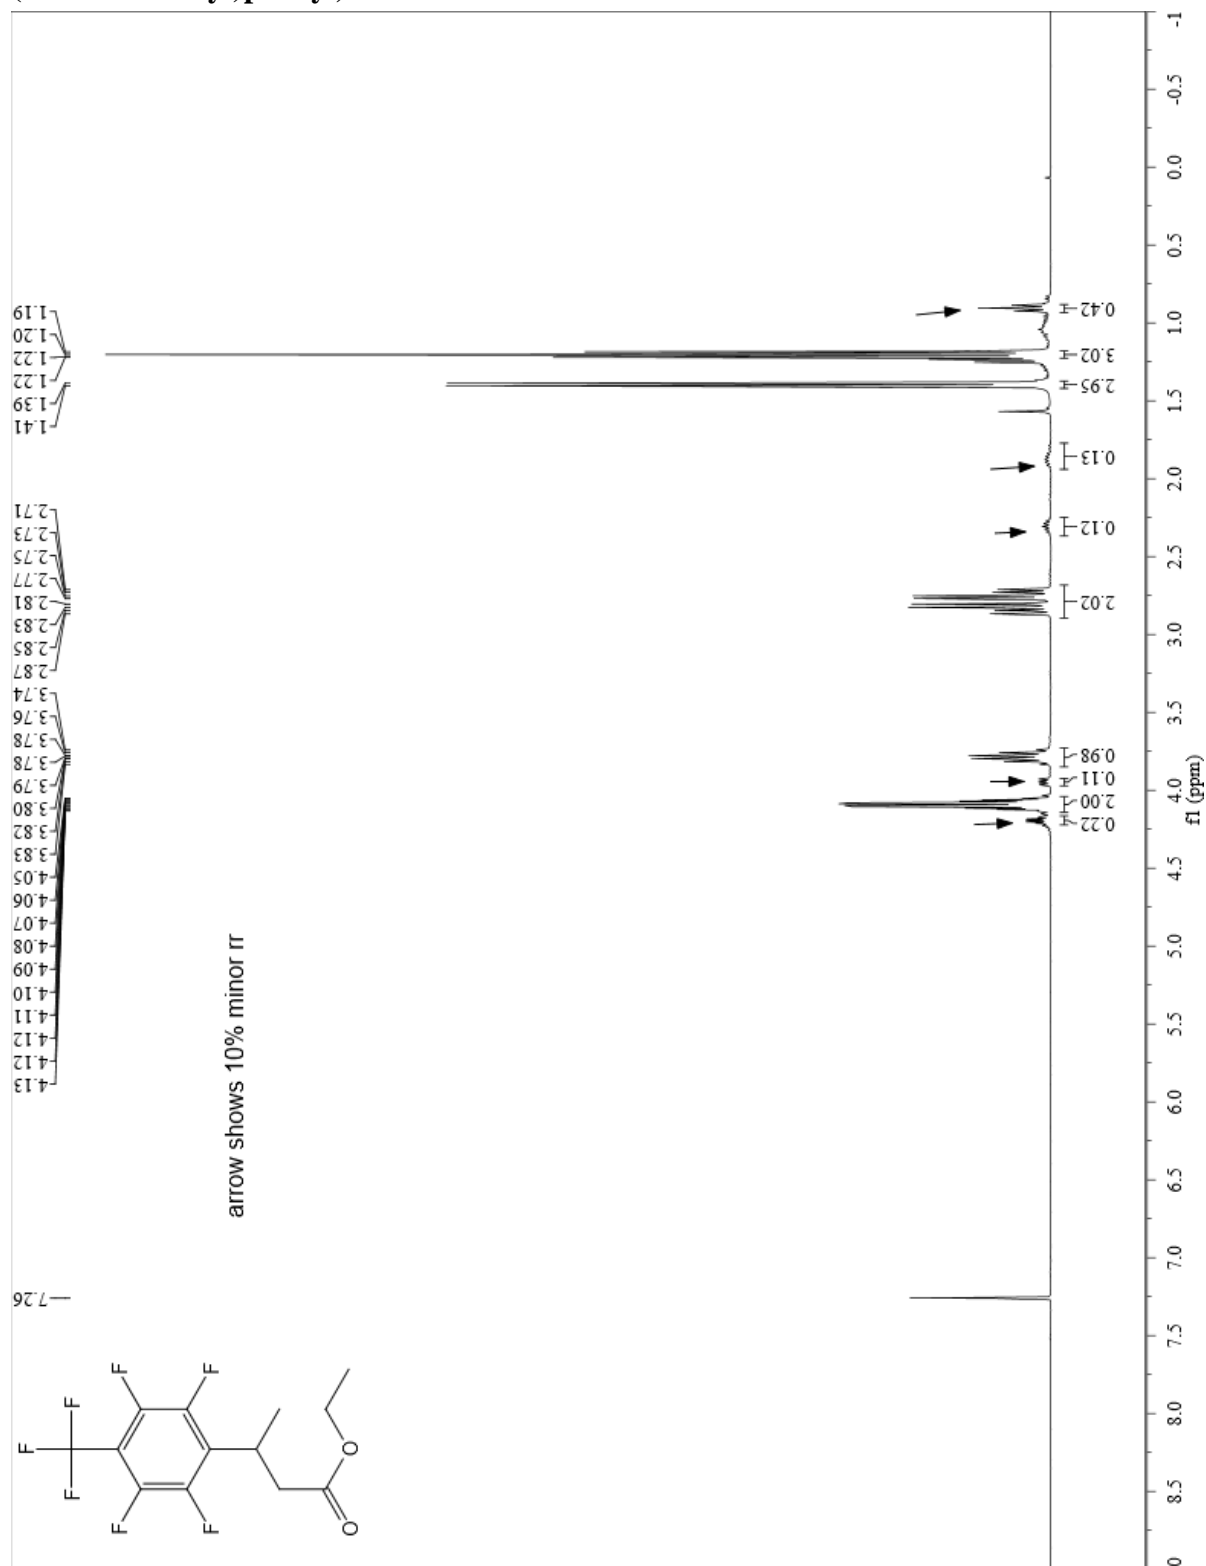

<sup>13</sup>C{<sup>1</sup>H} NMR (101 MHz, Chloroform-*d*, @ rt) of S-18a ethyl 3-(2,3,5,6-tetrafluoro-4-(trifluoromethyl)phenyl)butanoate

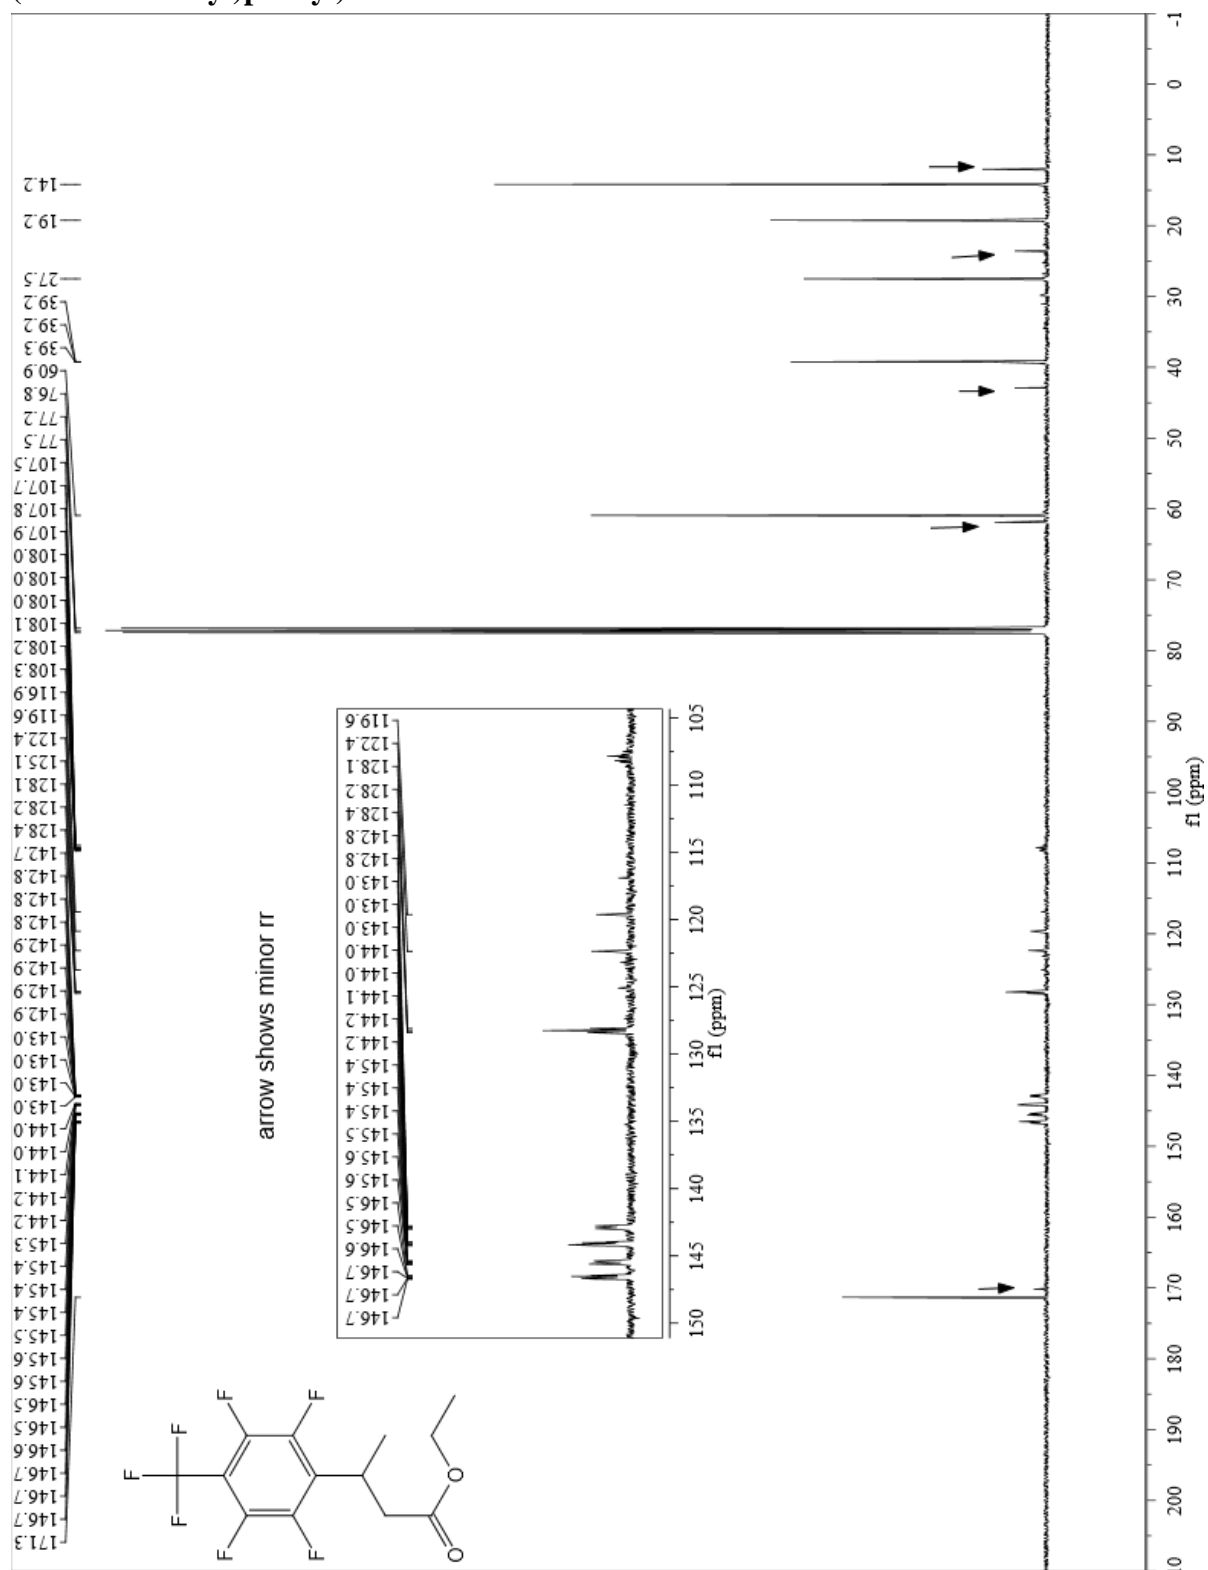

# GC and MS of S-18a ethyl 3-(2,3,5,6-tetrafluoro-4-(trifluoromethyl)phenyl)butanoate

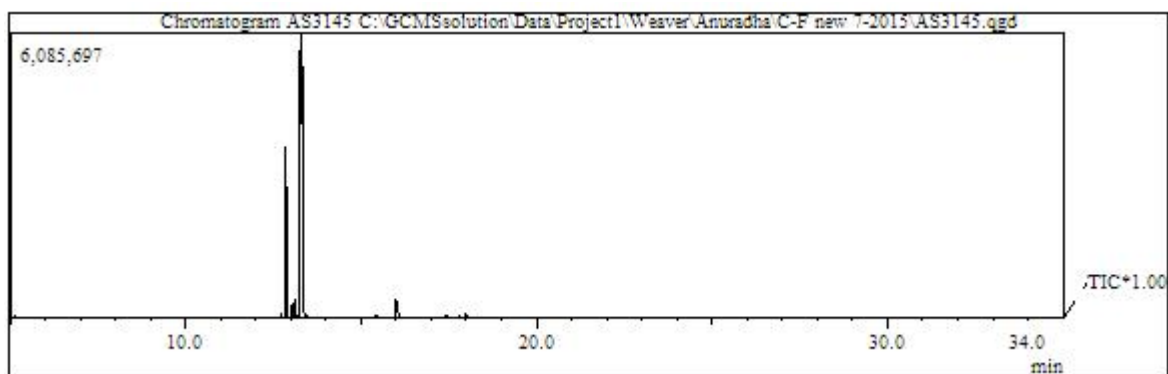

Spectrum

Line# 1 R Time: 13.3 (Scan#: 993)  
 MassPeaks: 226  
 RawMode: Single 13.3 (993) BasePeak: 60 (494807)  
 BG Mode: None

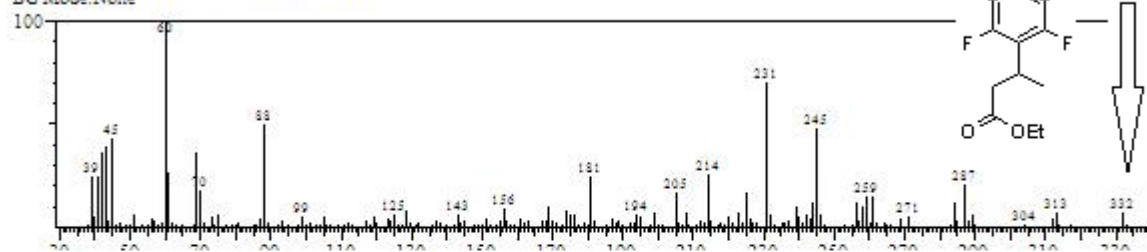

Line# 3 R Time: 12.9 (Scan#: 945)  
 MassPeaks: 197  
 RawMode: Single 12.9 (945) BasePeak: 231 (928372)  
 BG Mode: None

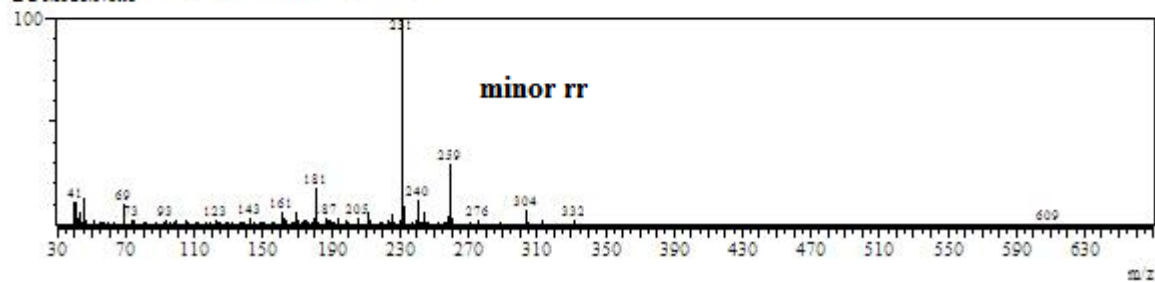

**<sup>19</sup>F NMR (376 MHz, Chloroform-*d*, @ rt) of S-19a methyl 3-(4-cyano-2,3,5,6-tetrafluorophenyl)butanoate**

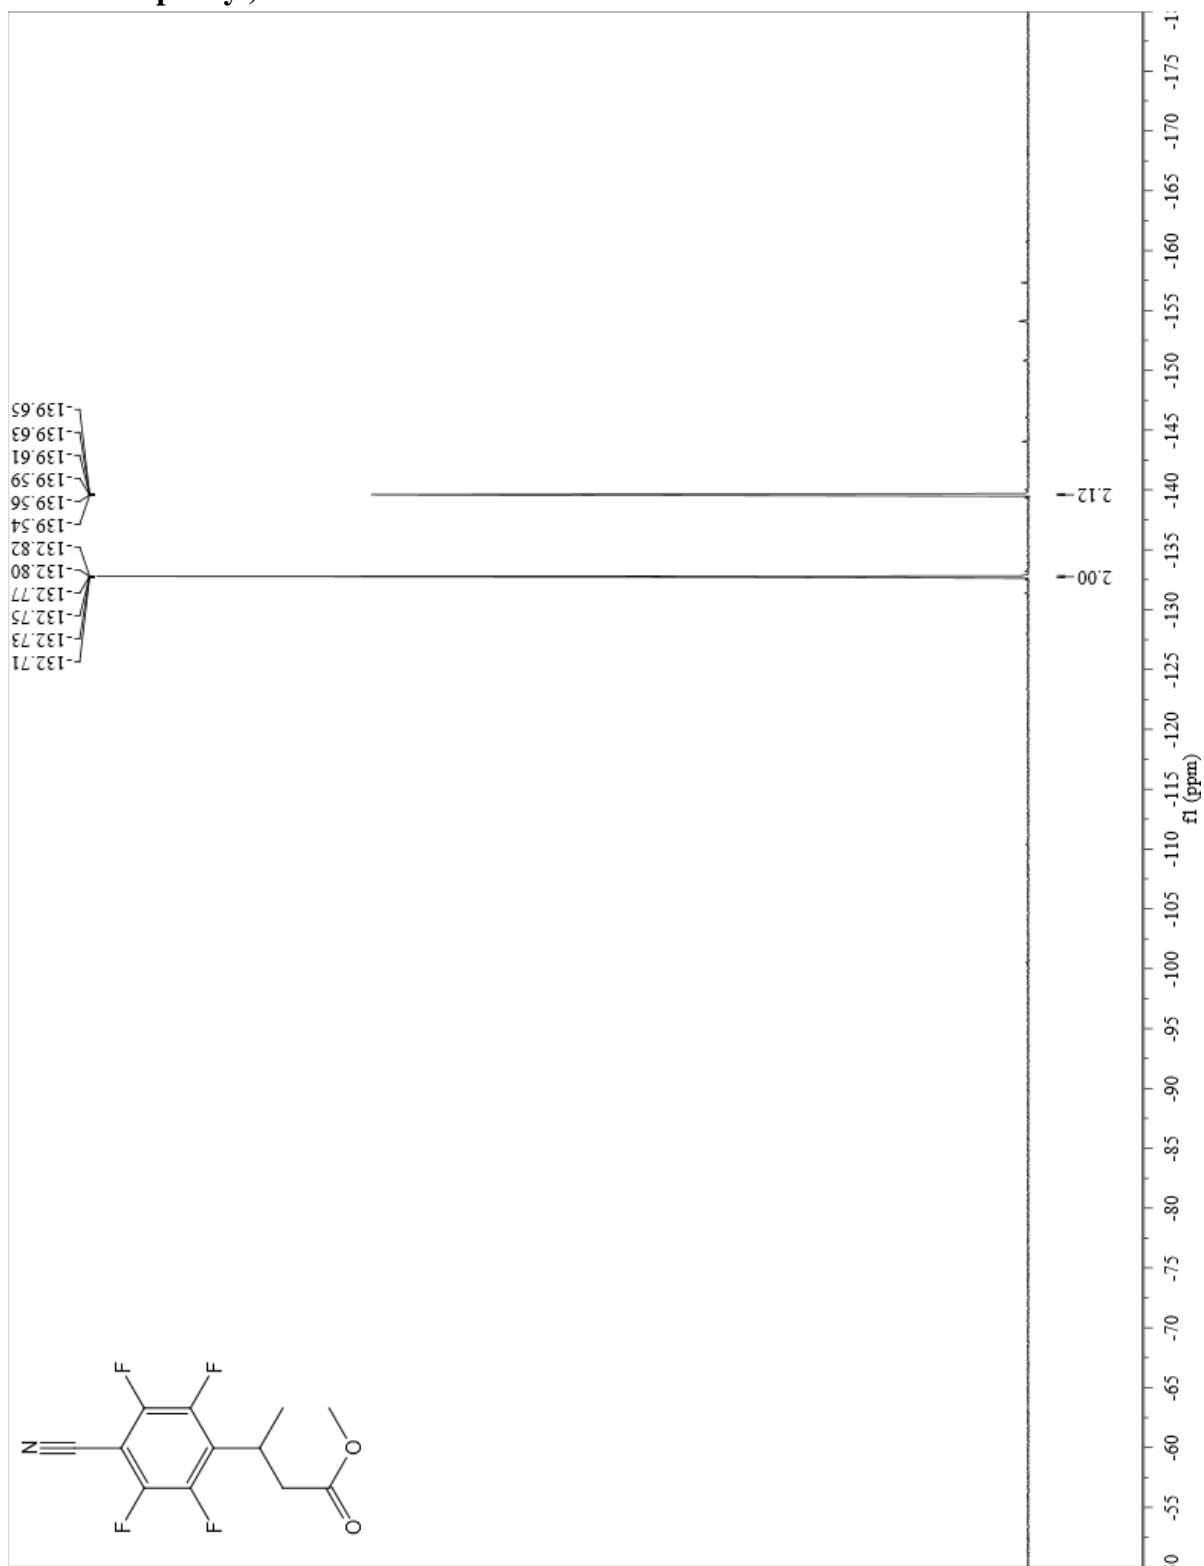



**<sup>1</sup>H NMR (400 MHz, Chloroform-*d*, @ rt) of S-19a methyl 3-(4-cyano-2,3,5,6-tetrafluorophenyl)butanoate**

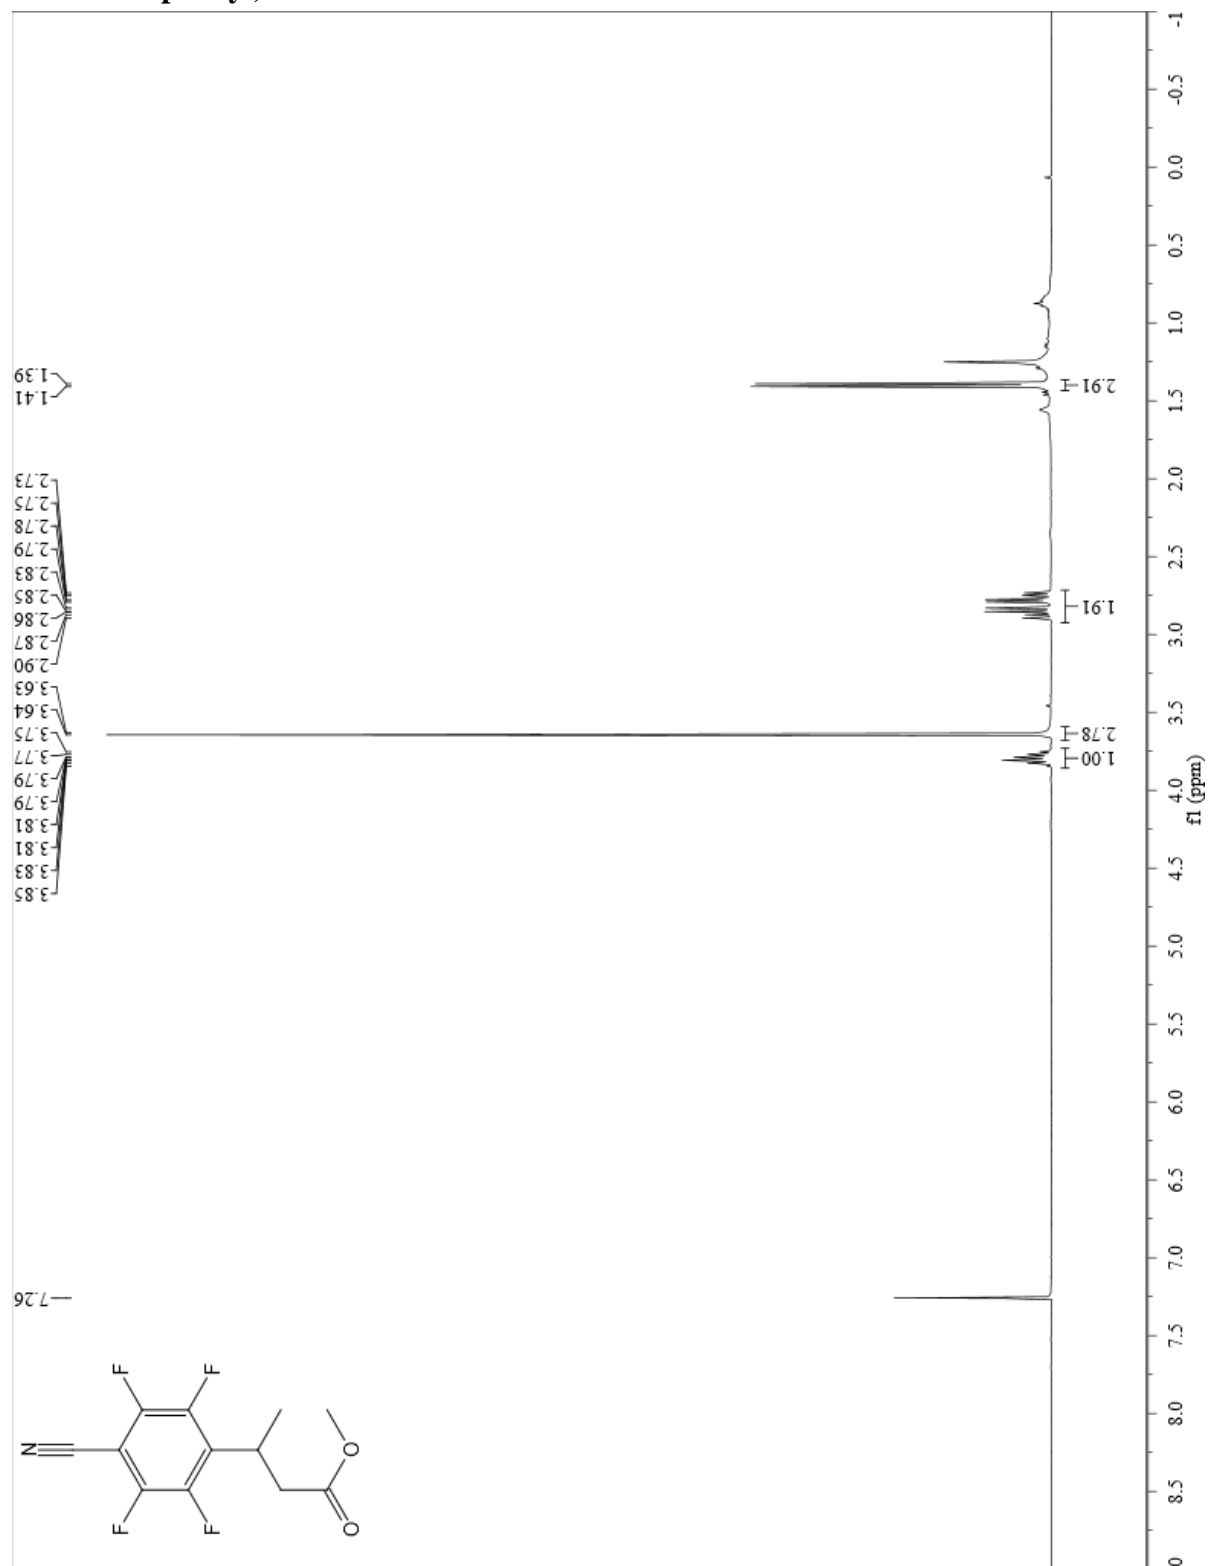

**$^{13}\text{C}\{\text{H}\}$  NMR (101 MHz, Chloroform-*d*, @ rt) of S-19a methyl 3-(4-cyano-2,3,5,6-tetrafluorophenyl)butanoate**

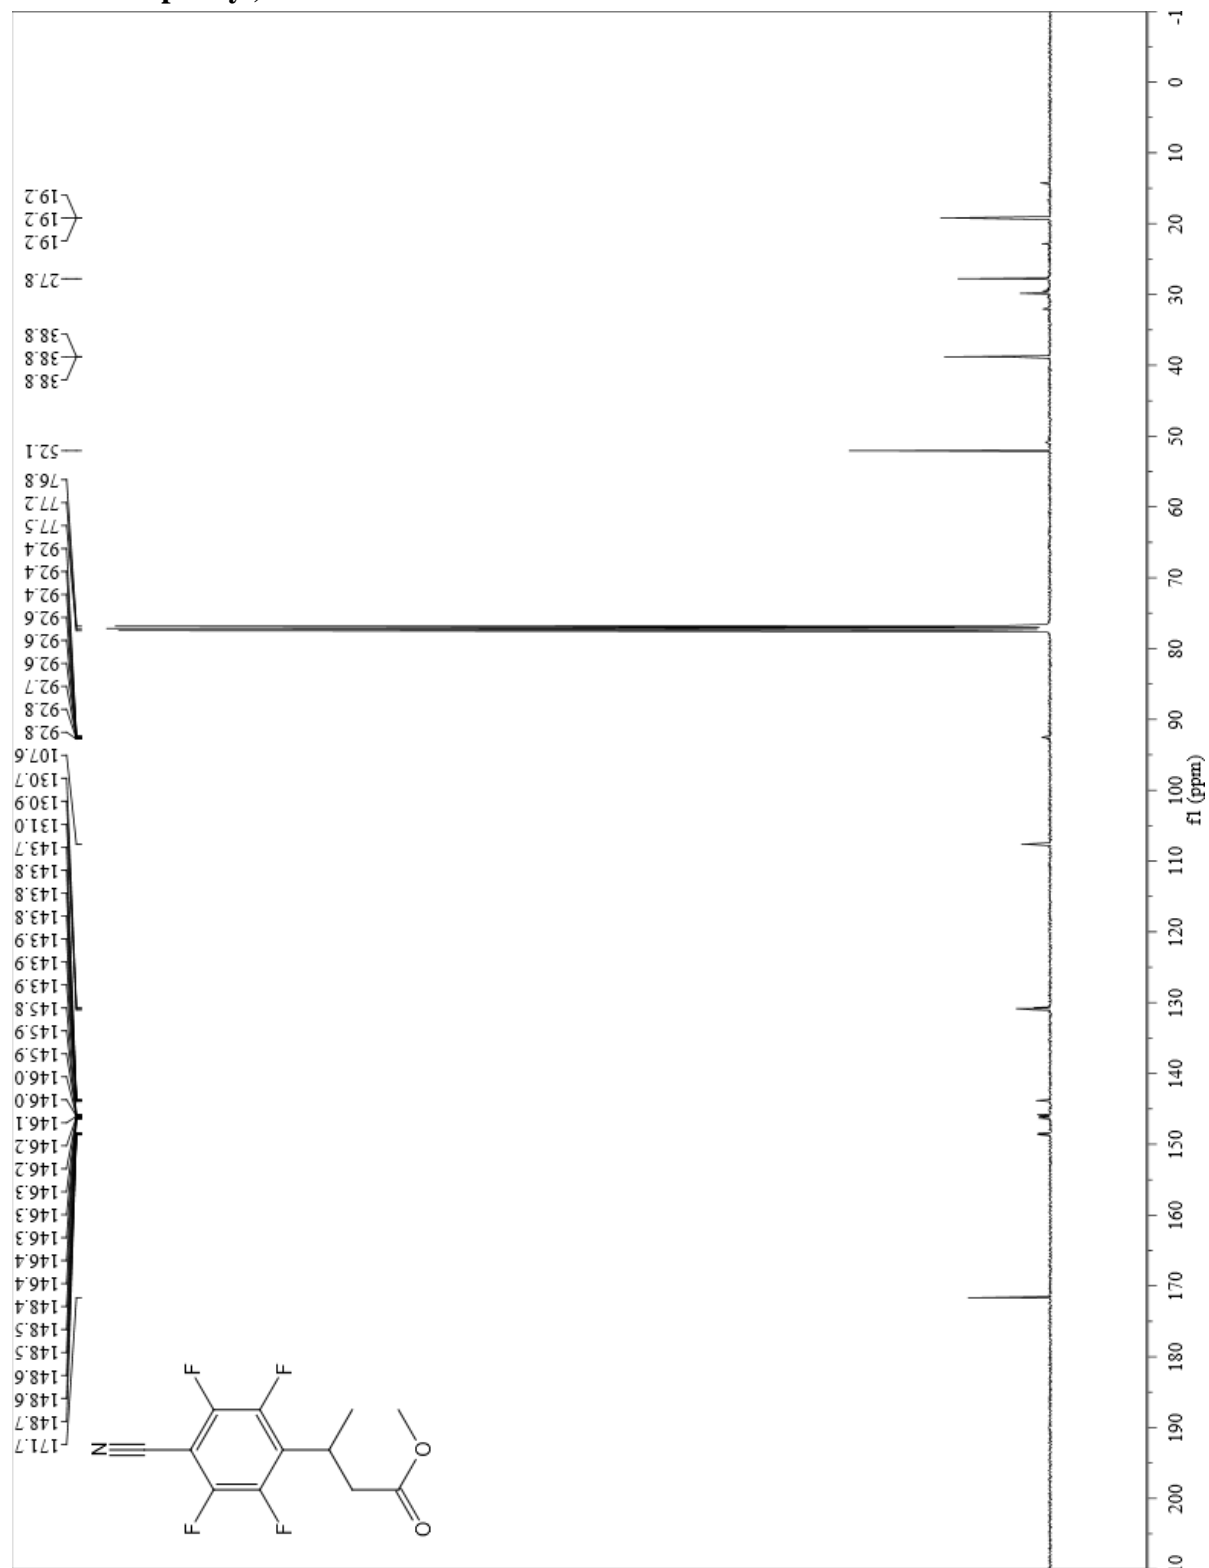

# GC and MS of S-19a methyl 3-(4-cyano-2,3,5,6-tetrafluorophenyl)butanoate

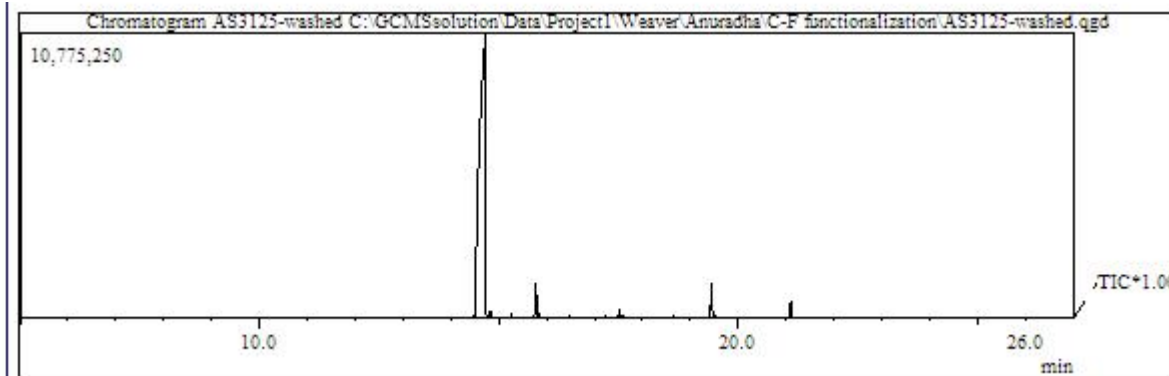

Spectrum

Line#1 RTime:14.7(Scan#:1169)

MassPeaks:51

RawMode:Single 14.7(1169) BasePeak:74(19518)

BG Mode:None

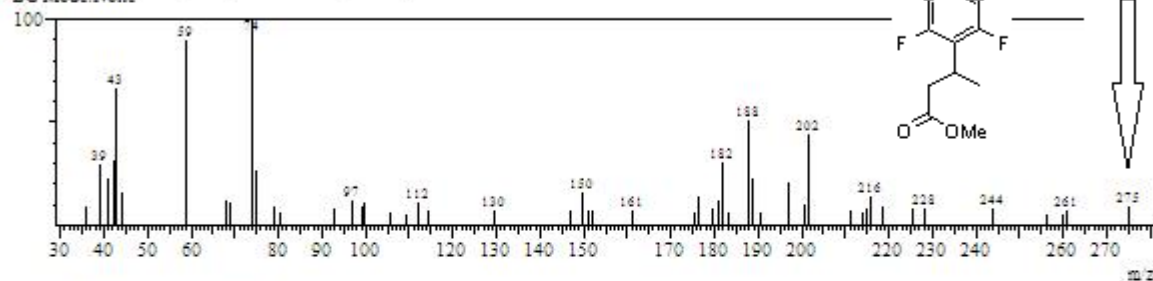

Line#2 RTime:15.8(Scan#:1294)

MassPeaks:146

RawMode:Single 15.8(1294) BasePeak:216(268015)

BG Mode:None

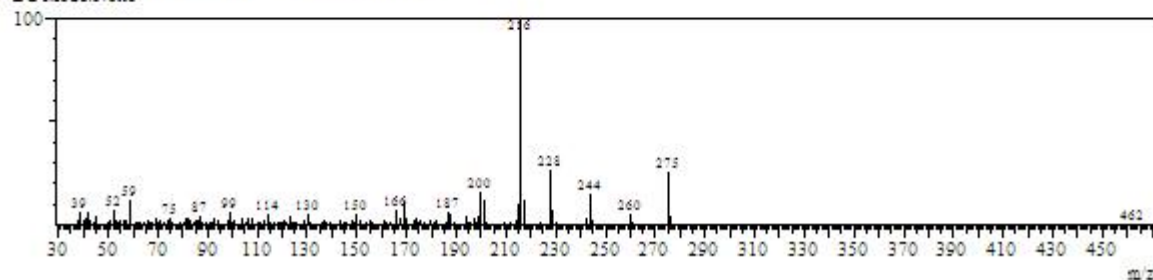

**<sup>19</sup>F NMR (376 MHz, Chloroform-*d*, @ rt) of S-20a ethyl 3-(4-acetyl-2,3,5,6-tetrafluorophenyl)butanoate**

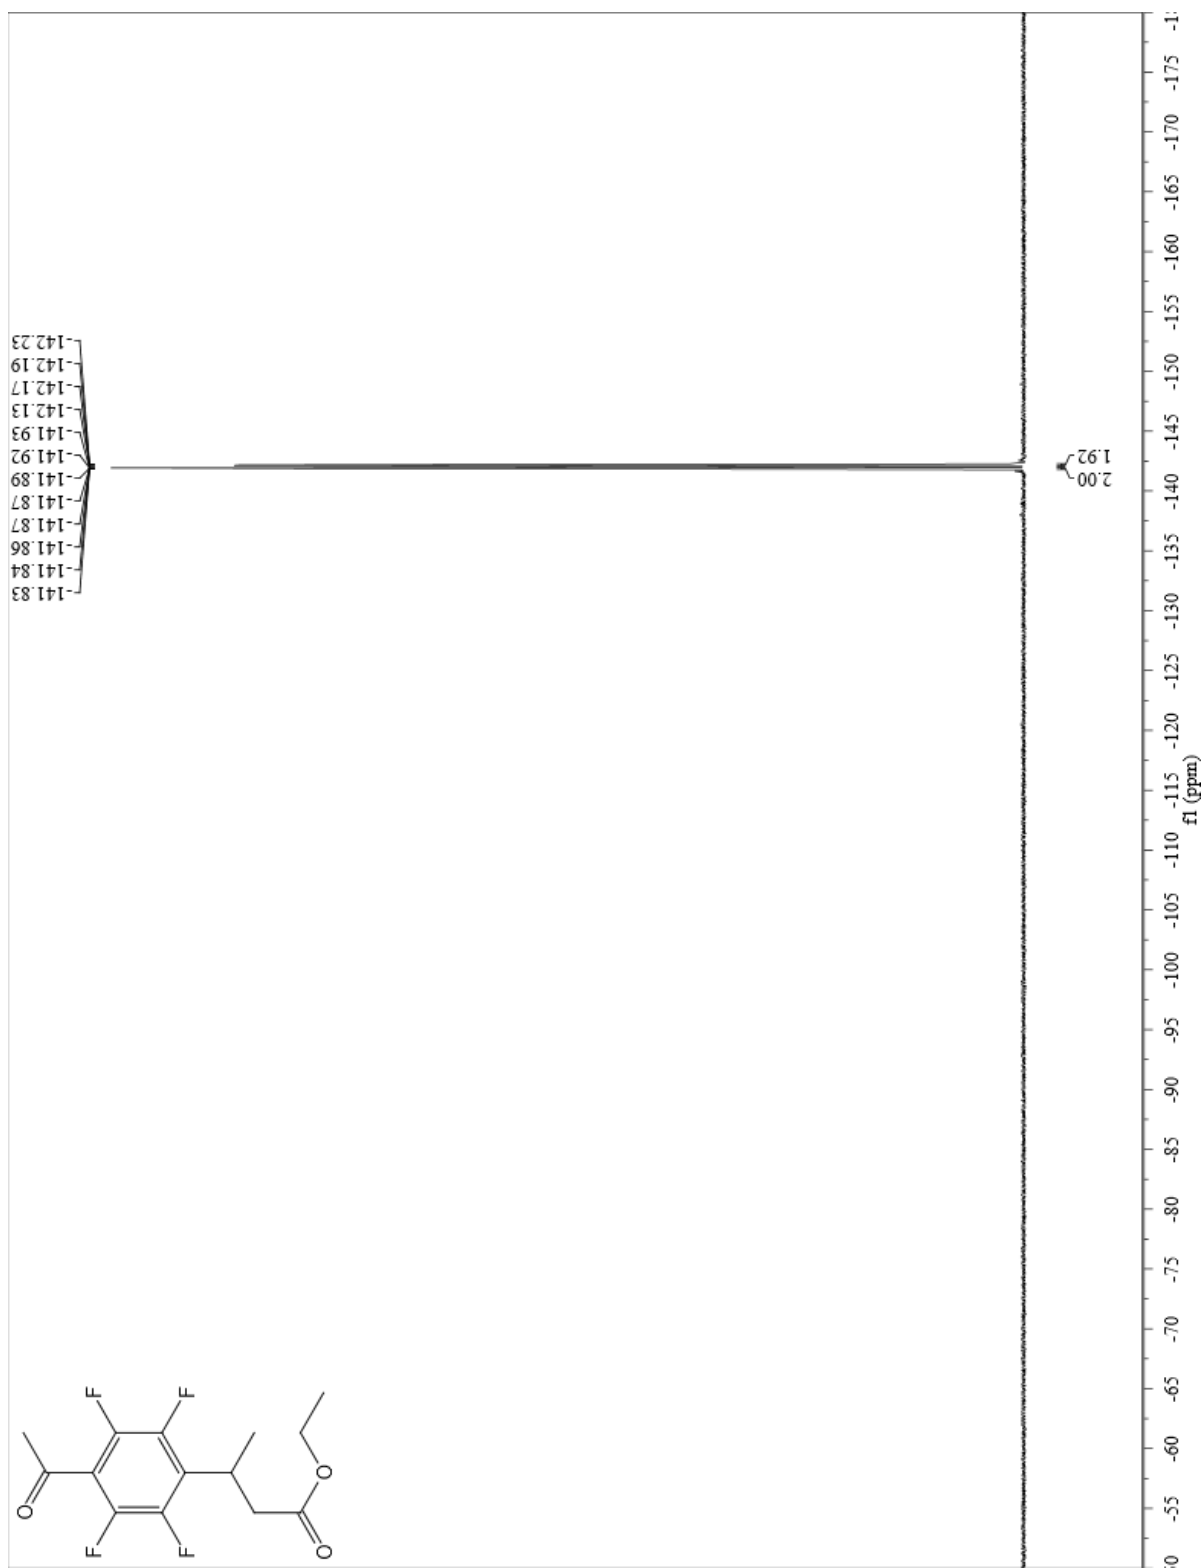

**<sup>1</sup>H NMR (400 MHz, Chloroform-*d*, @ rt) of S-20a ethyl 3-(4-acetyl-2,3,5,6-tetrafluorophenyl)butanoate**

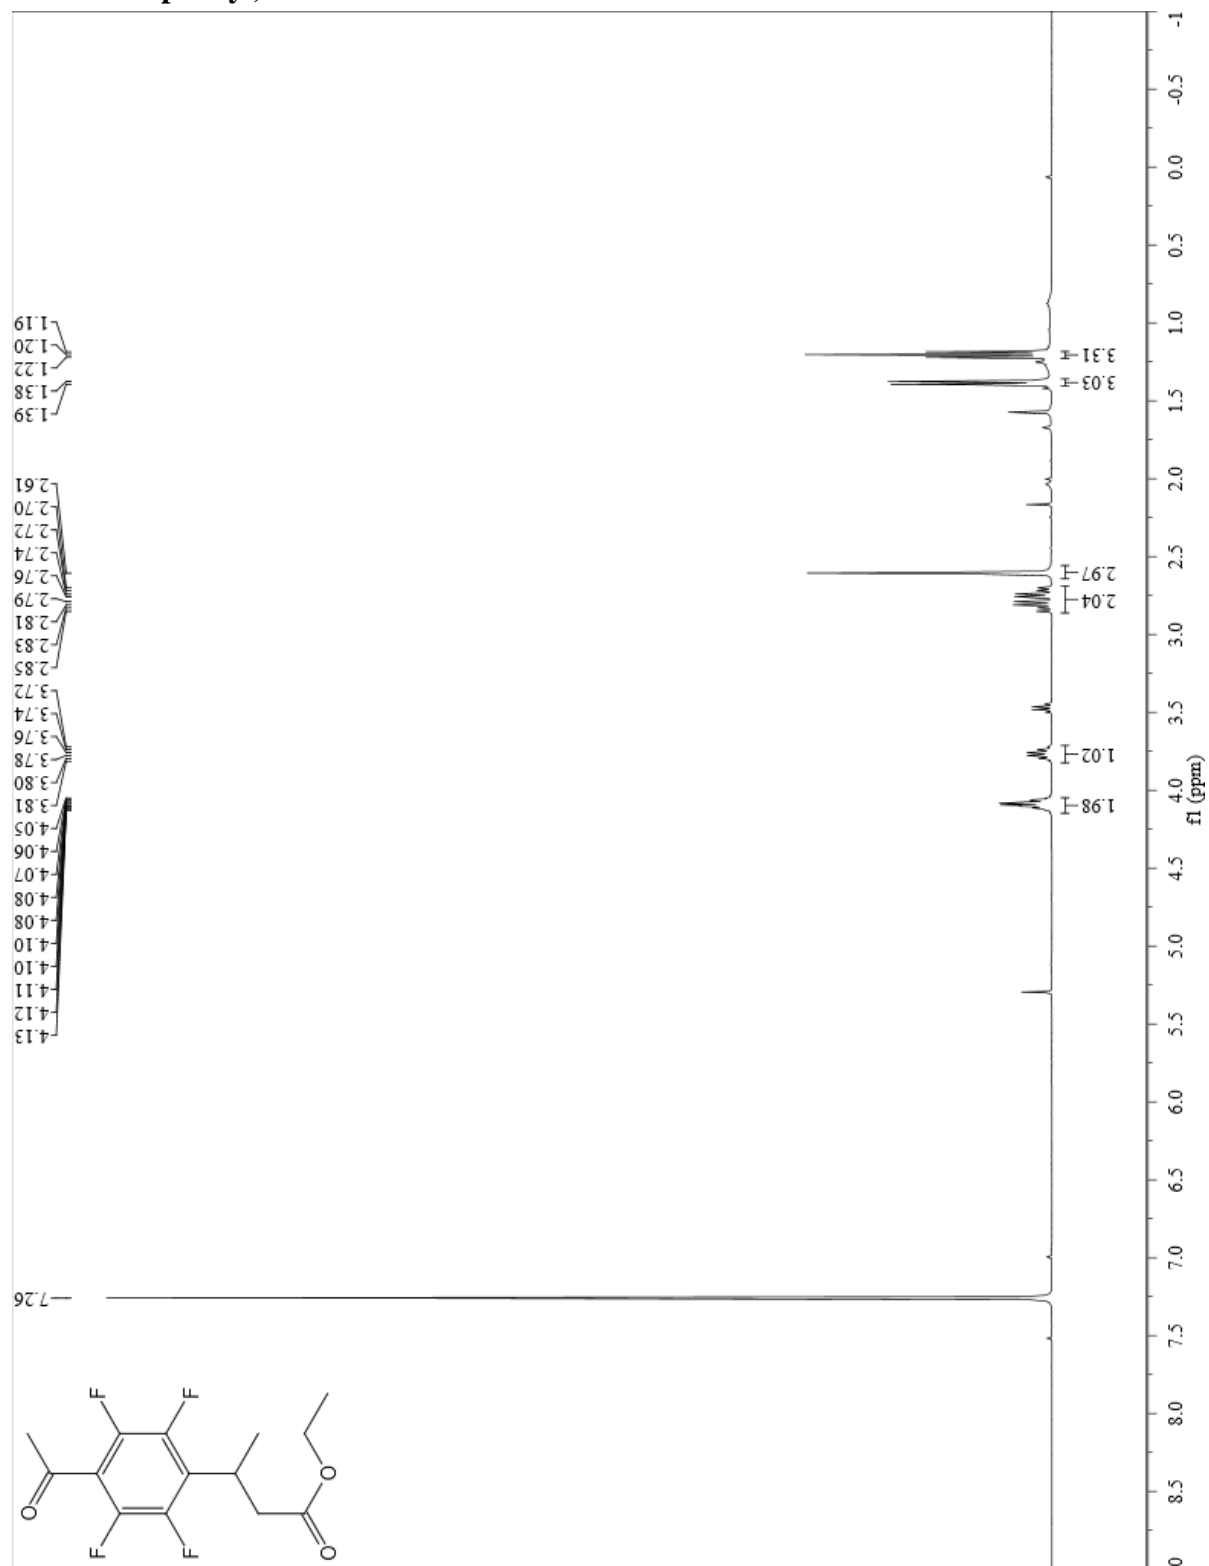

**$^{13}\text{C}\{^1\text{H}\}$  NMR (101 MHz, Chloroform-*d*, @ rt) of S-20a ethyl 3-(4-acetyl-2,3,5,6-tetrafluorophenyl)butanoate**

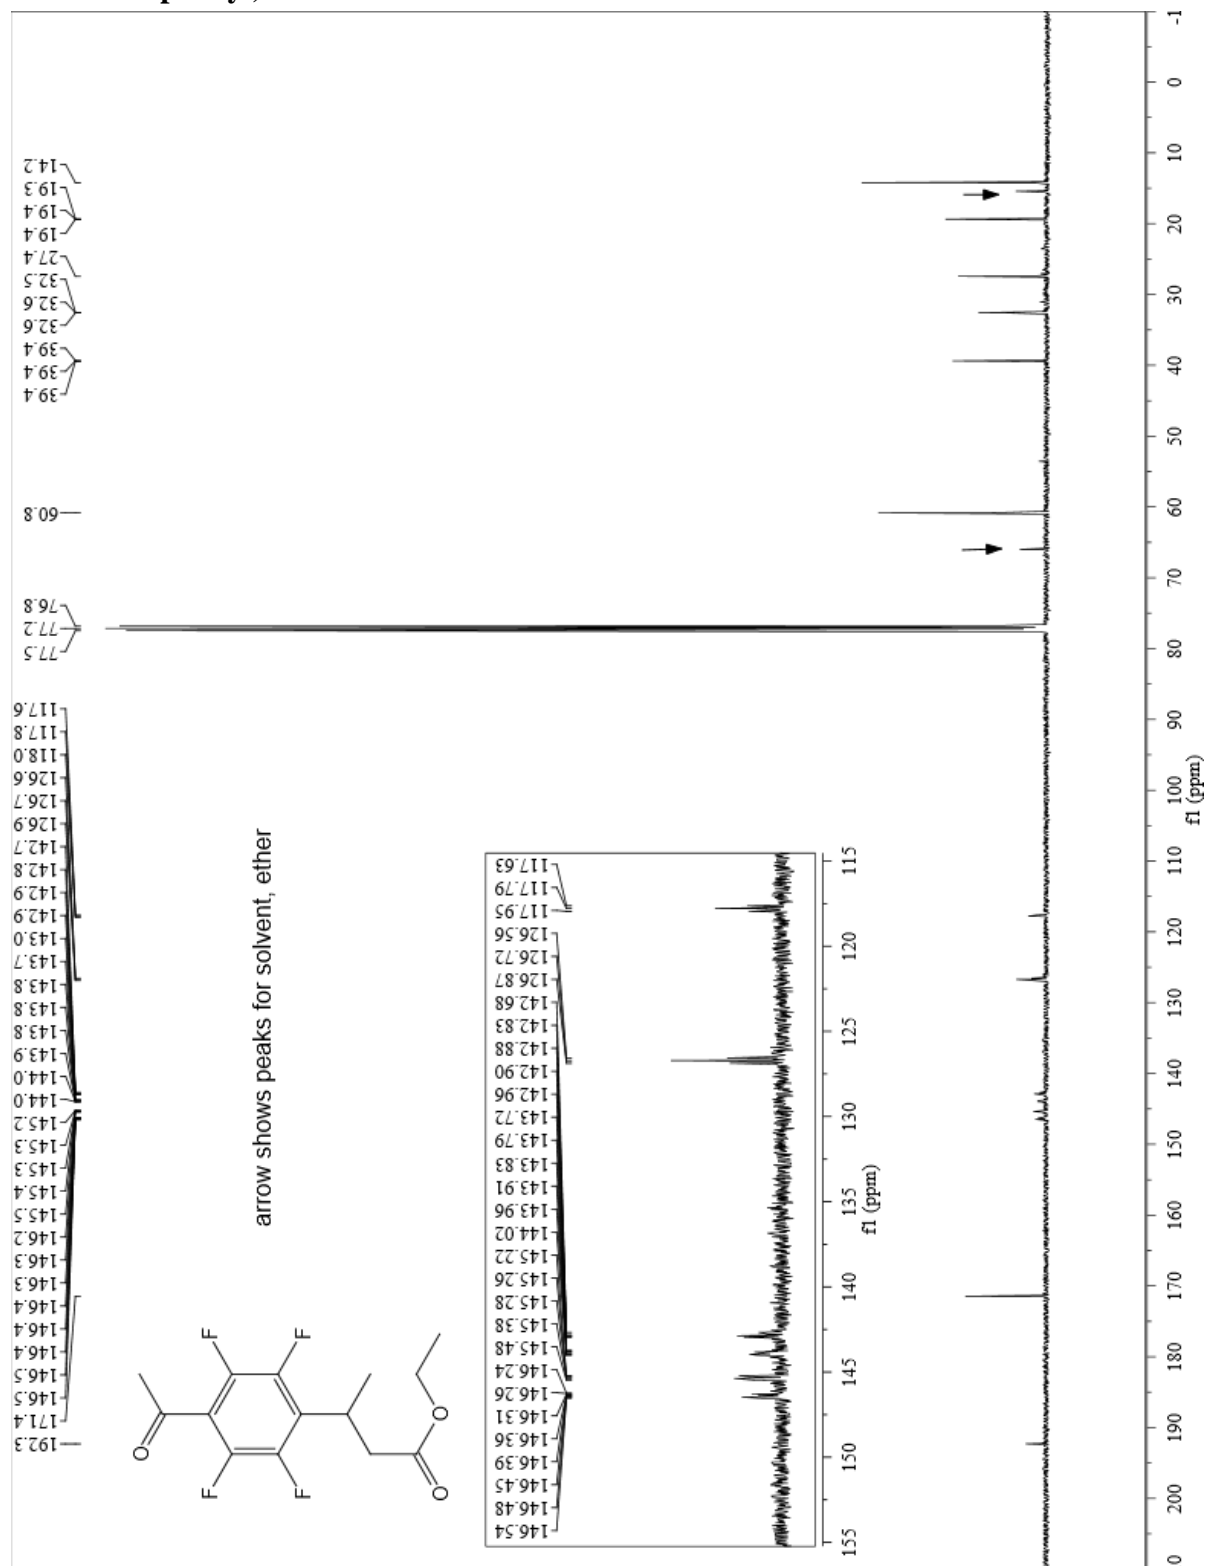

# GC and MS of S-20a ethyl 3-(4-acetyl-2,3,5,6-tetrafluorophenyl)butanoate

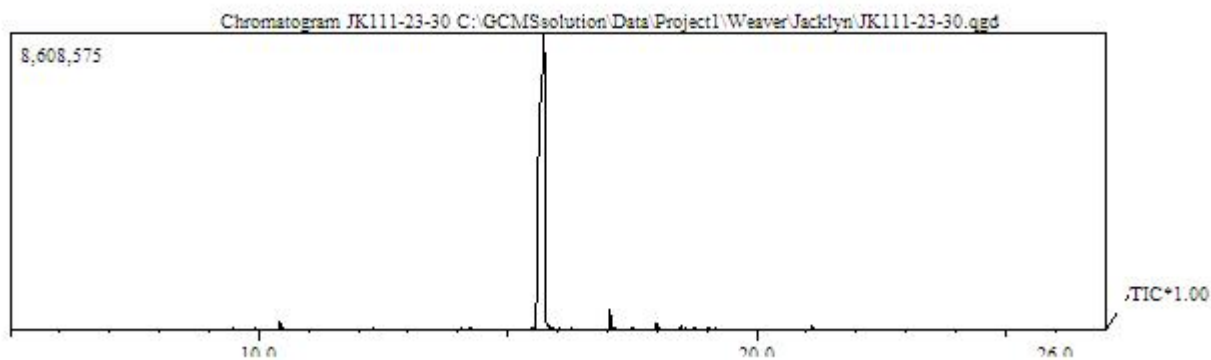

Spectrum

Line#:1 RTime:15.8(Scan#:1291)  
MassPeaks:123  
RawMode:Single 15.8(1291) BasePeak:43(219228)  
BG Mode:None

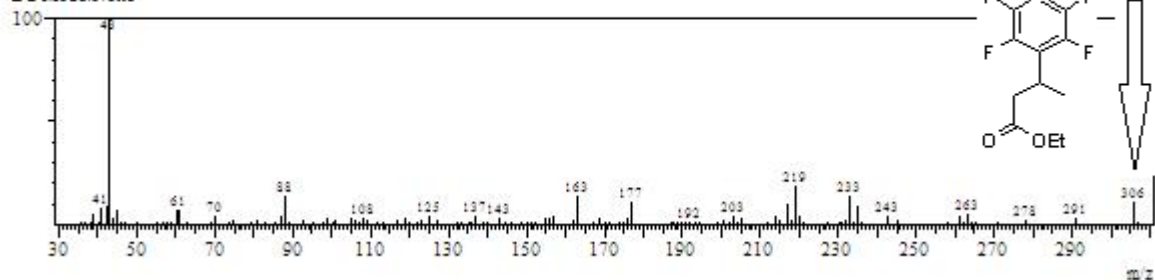

**<sup>19</sup>F NMR (376 MHz, Chloroform-*d*, @ rt) of S-21a 2,3,5,6-tetrafluoro-4-(2-methylcyclohexyl)benzonitrile (376 MHz, Chloroform-*d*, @ rt)**

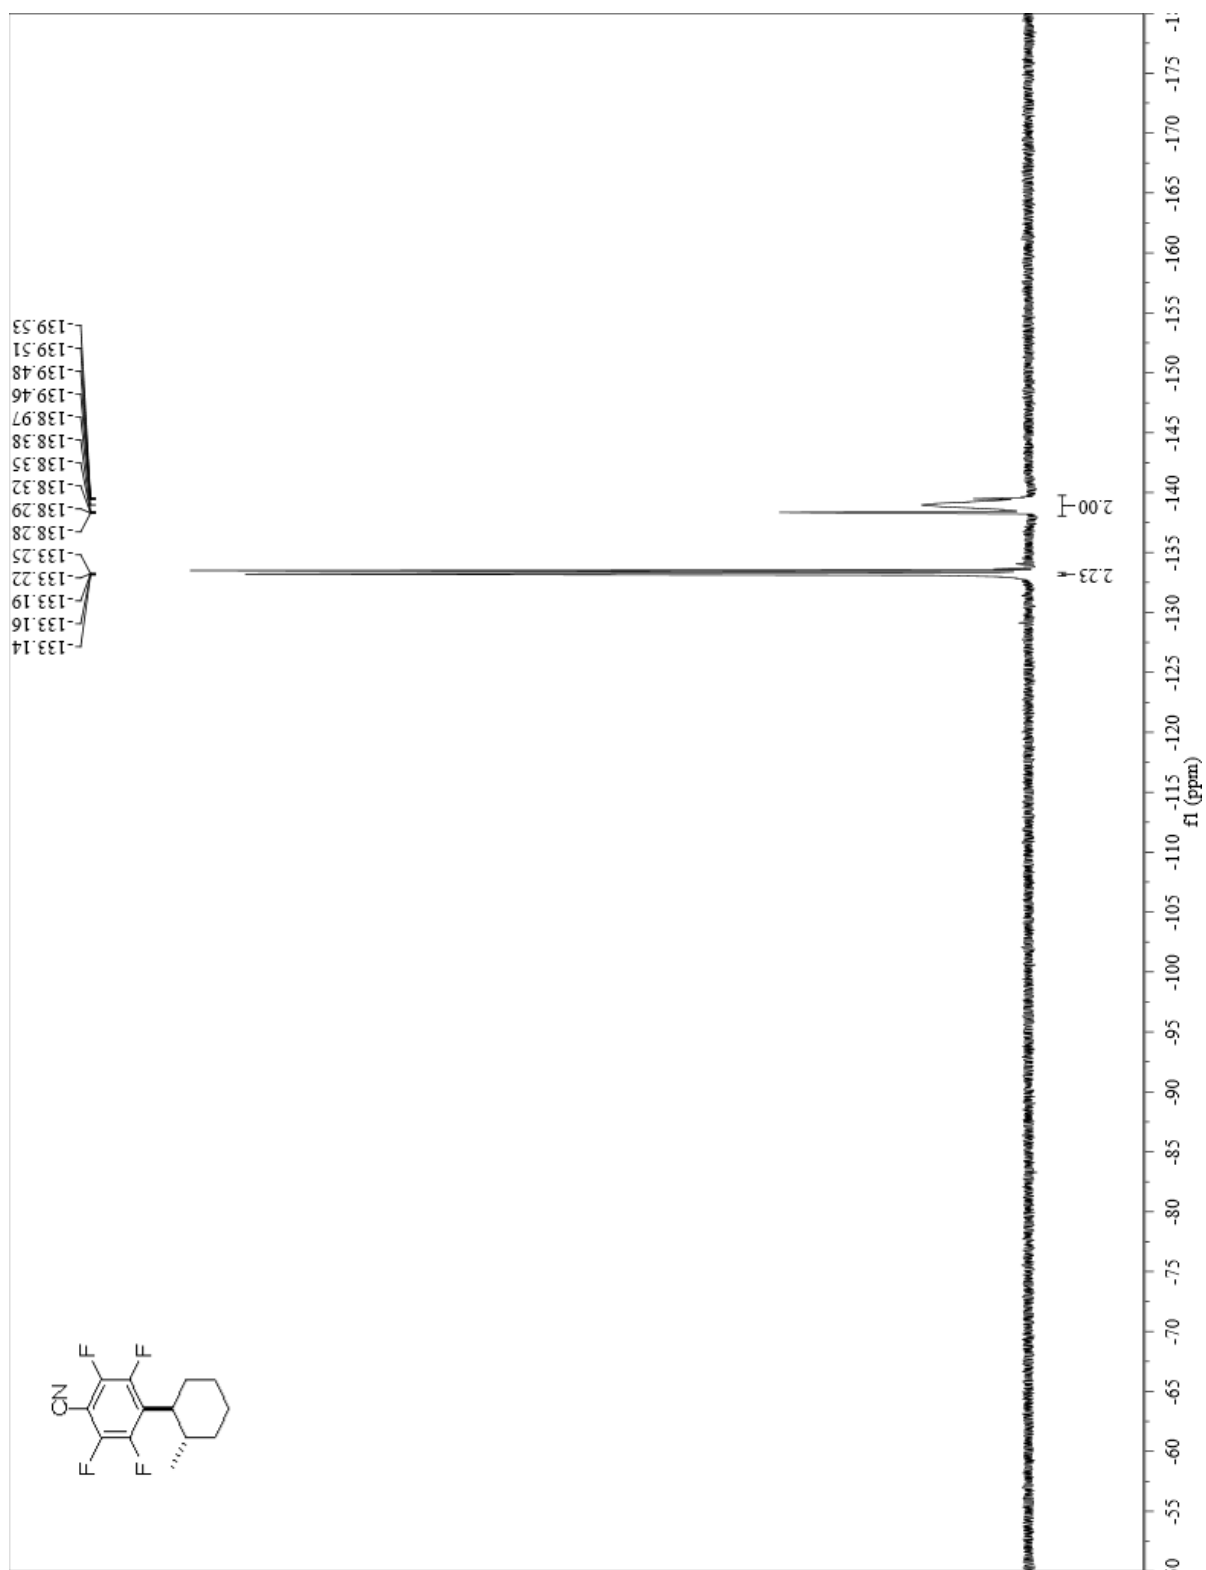



**<sup>1</sup>H NMR (400 MHz, Chloroform-*d*, @ rt) of S-21a 2,3,5,6-tetrafluoro-4-(2-methylcyclohexyl)benzonitrile**

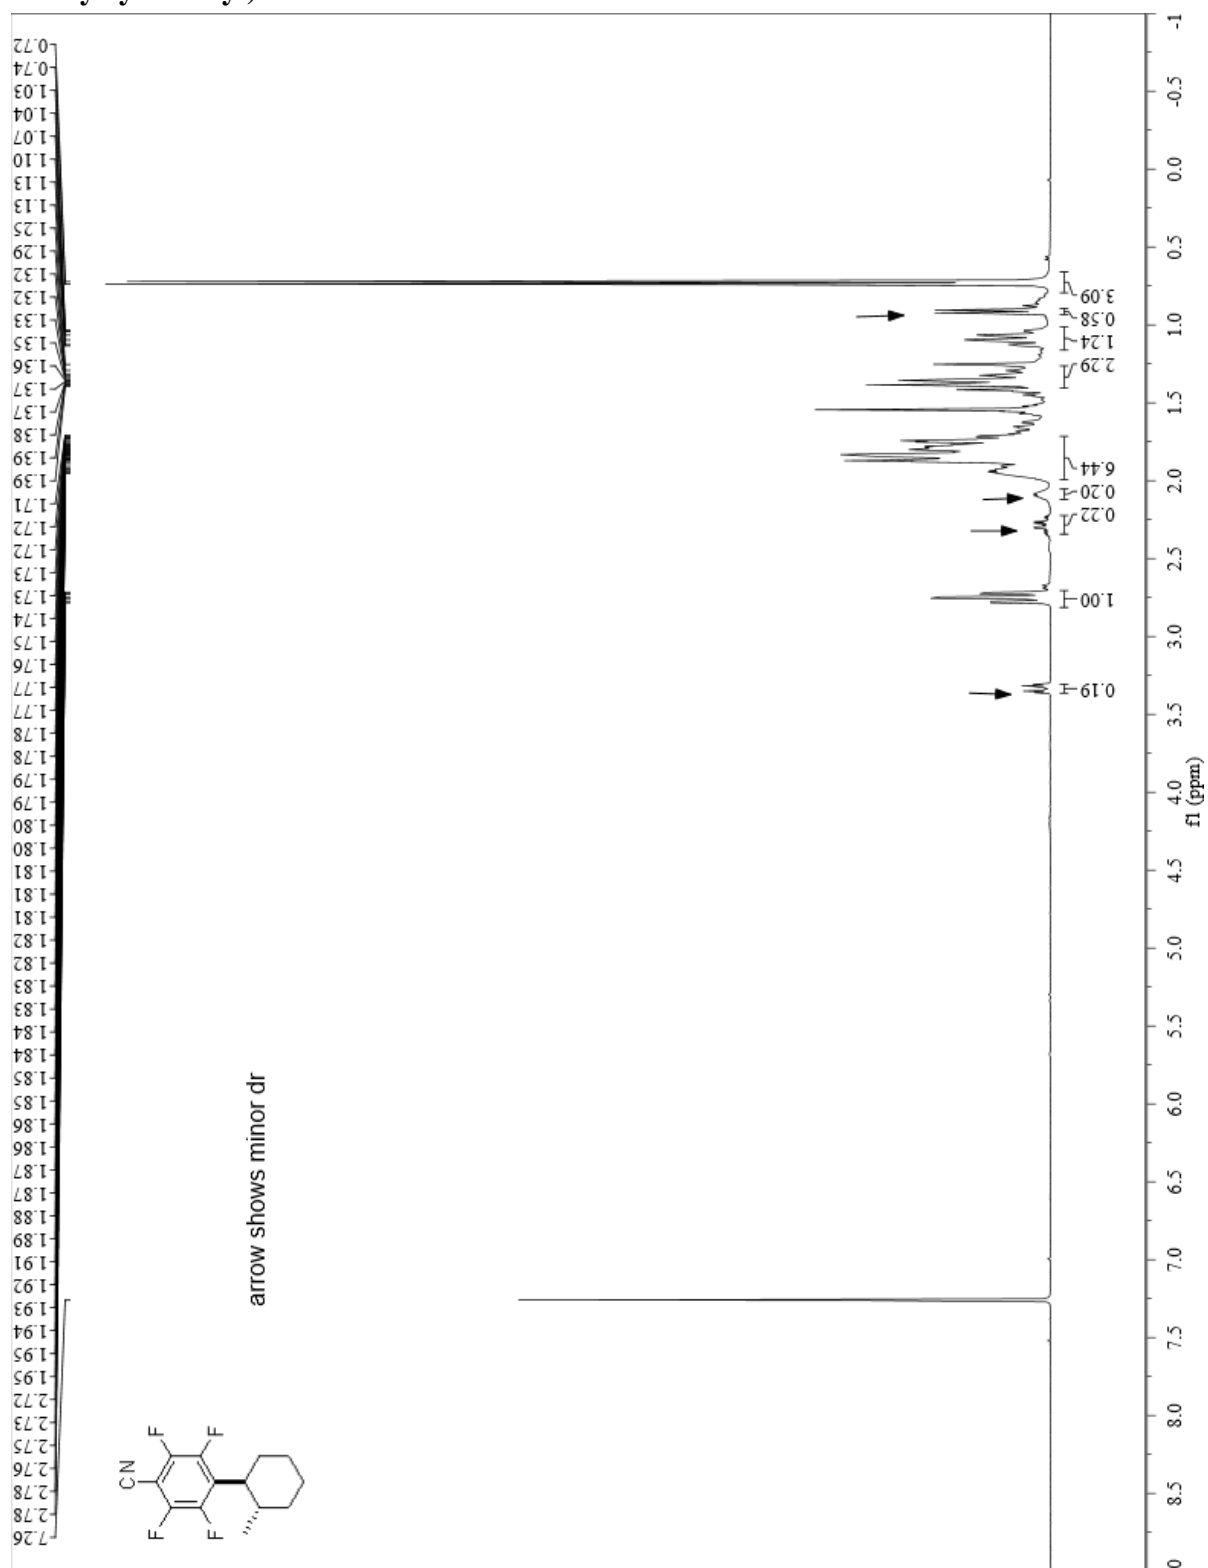



# GC and MS of S-21a 2,3,5,6-tetrafluoro-4-(2-methylcyclohexyl)benzonitrile

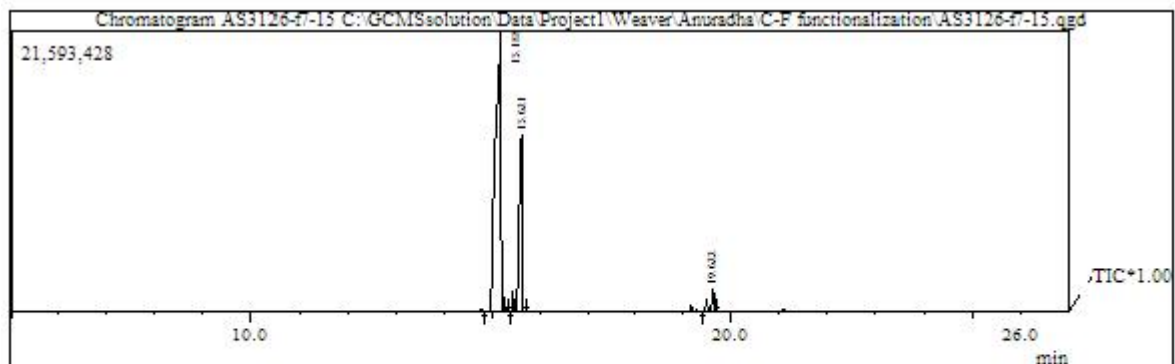

| Peak# | R.Time | I.Time | F.Time | Area      | Area%  | Height   | Height% | A/H  | Mark | Name |
|-------|--------|--------|--------|-----------|--------|----------|---------|------|------|------|
| 1     | 15.188 | 14.833 | 15.342 | 171835763 | 73.21  | 21562792 | 58.65   | 7.97 | MI   |      |
| 2     | 15.621 | 15.375 | 15.742 | 55503076  | 23.65  | 13545163 | 36.84   | 4.09 | MI   |      |
| 3     | 19.622 | 19.383 | 19.717 | 7372916   | 3.14   | 1657393  | 4.51    | 4.44 | MI   |      |
|       |        |        |        | 234731755 | 100.00 | 36765348 | 100.00  |      |      |      |

Line#:2 R.Time:15.0(Scan#:1205)  
 MassPeaks:189  
 RawMode:Single 15.0(1205) BasePeak:55(1161374)  
 BG Mode:None

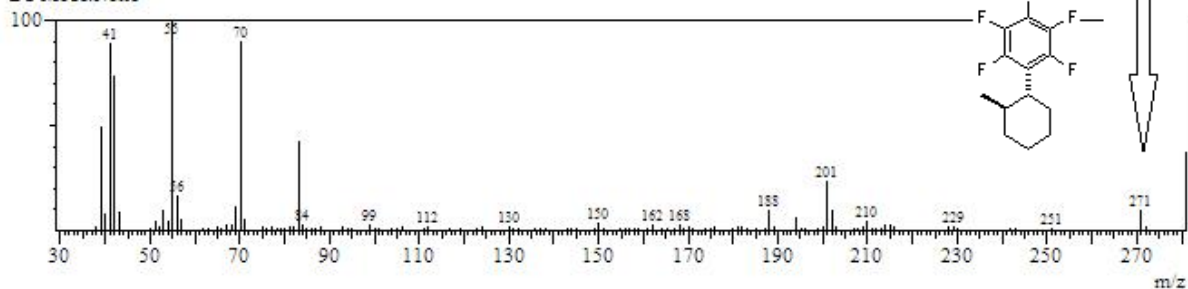

Line#:3 R.Time:15.6(Scan#:1278)  
 MassPeaks:67  
 RawMode:Single 15.6(1278) BasePeak:41(79575)  
 BG Mode:None

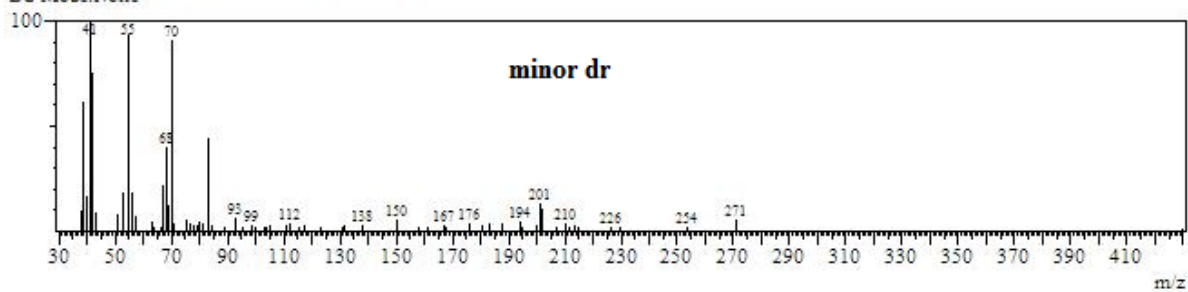

**<sup>19</sup>F NMR (376 MHz, Chloroform-*d*, @ rt) of S-22a 7-cyclohexyl-4,5,6-trifluoro-2-phenylbenzofuran**

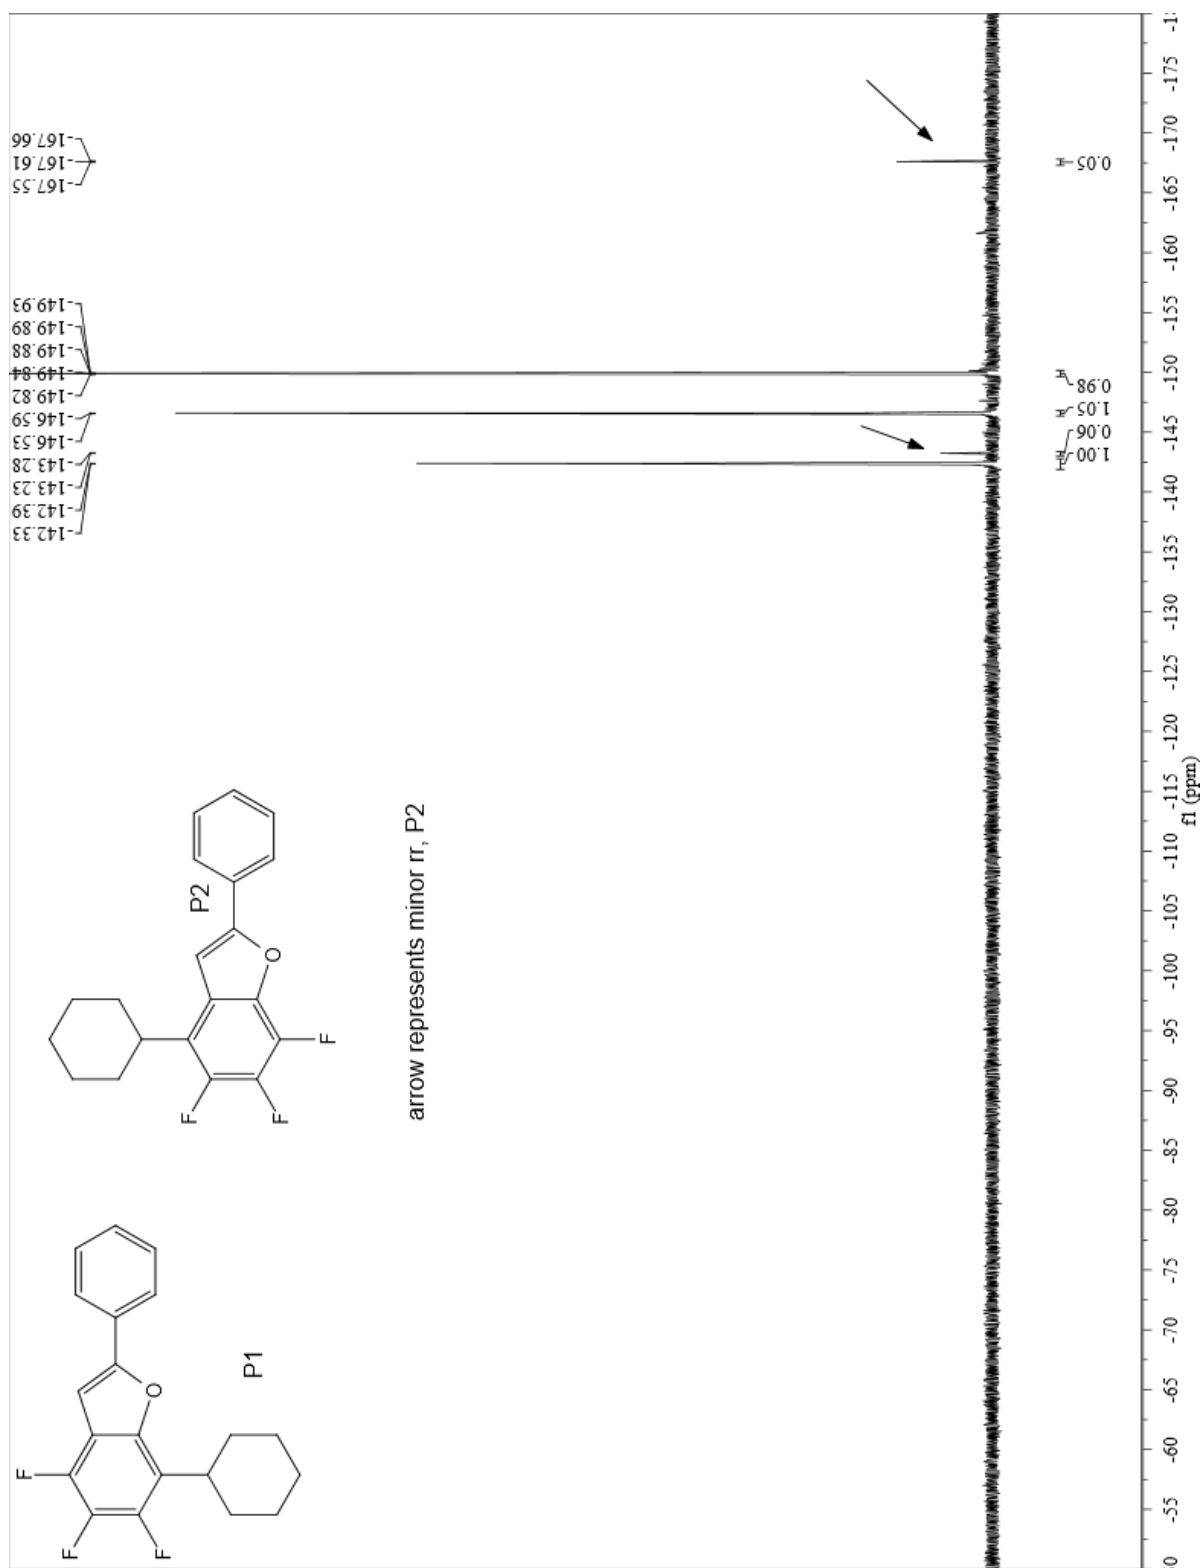

**<sup>1</sup>H NMR (400 MHz, Chloroform-*d*, @ rt) of S-22a 7-cyclohexyl-4,5,6-trifluoro-2-phenylbenzofuran**

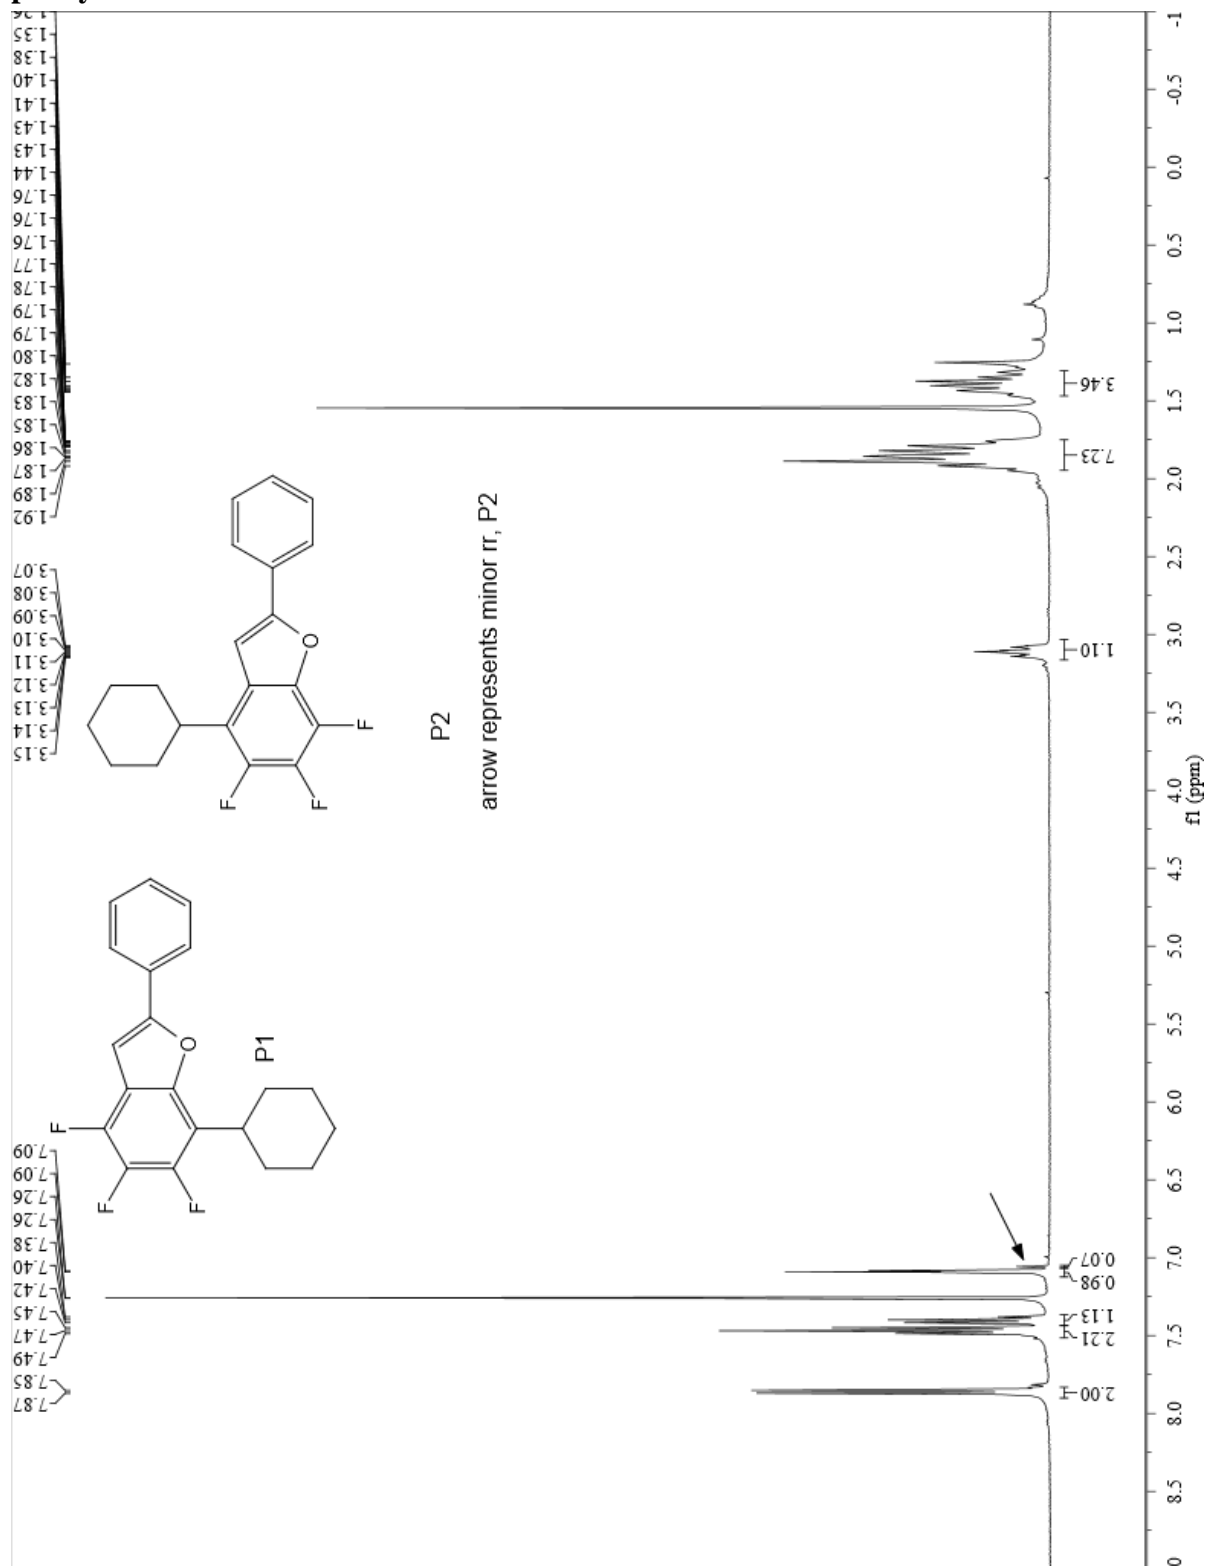

**$^{13}\text{C}\{^1\text{H}\}$  NMR (101 MHz, Chloroform-*d*, @ rt) of S-22a 7-cyclohexyl-4,5,6-trifluoro-2-phenylbenzofuran**

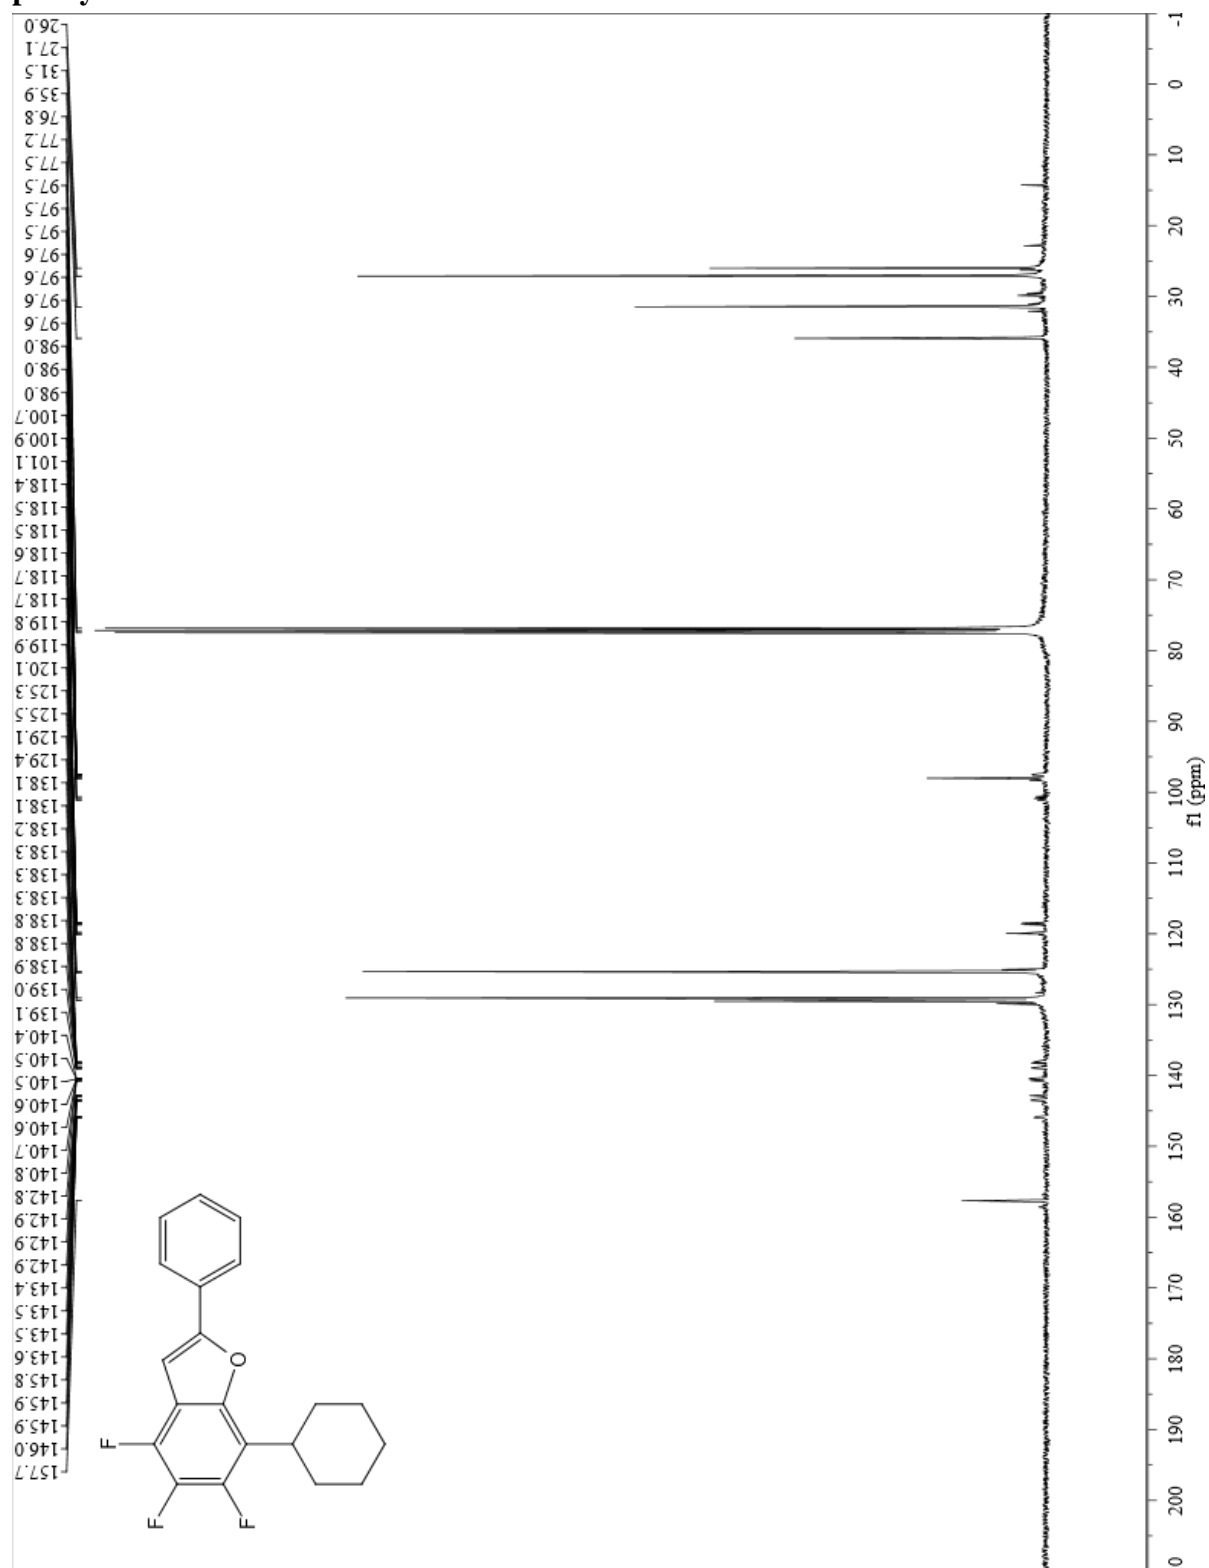

# GC and MS of S-22a 7-cyclohexyl-4,5,6-trifluoro-2-phenylbenzofuran

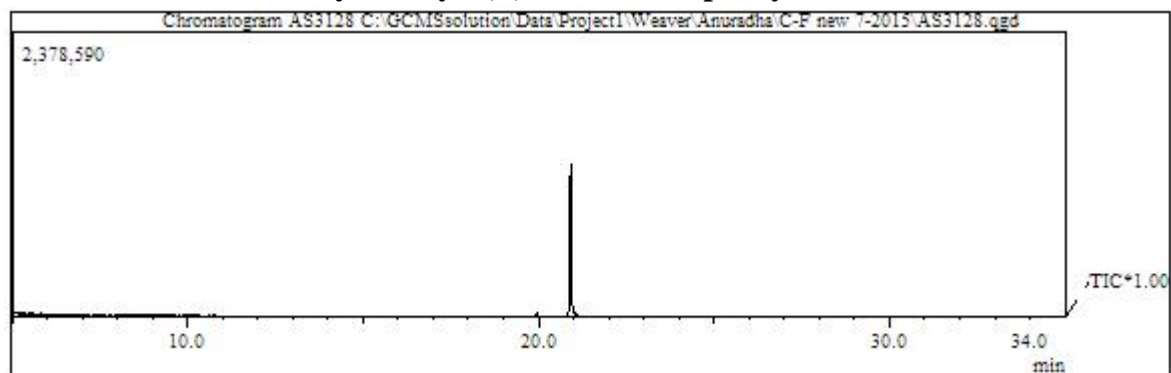

Line#:1 RTime:20.9(Scan#:1910)  
MassPeaks:180  
RawMode:Single 20.9(1910) BasePeak:330(112109)  
BG Mode:None

Spectrum

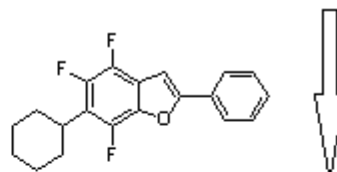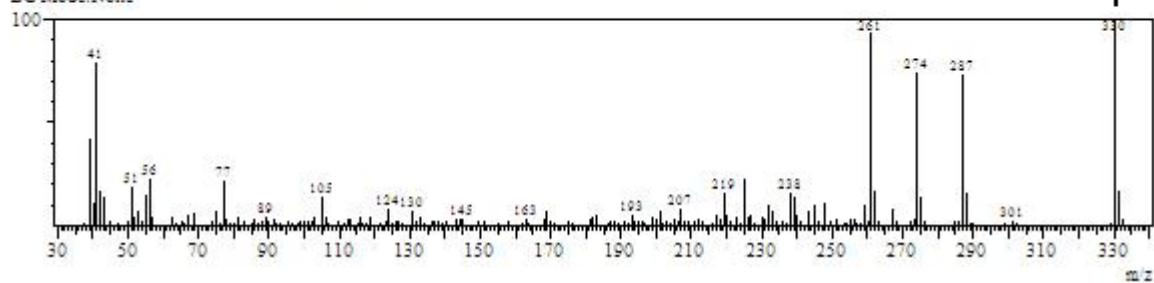

**<sup>19</sup>F NMR (376 MHz, Chloroform-*d*, @ rt) of S-23a 2-(2,4,5-trifluoro-3-phenoxy-6-(trifluoromethyl)phenyl)bicyclo[2.2.1]heptane**

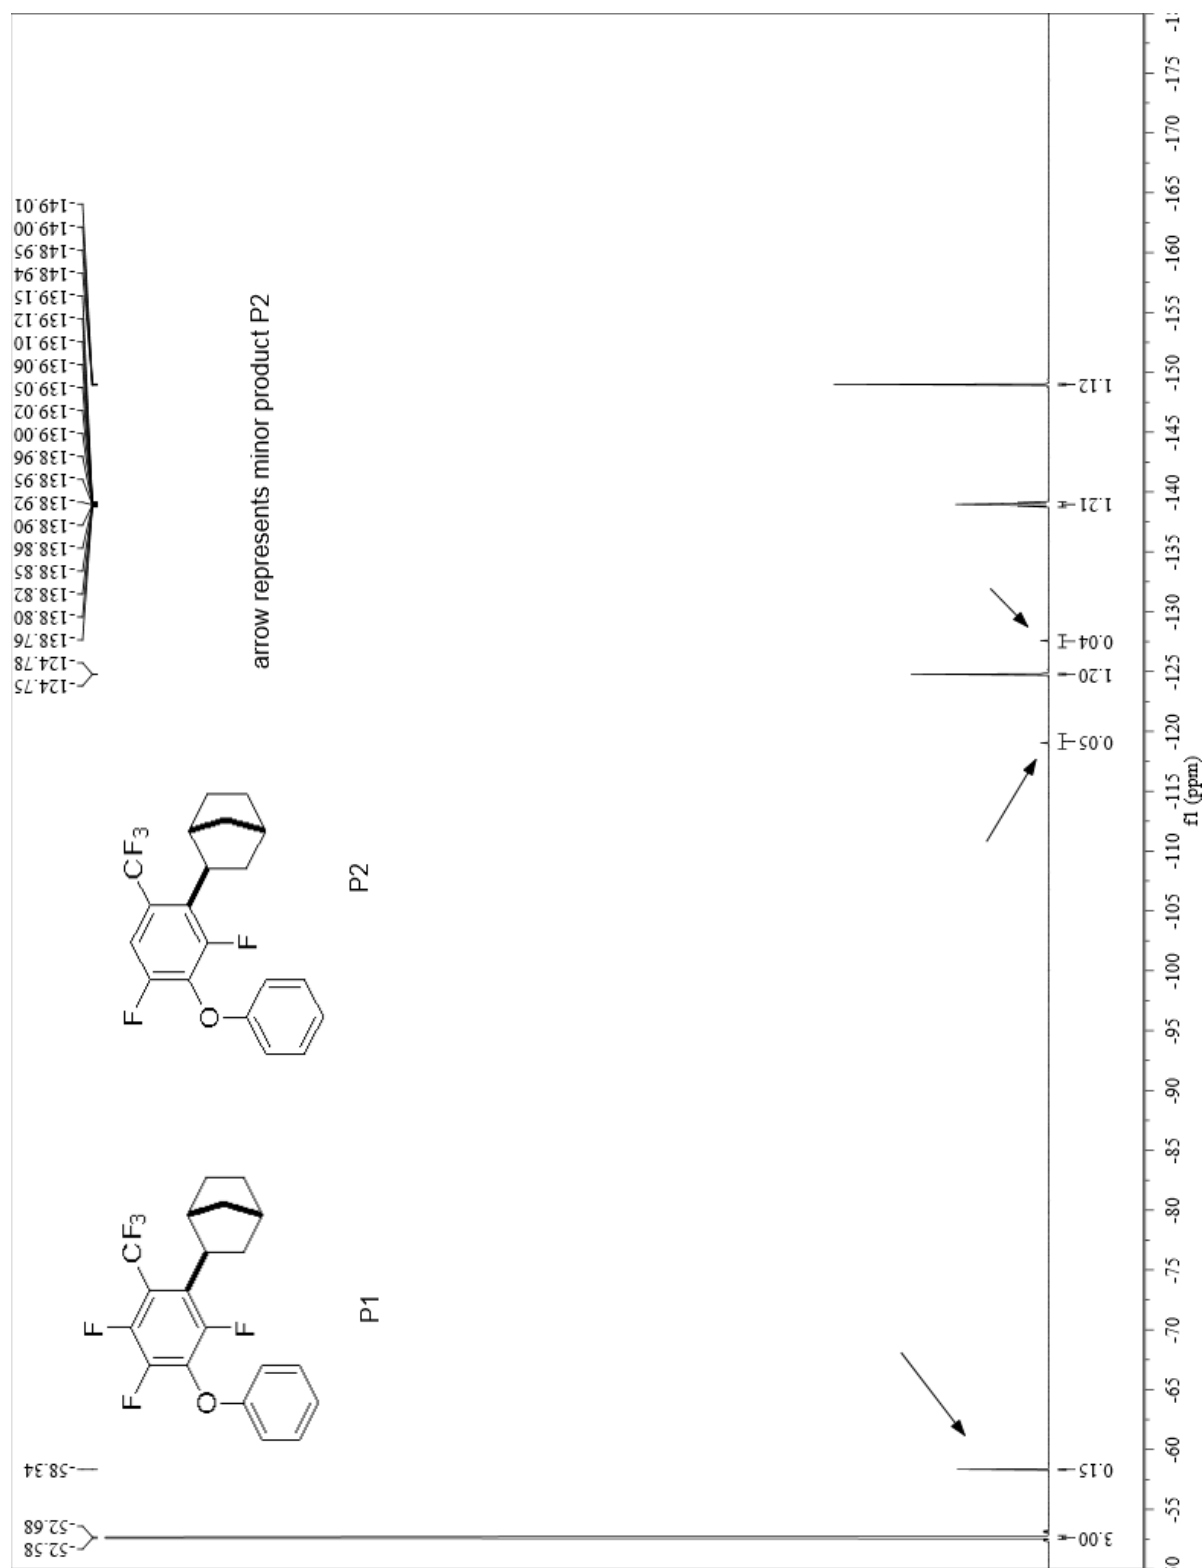



**<sup>1</sup>H NMR (400 MHz, Chloroform-*d*, @ rt) of S-23a 2-(2,4,5-trifluoro-3-phenoxy-6-(trifluoromethyl)phenyl)bicyclo[2.2.1]heptane**

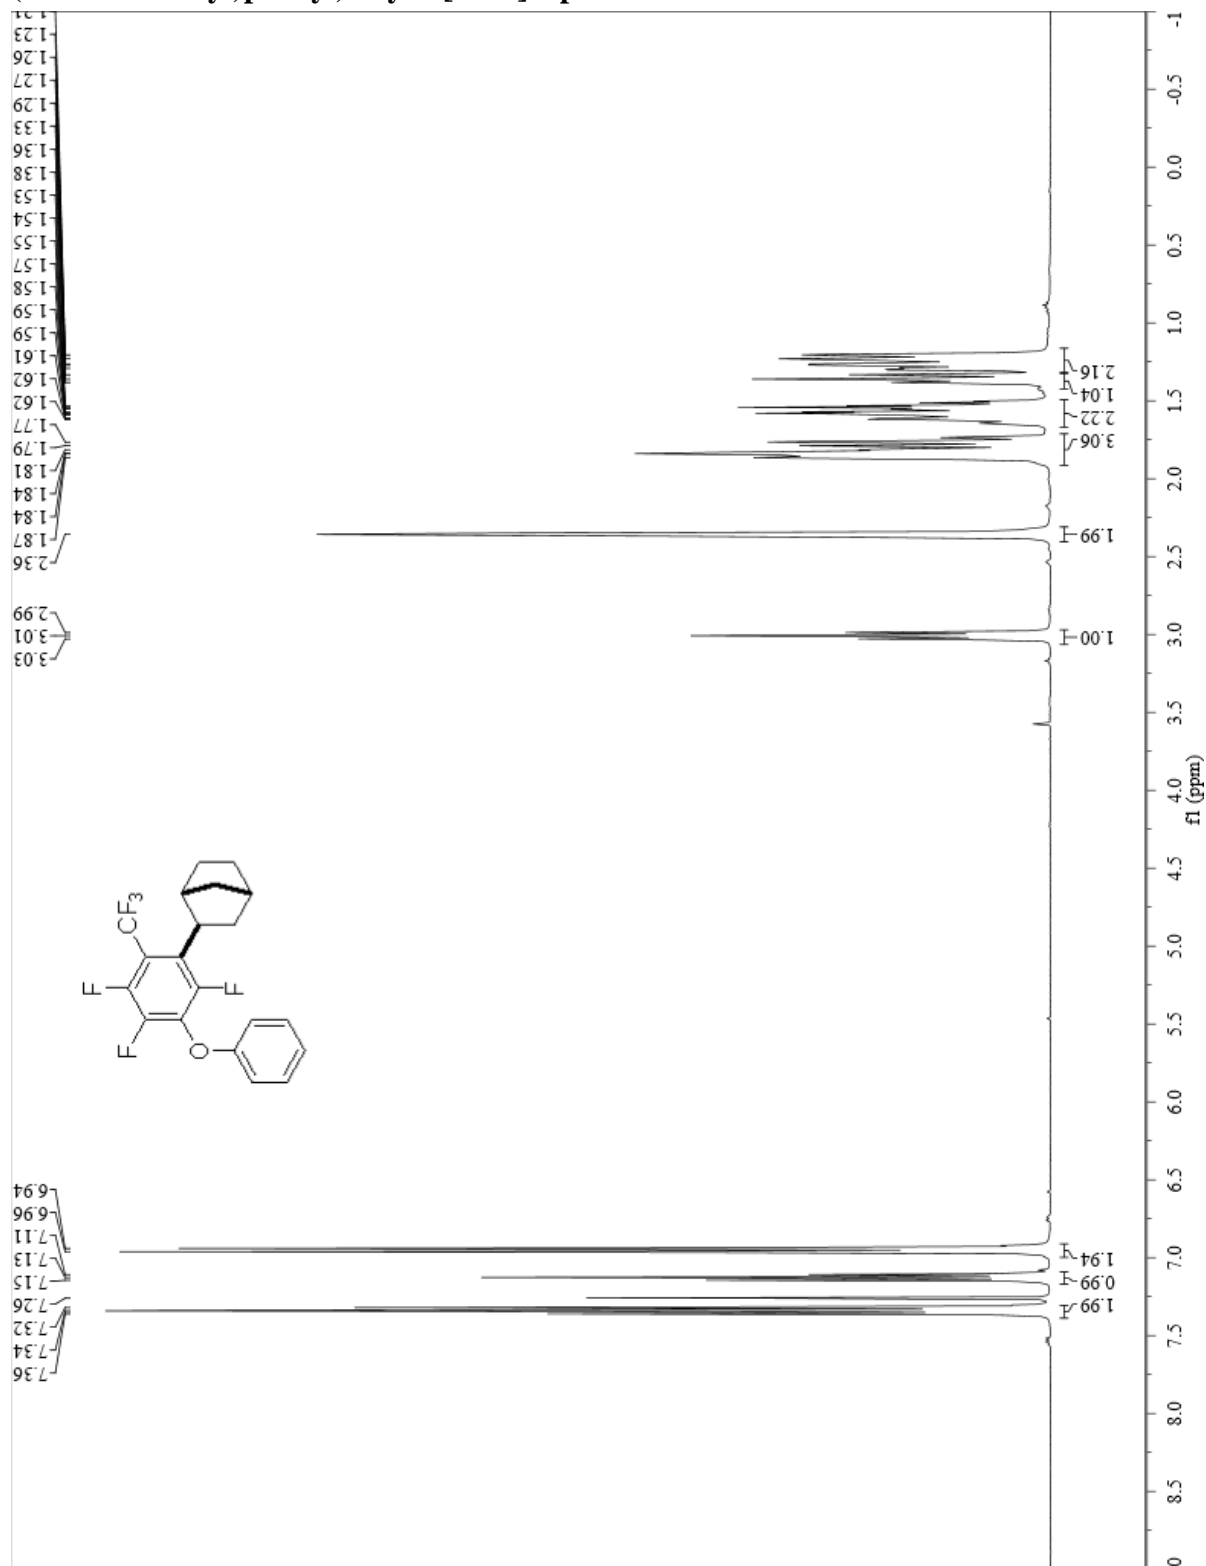



**GC and MS of S-23a 2-(2,4,5-trifluoro-3-phenoxy-6-(trifluoromethyl)phenyl)bicyclo[2.2.1]heptane**

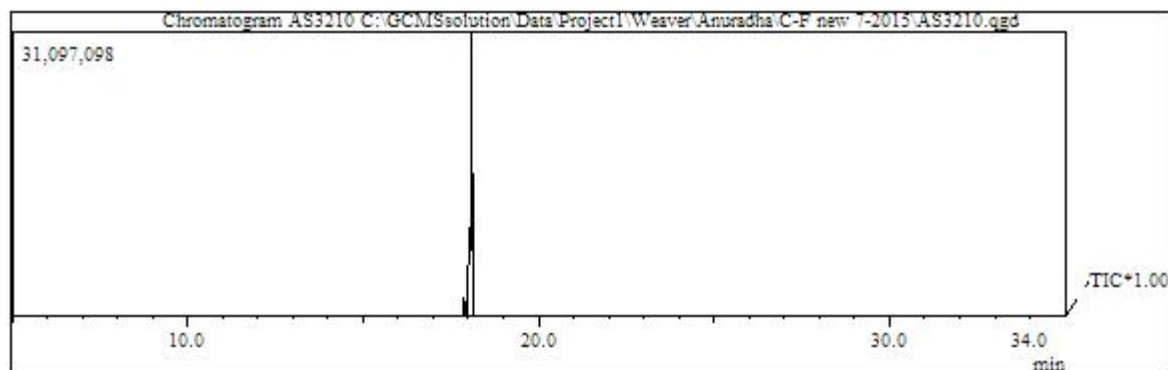

Line#1 RTime:18.1(Scan#:1573)  
 MassPeaks:303  
 RawMode:Single 18.1(1573) BasePeak:77(4184777)  
 BG Mode:None

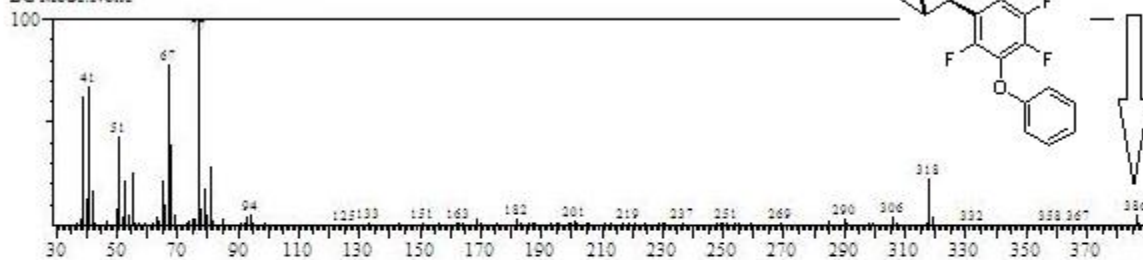

MassPeaks:289  
 RawMode:Single 18.0(1564) BasePeak:77(1378977)  
 BG Mode:None

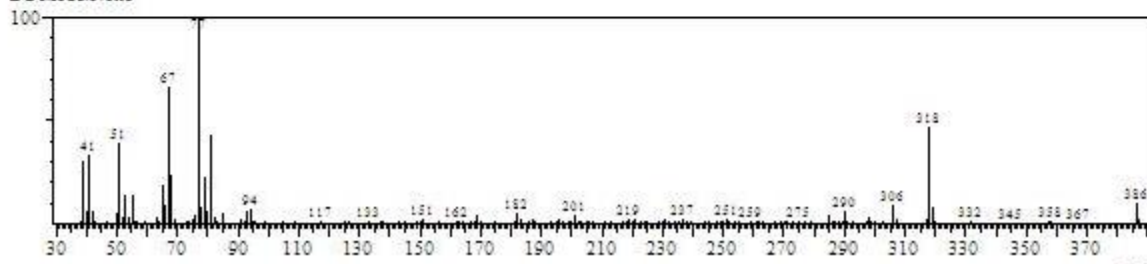

**<sup>19</sup>F NMR (376 MHz, Chloroform-*d*, @ rt) of S-24a methyl 2-(bicyclo[2.2.1]heptan-2-yl)-3,5,6-trifluoro-4-(2-methoxy-2-oxoethyl)benzoate**

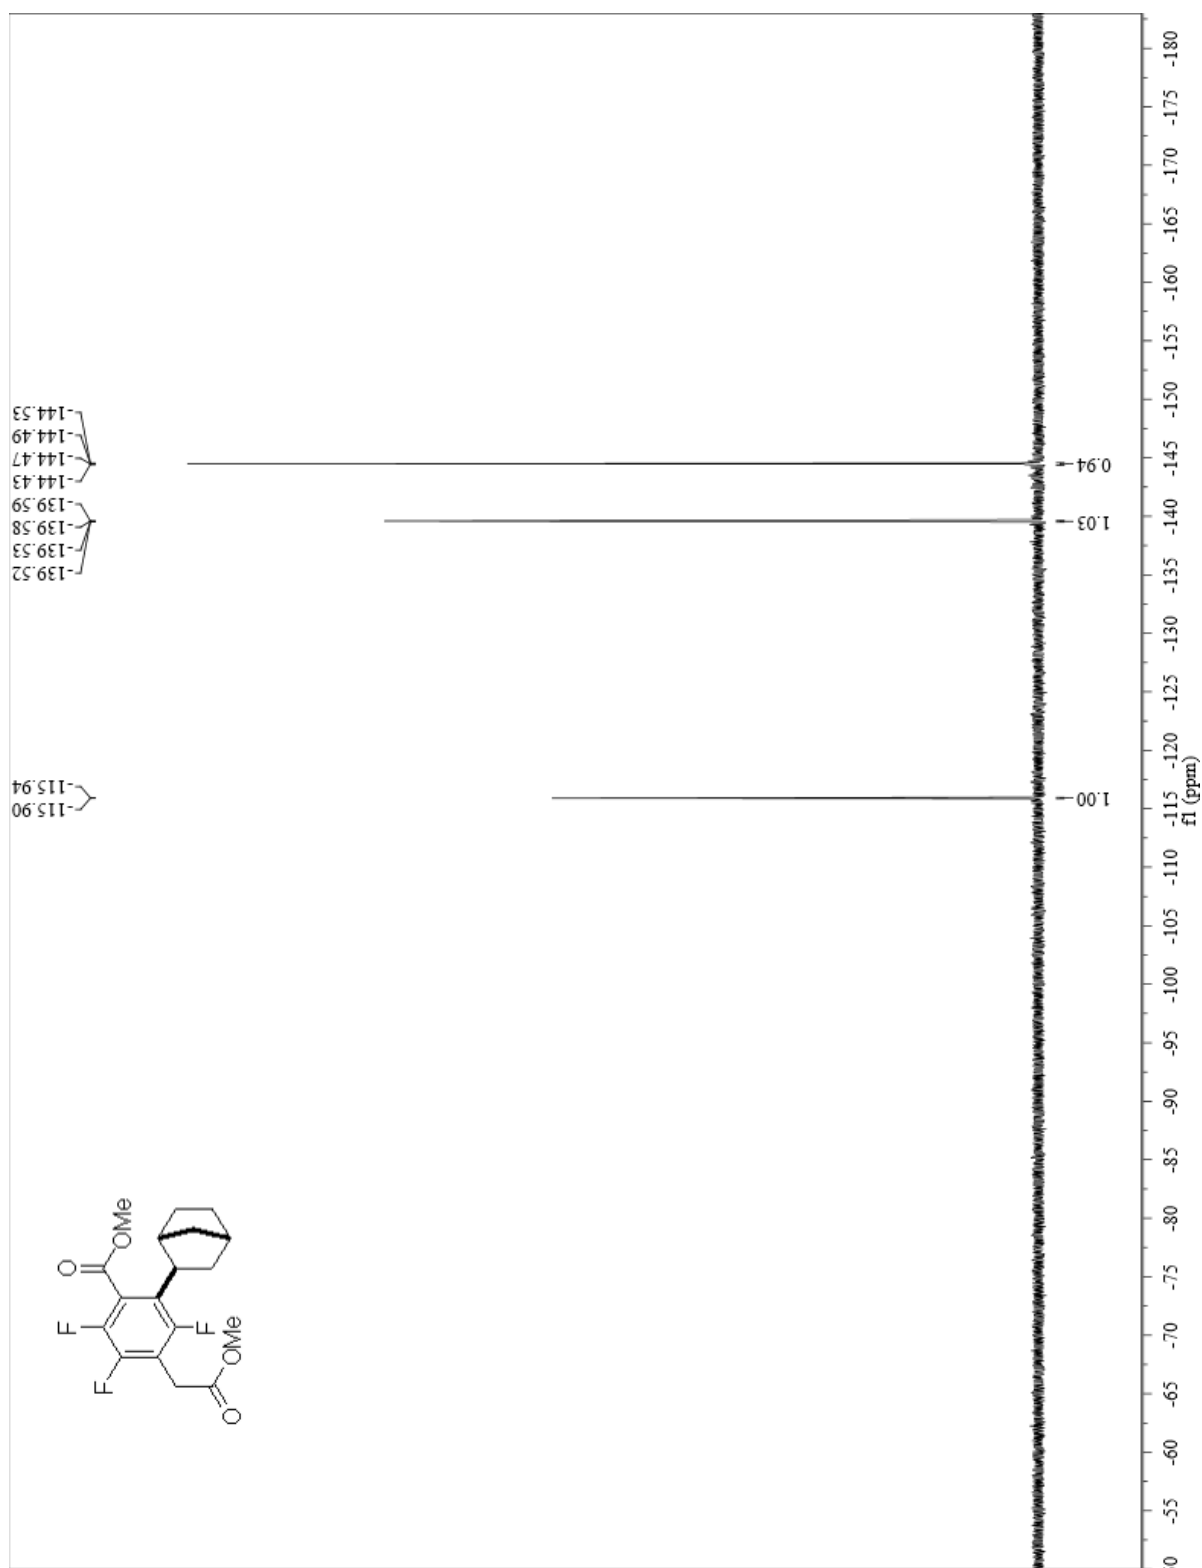

**<sup>1</sup>H NMR (400 MHz, Chloroform-*d*, @ rt) of S-24a methyl 2-(bicyclo[2.2.1]heptan-2-yl)-3,5,6-trifluoro-4-(2-methoxy-2-oxoethyl)benzoate**

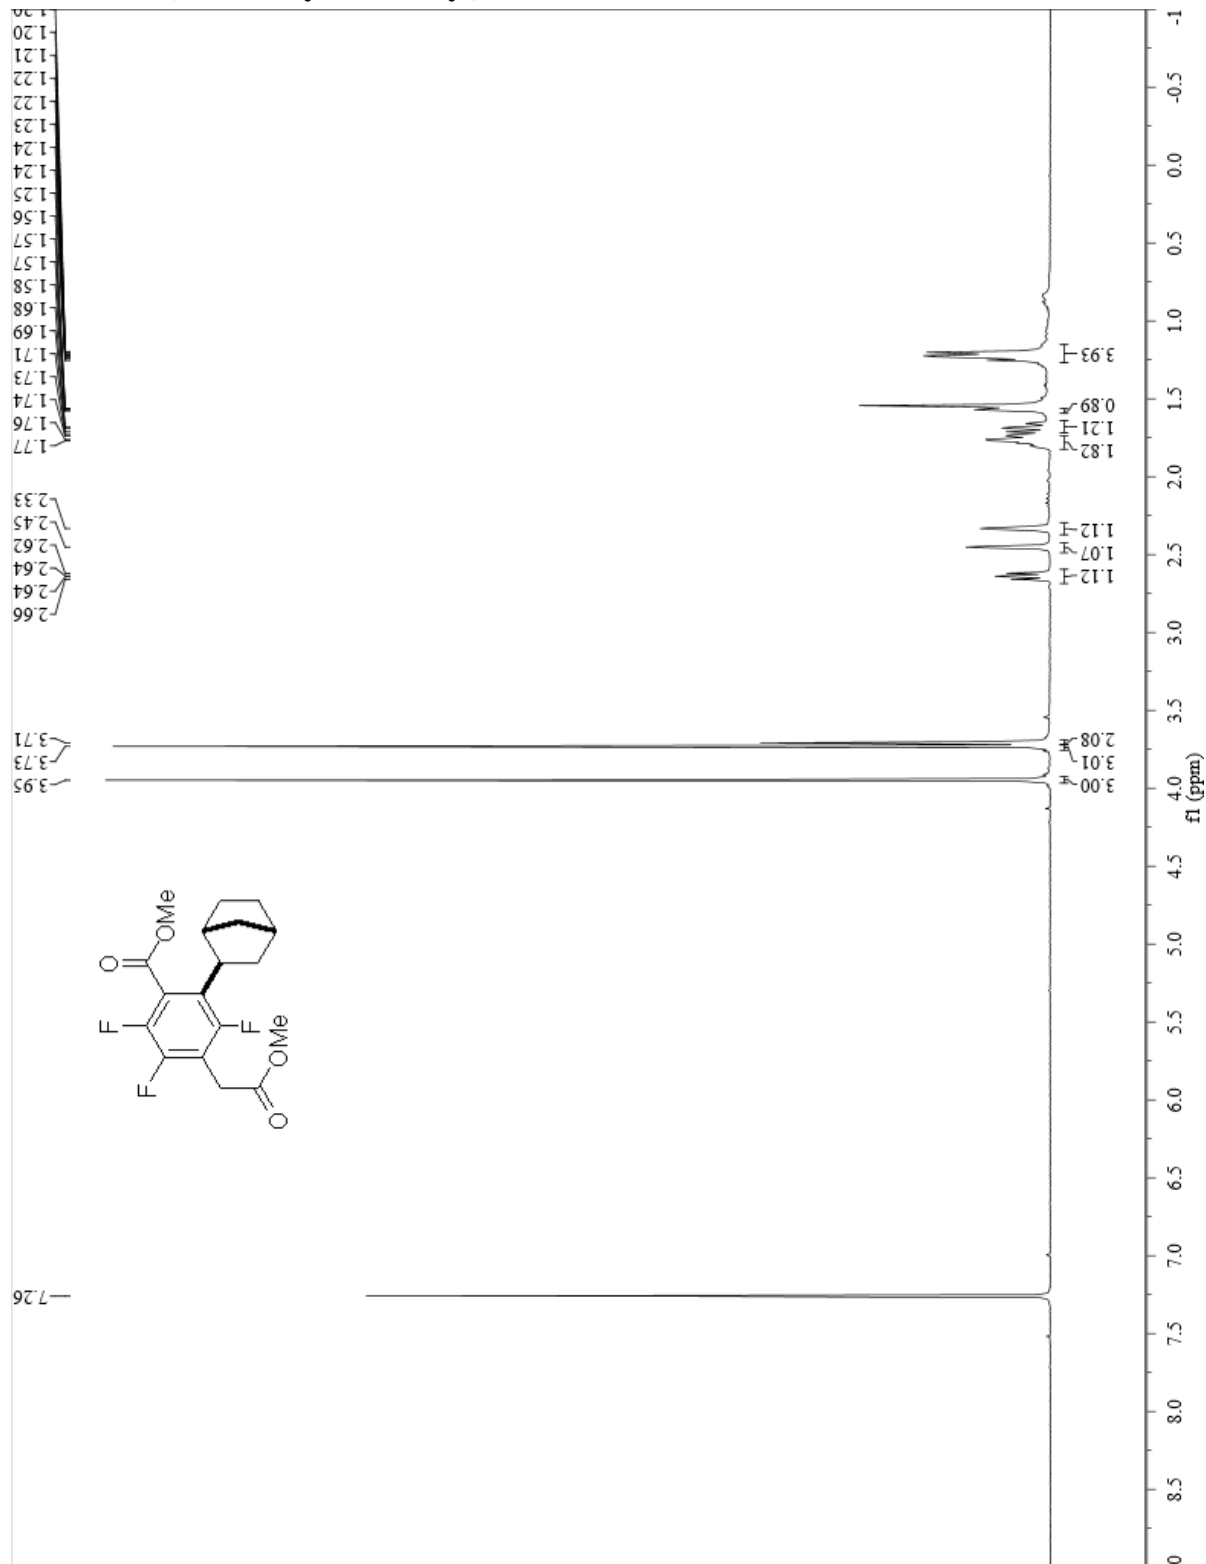



# GC and MS of S-24a methyl 2-(bicyclo[2.2.1]heptan-2-yl)-3,5,6-trifluoro-4-(2-methoxy-2-oxoethyl)benzoate

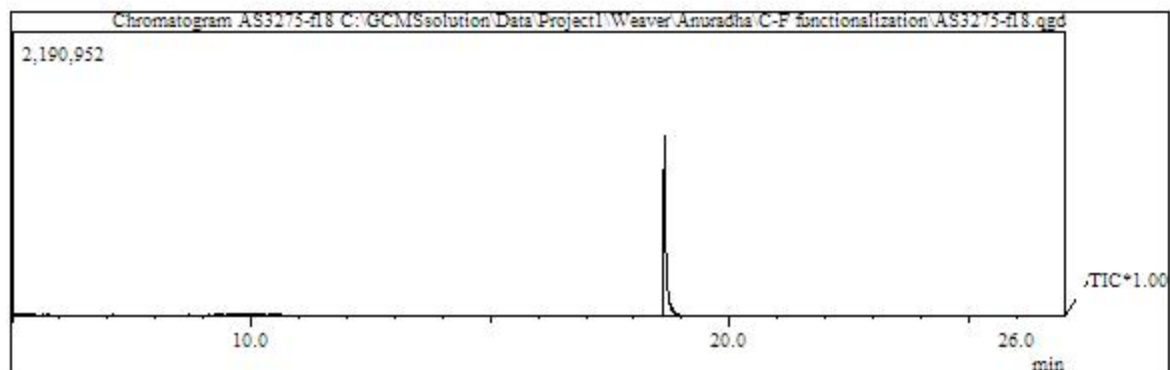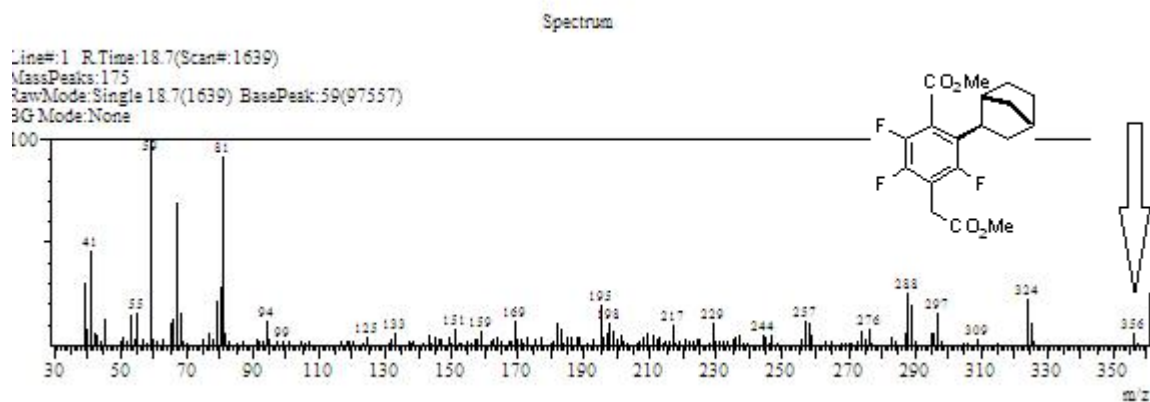

**<sup>19</sup>F NMR (376 MHz, Chloroform-*d*, @ rt) of S-25a N-(3-(bicyclo[2.2.1]heptan-2-yl)-2,5,6-trifluoro-4-(trifluoromethyl)phenyl)acetamide**

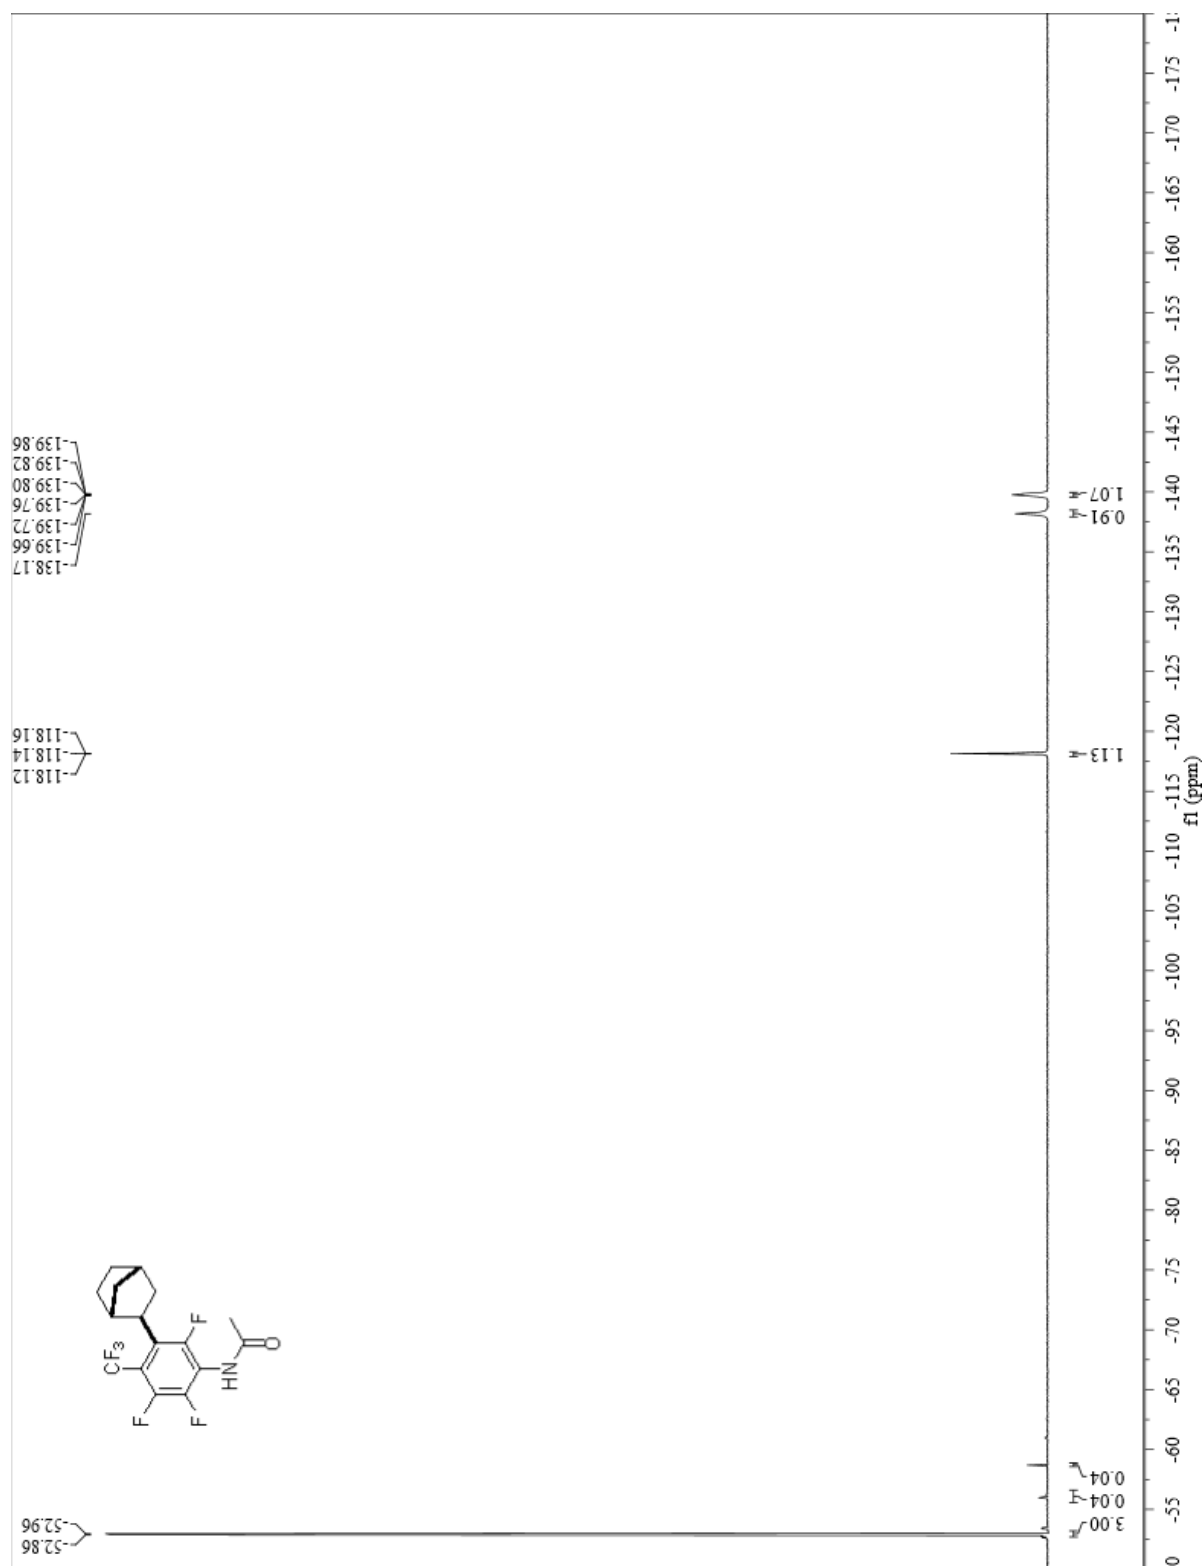



**<sup>1</sup>H NMR (400 MHz, Chloroform-*d*, @ rt) of S-25a N-(3-(bicyclo[2.2.1]heptan-2-yl)-2,5,6-trifluoro-4-(trifluoromethyl)phenyl)acetamide**

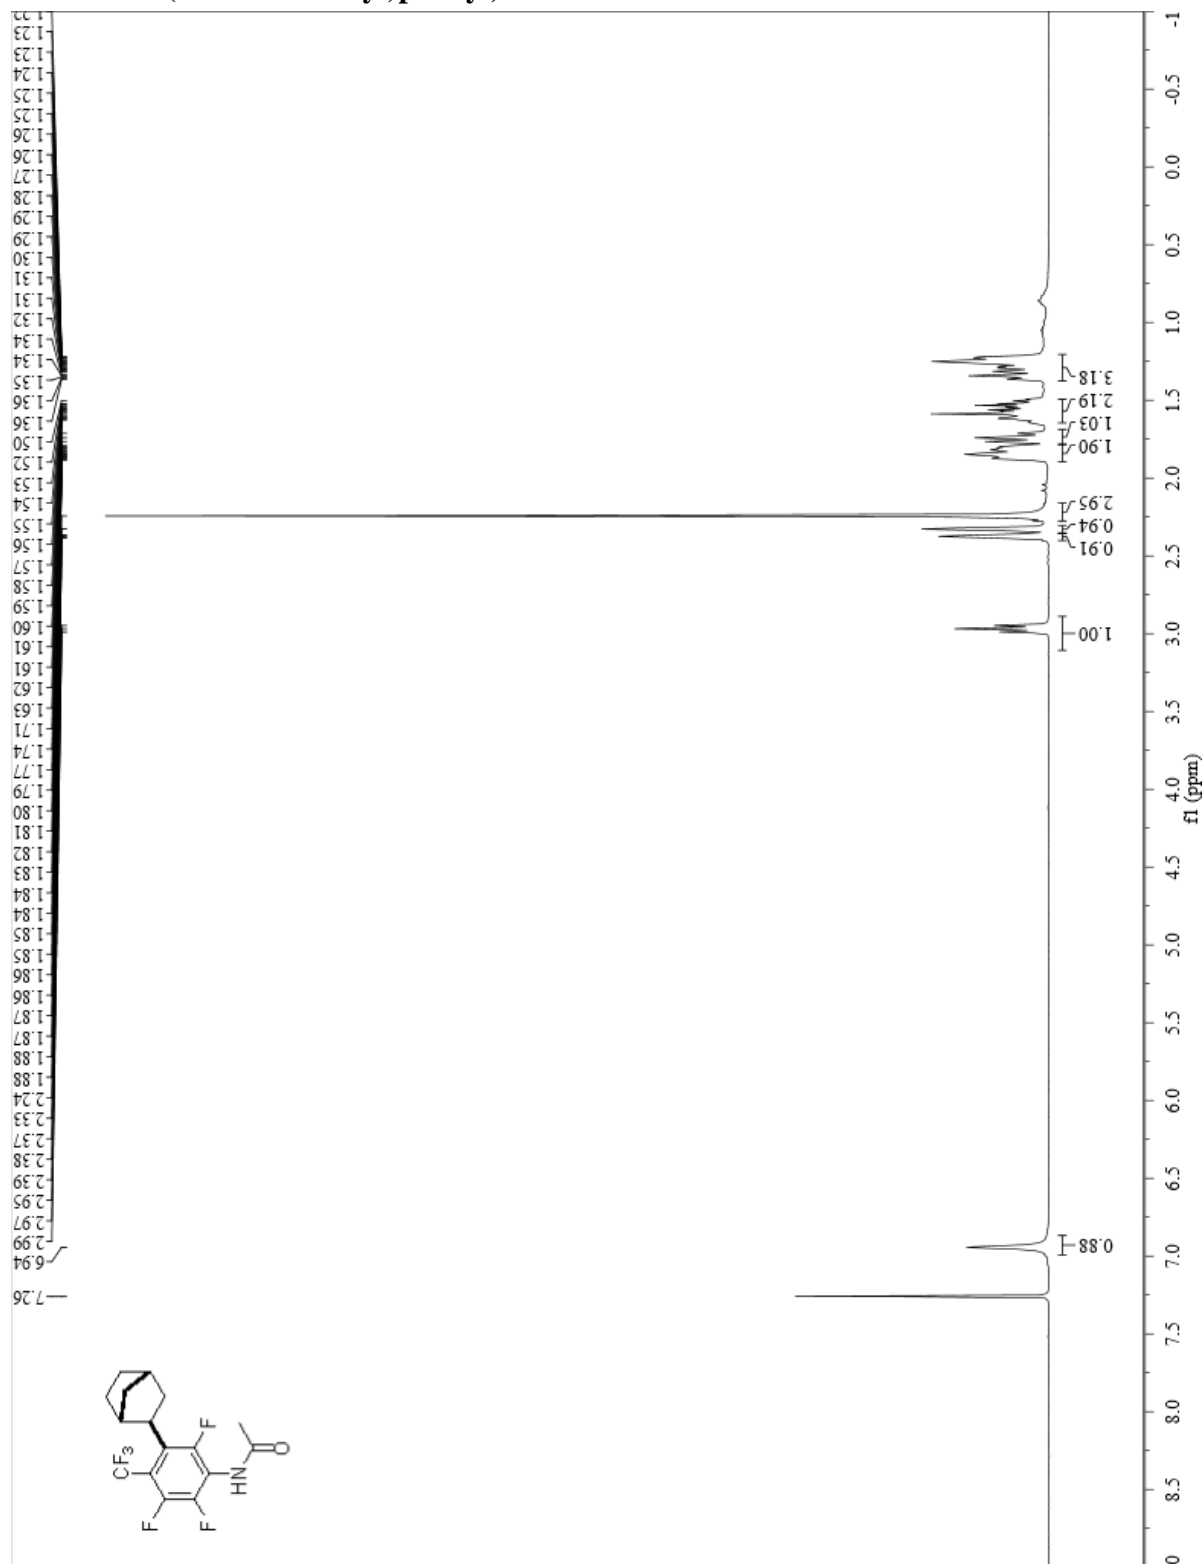

**<sup>13</sup>C{<sup>1</sup>H} NMR (101 MHz, Chloroform-*d*, @ rt) of S-25a N-(3-(bicyclo[2.2.1]heptan-2-yl)-2,5,6-trifluoro-4-(trifluoromethyl)phenyl)acetamide**

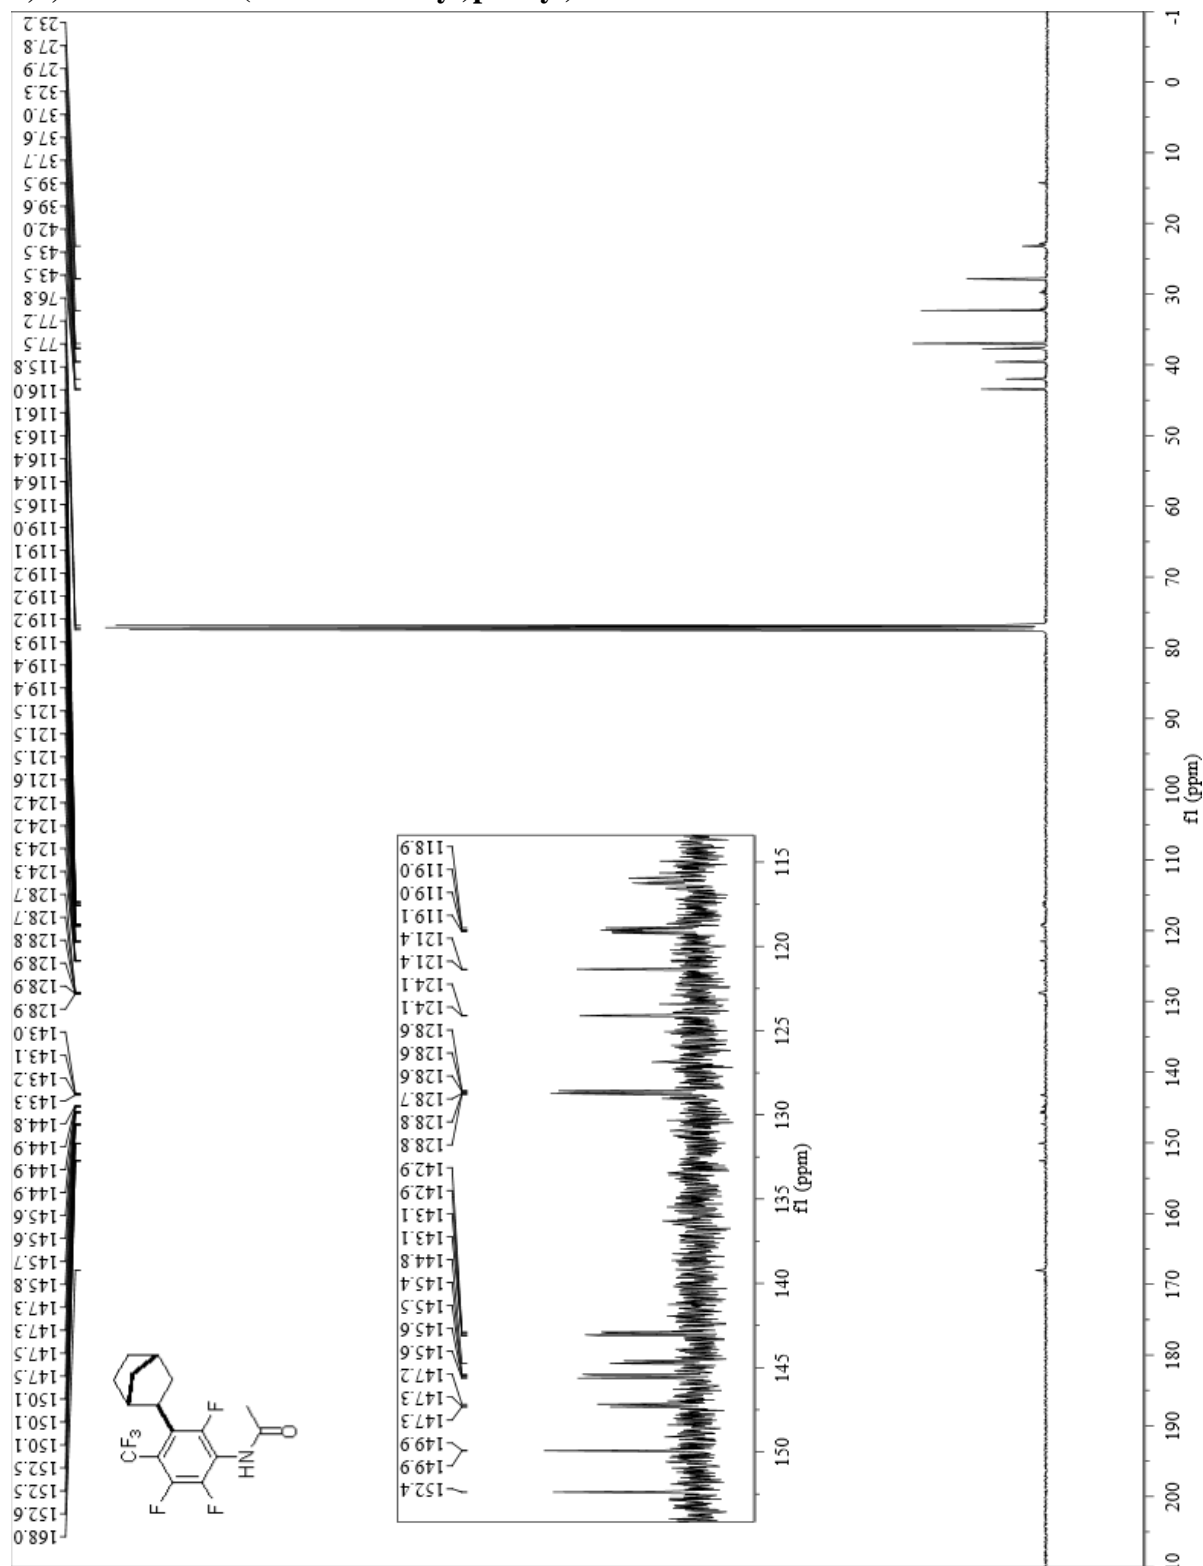

# GC and MS of S-25a N-(3-(bicyclo[2.2.1]heptan-2-yl)-2,5,6-trifluoro-4-(trifluoromethyl)phenyl)acetamide

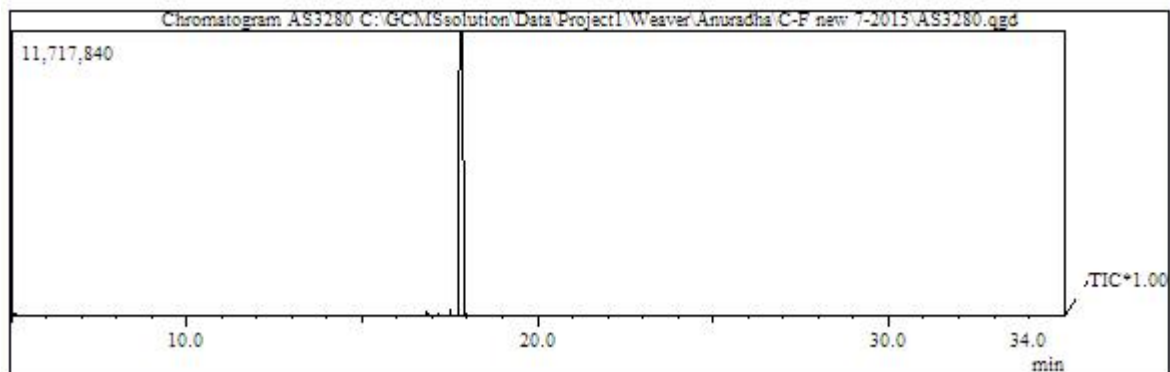

Spectrum

Line#1 R.Time:17.8(Scan#:1534)  
MassPeaks:256  
RawMode:Single 17.8(1534) BasePeak:43(1883191)  
BGMode:None

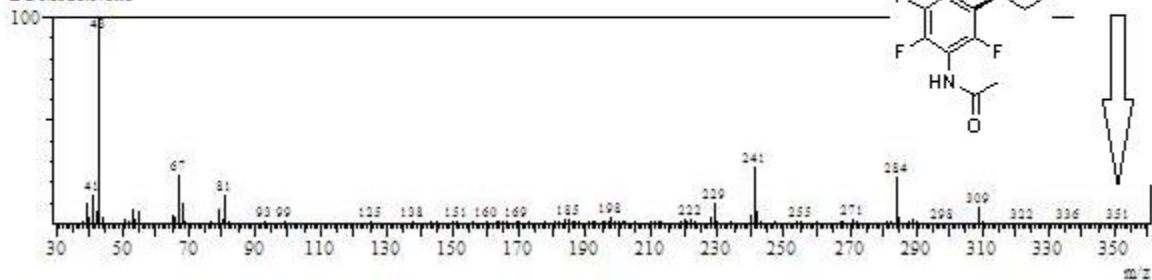

**<sup>19</sup>F NMR (376 MHz, Chloroform-*d*, @ rt) of S-26a methyl 2-(bicyclo[2.2.1]heptan-2-yl)-4-(2-((2-ethoxy-2-oxoethyl)amino)-2-oxoethyl)-3,5,6-trifluorobenzoate**

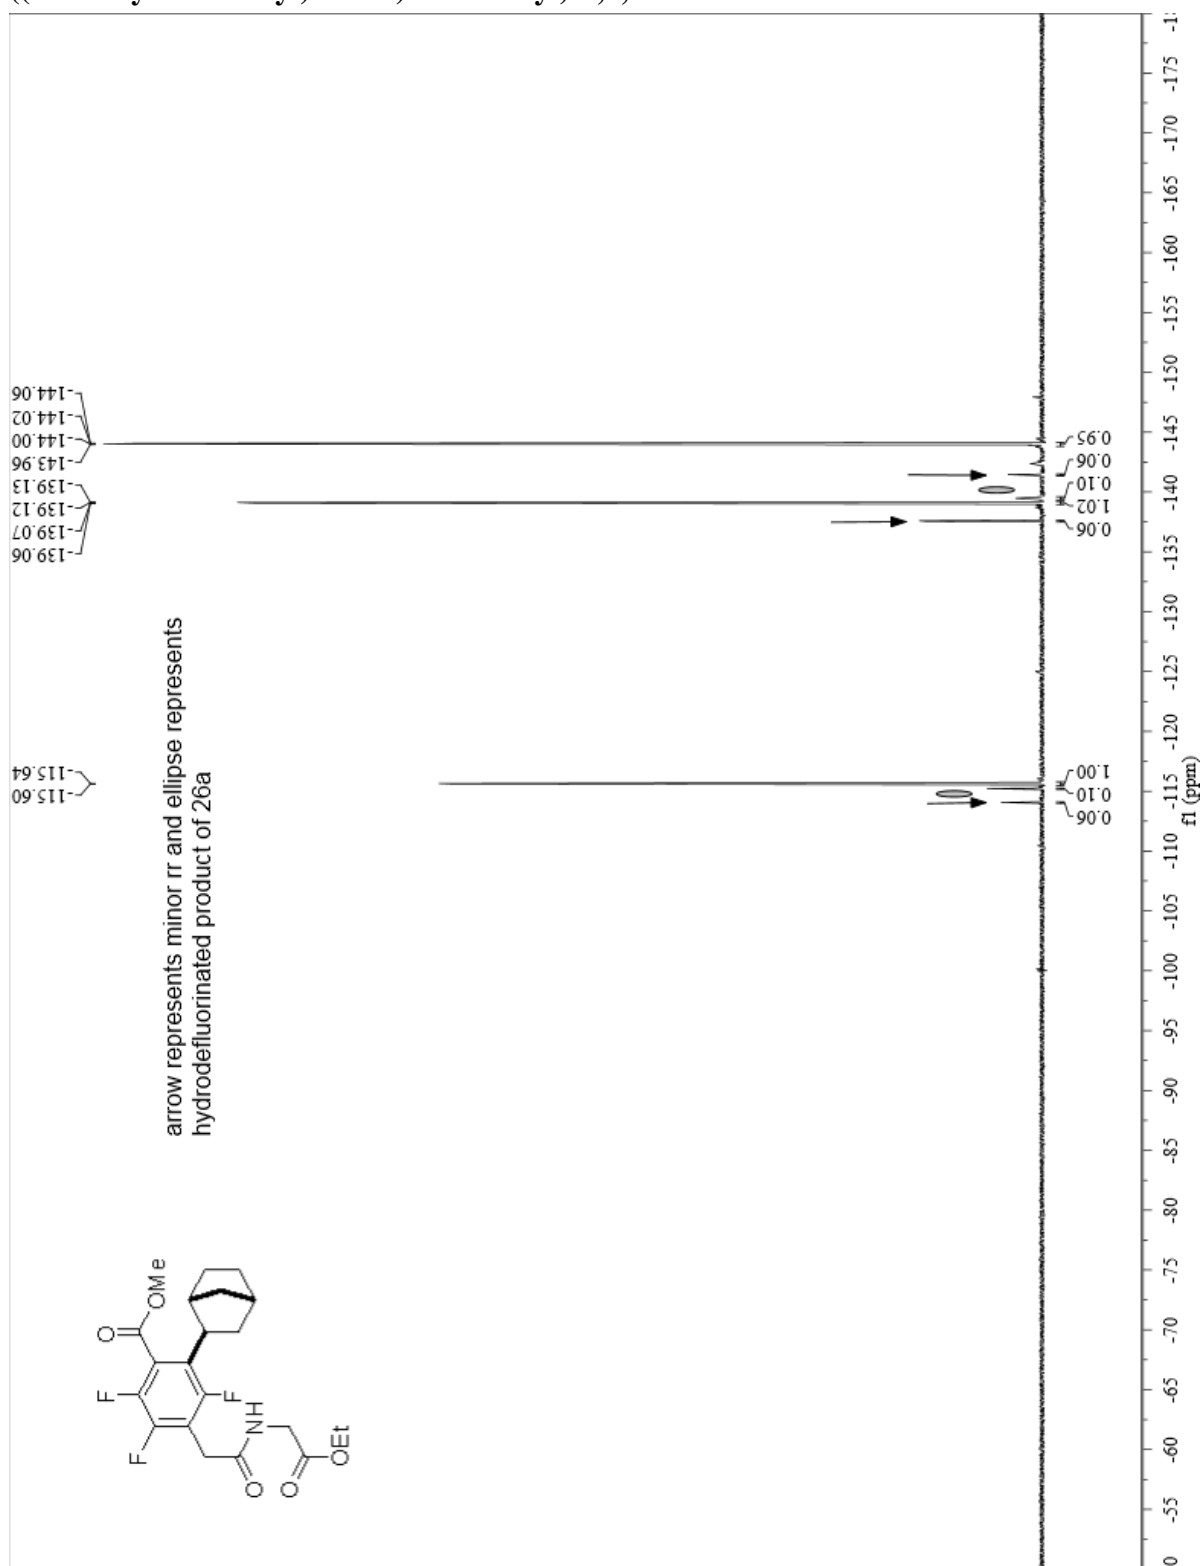

**<sup>1</sup>H NMR (400 MHz, Chloroform-*d*, @ rt) of S-26a methyl 2-(bicyclo[2.2.1]heptan-2-yl)-4-((2-ethoxy-2-oxoethyl)amino)-2-oxoethyl)-3,5,6-trifluorobenzoate**

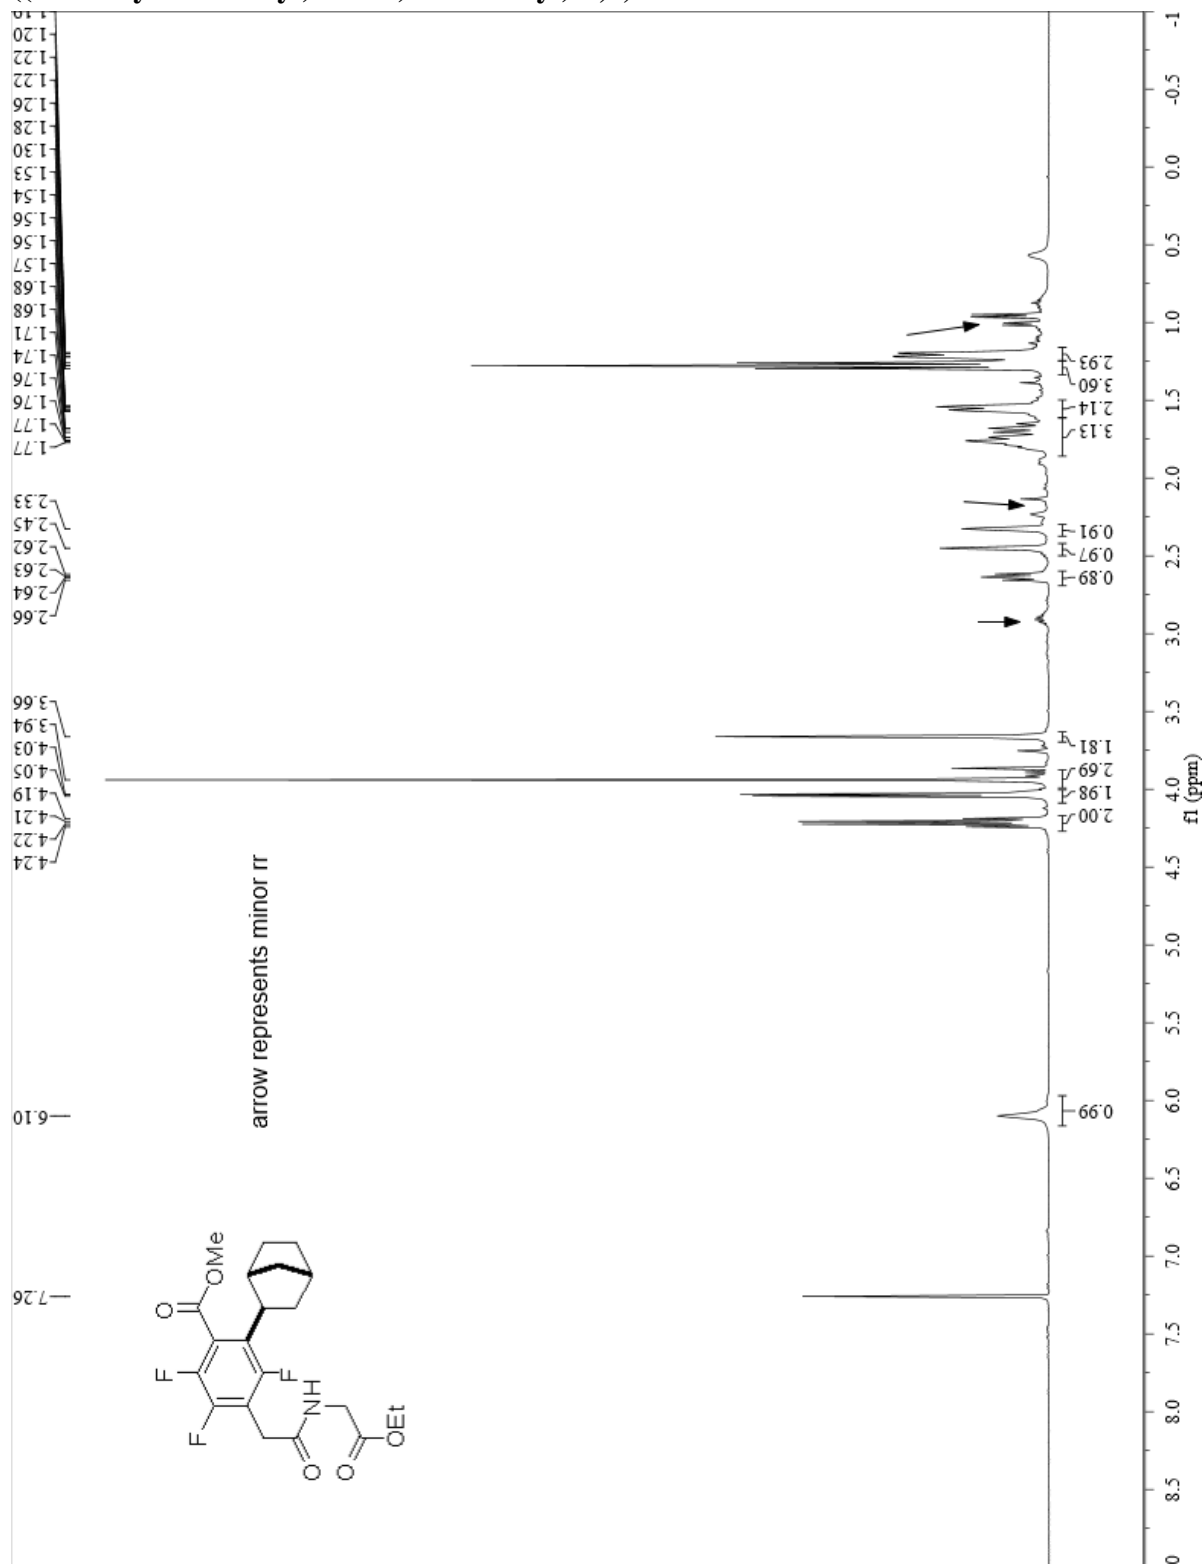

**$^{13}\text{C}\{^1\text{H}\}$  NMR (101 MHz, Chloroform-*d*, @ rt) of S-26a methyl 2-(bicyclo[2.2.1]heptan-2-yl)-4-(2-((2-ethoxy-2-oxoethyl)amino)-2-oxoethyl)-3,5,6-trifluorobenzoate**

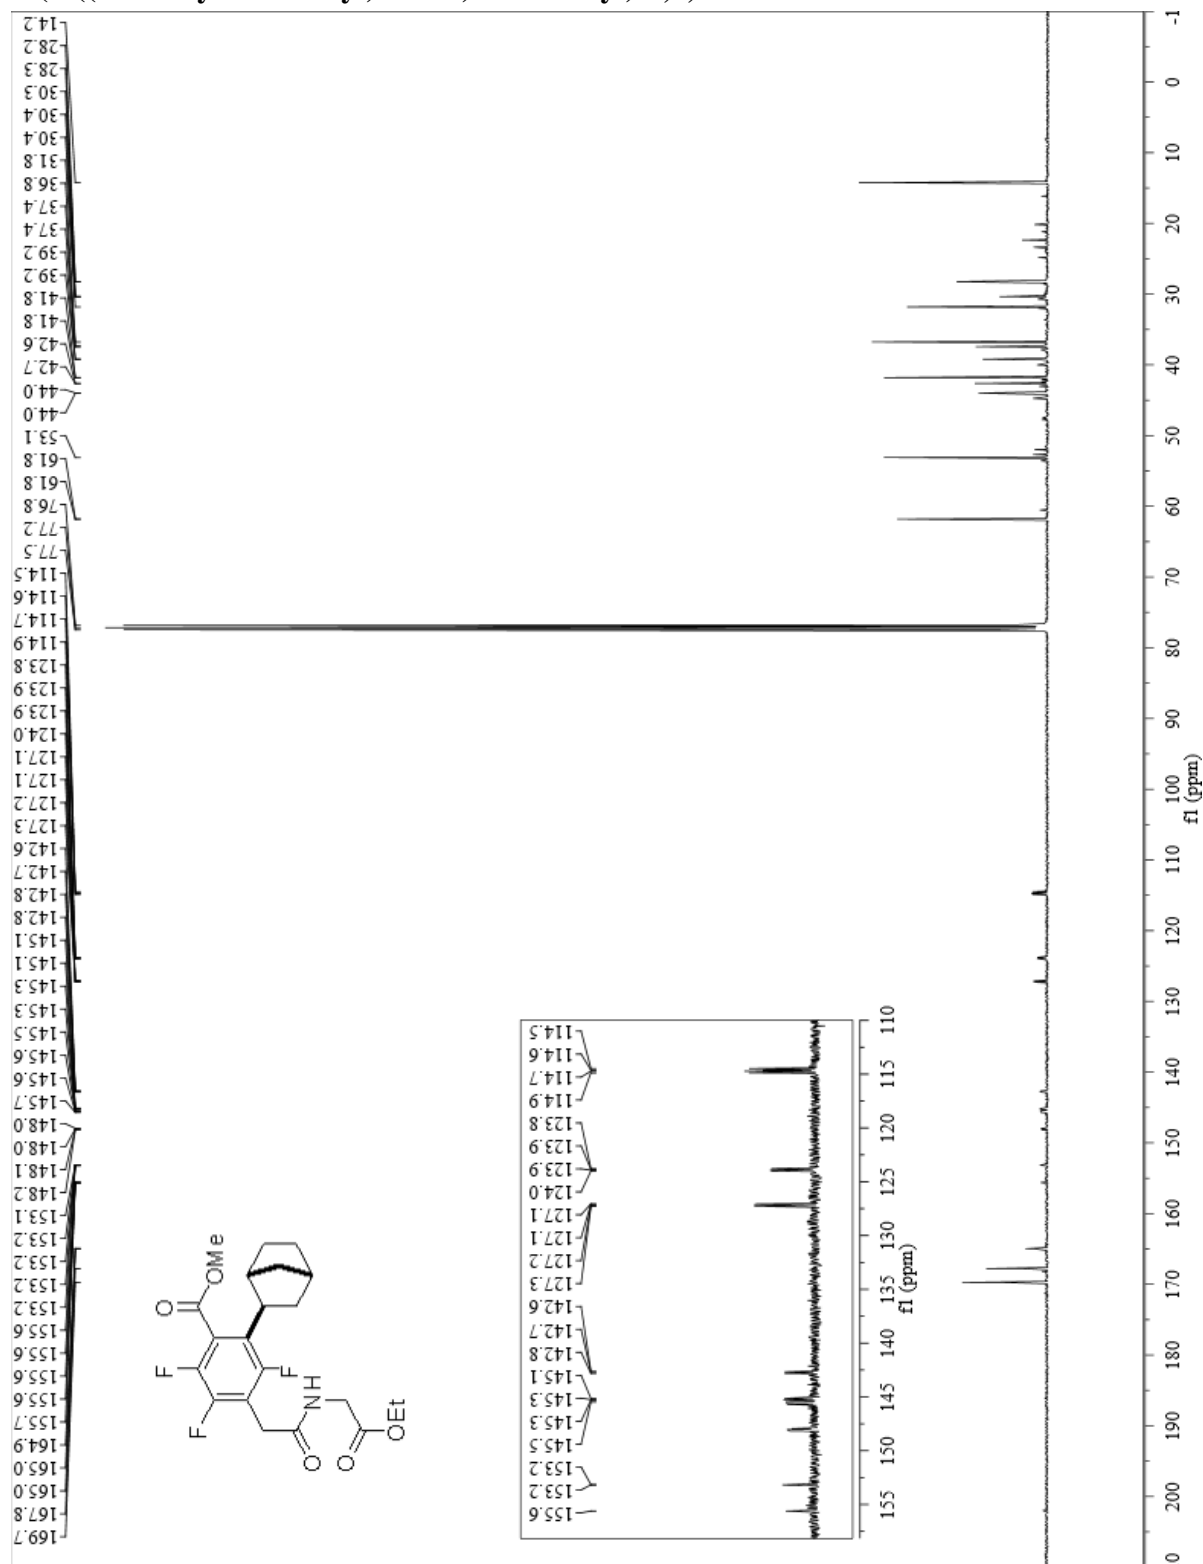

**GC and MS of S-26a methyl 2-(bicyclo[2.2.1]heptan-2-yl)-4-(2-((2-ethoxy-2-oxoethyl)amino)-2-oxoethyl)-3,5,6-trifluorobenzoate**

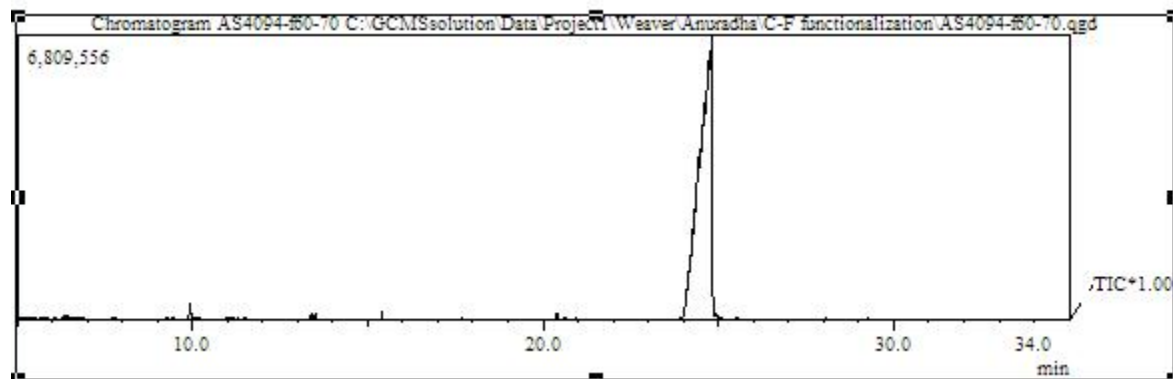

Spectrum

Line#: 1 R.Time: 24.8(Scan#: 2378)  
 MassPeaks: 305  
 RawMode: Single 24.8(2378) BasePeak: 104(593910)  
 BG Mode: None

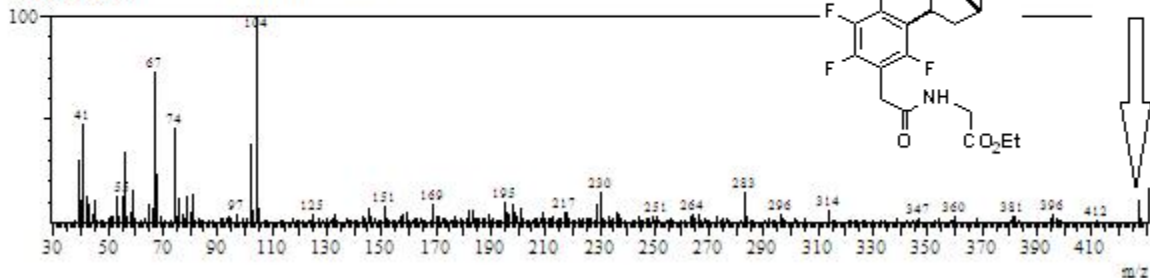

**<sup>19</sup>F NMR (376 MHz, Chloroform-*d*, @ rt) of S-27a ethyl (2-(2-(bicyclo[2.2.1]heptan-2-yl)-3,5,6-trifluoropyridin-4-yl)acetyl)glycinate**

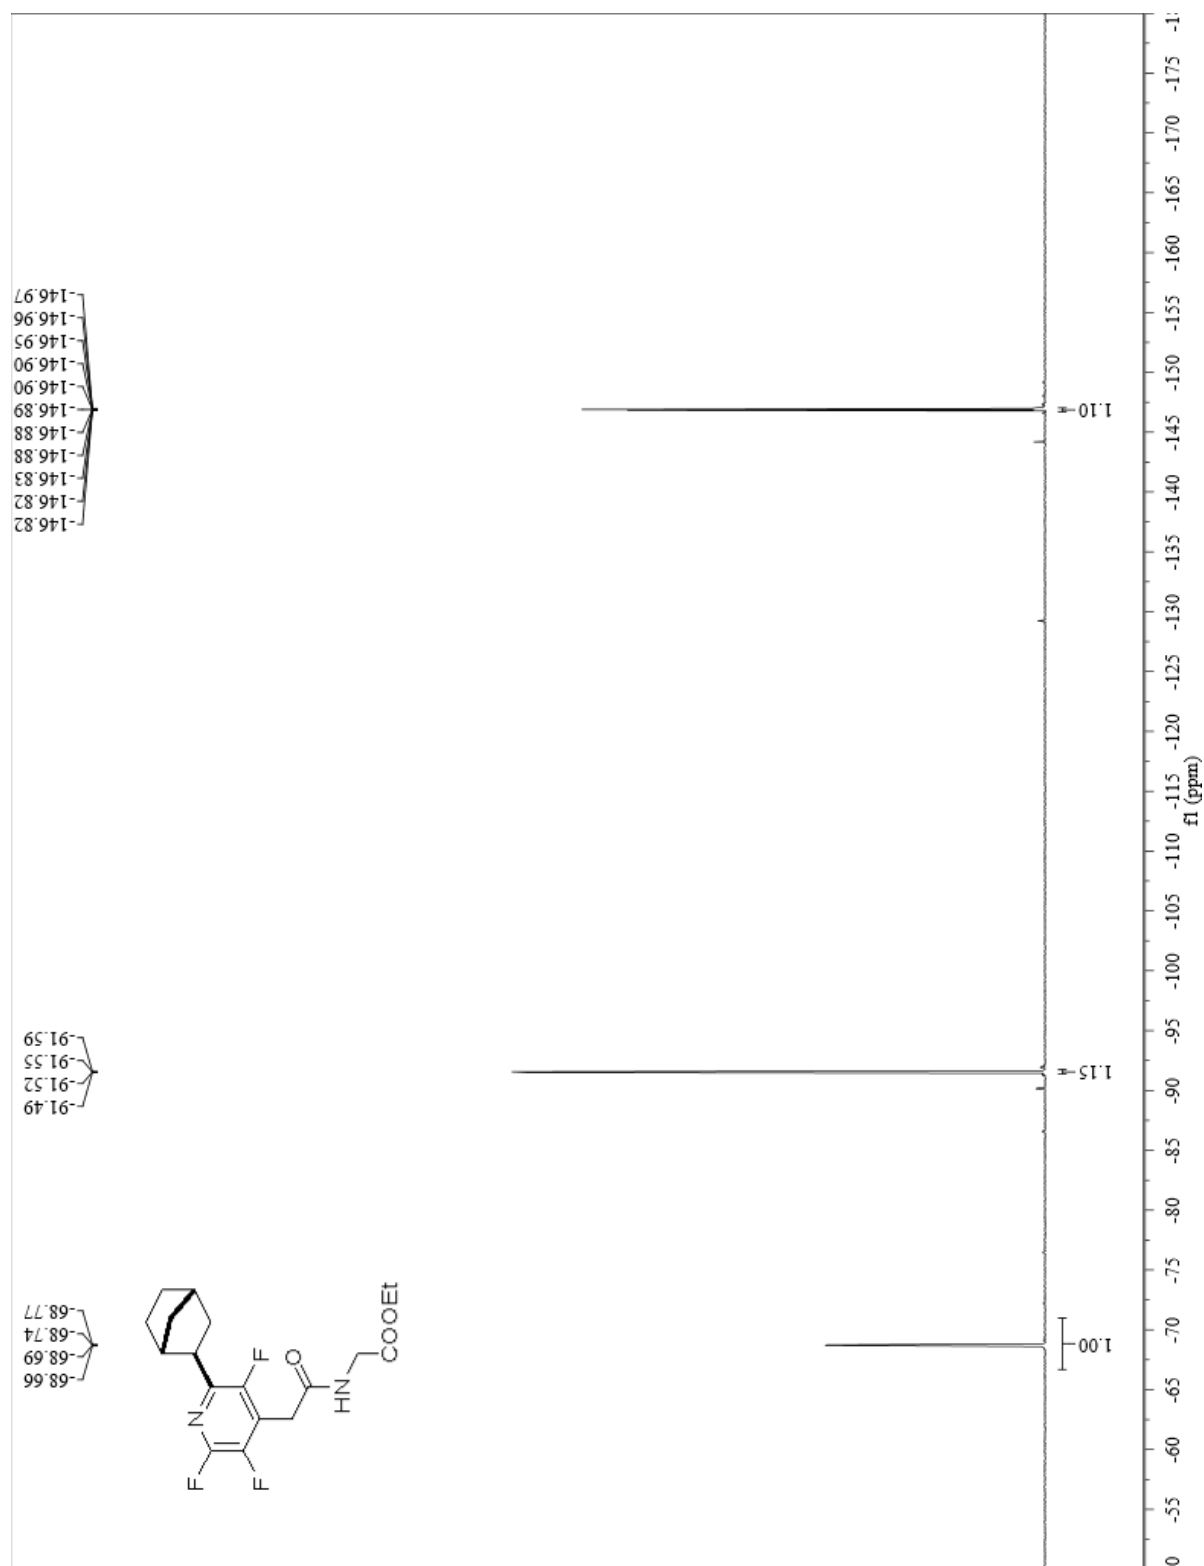



<sup>1</sup>H NMR (400 MHz, Chloroform-d, @ rt) of S-27a ethyl (2-(2-(bicyclo[2.2.1]heptan-2-yl)-3,5,6-trifluoropyridin-4-yl)acetyl)glycinate

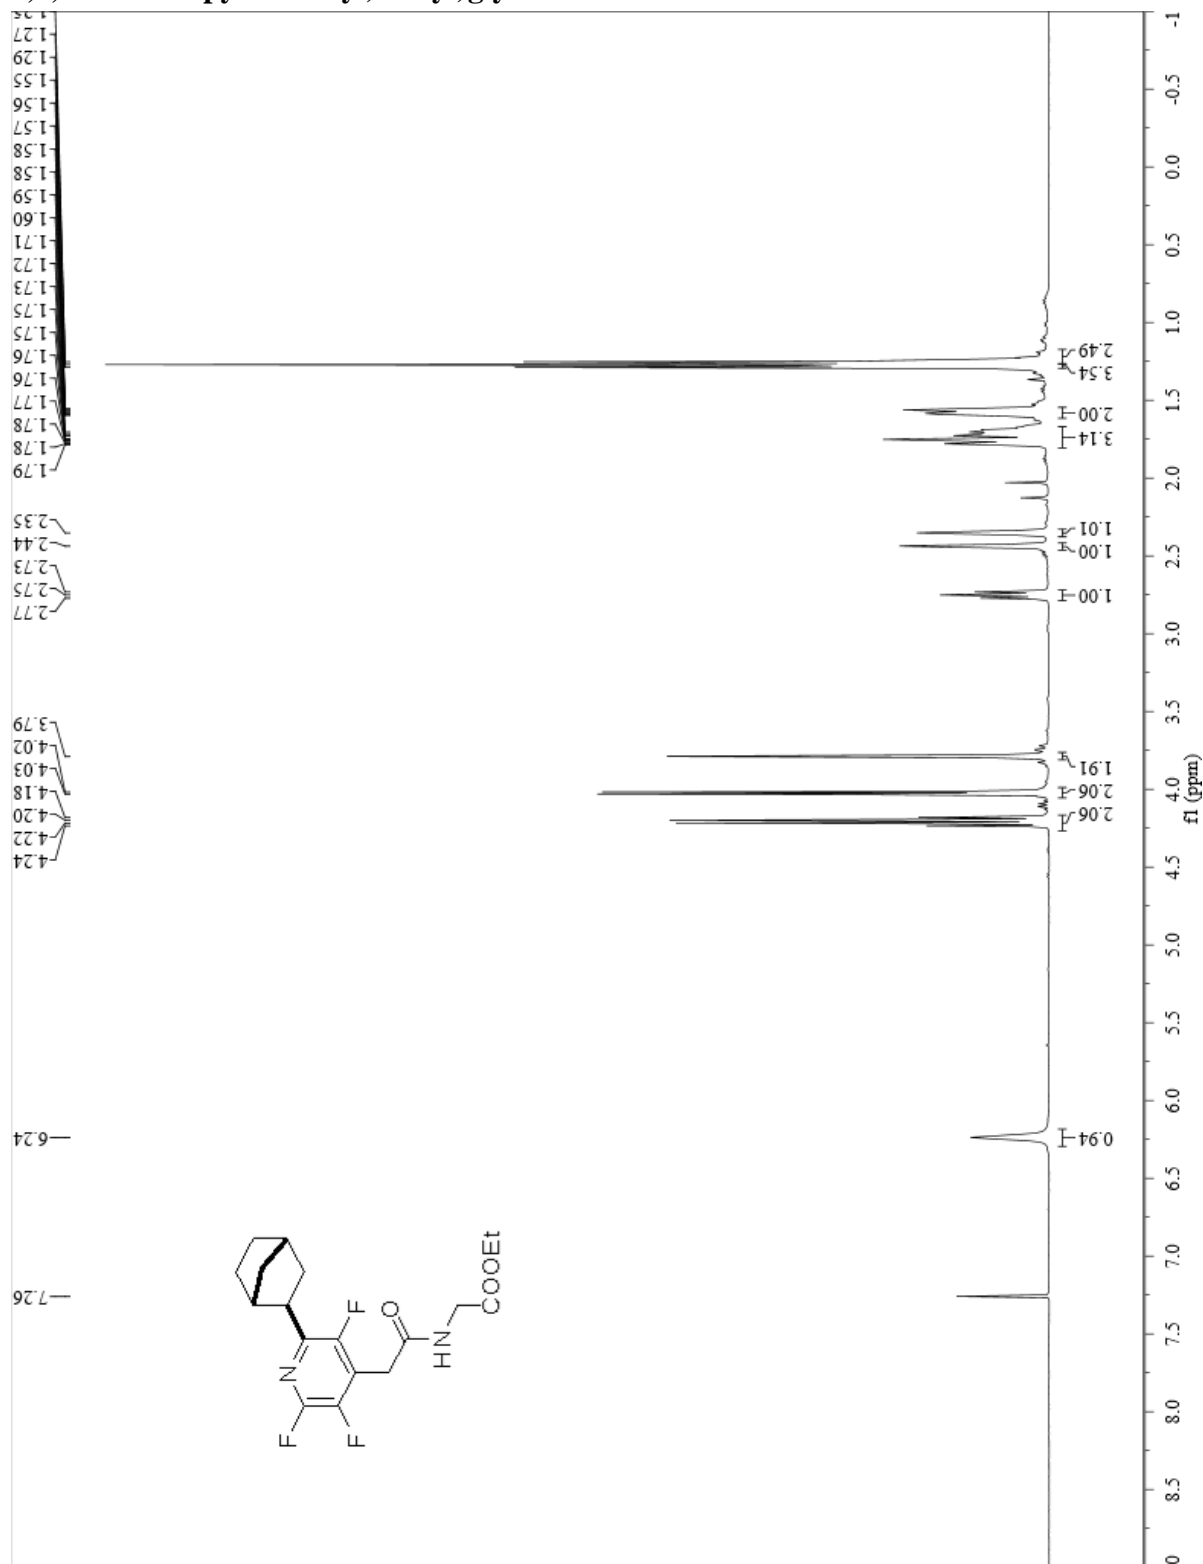

**$^{13}\text{C}\{^1\text{H}\}$  NMR (101 MHz, Chloroform-*d*, @ rt) of S-27a ethyl (2-(2-(bicyclo[2.2.1]heptan-2-yl)-3,5,6-trifluoropyridin-4-yl)acetyl)glycinate**

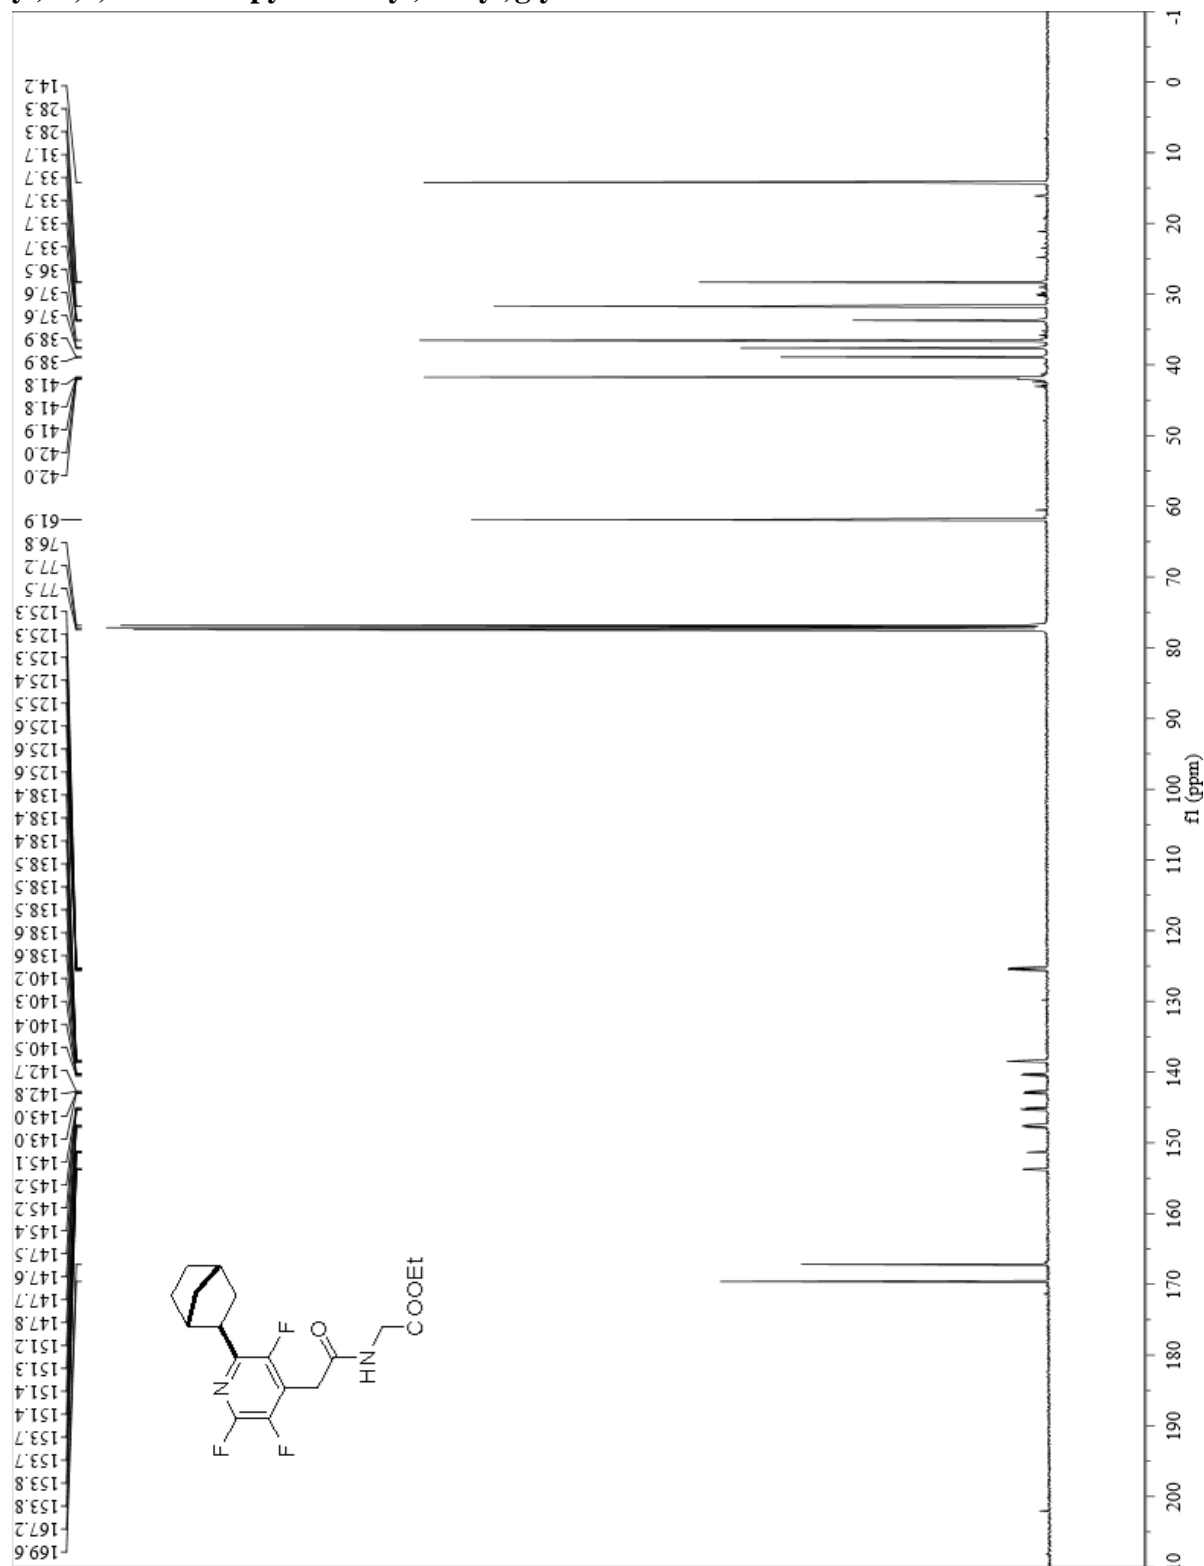

# GC and MS of S-27a ethyl (2-(2-(bicyclo[2.2.1]heptan-2-yl)-3,5,6-trifluoropyridin-4-yl)acetyl)glycinate

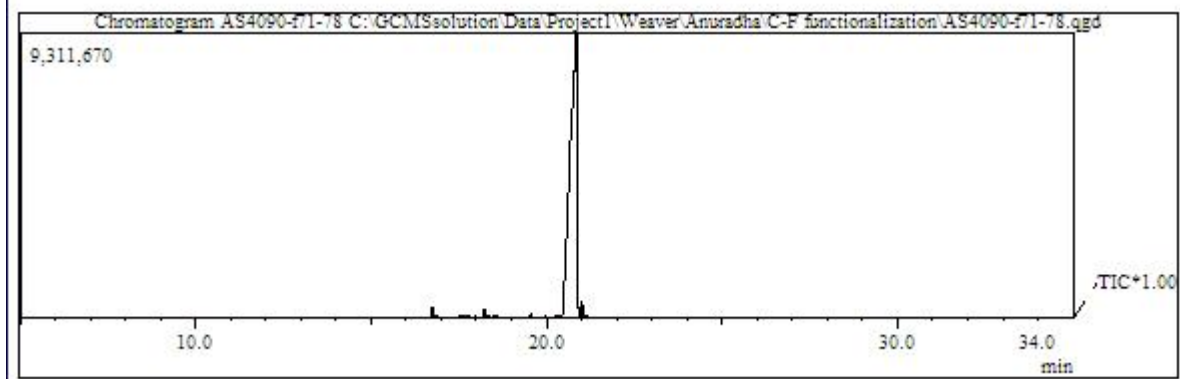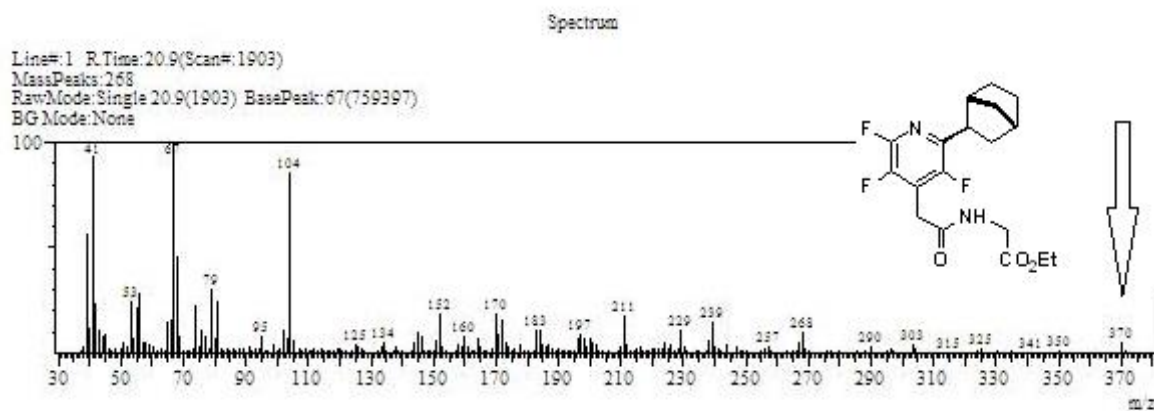

**<sup>19</sup>F NMR (376 MHz, Chloroform-*d*, @ rt) of S-28a dimethyl 5-(4-(2-((2-ethoxy-2-oxoethyl)amino)-2-oxoethyl)-3,5,6-trifluoropyridin-2-yl)-7-oxabicyclo[2.2.1]heptane-2,3-dicarboxylate**

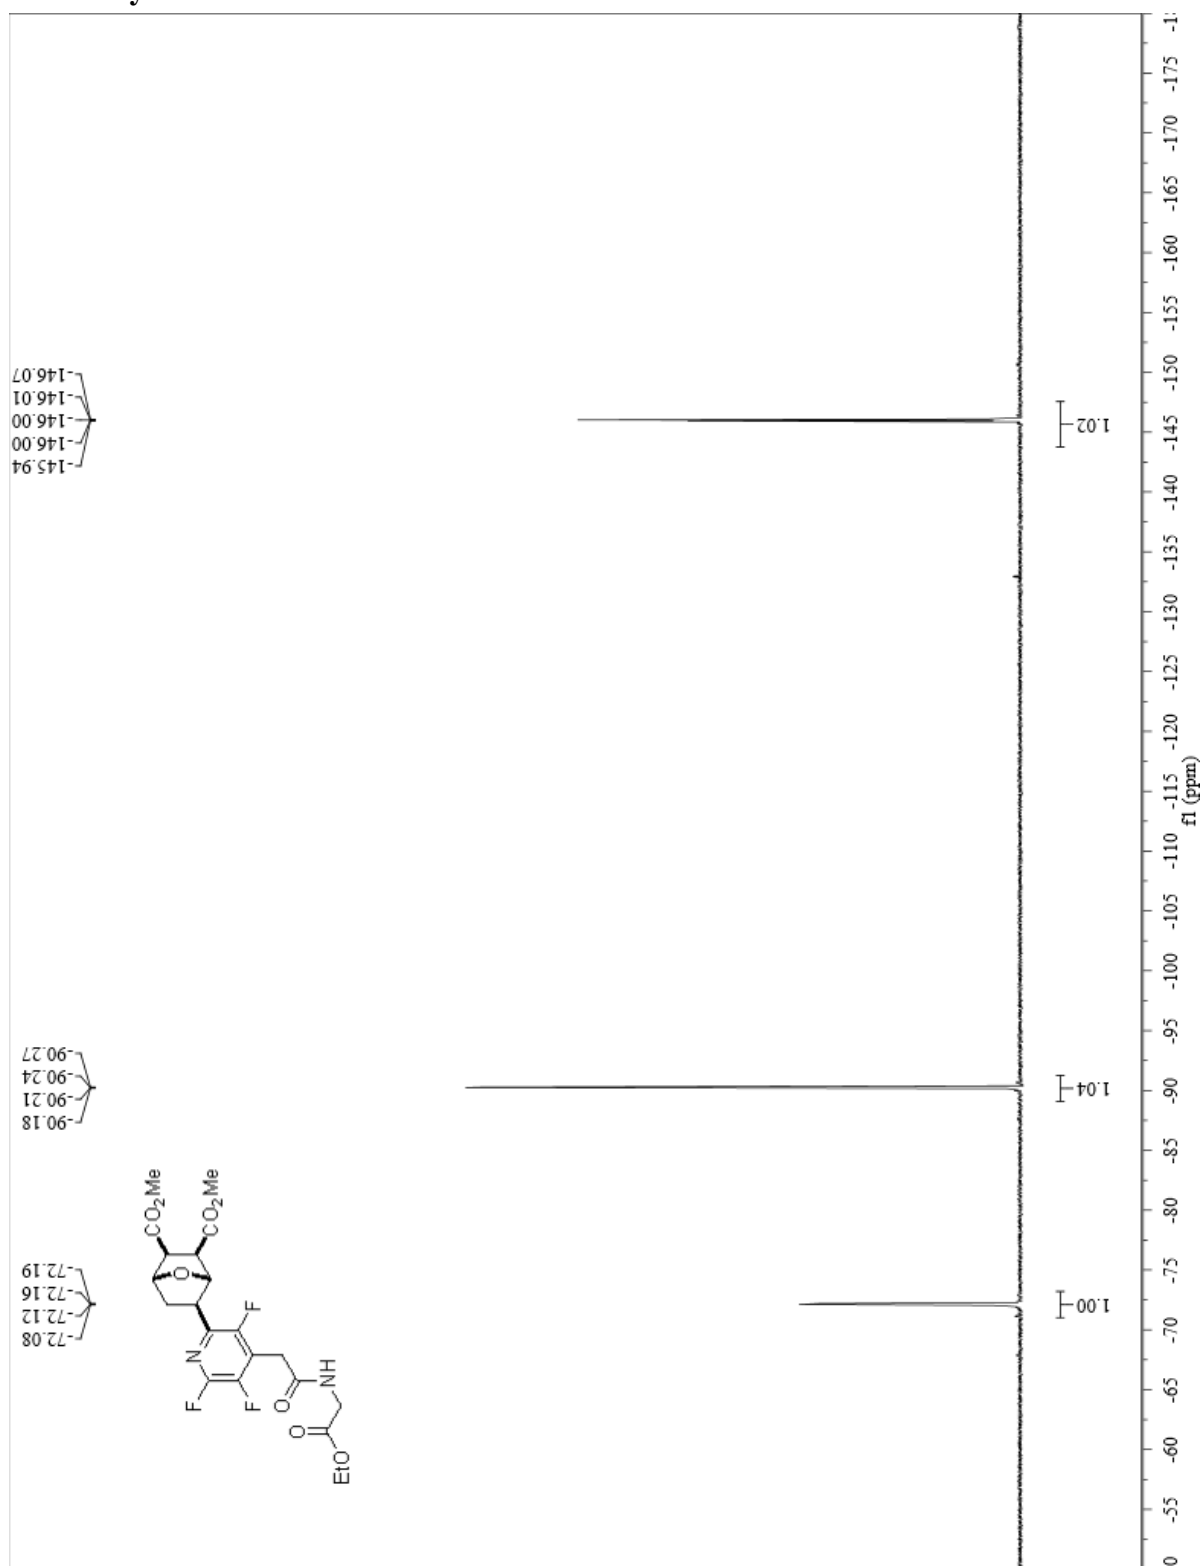

**<sup>1</sup>H NMR (400 MHz, Chloroform-*d*, @ rt) of S-28a dimethyl 5-(4-(2-((2-ethoxy-2-oxoethyl)amino)-2-oxoethyl)-3,5,6-trifluoropyridin-2-yl)-7-oxabicyclo[2.2.1]heptane-2,3-dicarboxylate**

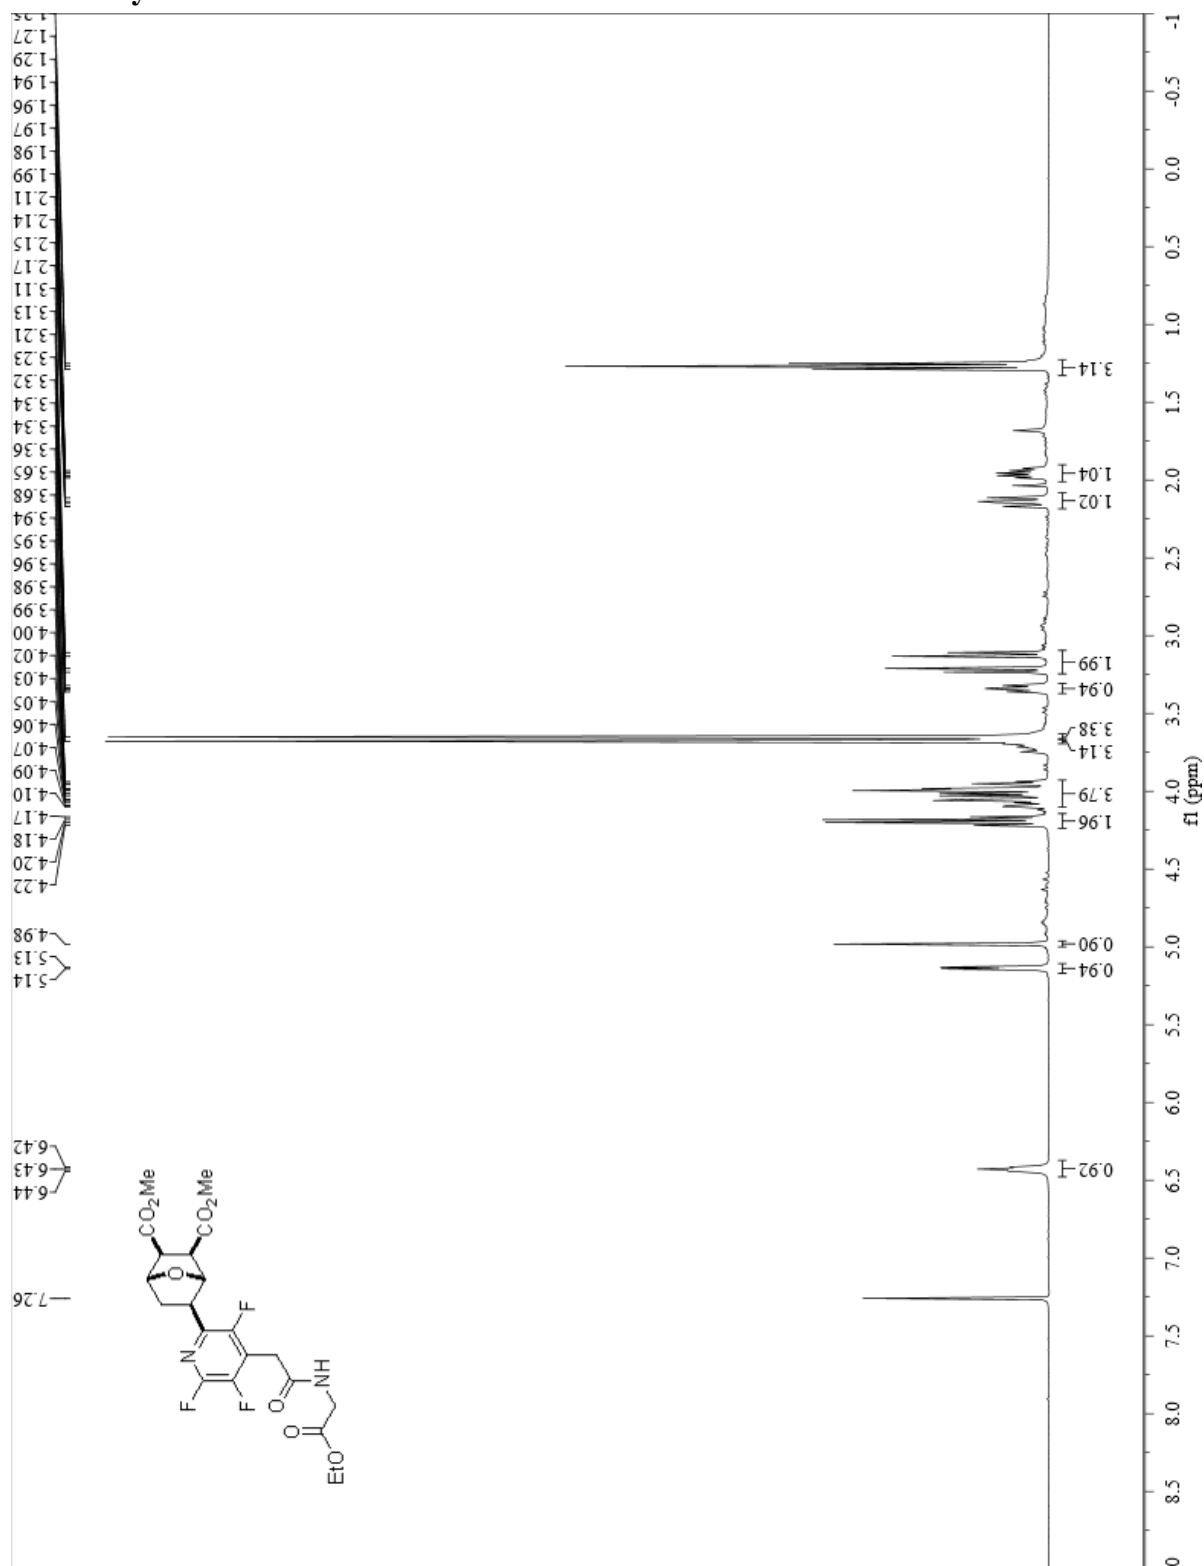

**$^{13}\text{C}\{^1\text{H}\}$  NMR (101 MHz, Chloroform-*d*, @ rt) of S-28a dimethyl 5-(4-(2-((2-ethoxy-2-oxoethyl)amino)-2-oxoethyl)-3,5,6-trifluoropyridin-2-yl)-7-oxabicyclo[2.2.1]heptane-2,3-dicarboxylate**

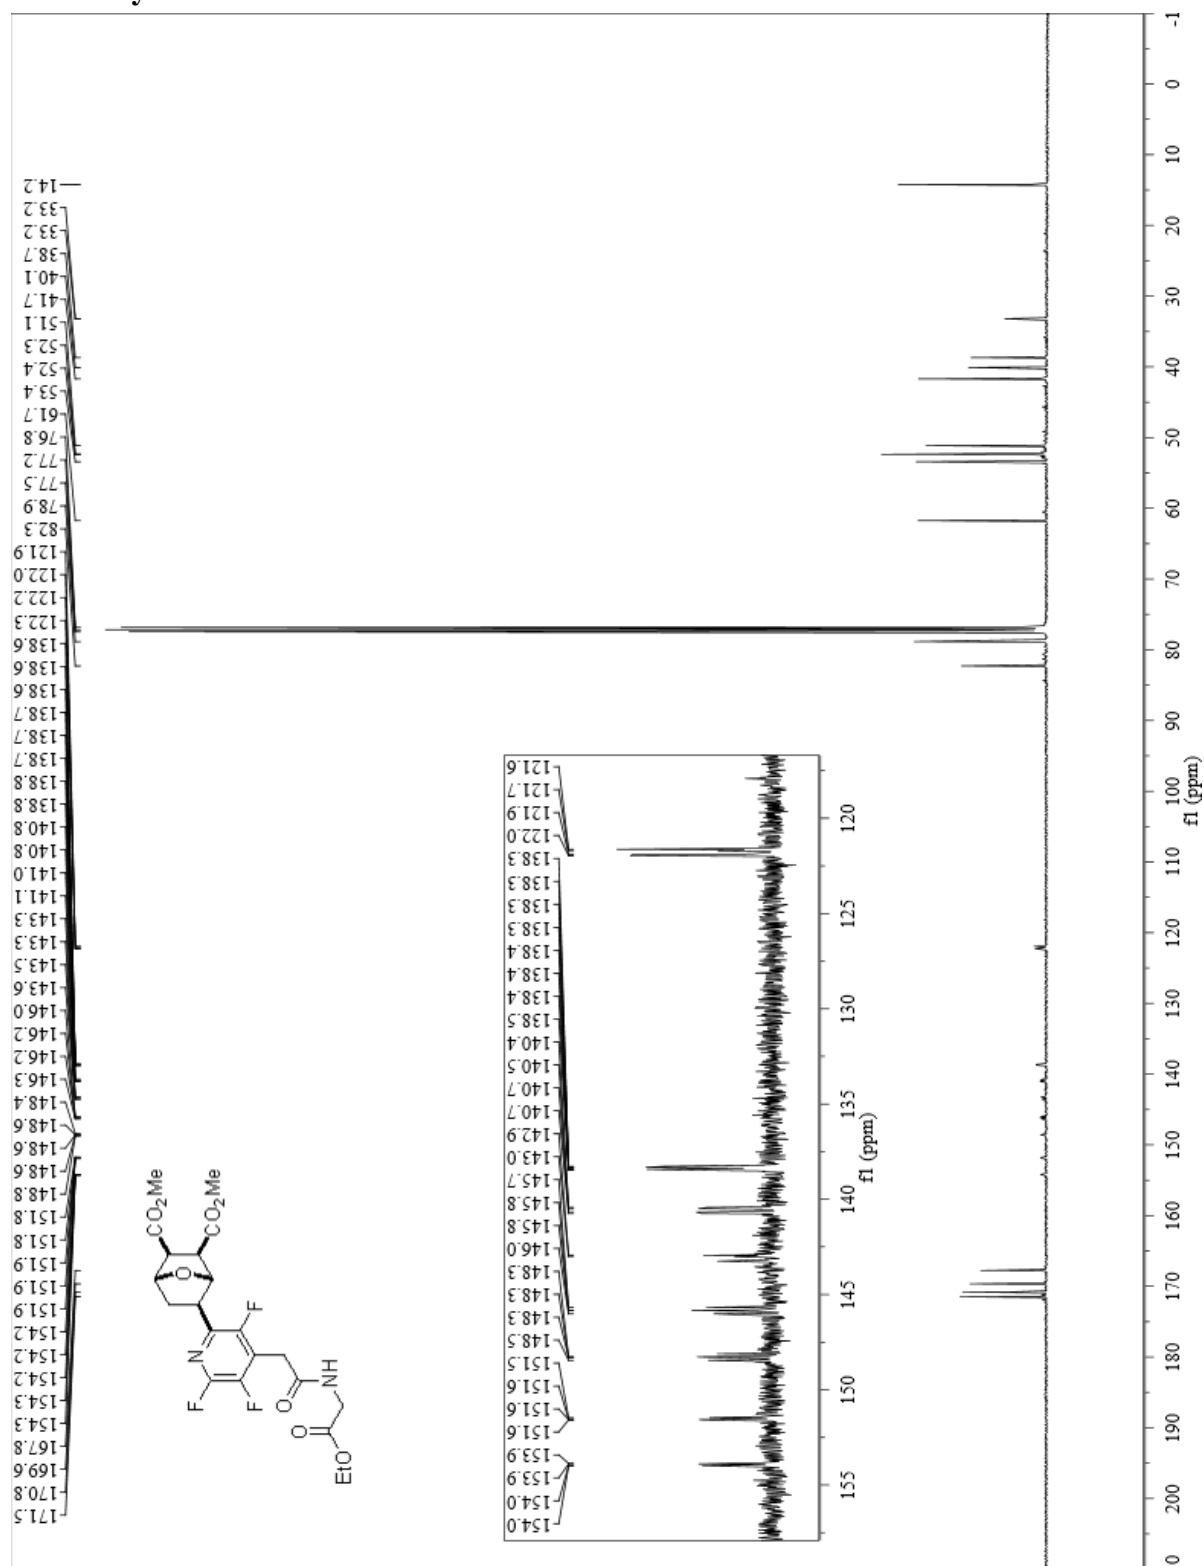

**<sup>19</sup>F NMR (376 MHz, acetone-*d*<sub>6</sub>, @ rt) of S-29a dimethyl 5-(4-(2-((2-ethoxy-2-oxoethyl)amino)-2-oxoethyl)-2,5,6-trifluoropyridin-3-yl)-7-oxabicyclo[2.2.1]heptane-2,3-dicarboxylate**

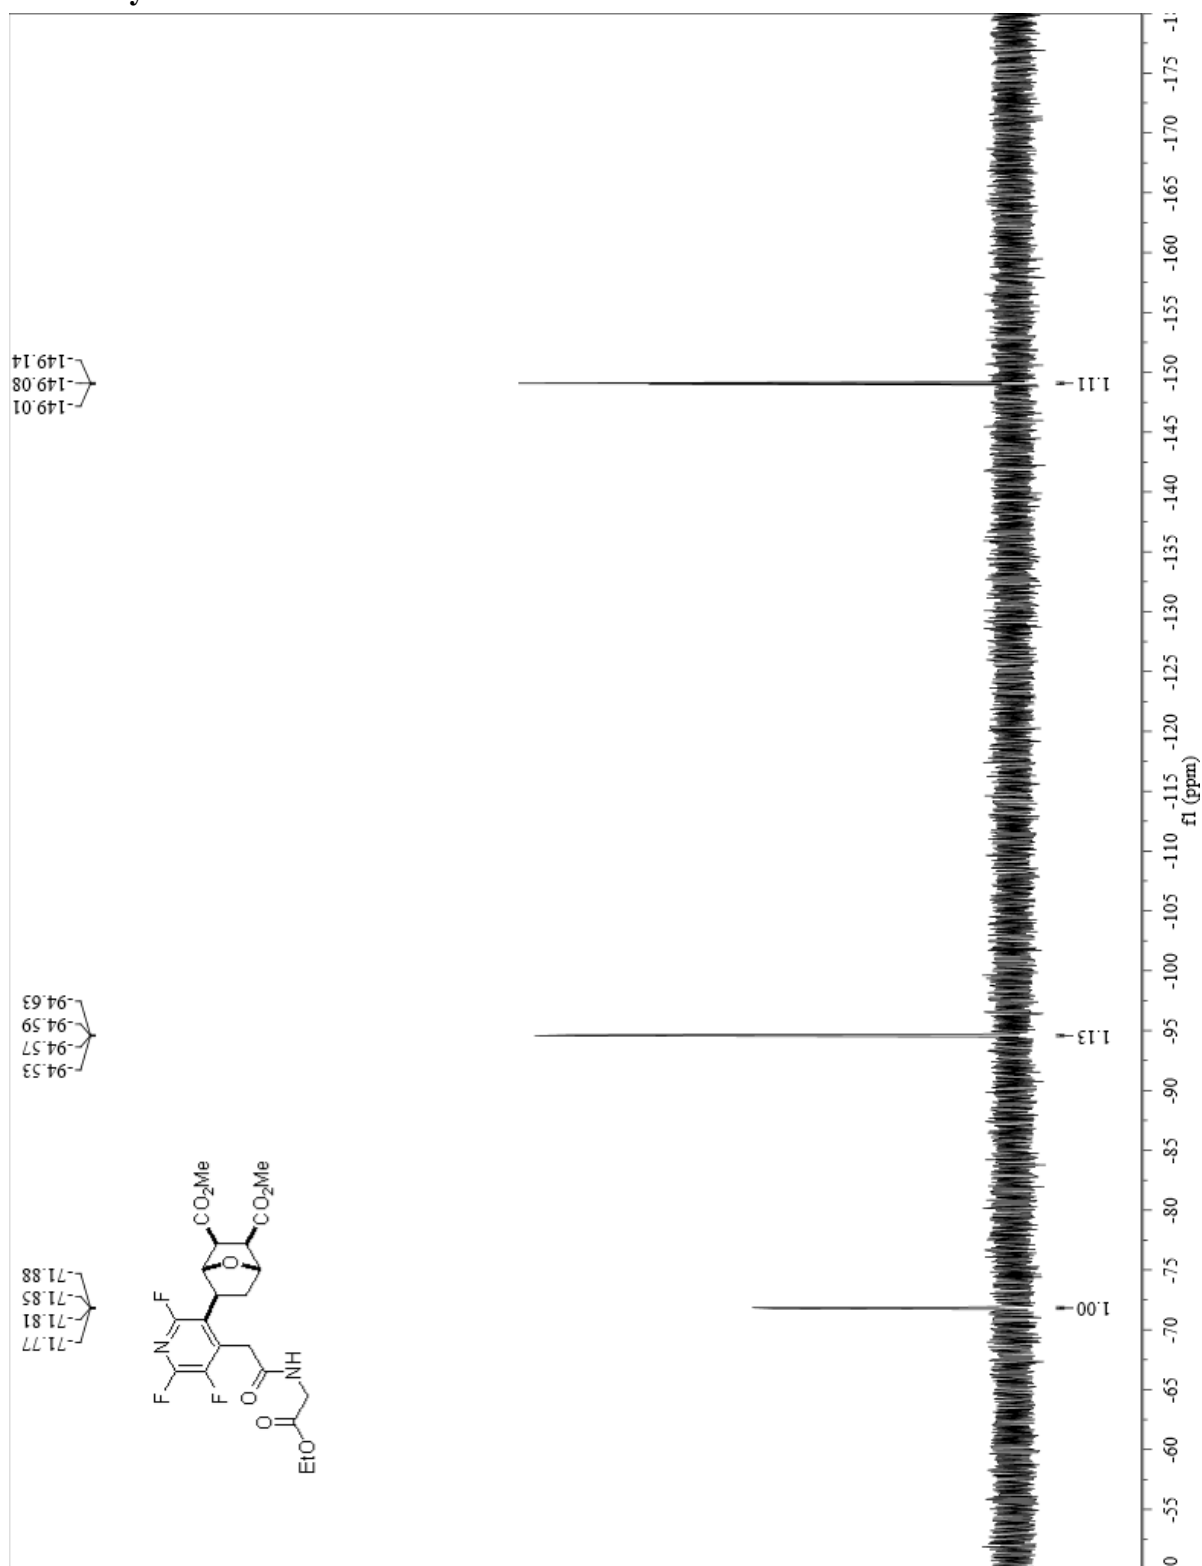

**<sup>1</sup>H NMR (400 MHz, acetone-*d*<sub>6</sub>, @ rt) of S-29a dimethyl 5-(4-(2-((2-ethoxy-2-oxoethyl)amino)-2-oxoethyl)-2,5,6-trifluoropyridin-3-yl)-7-oxabicyclo[2.2.1]heptane-2,3-dicarboxylate**

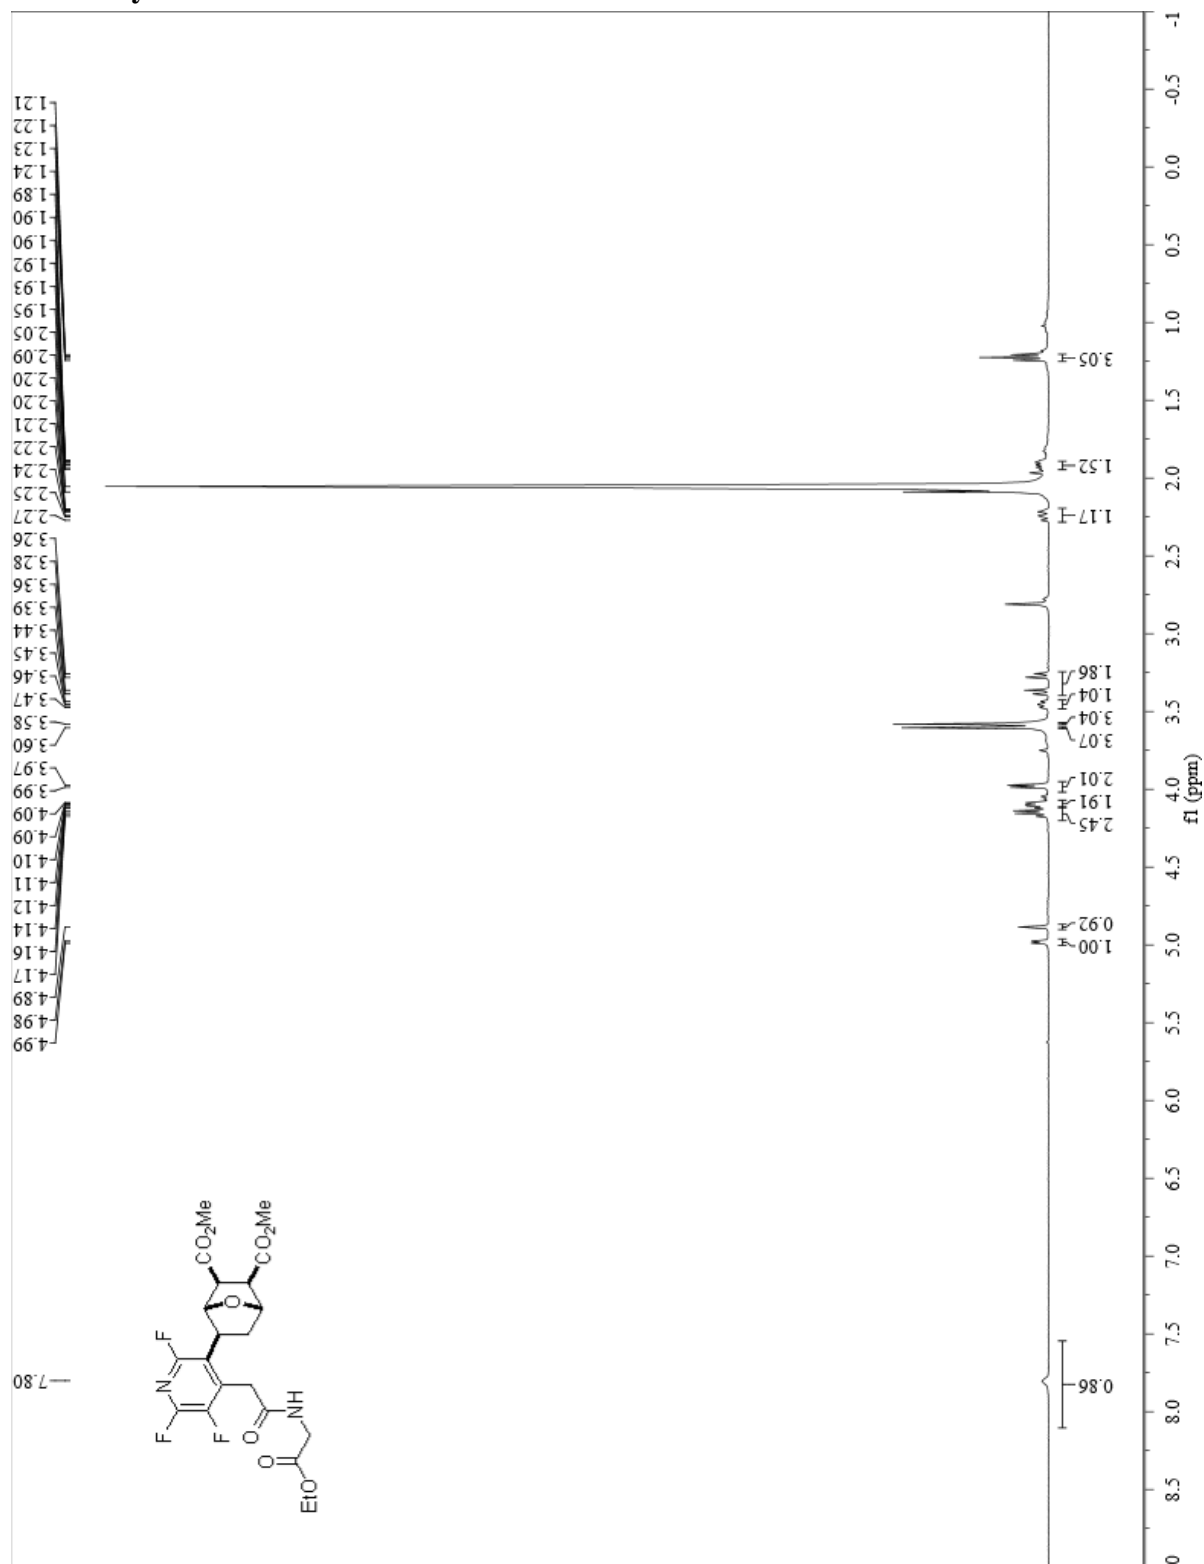



**$^{13}\text{C}\{^1\text{H}\}$  NMR (101 MHz, acetone- $d_6$ , @ rt) of S-29a dimethyl 5-(4-(2-((2-ethoxy-2-oxoethyl)amino)-2-oxoethyl)-2,5,6-trifluoropyridin-3-yl)-7-oxabicyclo[2.2.1]heptane-2,3-dicarboxylate**

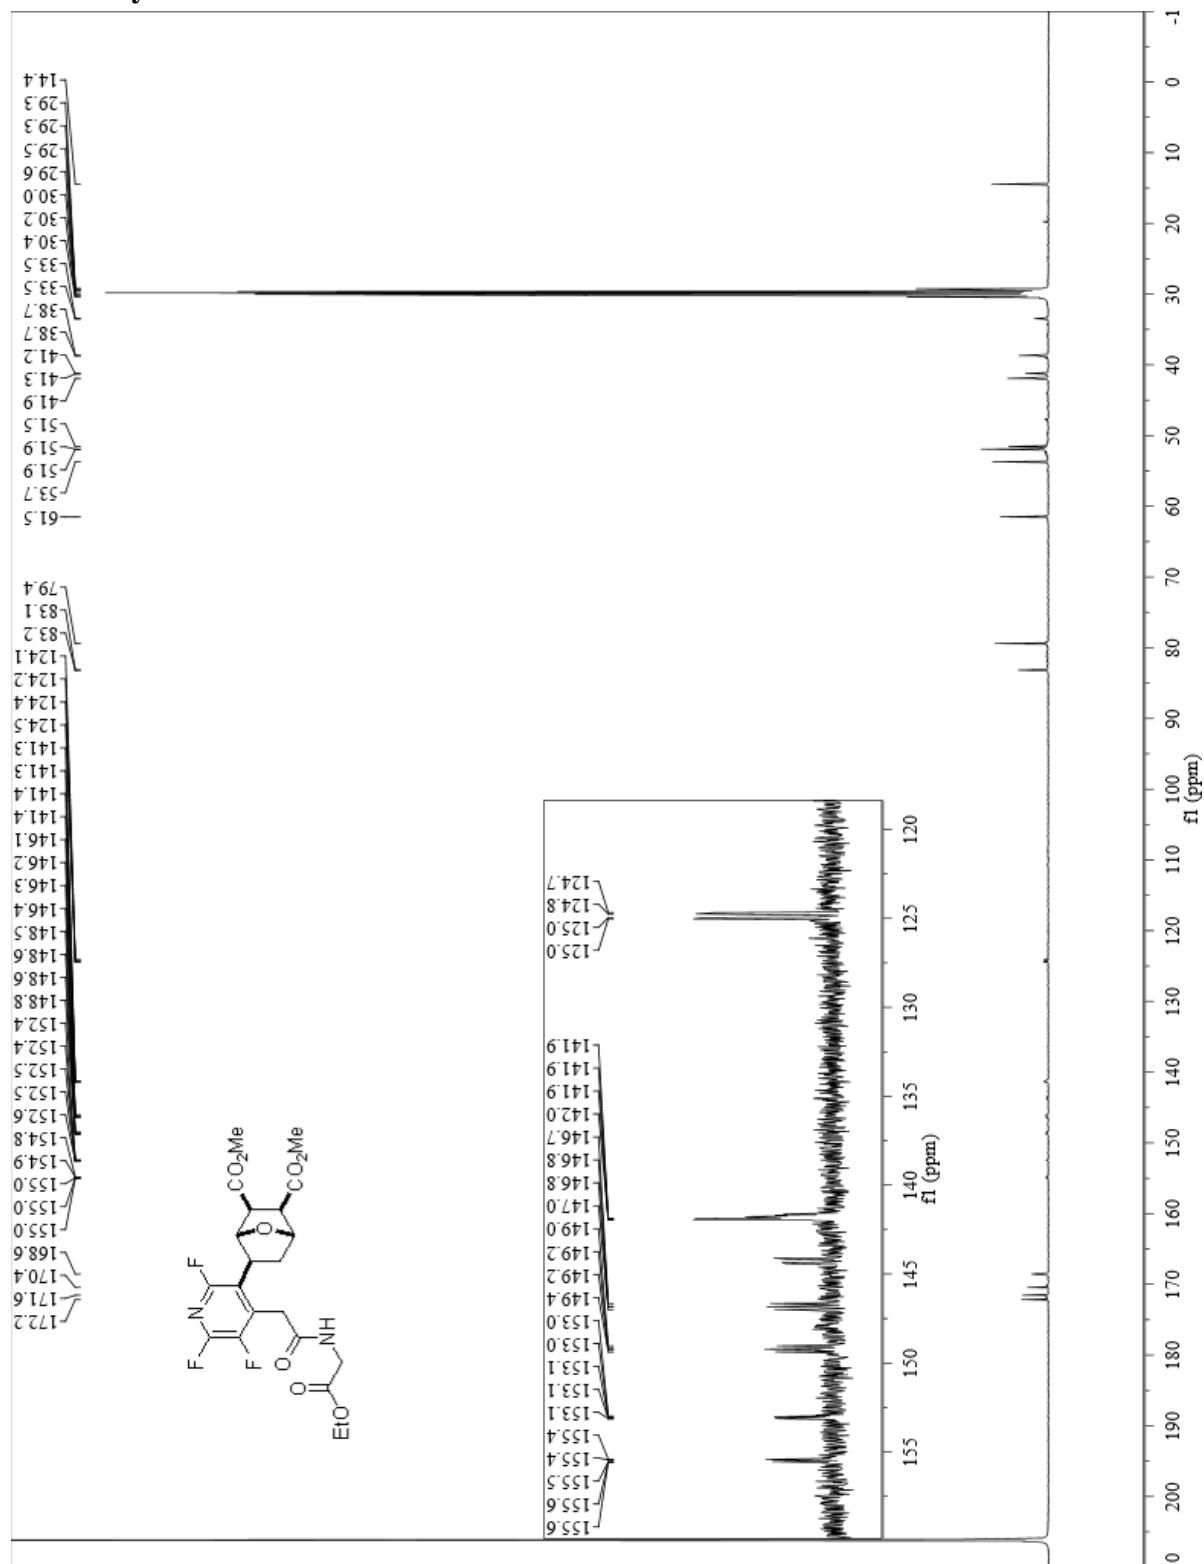

**<sup>19</sup>F NMR (376 MHz, Chloroform-*d*, @ rt) of S-30a (1'*R*,3'*S*)-methyl 2,3,5,6-tetrafluoro-3'-isopropyl-6'-methyl-1',2',3',4'-tetrahydro-[1,1'-biphenyl]-4-carboxylate**

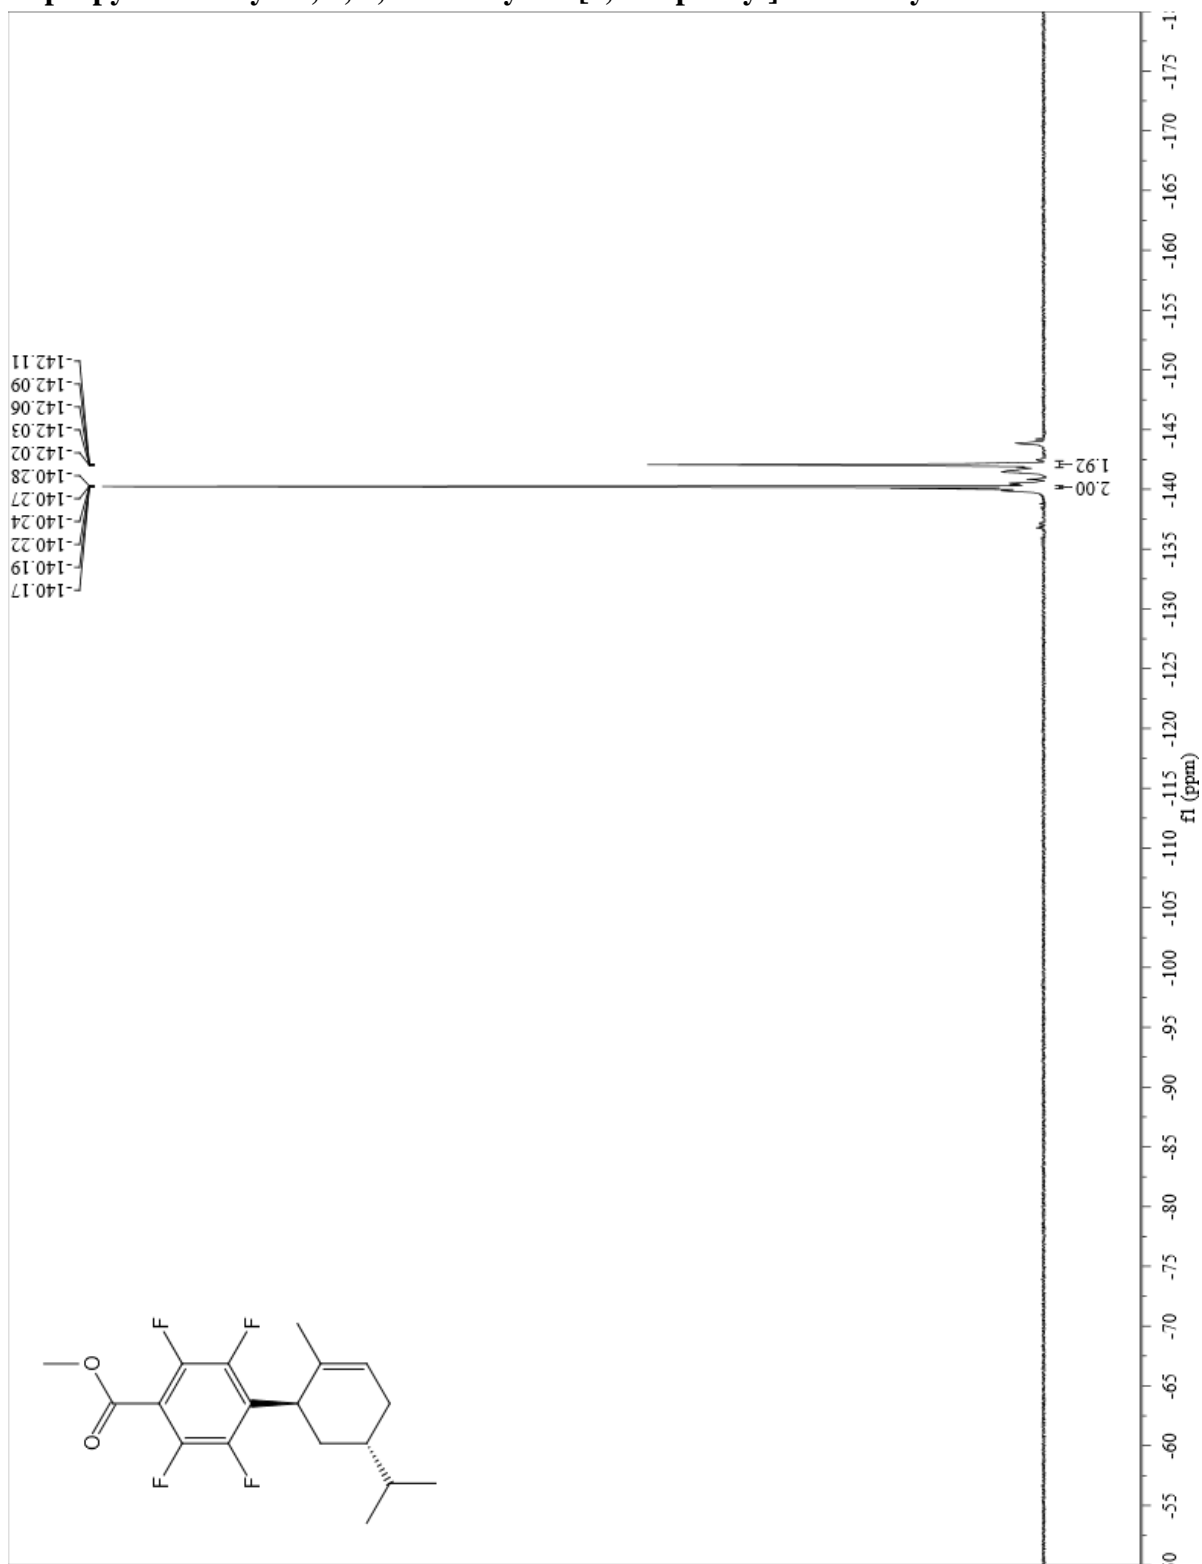

**<sup>1</sup>H NMR (400 MHz, Chloroform-*d*, @ rt) of S-30a (1'*R*,3'*S*)-methyl 2,3,5,6-tetrafluoro-3'-isopropyl-6'-methyl-1',2',3',4'-tetrahydro-[1,1'-biphenyl]-4-carboxylate**

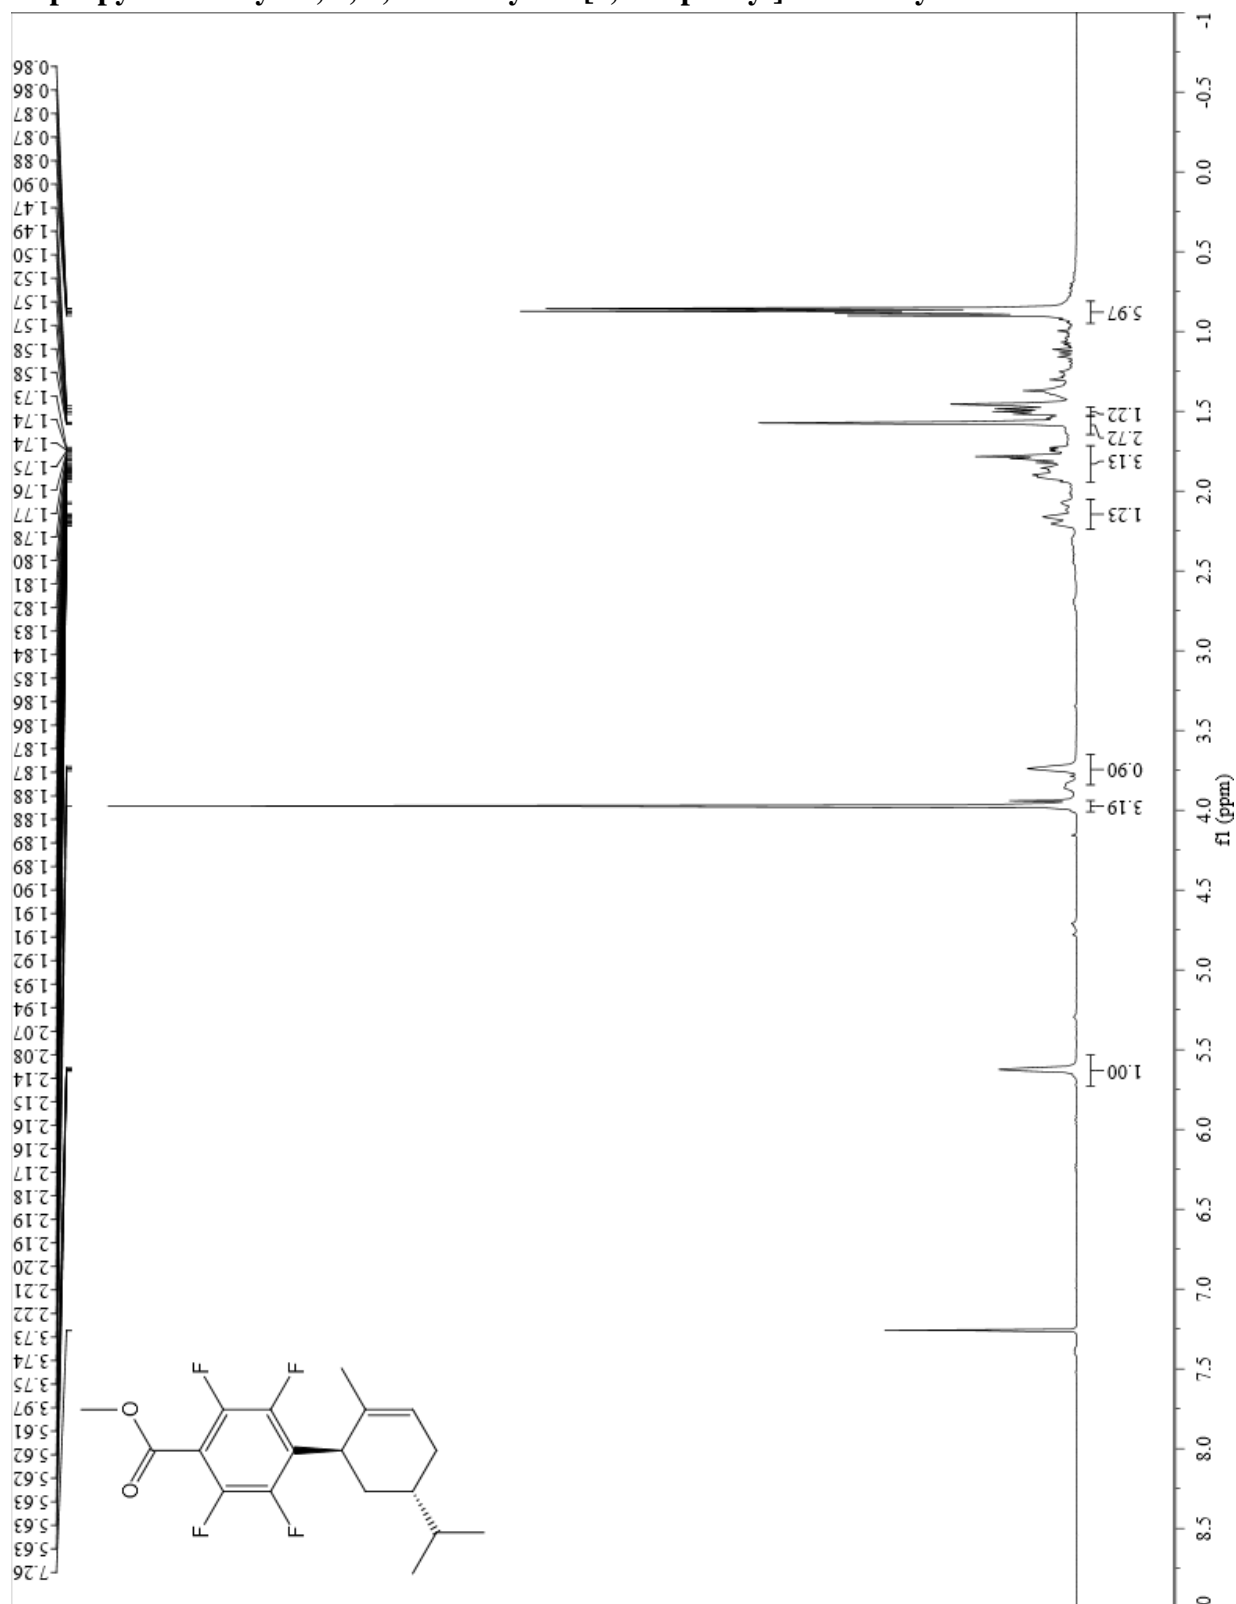

**$^{13}\text{C}\{^1\text{H}\}$  NMR (101 MHz, Chloroform-*d*, @ rt) of S-30a (1'R,3'S)-methyl 2,3,5,6-tetrafluoro-3'-isopropyl-6'-methyl-1',2',3',4'-tetrahydro-[1,1'-biphenyl]-4-carboxylate**

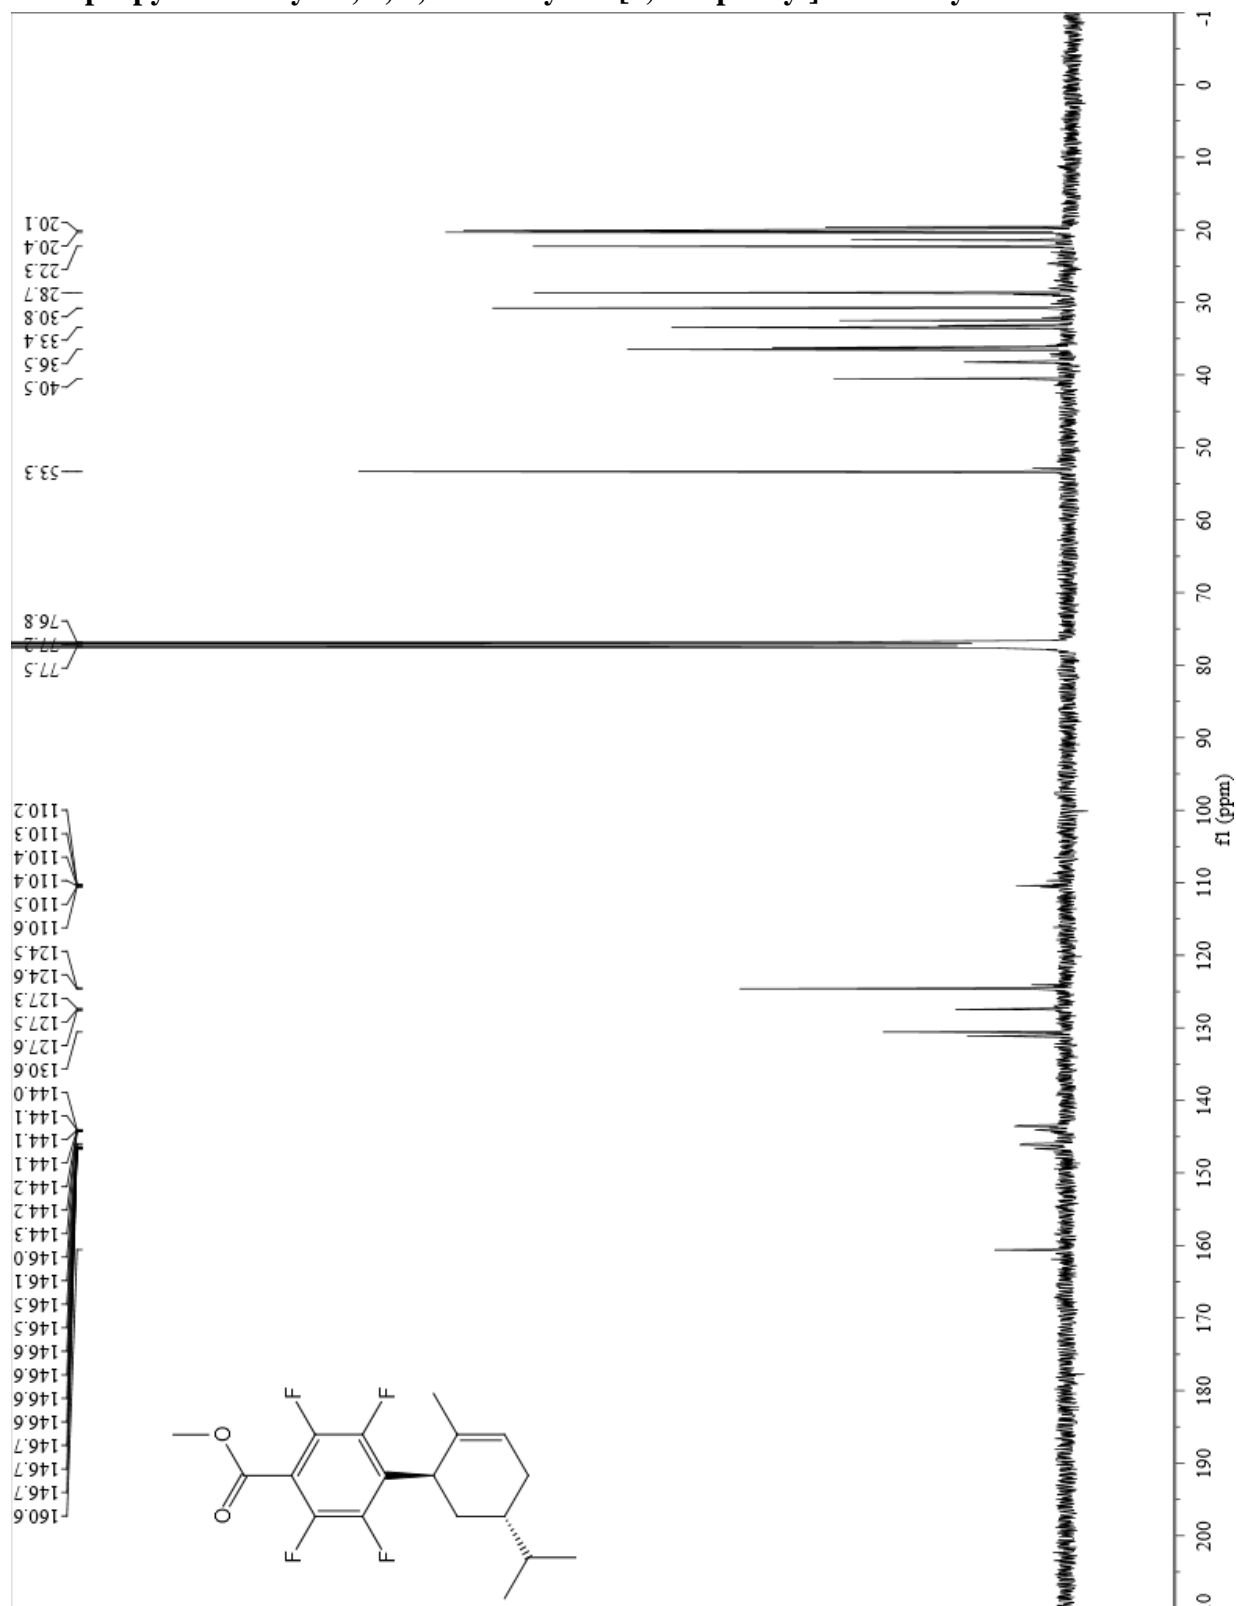

**GC and MS of S-30a (1'R,3'S)-methyl 2,3,5,6-tetrafluoro-3'-isopropyl-6'-methyl-1',2',3',4'-tetrahydro-[1,1'-biphenyl]-4-carboxylate**

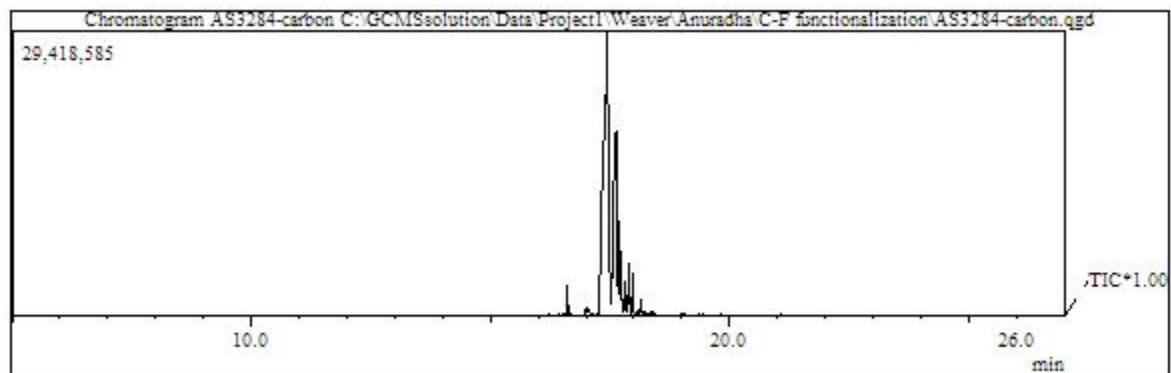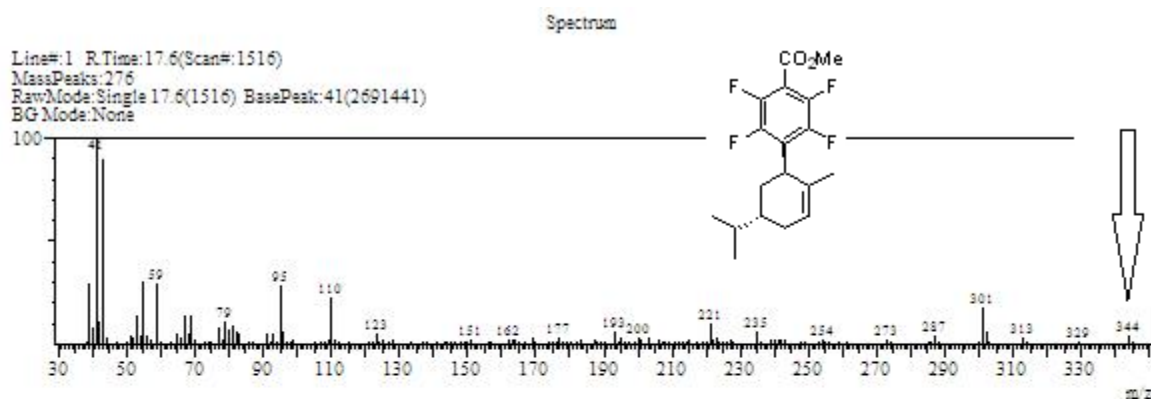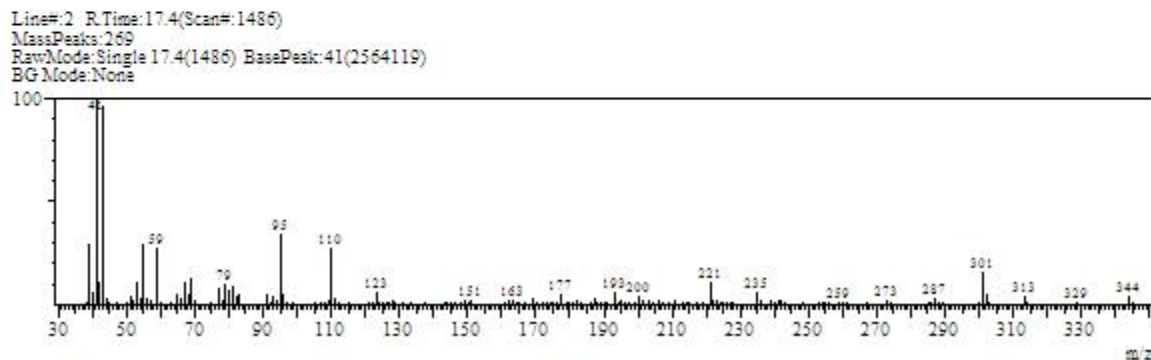

**<sup>19</sup>F NMR (376 MHz, acetone-*d*<sub>6</sub>, @ rt) of S-31a dimethyl 5-(4-(2-((2-ethoxy-2-oxoethyl)amino)-2-oxoethyl)-3,5-difluoropyridin-2-yl)-7-oxabicyclo[2.2.1]heptane-2,3-dicarboxylate**

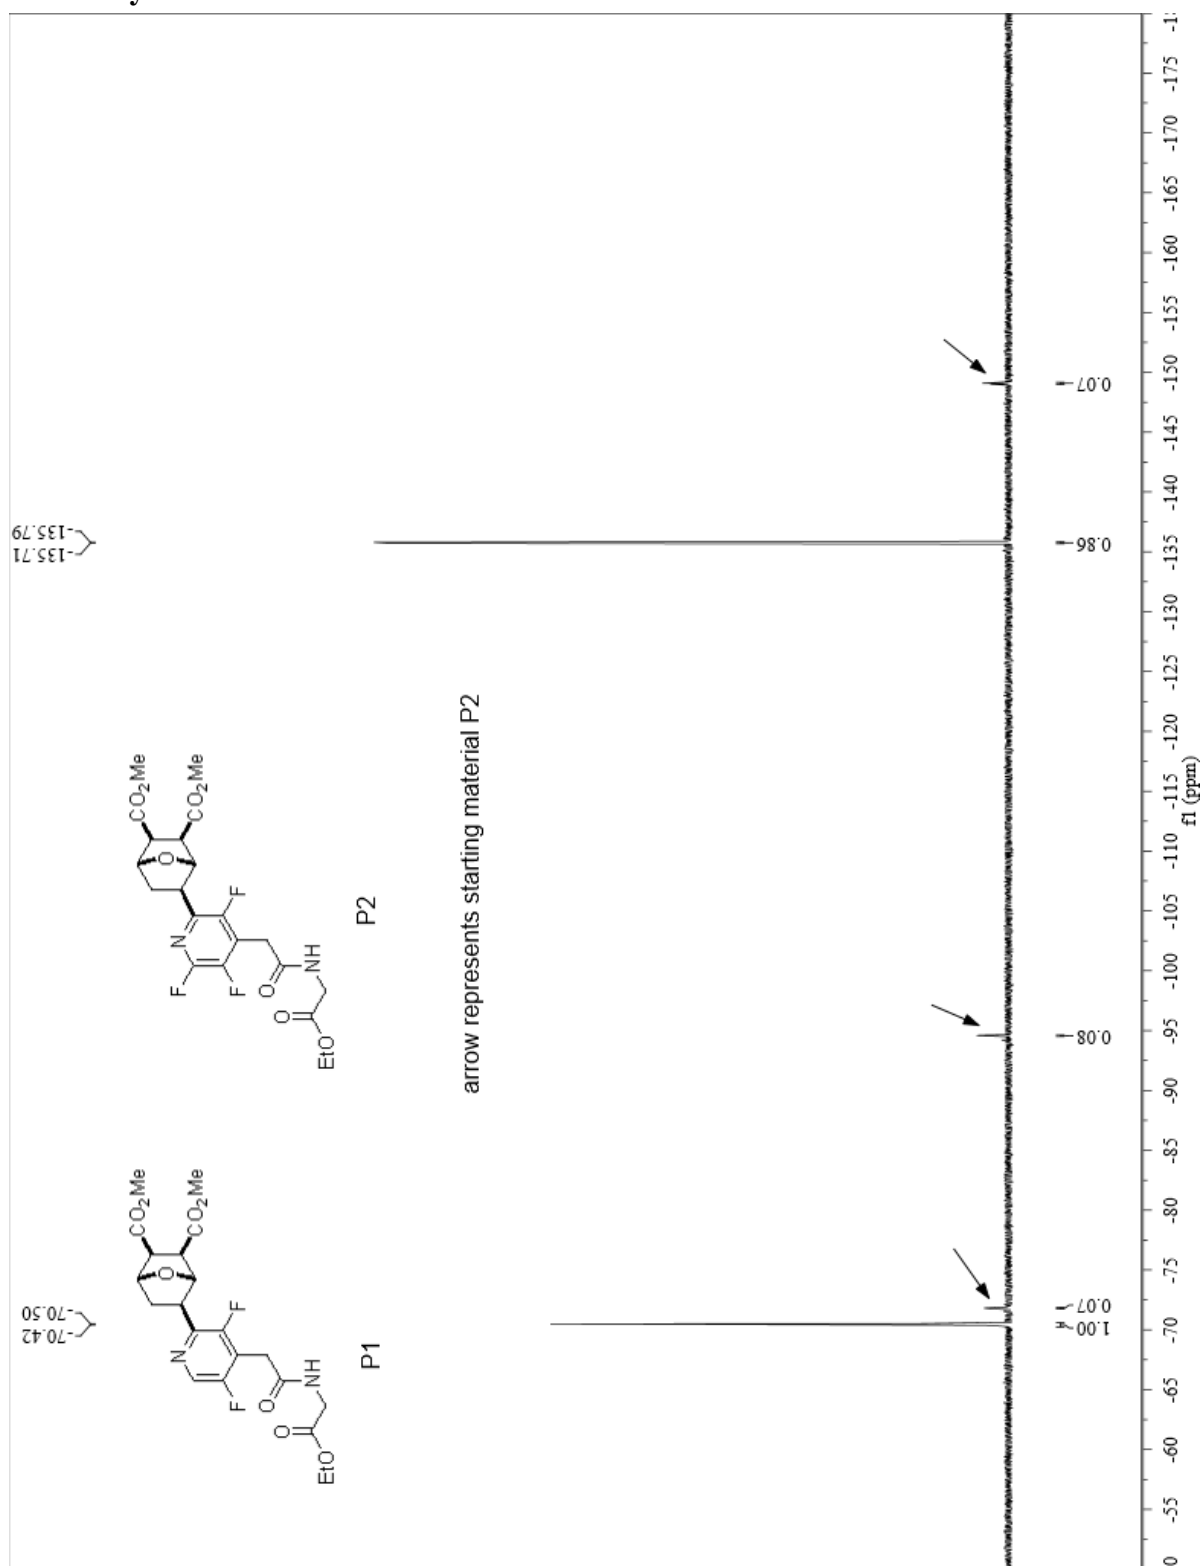

**<sup>1</sup>H NMR (400 MHz, acetone-*d*<sub>6</sub>, @ rt) of S-31a dimethyl 5-(4-(2-((2-ethoxy-2-oxoethyl)amino)-2-oxoethyl)-3,5-difluoropyridin-2-yl)-7-oxabicyclo[2.2.1]heptane-2,3-dicarboxylate**

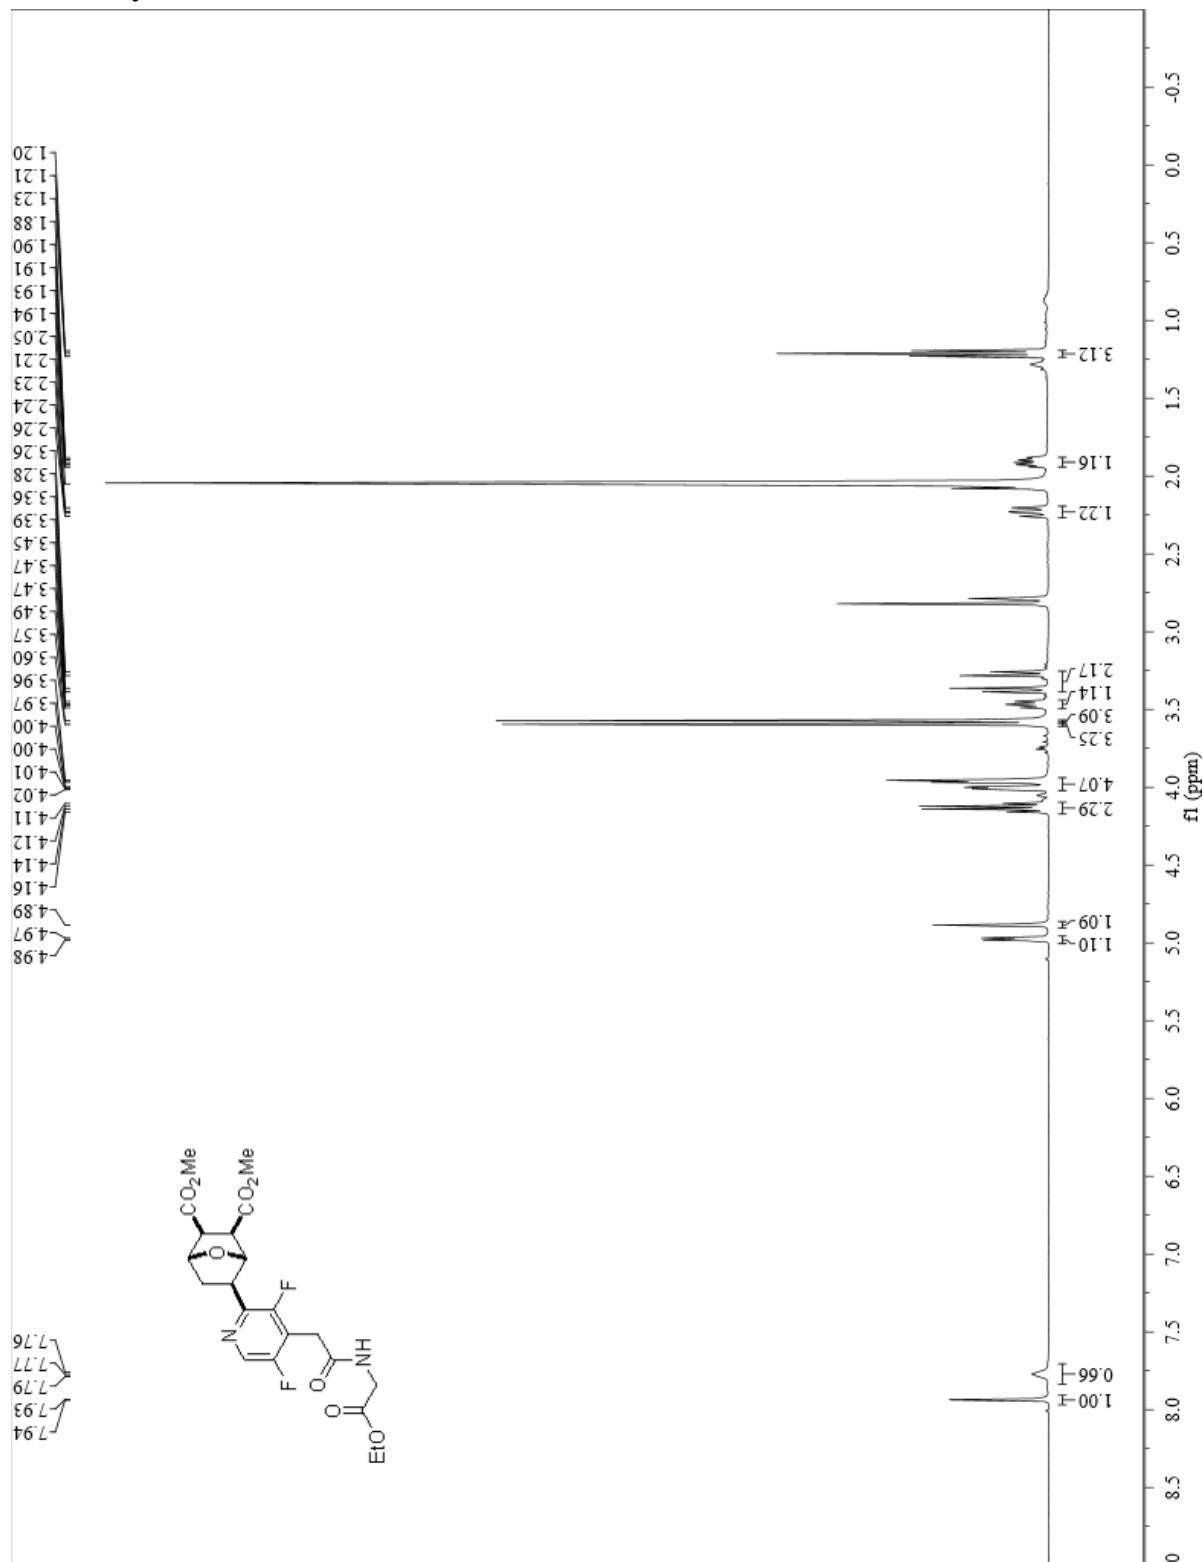

$^{13}\text{C}\{^1\text{H}\}$  NMR (151 MHz, acetone- $d_6$ , @ rt) of S-31a dimethyl 5-(4-(2-((2-ethoxy-2-oxoethyl)amino)-2-oxoethyl)-3,5-difluoropyridin-2-yl)-7-oxabicyclo[2.2.1]heptane-2,3-dicarboxylate

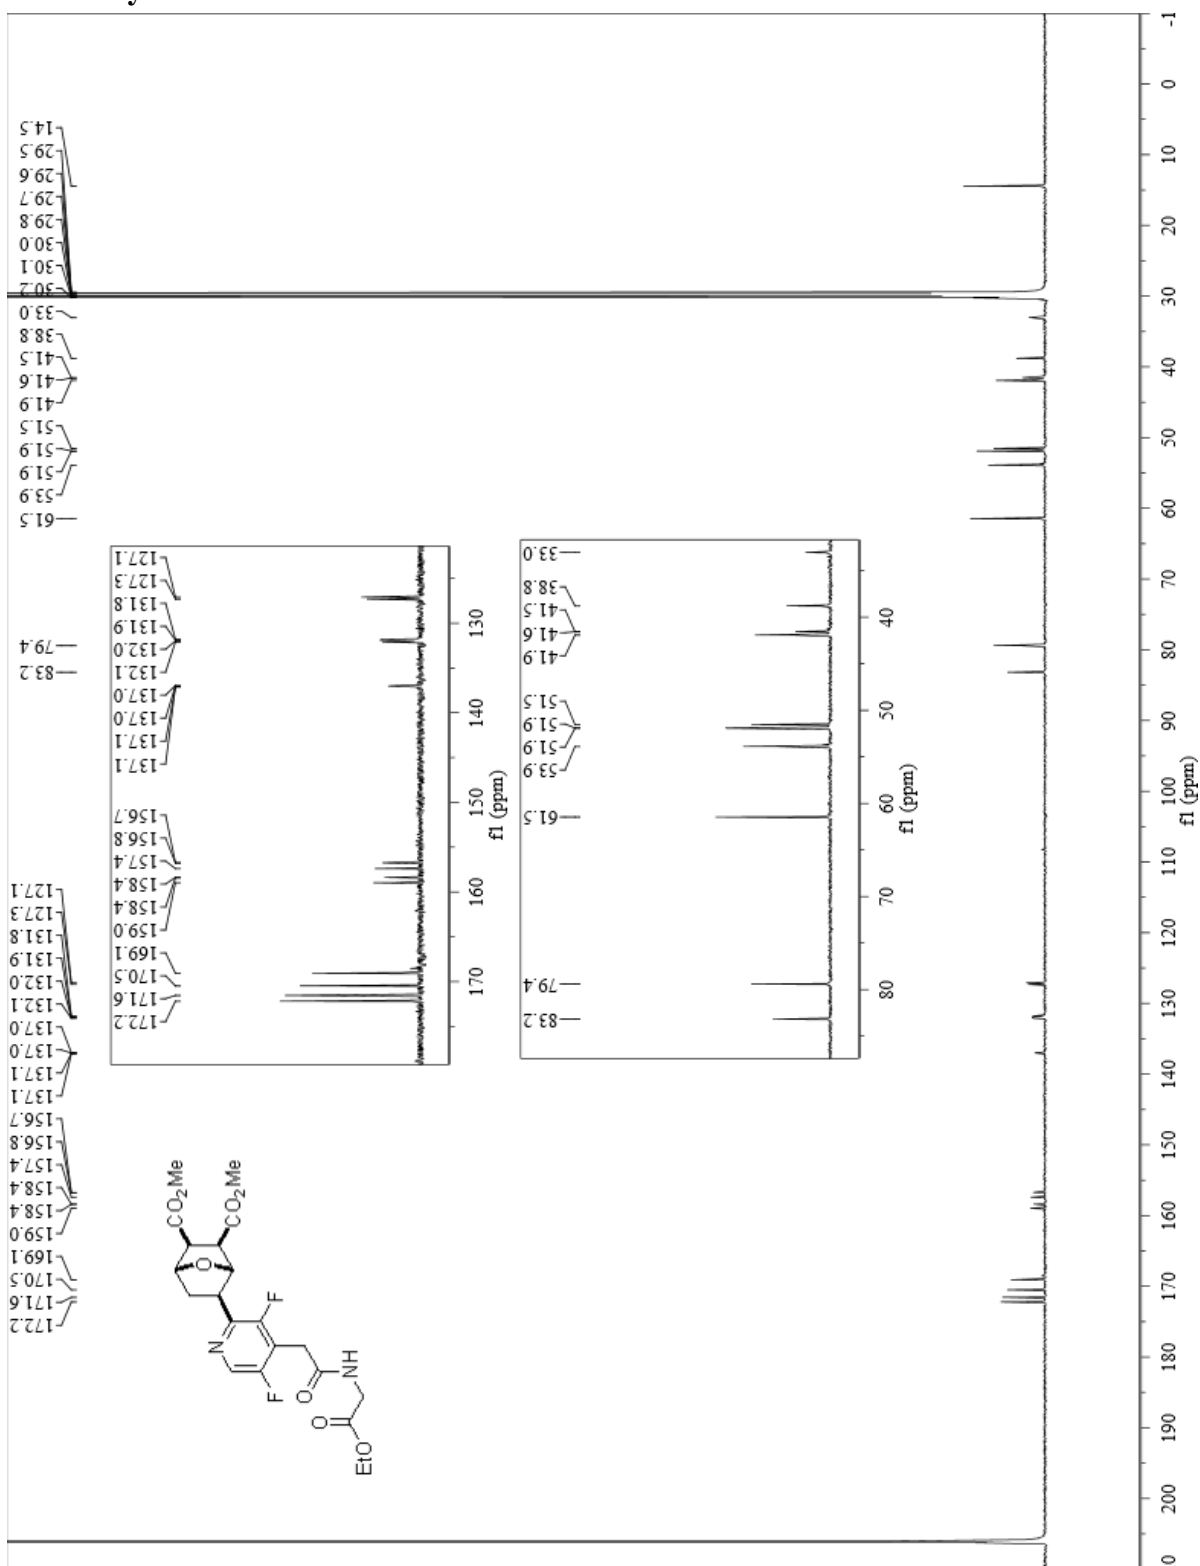



**<sup>19</sup>F NMR (376 MHz, acetone-*d*<sub>6</sub>, @ rt) of S-32a dimethyl 5-(4-(2-((2-ethoxy-2-oxoethyl)amino)-2-oxoethyl)-2,5-difluoropyridin-3-yl)-7-oxabicyclo[2.2.1]heptane-2,3-dicarboxylate**

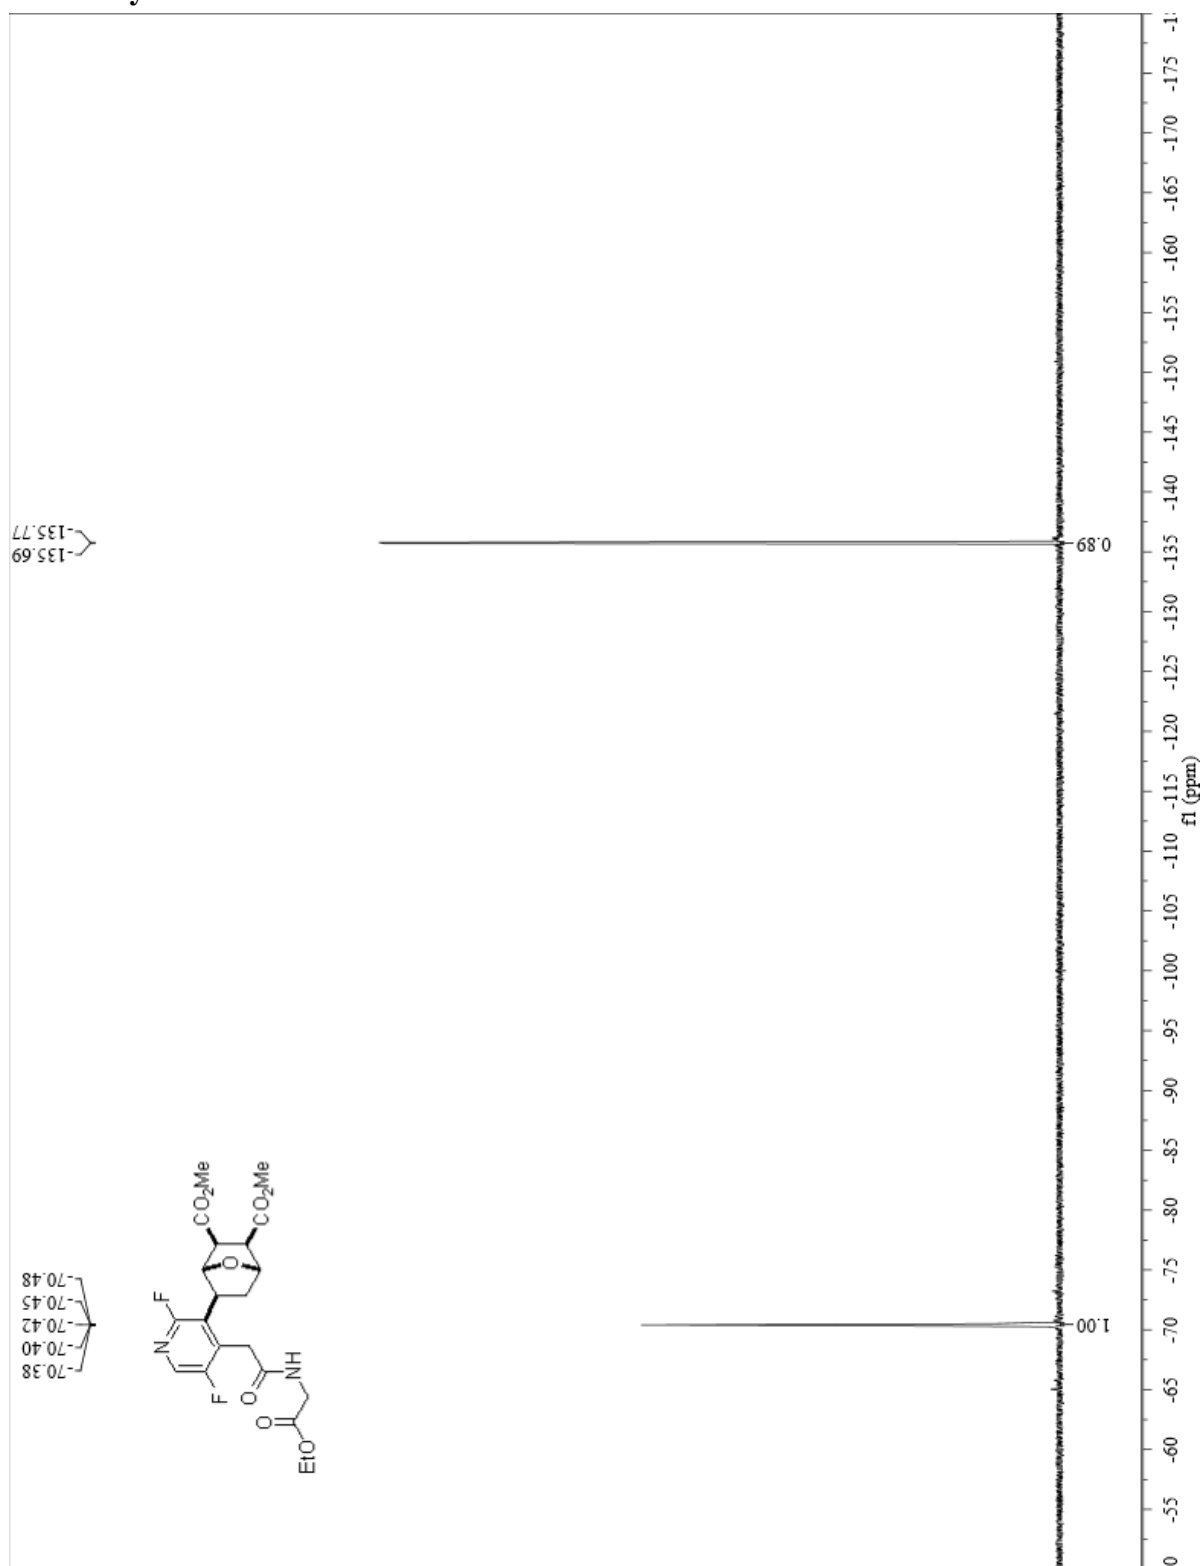

**<sup>1</sup>H NMR (400 MHz, acetone-*d*<sub>6</sub>, @ rt) of S-32a dimethyl 5-(4-(2-((2-ethoxy-2-oxoethyl)amino)-2-oxoethyl)-2,5-difluoropyridin-3-yl)-7-oxabicyclo[2.2.1]heptane-2,3-dicarboxylate**

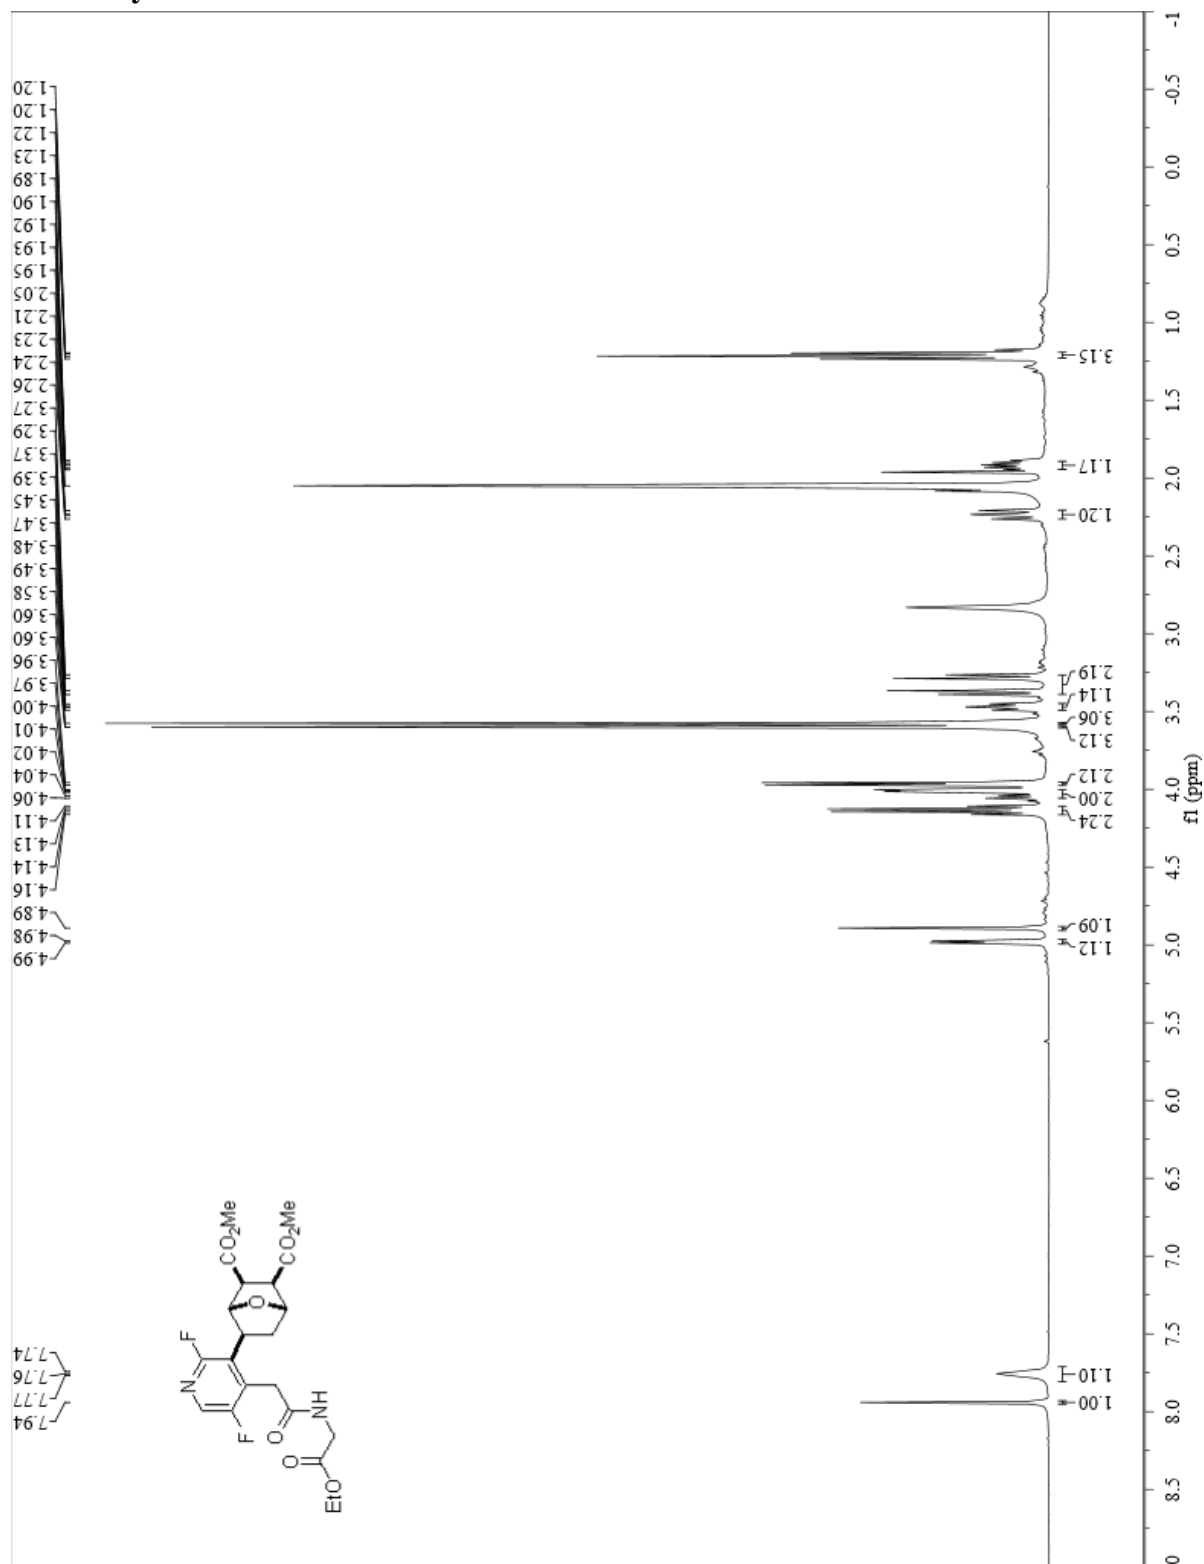

**$^{13}\text{C}\{^1\text{H}\}$  NMR (101 MHz, acetone- $d_6$ , @ rt) of S-32a dimethyl 5-(4-(2-((2-ethoxy-2-oxoethyl)amino)-2-oxoethyl)-2,5-difluoropyridin-3-yl)-7-oxabicyclo[2.2.1]heptane-2,3-dicarboxylate**

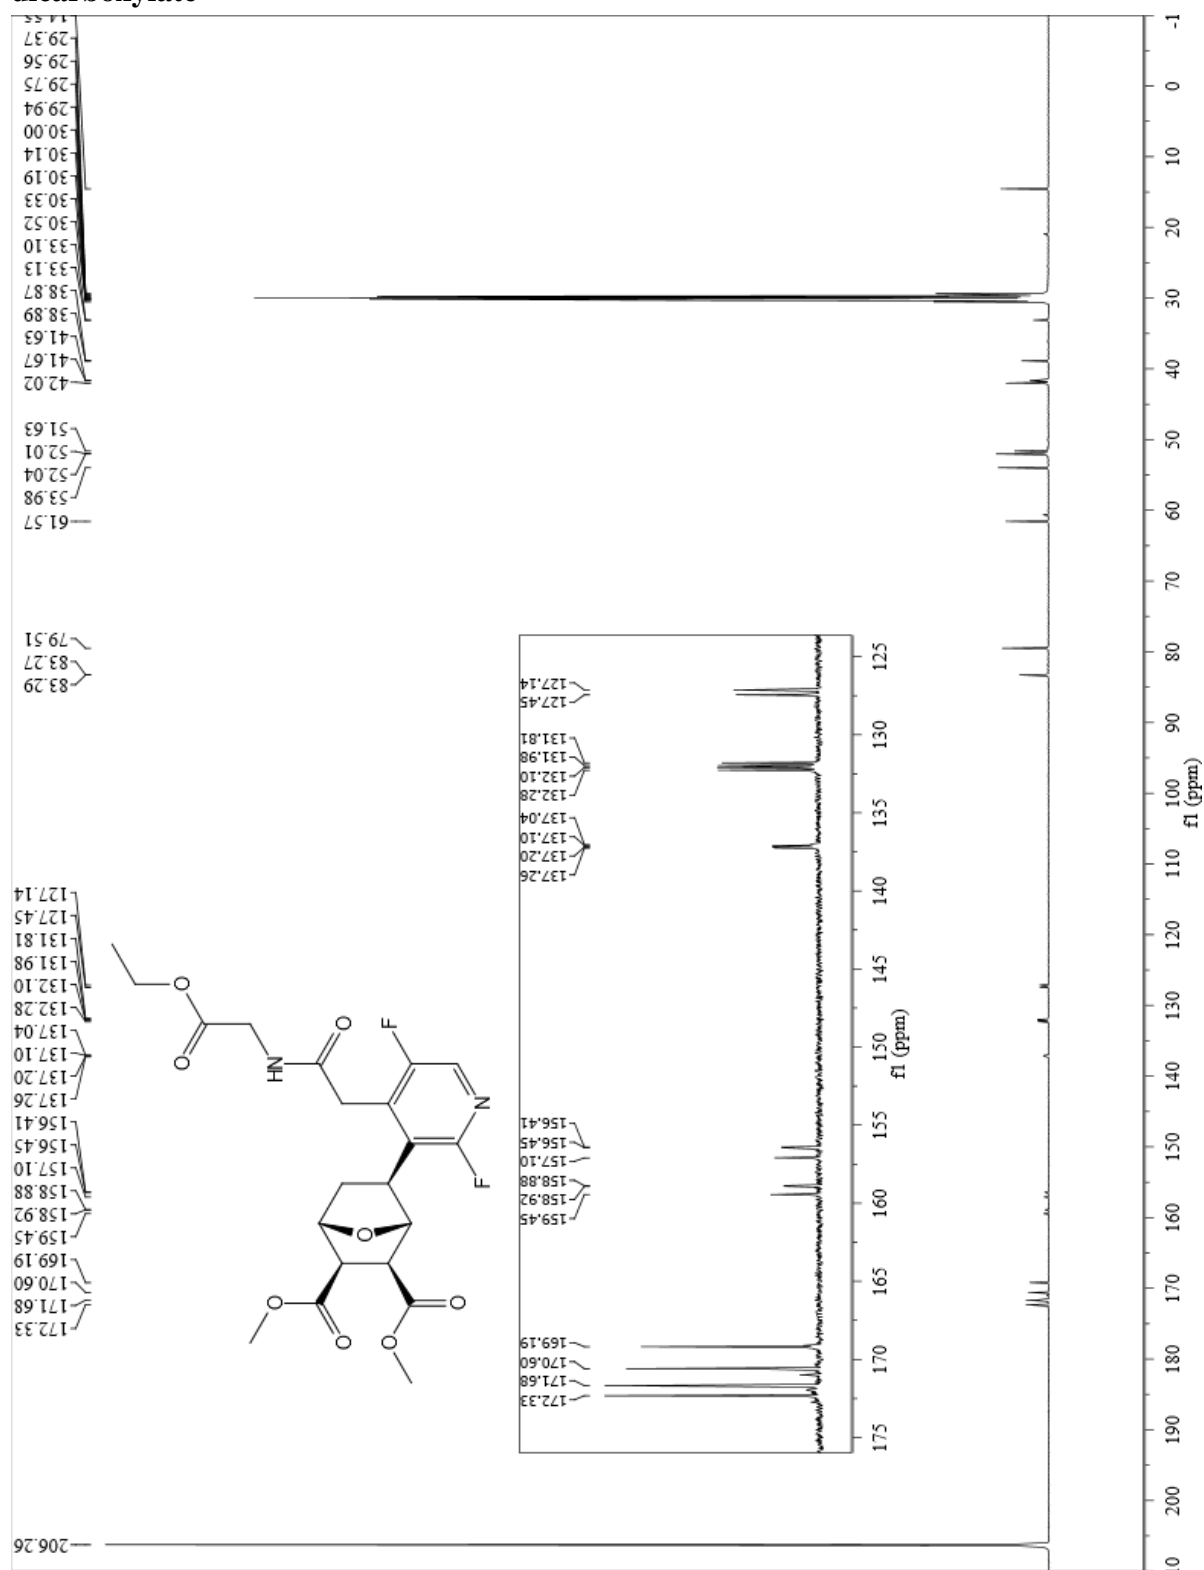

**<sup>19</sup>F NMR (376 MHz, acetone-*d*<sub>6</sub>, @ rt) of S-32a (minor rr) methyl 6-(4-(2-((2-ethoxy-2-oxoethyl)amino)-2-oxoethyl)-2,6-difluoropyridin-3-yl)-3-methyl-7-oxabicyclo[2.2.1]heptane-2-carboxylate**

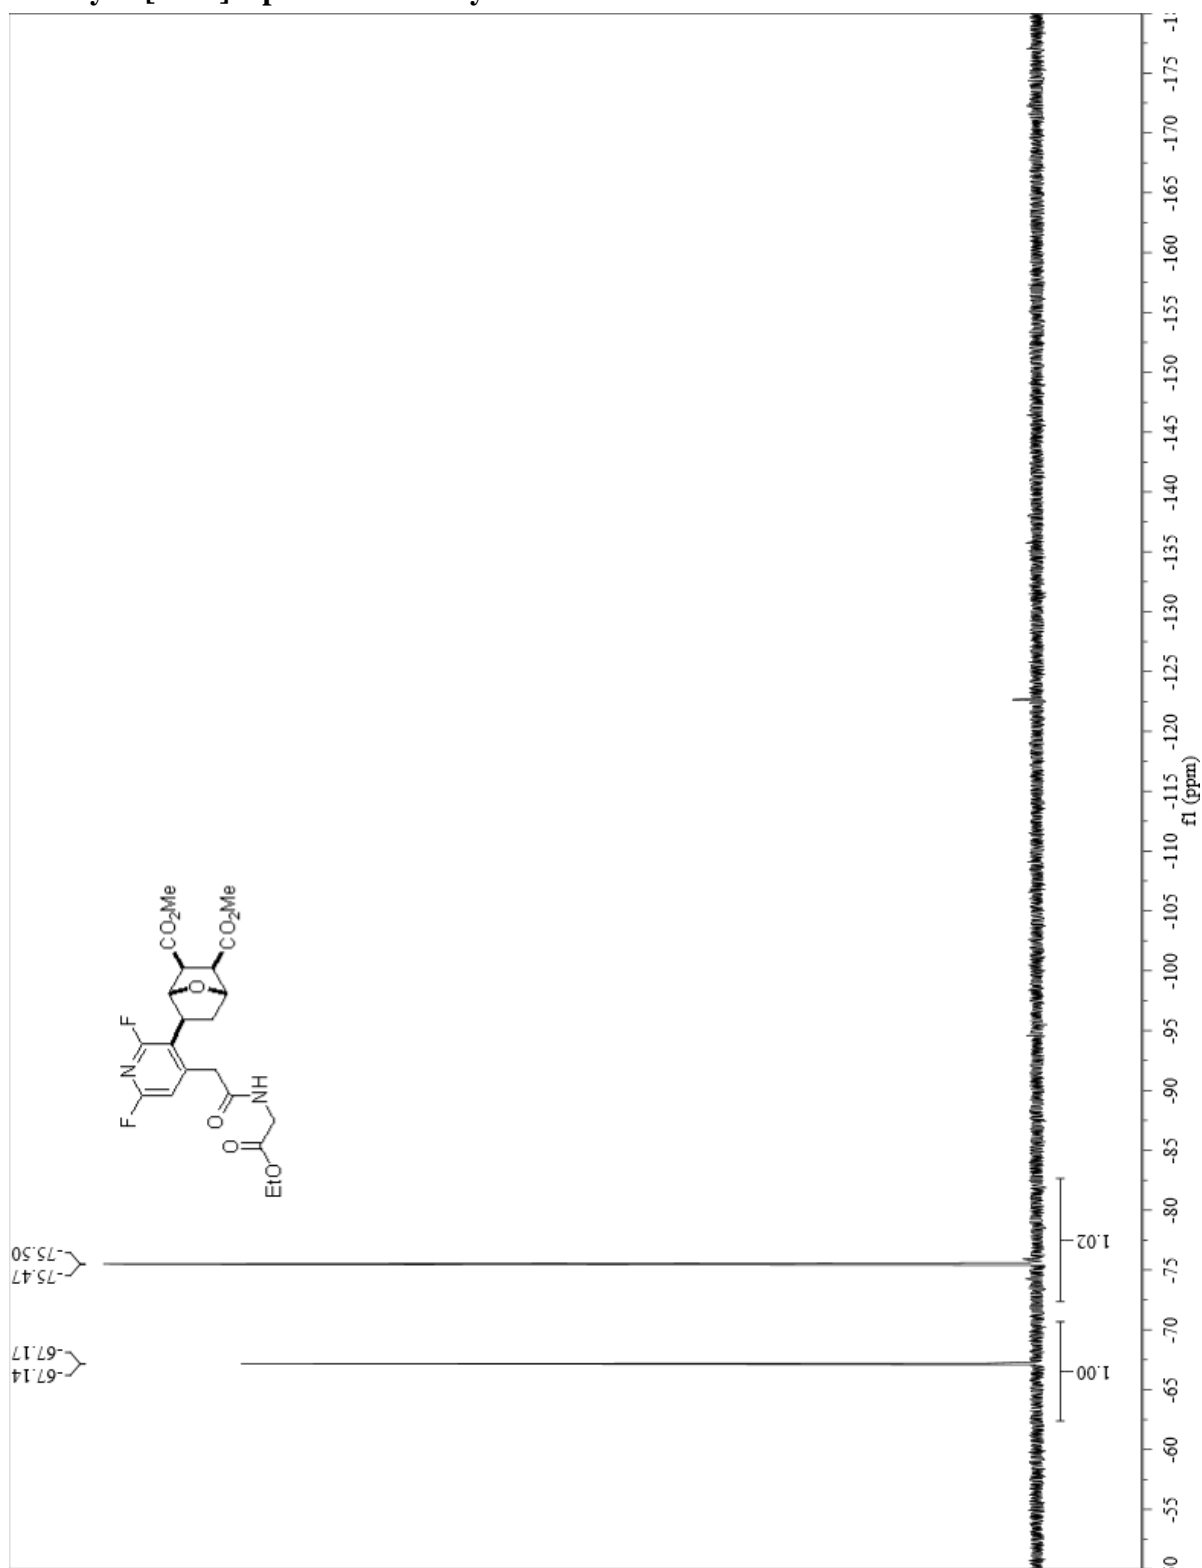

**<sup>1</sup>H NMR (400 MHz, acetone-*d*<sub>6</sub>, @ rt) of S-32a (minor rr) methyl 6-(4-(2-((2-ethoxy-2-oxoethyl)amino)-2-oxoethyl)-2,6-difluoropyridin-3-yl)-3-methyl-7-oxabicyclo[2.2.1]heptane-2-carboxylate**

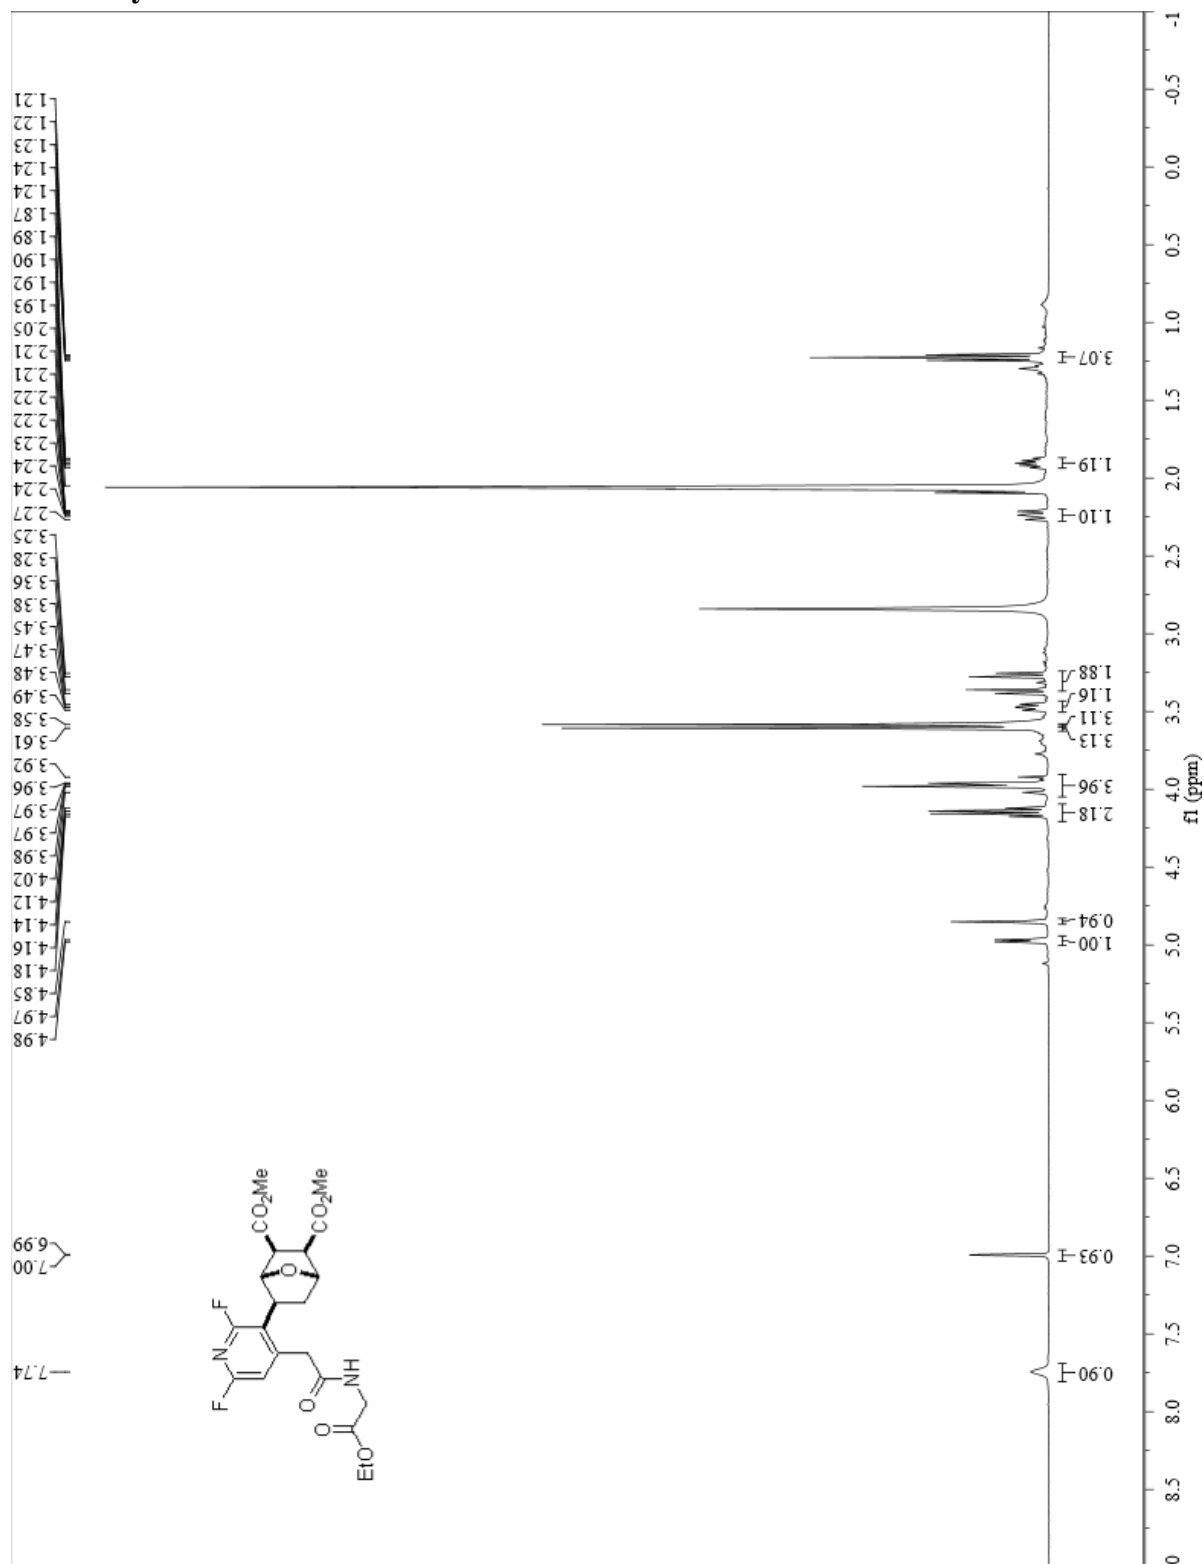

**<sup>19</sup>F NMR (376 MHz, Chloroform-*d*, @ rt) of S-33'a dimethyl 5-(2,5,6-trifluoro-4-(2-methoxy-2-oxoethyl)pyridin-3-yl)-7-oxabicyclo[2.2.1]heptane-2,3-dicarboxylate**

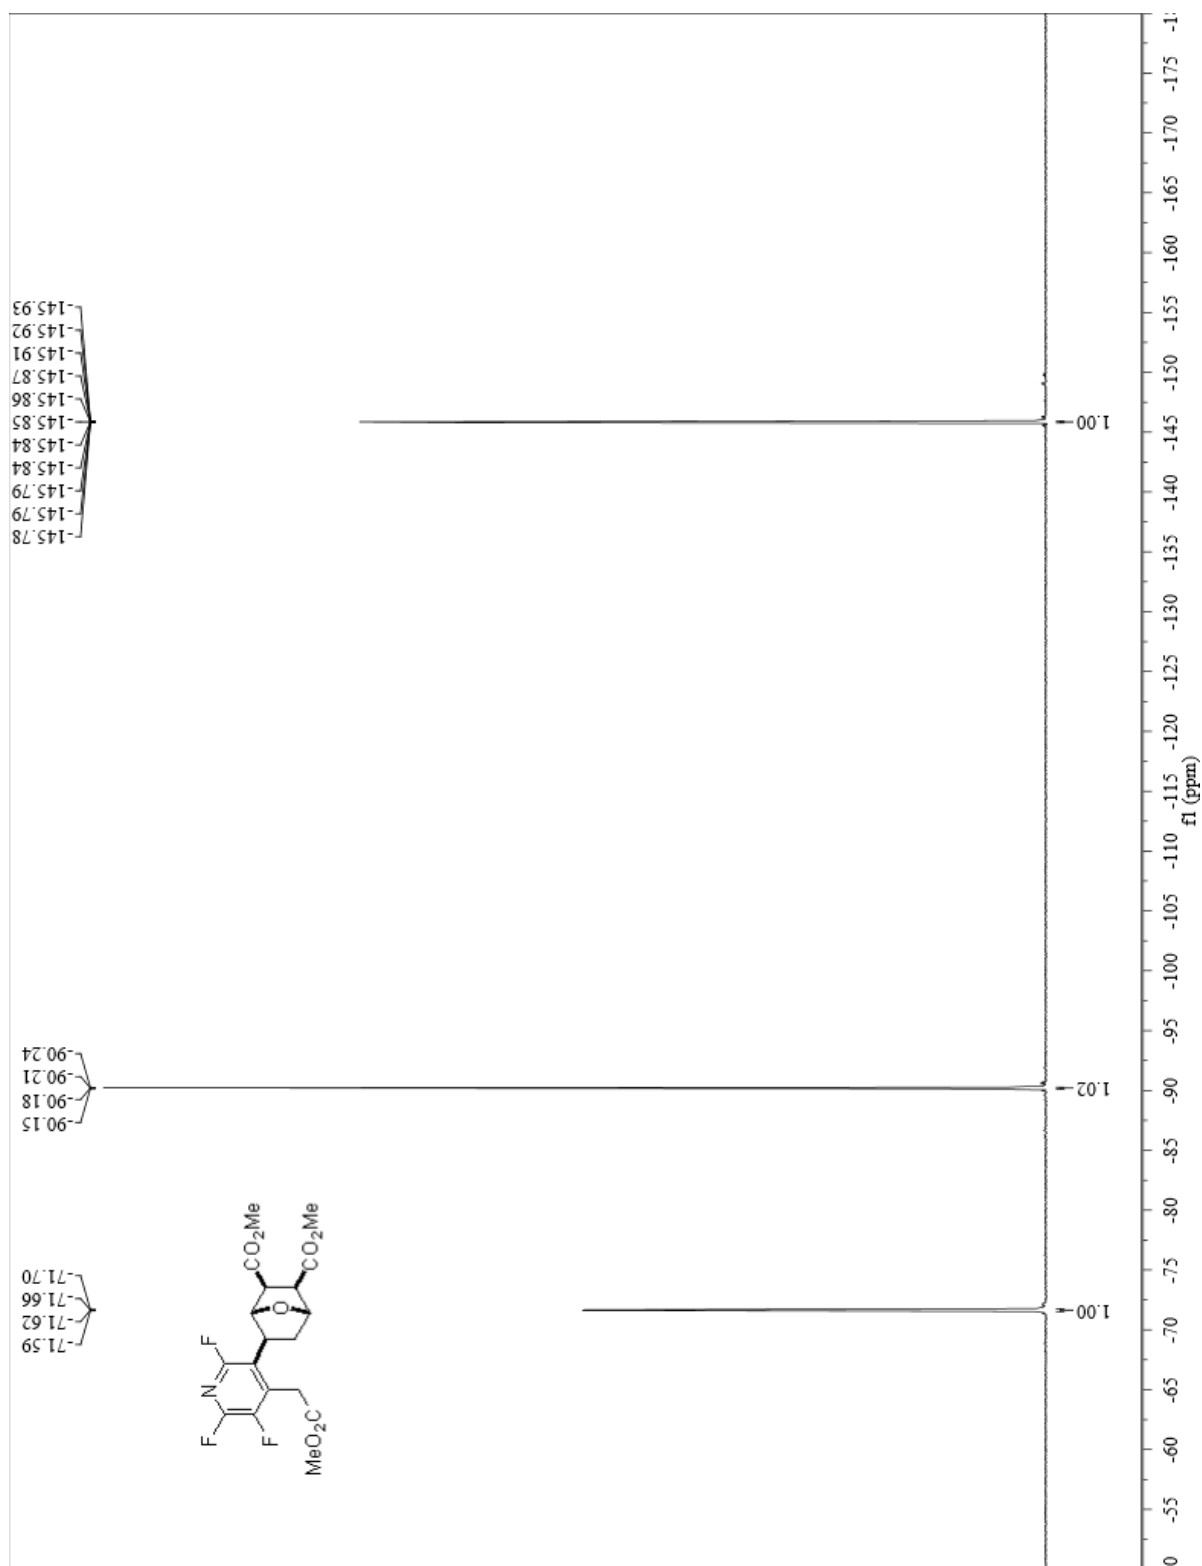

**<sup>1</sup>H NMR (400 MHz, Chloroform-*d*, @ rt) of S-33'a dimethyl 5-(2,5,6-trifluoro-4-(2-methoxy-2-oxoethyl)pyridin-3-yl)-7-oxabicyclo[2.2.1]heptane-2,3-dicarboxylate**

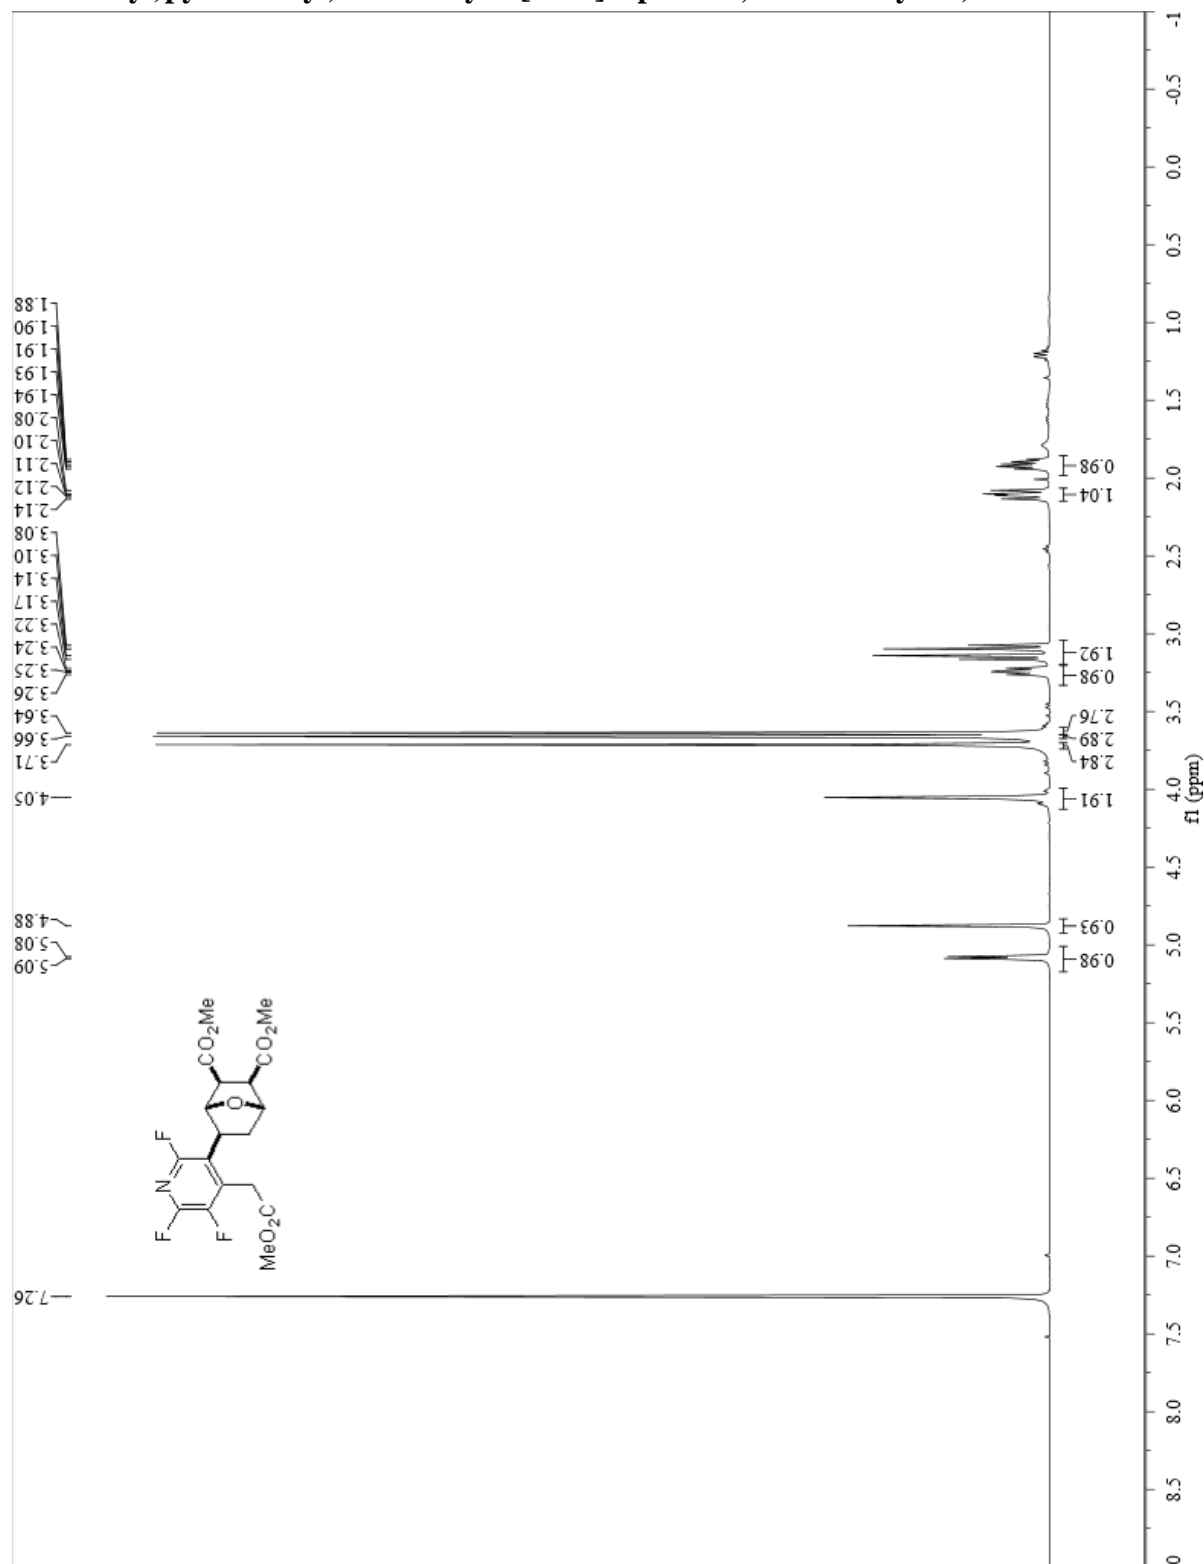

**$^{13}\text{C}\{^1\text{H}\}$  NMR (101 MHz, Chloroform-*d*, @ rt) of S-33'a dimethyl 5-(2,5,6-trifluoro-4-(2-methoxy-2-oxoethyl)pyridin-3-yl)-7-oxabicyclo[2.2.1]heptane-2,3-dicarboxylate**

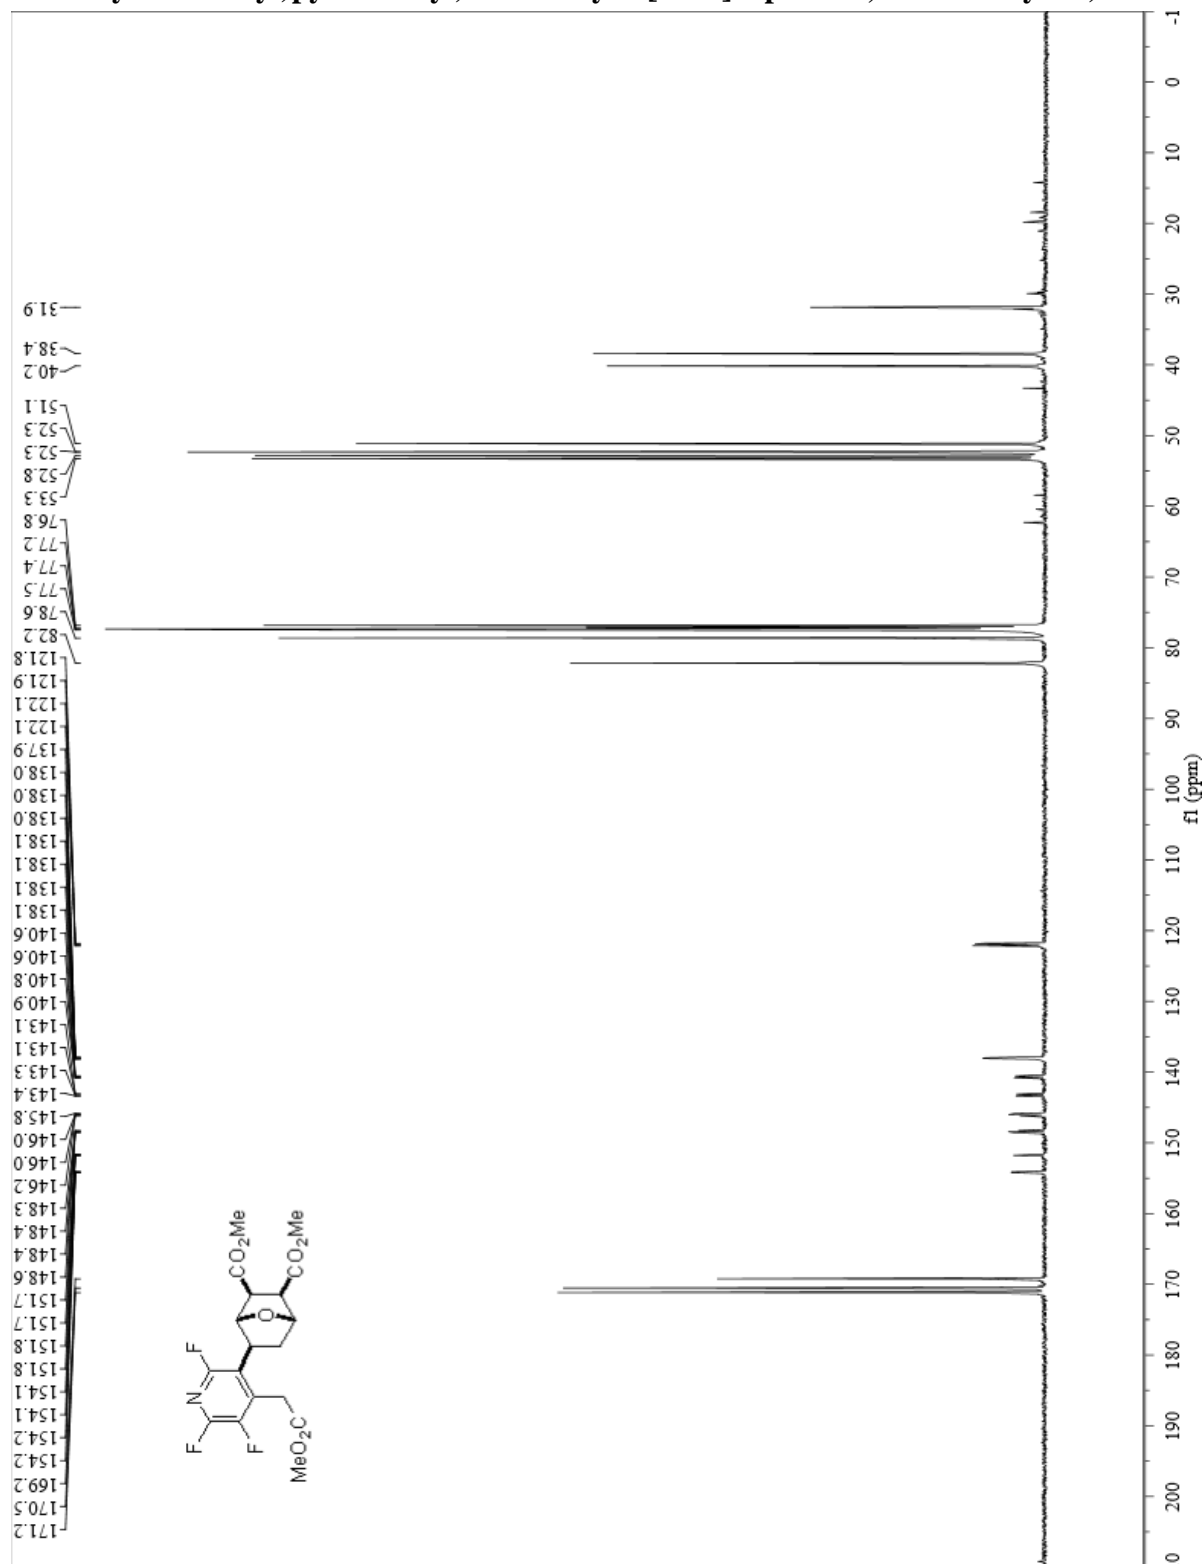



**<sup>19</sup>F NMR (376 MHz, Chloroform-*d*, @ rt) of S-33a dimethyl 5-(2,5-difluoro-4-(2-methoxy-2-oxoethyl)pyridin-3-yl)-7-oxabicyclo[2.2.1]heptane-2,3-dicarboxylate**

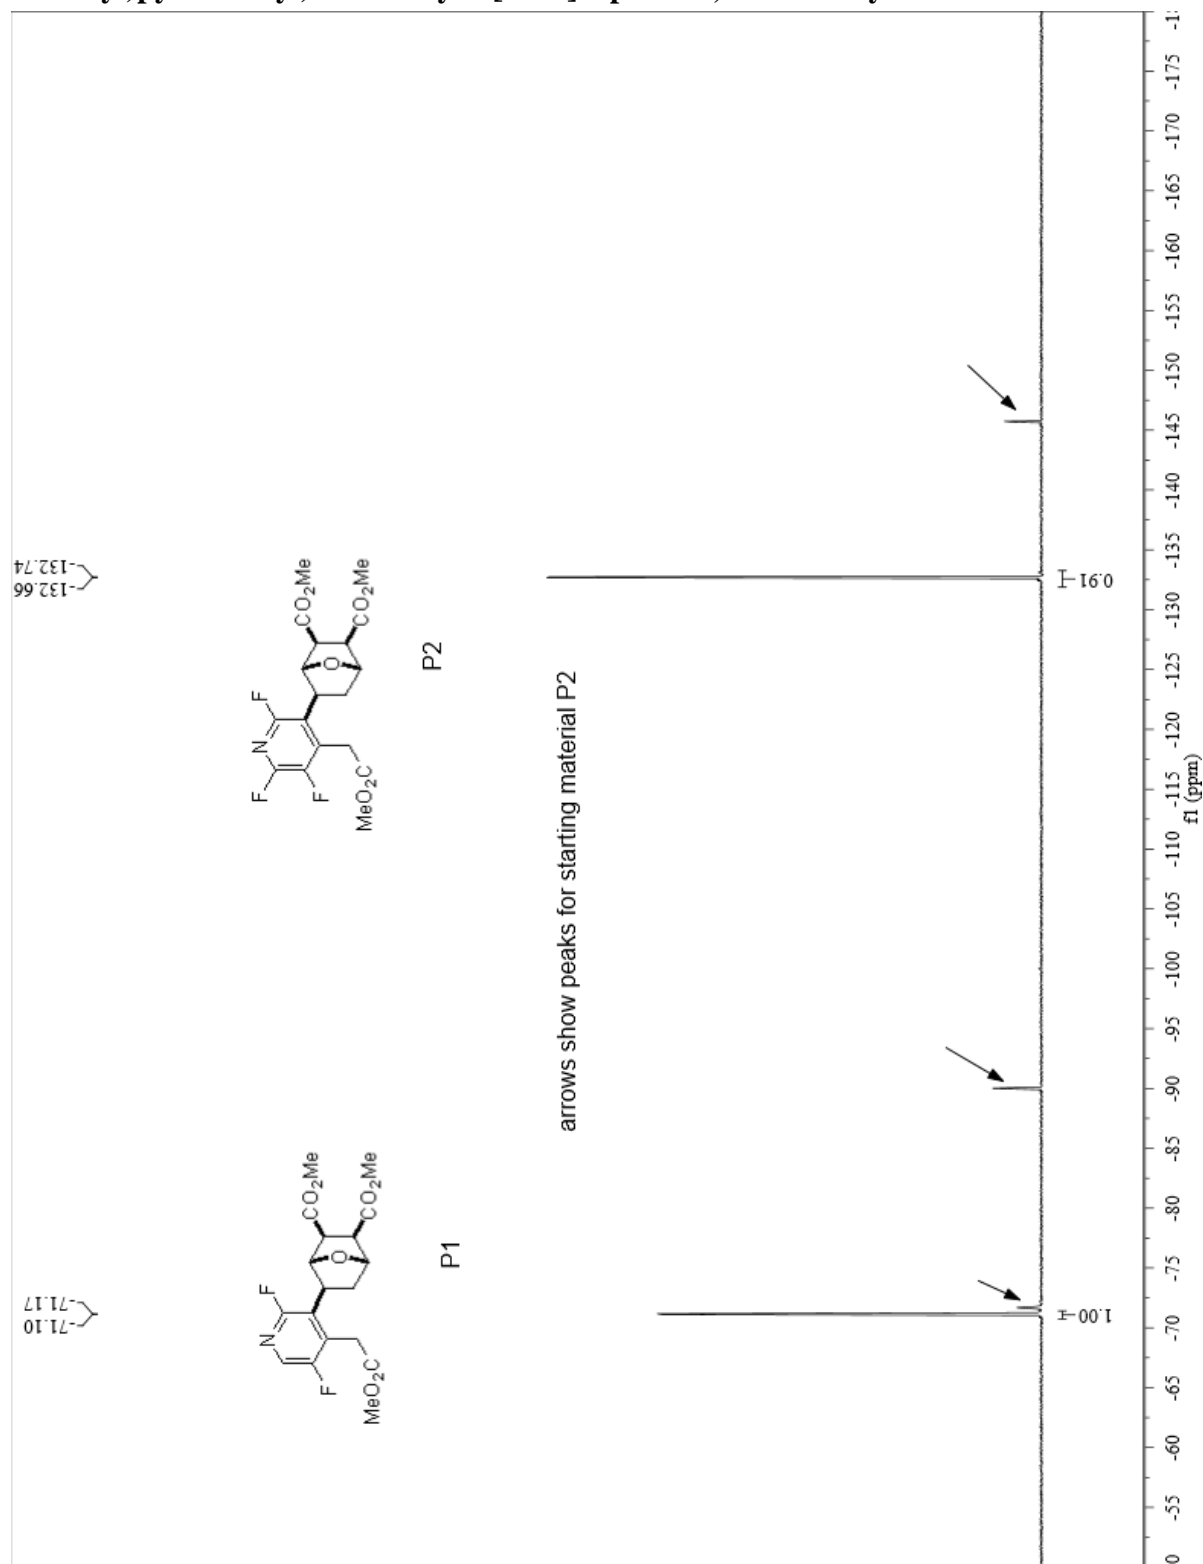

**<sup>1</sup>H NMR (400 MHz, Chloroform-*d*, @ rt) of S-33a dimethyl 5-(2,5-difluoro-4-(2-methoxy-2-oxoethyl)pyridin-3-yl)-7-oxabicyclo[2.2.1]heptane-2,3-dicarboxylate**

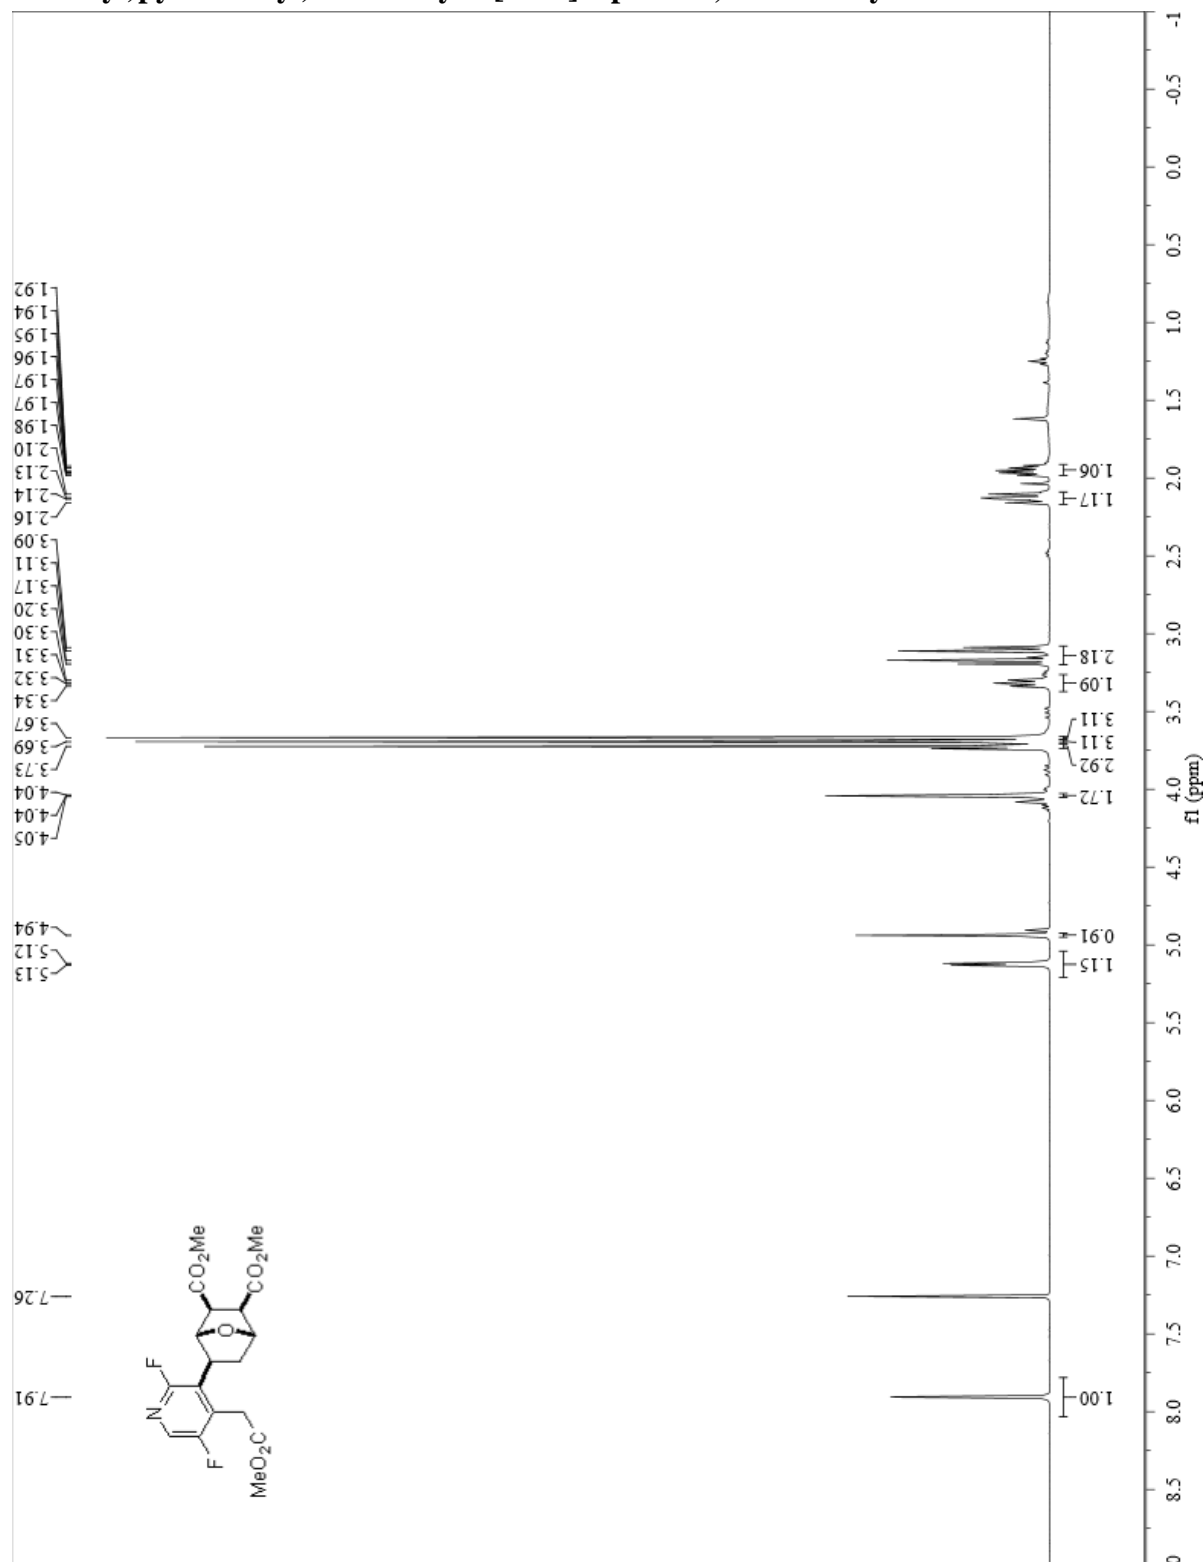

**$^{13}\text{C}\{^1\text{H}\}$  NMR (101 MHz, Chloroform-*d*, @ rt) of S-33a dimethyl 5-(2,5-difluoro-4-(2-methoxy-2-oxoethyl)pyridin-3-yl)-7-oxabicyclo[2.2.1]heptane-2,3-dicarboxylate**

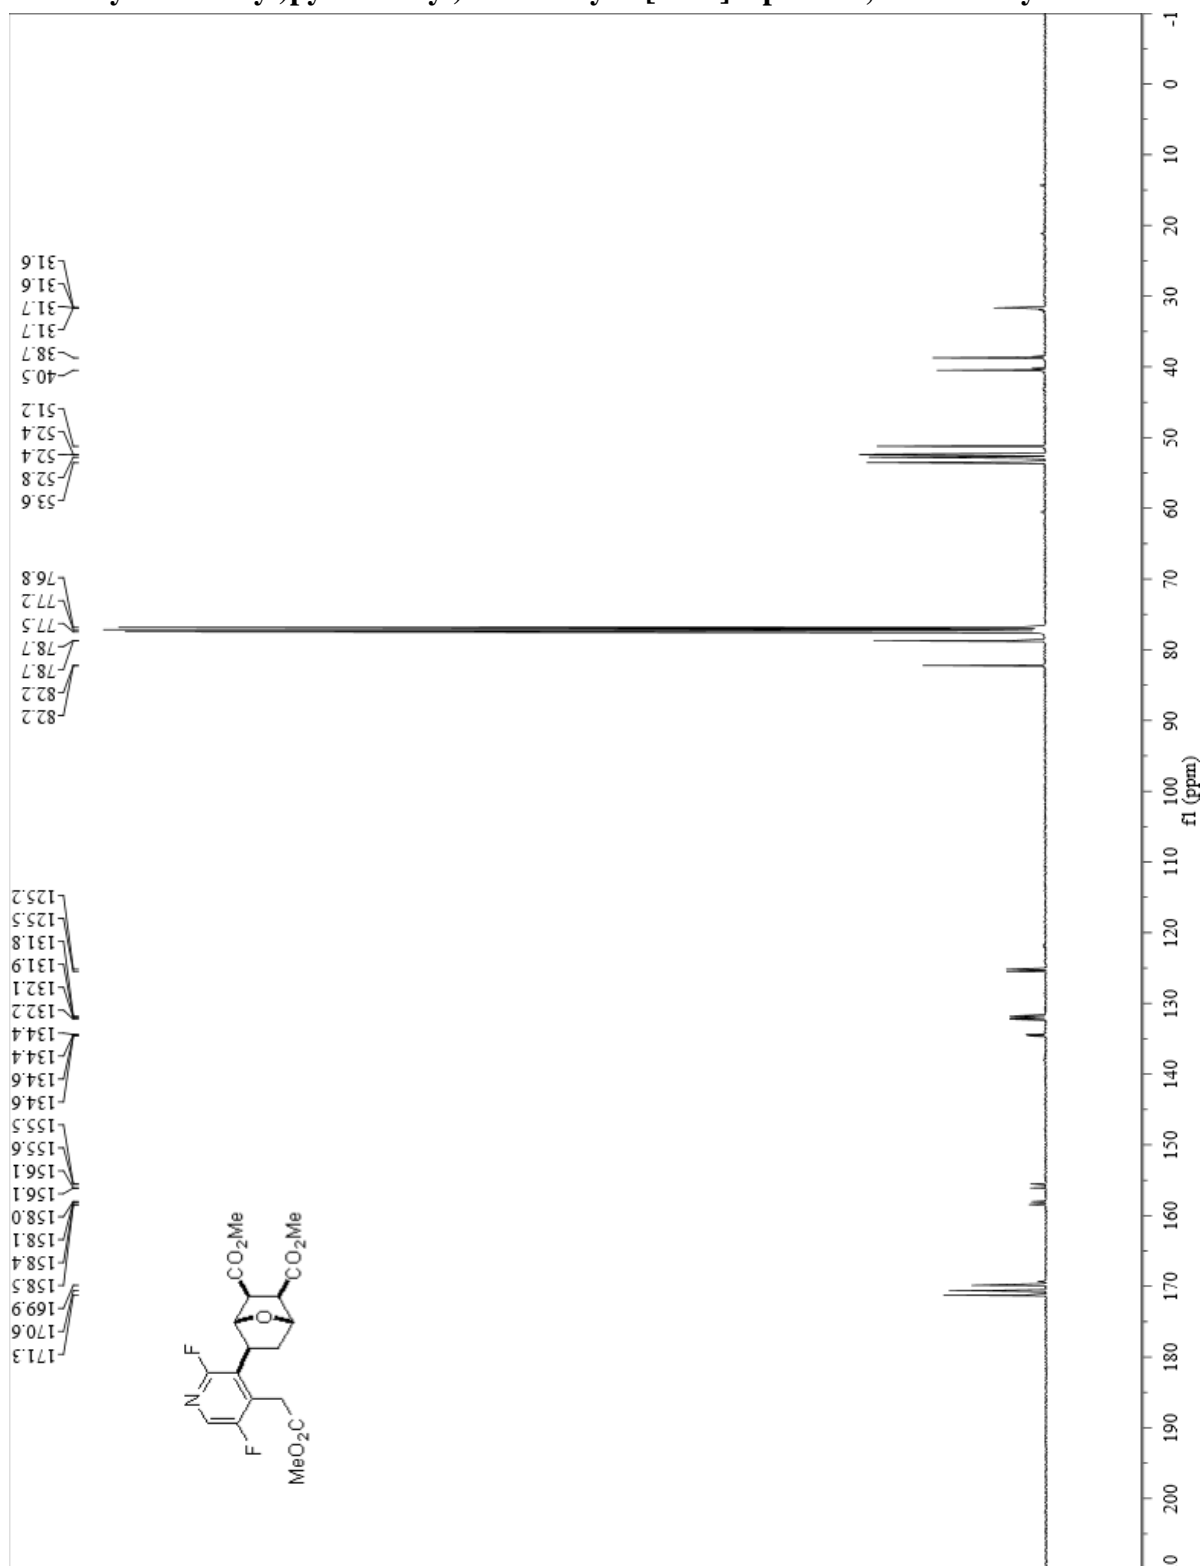

**GC and MS of S-33a dimethyl 5-(2,5-difluoro-4-(2-methoxy-2-oxoethyl)pyridin-3-yl)-7-oxabicyclo[2.2.1]heptane-2,3-dicarboxylate**

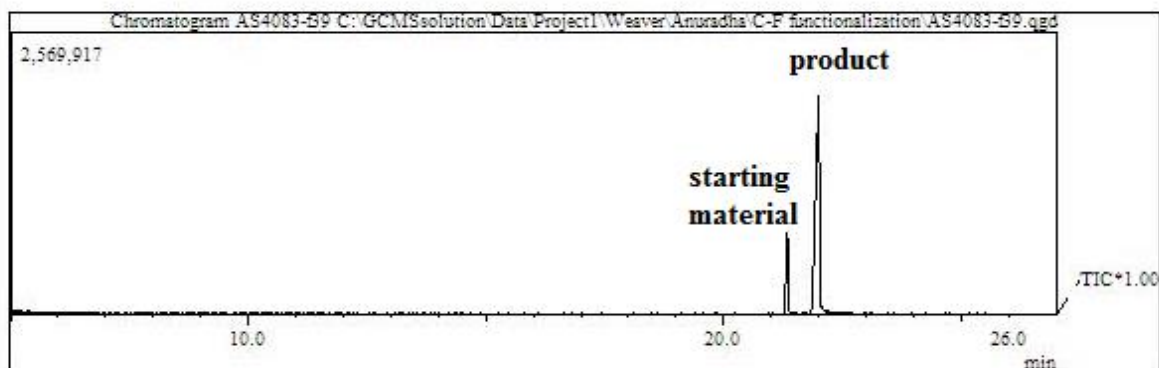

Spectrum

Line# 1 R.Time: 22.0(Scan#: 2036)  
 MassPeaks: 198  
 RawMode: Single 22.0(2036) BasePeak: 59(355976)  
 BG Mode: None

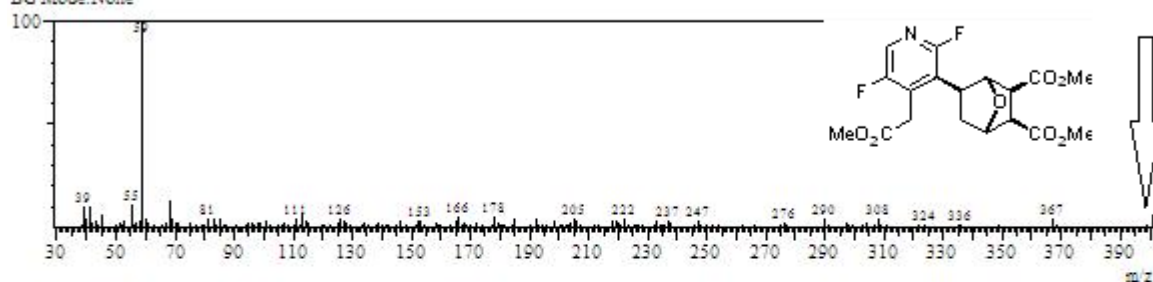

Line# 2 R.Time: 21.3(Scan#: 1959)  
 MassPeaks: 106  
 RawMode: Single 21.3(1959) BasePeak: 59(114143)  
 BG Mode: None

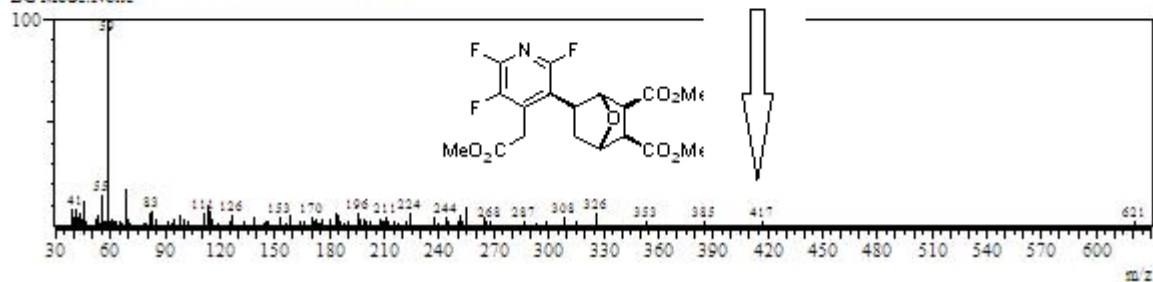

**<sup>19</sup>F NMR (376 MHz, Chloroform-*d*, @ rt) of S-34a methyl 2-(bicyclo[2.2.1]heptan-2-yl)-3,5-difluoro-4-(2-methoxy-2-oxoethyl)benzoate**

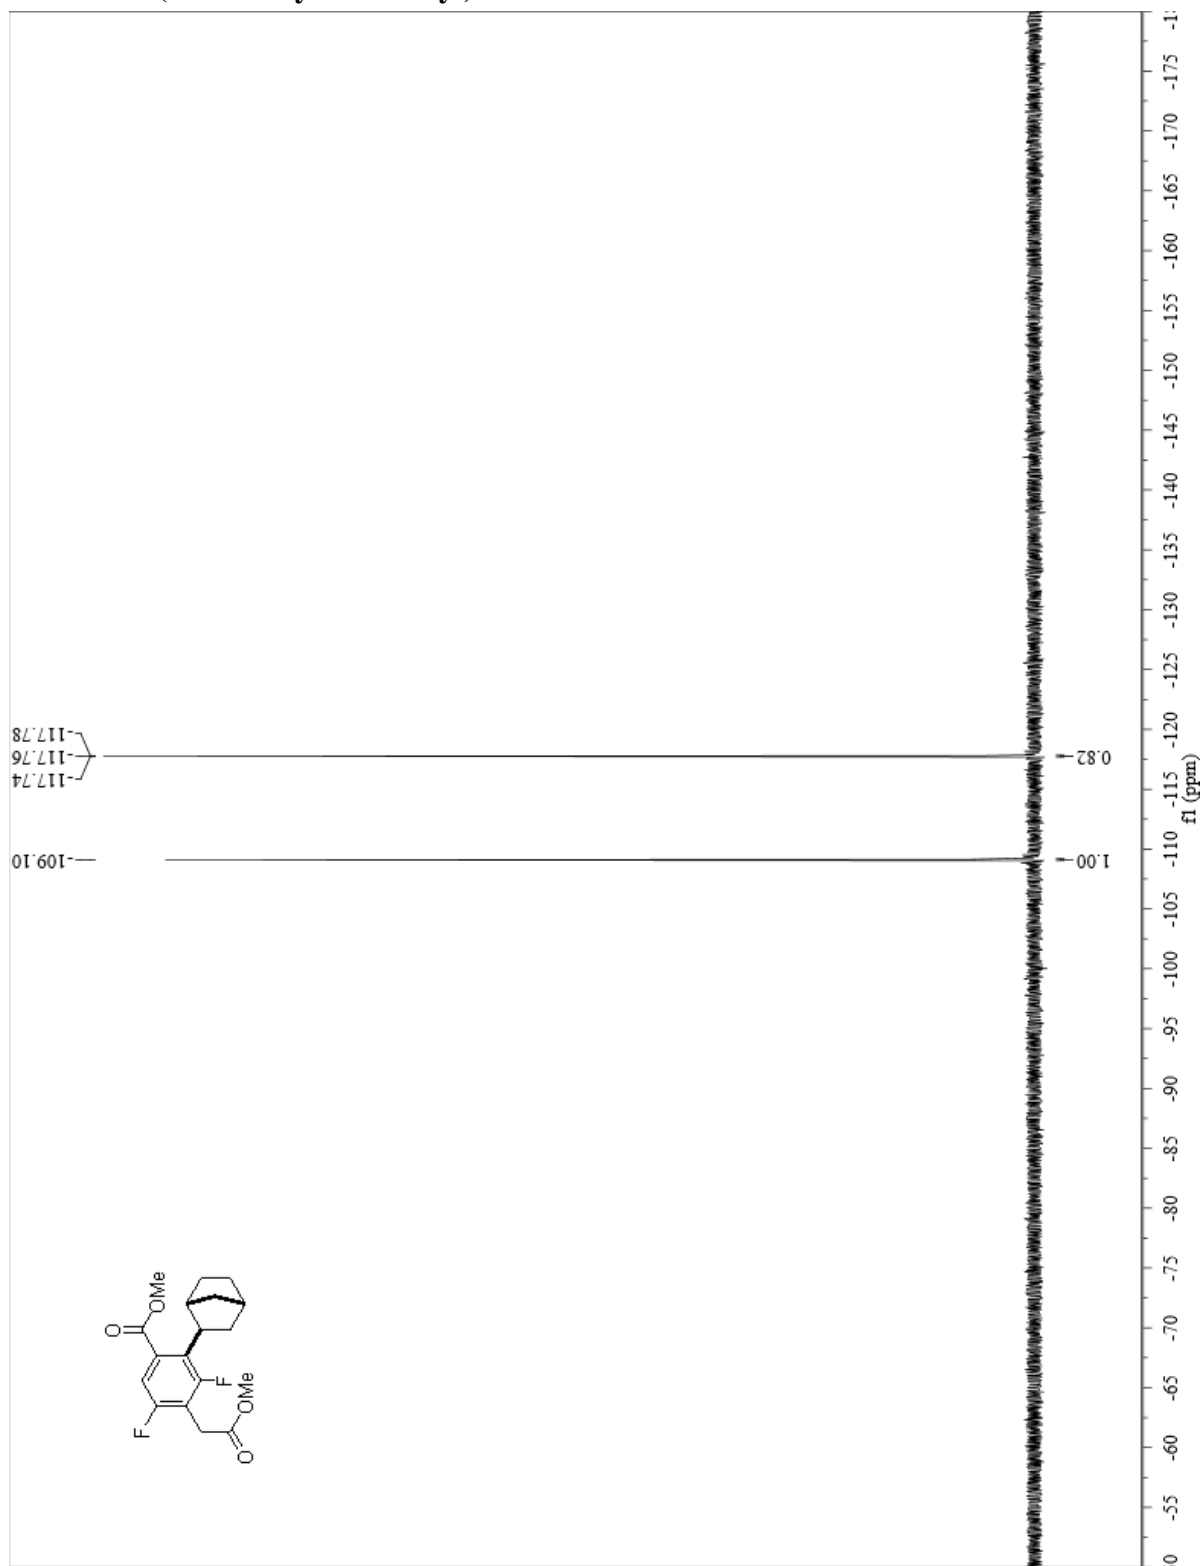

**<sup>1</sup>H NMR (400 MHz, Chloroform-*d*, @ rt) of S-34a methyl 2-(bicyclo[2.2.1]heptan-2-yl)-3,5-difluoro-4-(2-methoxy-2-oxoethyl)benzoate**

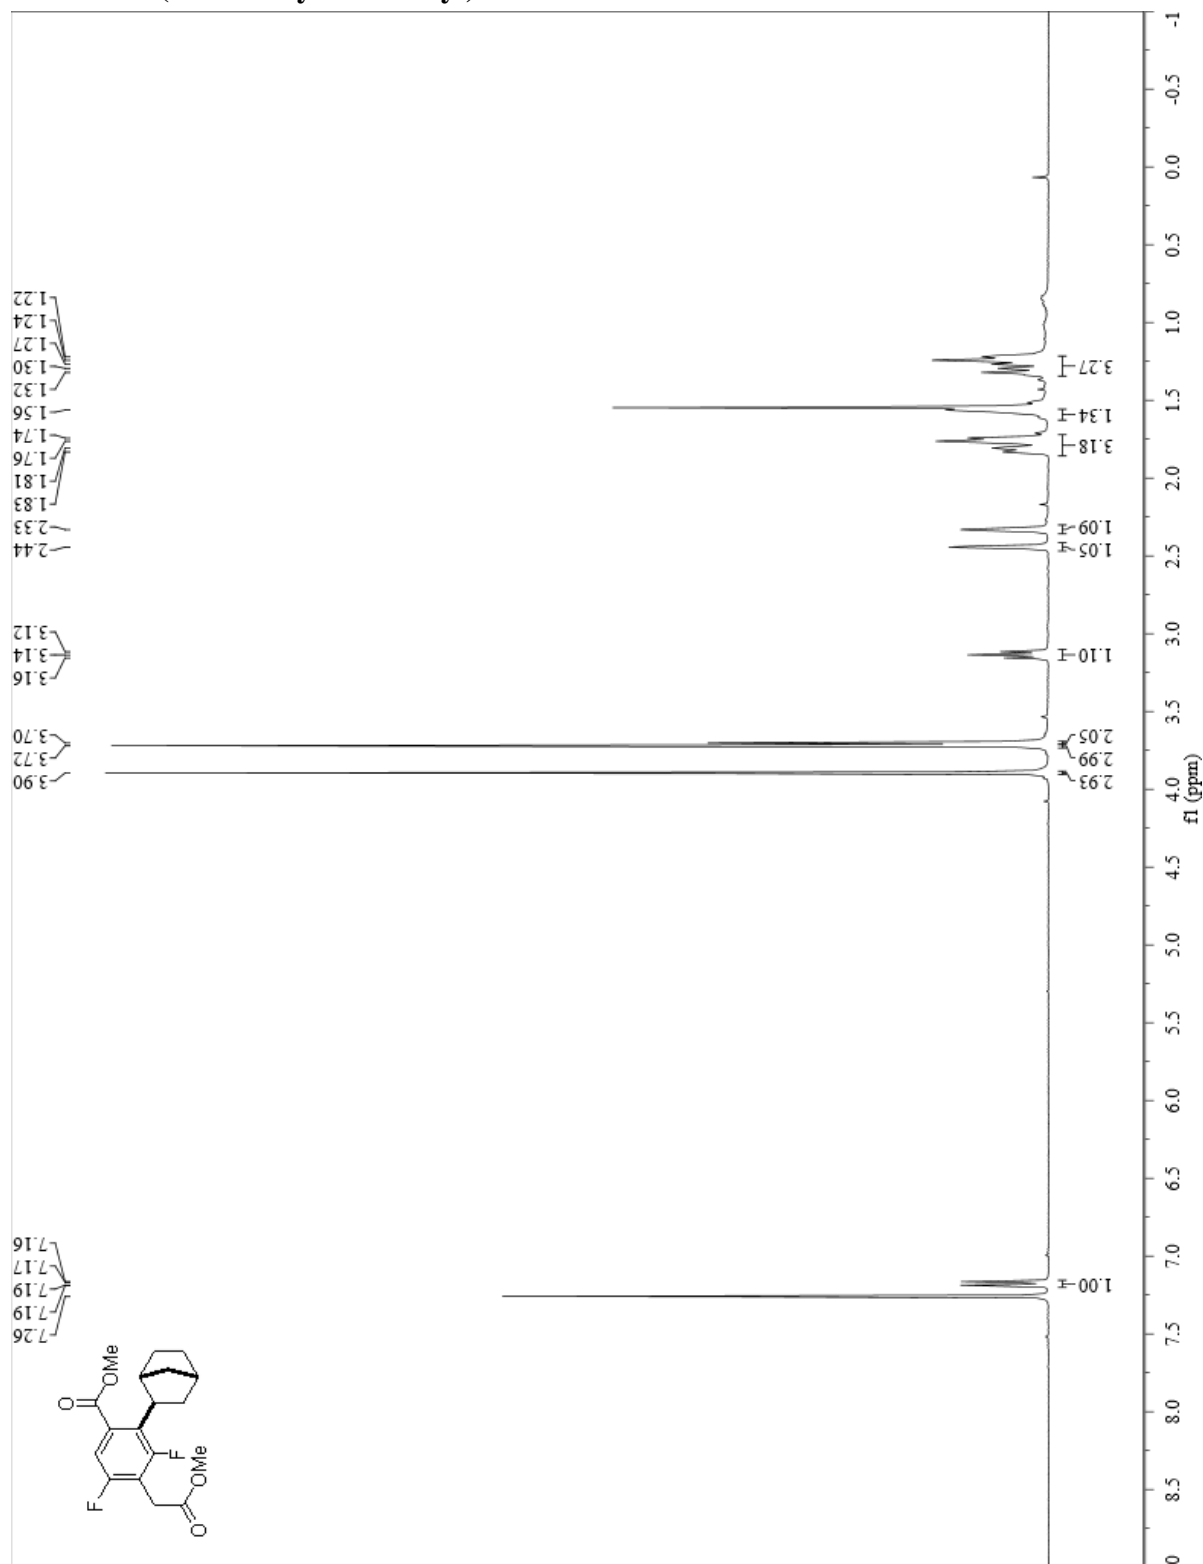

**$^{13}\text{C}\{^1\text{H}\}$  NMR (101 MHz, Chloroform-*d*, @ rt) of S-34a methyl 2-(bicyclo[2.2.1]heptan-2-yl)-3,5-difluoro-4-(2-methoxy-2-oxoethyl)benzoate**

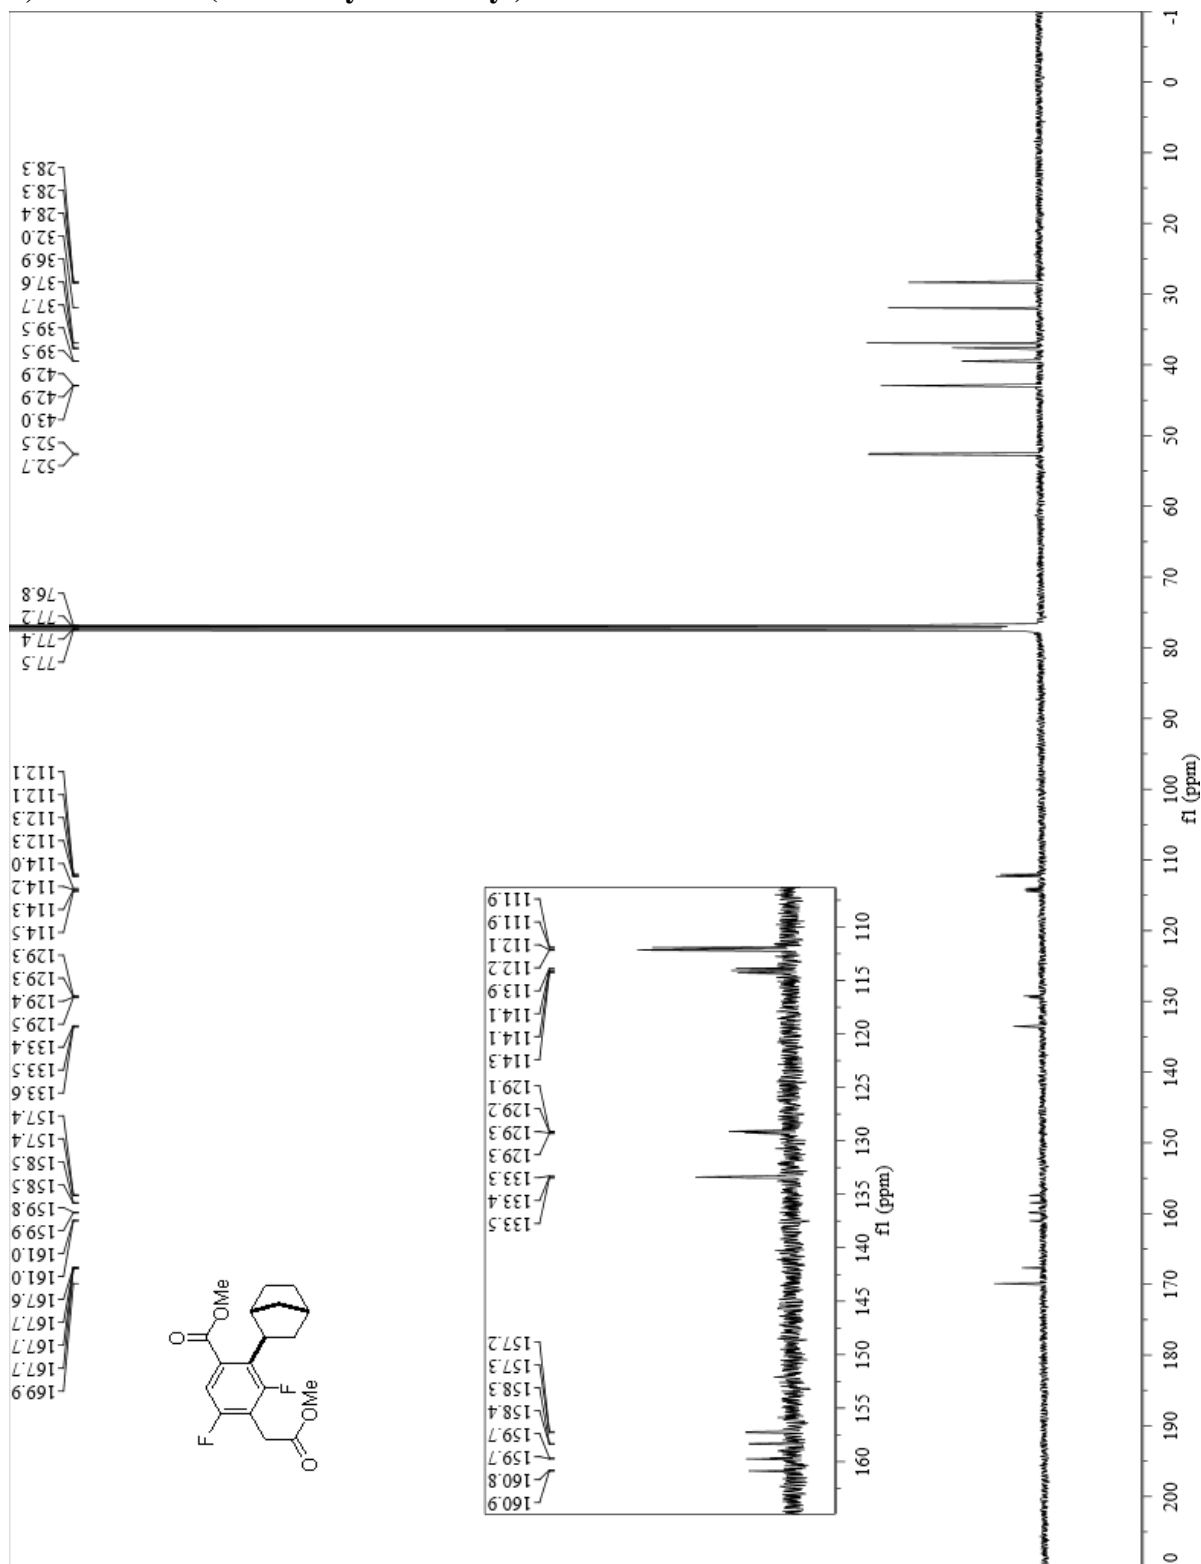

**GC and MS of S-34a methyl 2-(bicyclo[2.2.1]heptan-2-yl)-3,5-difluoro-4-(2-methoxy-2-oxoethyl)benzoate**

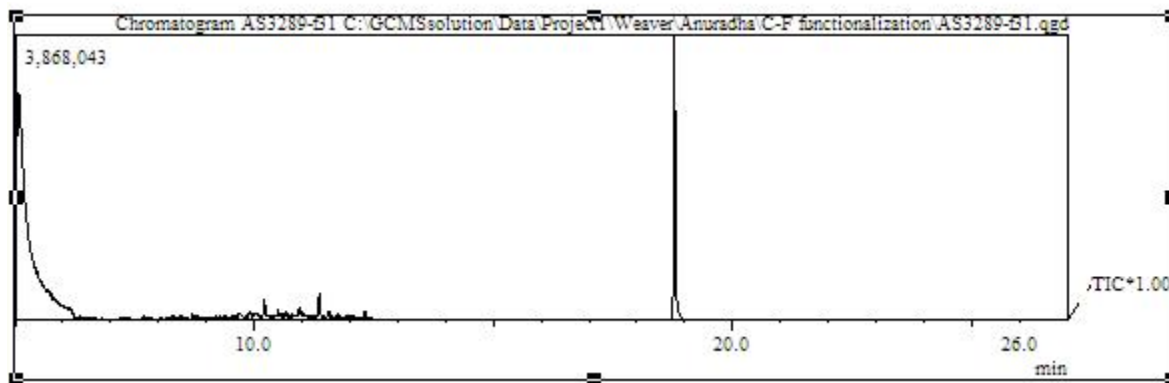

Spectrum

Line#:1 RTime:18.8(Scan#:1655)  
MassPeaks:242  
RawMode:Single 18.8(1655) BasePeak:59(318802)  
BG Mode:None

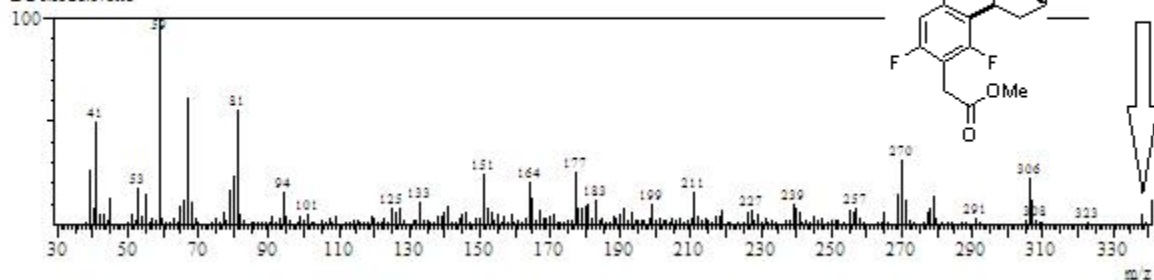



**<sup>19</sup>F NMR (376 MHz, Chloroform-*d*, @ rt) of S-35a N-(3-(bicyclo[2.2.1]heptan-2-yl)-2,6-difluoro-4-(trifluoromethyl)phenyl)acetamide**

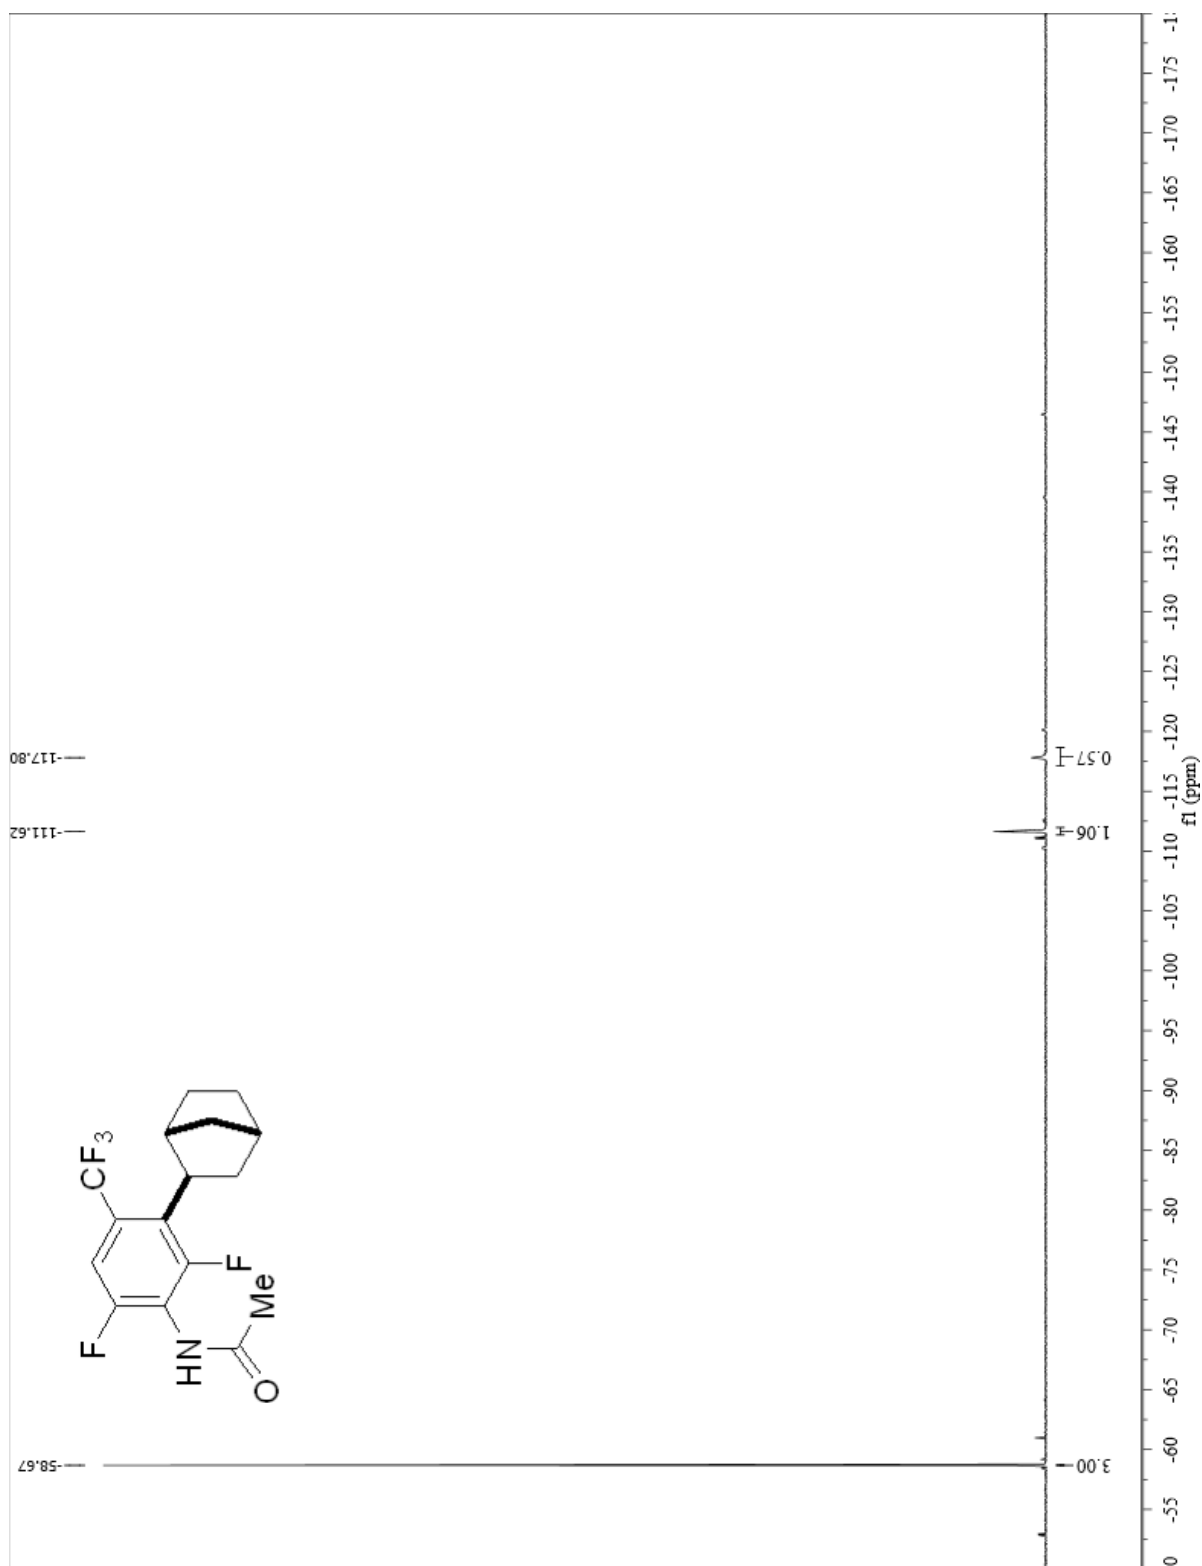

**<sup>1</sup>H NMR (400 MHz, Chloroform-*d*, @ rt) of S-35a N-(3-(bicyclo[2.2.1]heptan-2-yl)-2,6-difluoro-4-(trifluoromethyl)phenyl)acetamide**

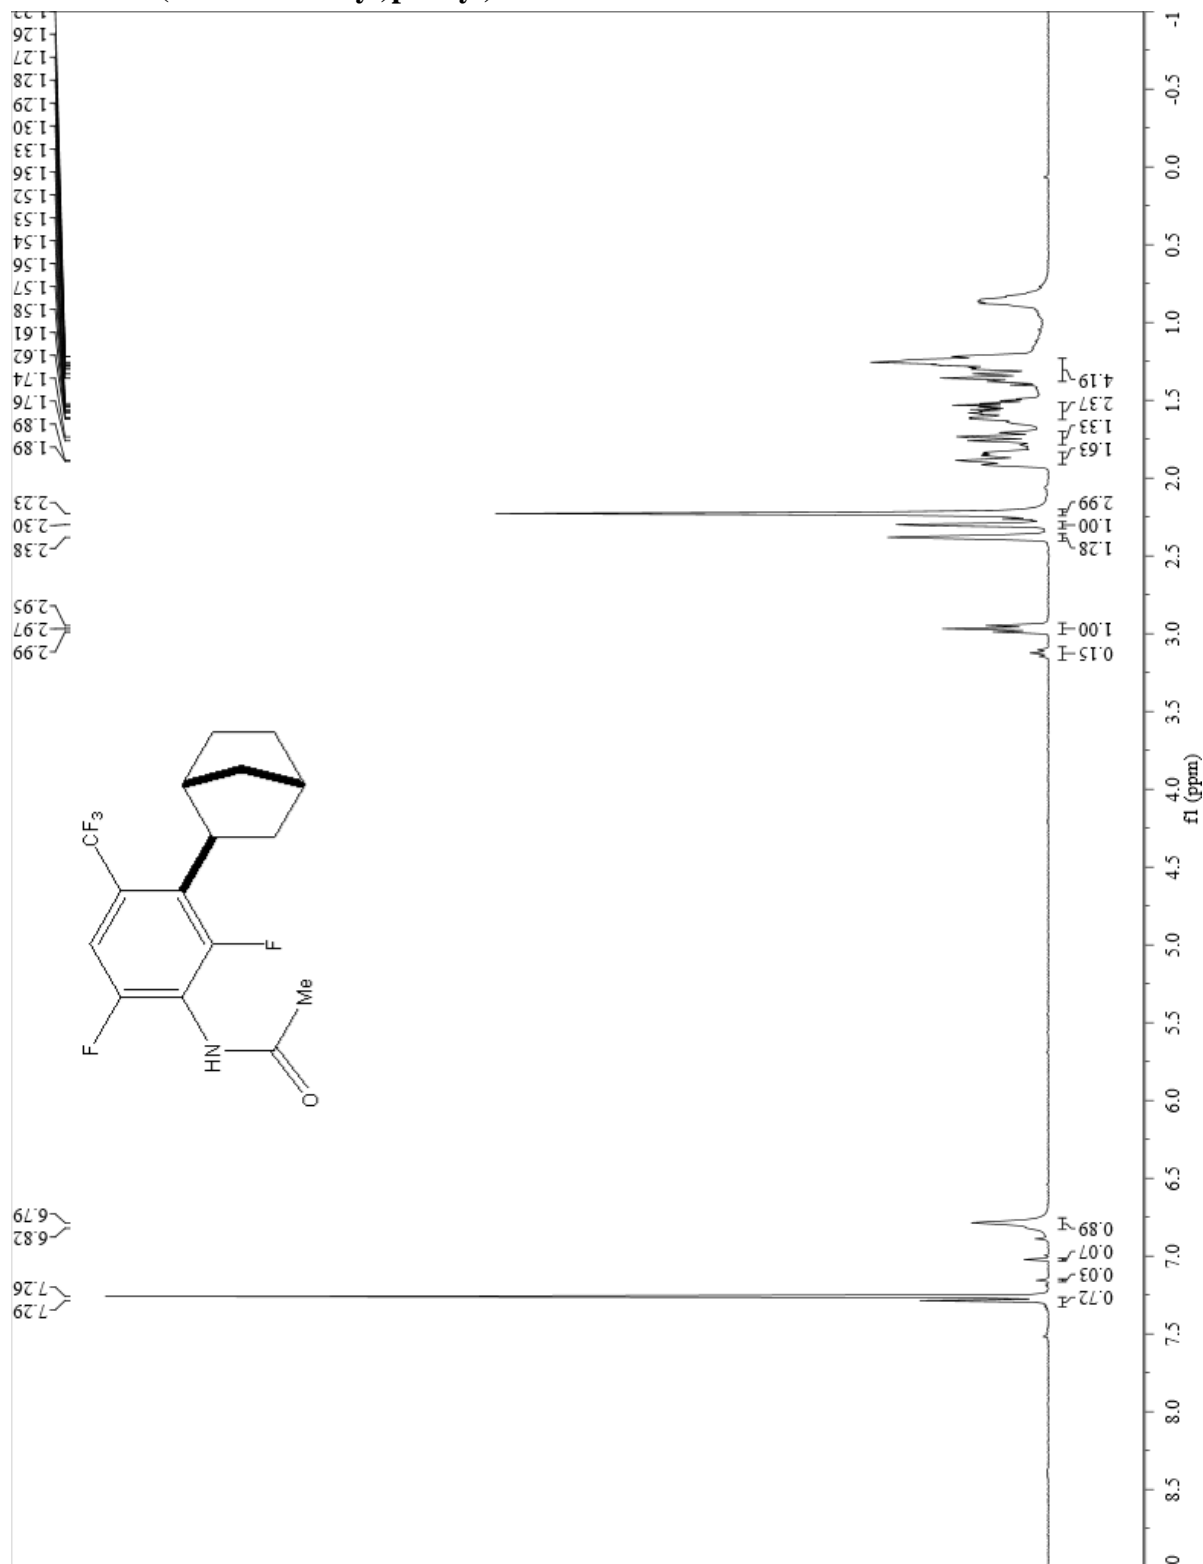

**$^{13}\text{C}\{^1\text{H}\}$  NMR (101 MHz, Chloroform-*d*, @ rt) of S-35a N-(3-(bicyclo[2.2.1]heptan-2-yl)-2,6-difluoro-4-(trifluoromethyl)phenyl)acetamide**

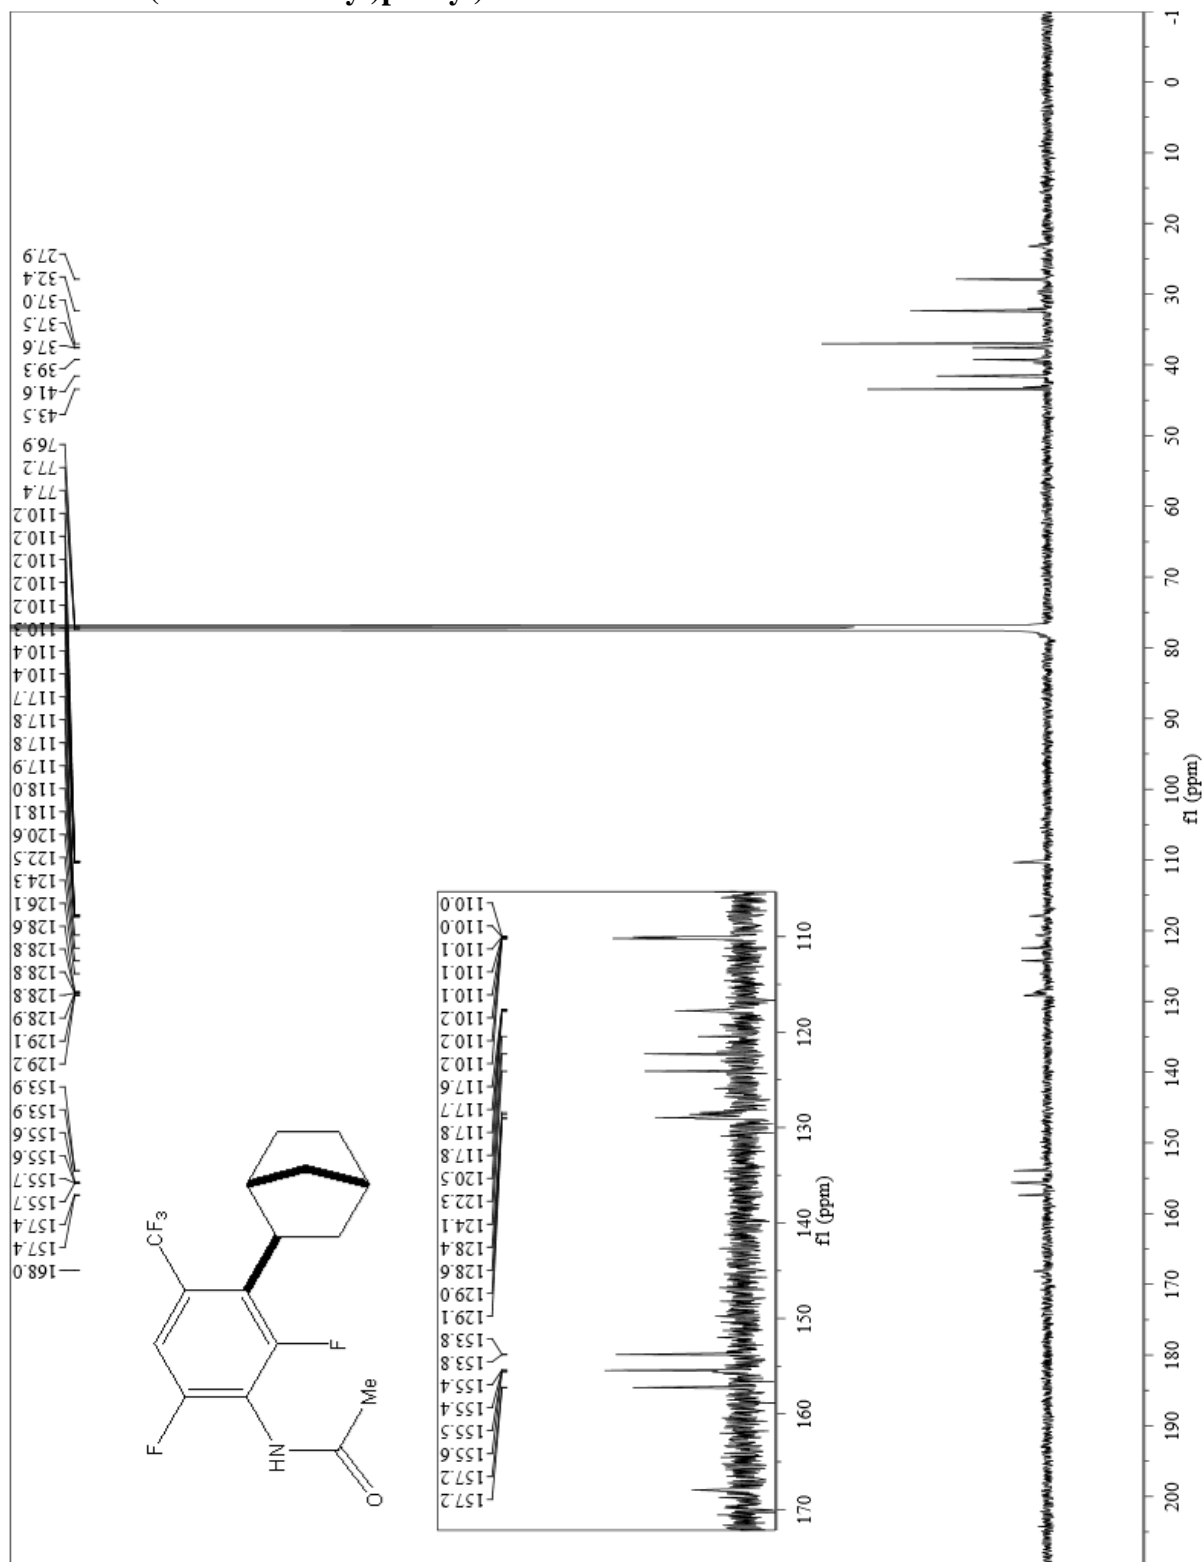

# GC and MS of S-35a N-(3-(bicyclo[2.2.1]heptan-2-yl)-2,6-difluoro-4-(trifluoromethyl)phenyl)acetamide

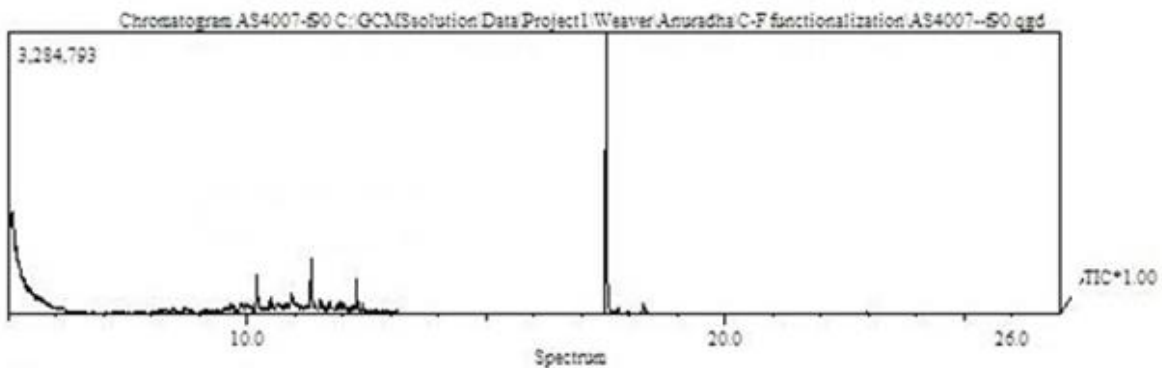

Line: 1 R Time: 17.5 (Scan: 1504)  
Mass Peaks: 181  
Raw Mode: Single 17.5 (1504) Base Peak: 43 (965125)  
BG Mode: None

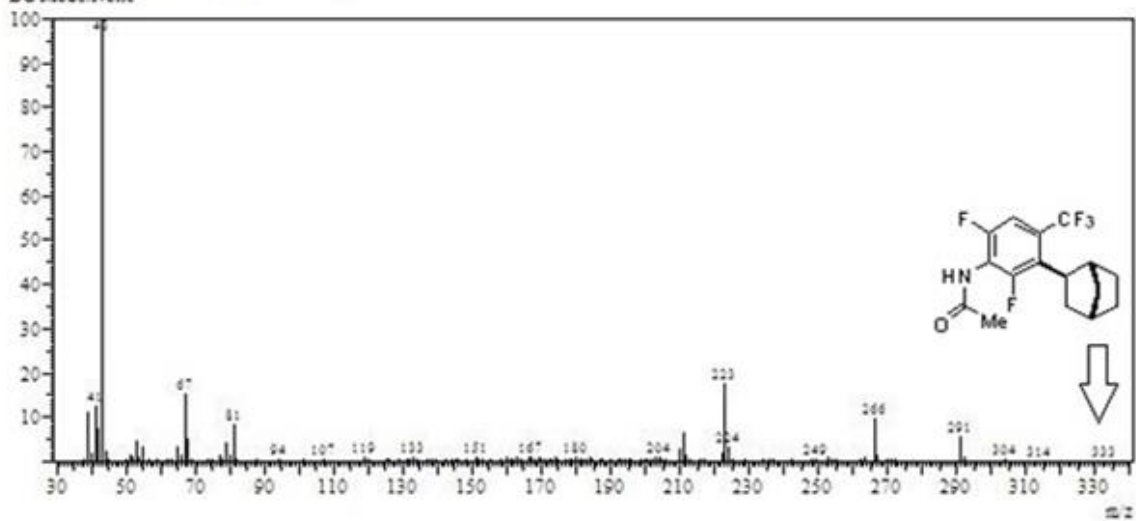

**<sup>19</sup>F NMR (376 MHz, Chloroform-*d*, @ rt) of S-36a' ethyl (2-(3-(bicyclo[2.2.1]heptan-2-yl)-2,5,6-trifluoro-4-(trifluoromethyl)phenyl)acetyl)glycinate**

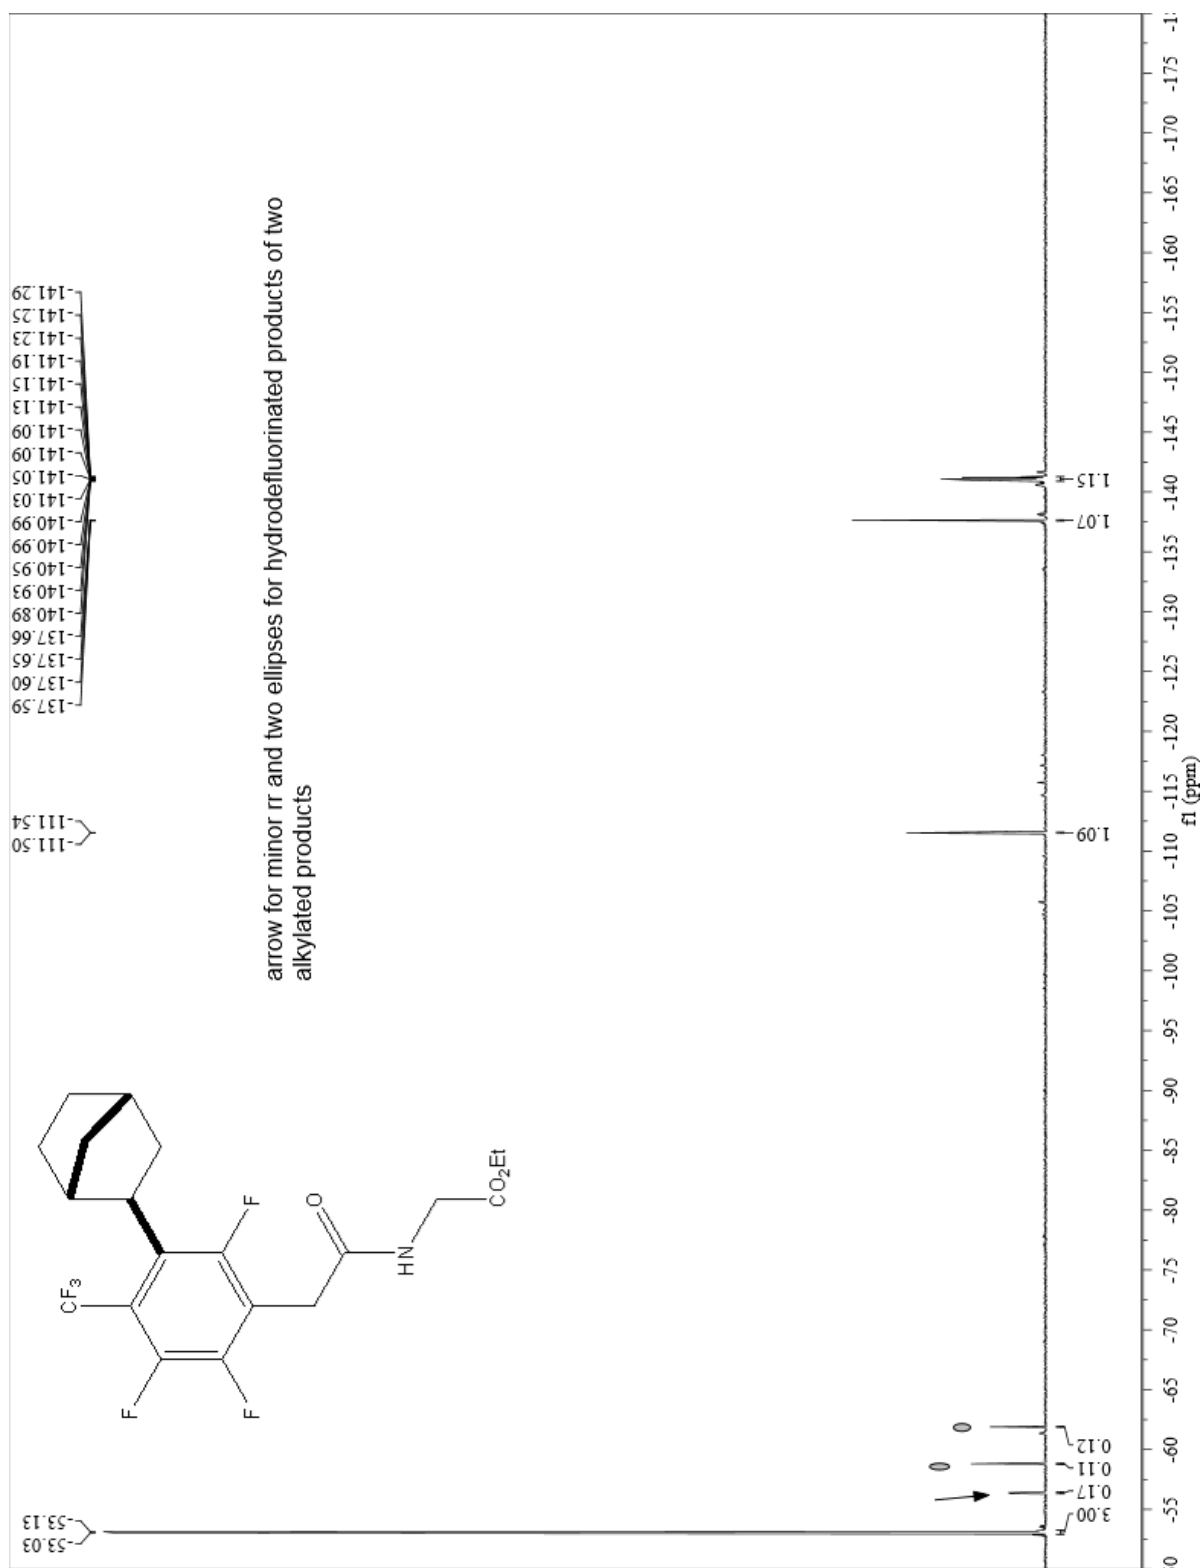

**<sup>1</sup>H NMR (400 MHz, Chloroform-*d*, @ rt) of S-36a' ethyl (2-(3-(bicyclo[2.2.1]heptan-2-yl)-2,5,6-trifluoro-4-(trifluoromethyl)phenyl)acetyl)glycinate**

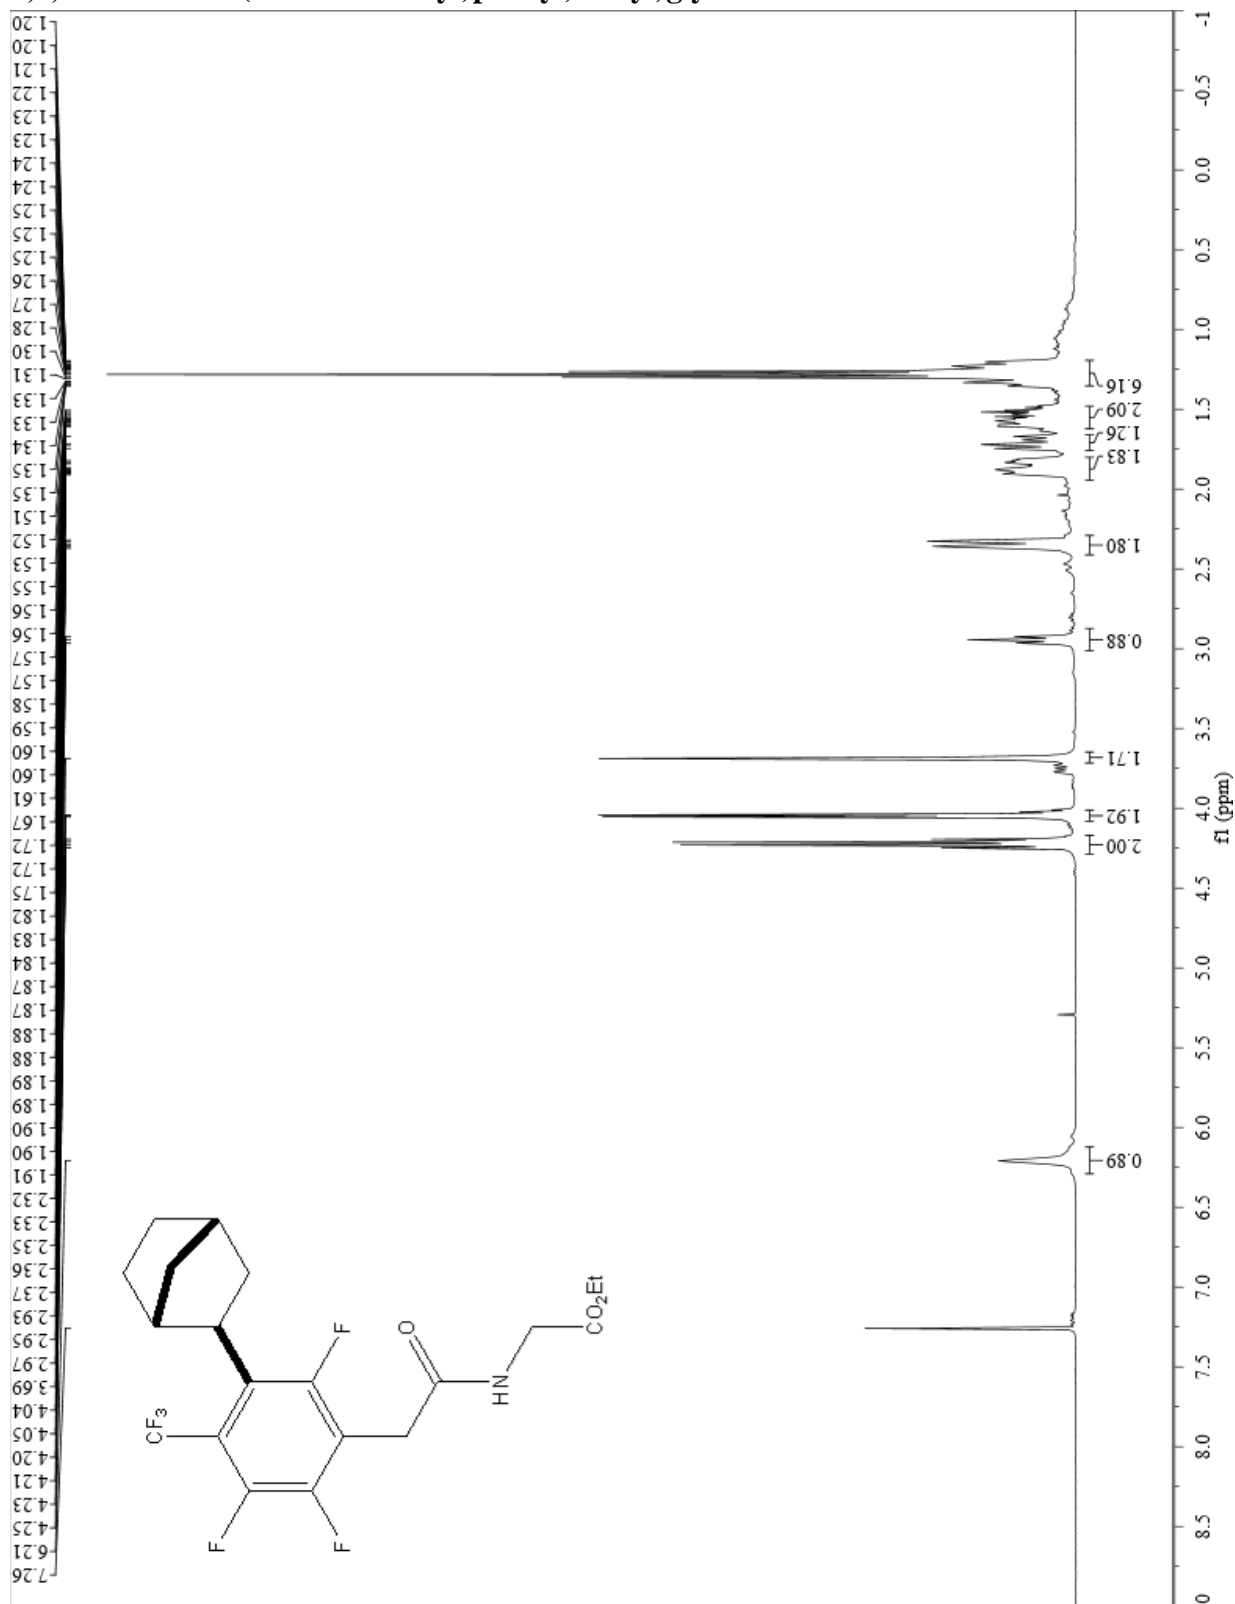

**$^{13}\text{C}\{^1\text{H}\}$  NMR (101 MHz, Chloroform-*d*, @ rt) of S-36a' ethyl (2-(3-(bicyclo[2.2.1]heptan-2-yl)-2,5,6-trifluoro-4-(trifluoromethyl)phenyl)acetyl)glycinate**

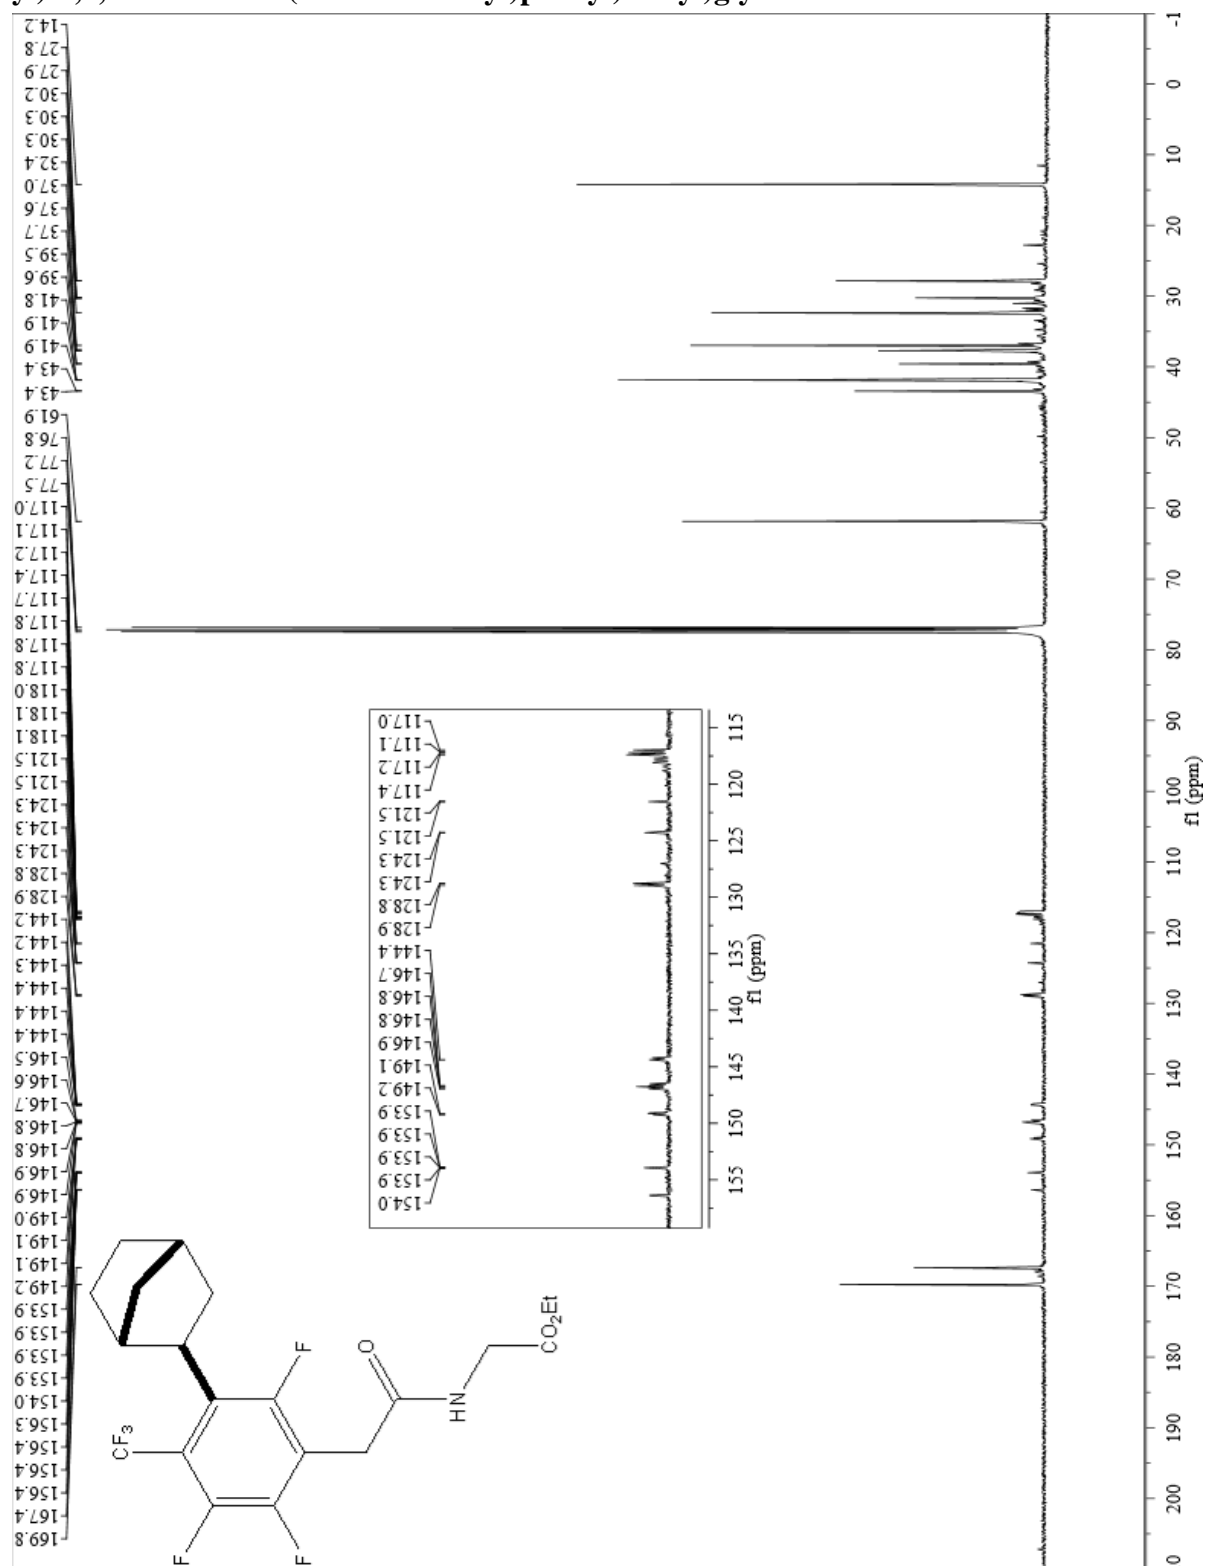

**GC and MS of S-36a' ethyl (2-(3-(bicyclo[2.2.1]heptan-2-yl)-2,5,6-trifluoro-4-(trifluoromethyl)phenyl)acetyl)glycinate**

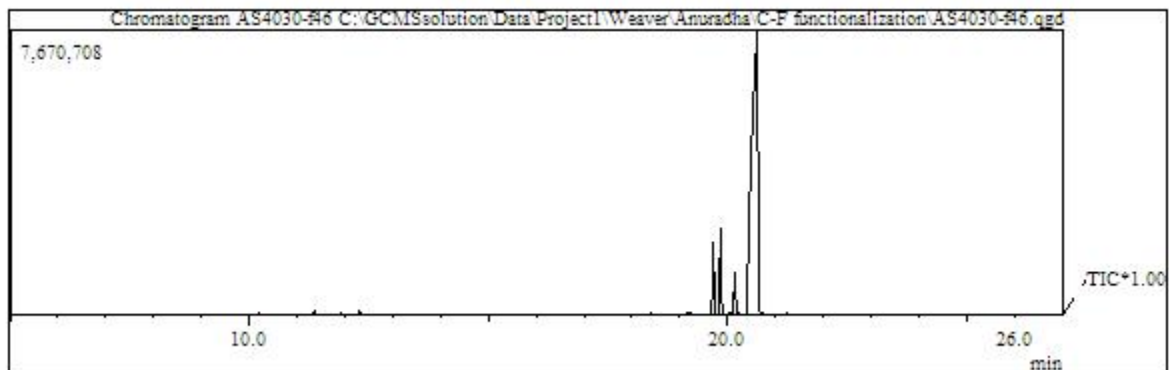

Spectrum

Line#:1 R.Time:20.5(Scan#:1863)  
MassPeaks:268  
RawMode:Single 20.5(1863) BasePeak:67(464988)  
BG Mode:None

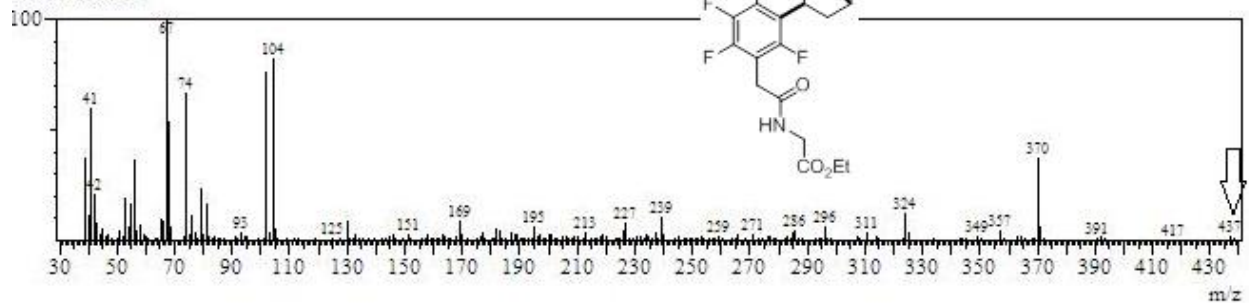



## Spectrum

Line# 1 R.Time:20.2(Scan#:1820)  
MassPeaks:163  
RawMode:Single 20.2(1820) BasePeak:104(150754)  
BG Mode:None

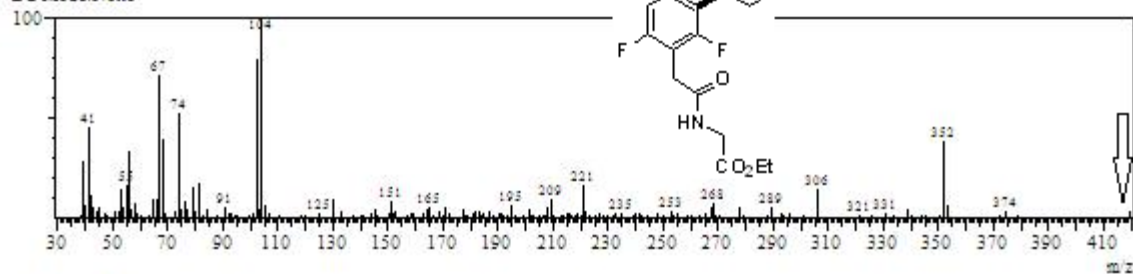

Line# 2 R.Time:19.9(Scan#:1786)  
MassPeaks:96  
RawMode:Single 19.9(1786) BasePeak:104(56190)  
BG Mode:None

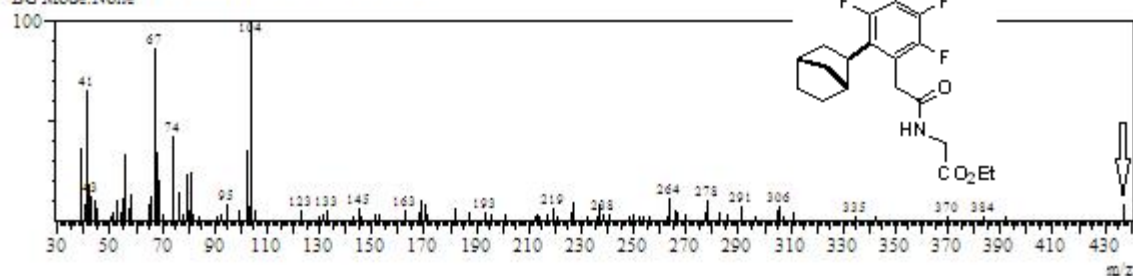

Line# 3 R.Time:19.7(Scan#:1766)  
MassPeaks:157  
RawMode:Single 19.7(1766) BasePeak:104(163665)  
BG Mode:None

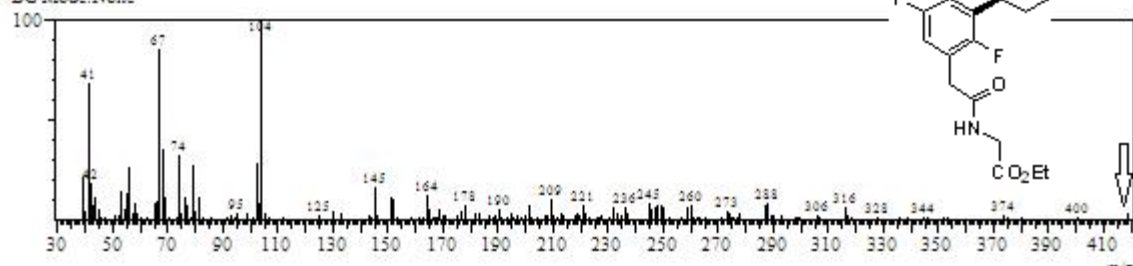

**<sup>19</sup>F NMR (376 MHz, Chloroform-*d*, @ rt) of S-36a ethyl (2-(3-(bicyclo[2.2.1]heptan-2-yl)-2,5,6-trifluoro-4-(trifluoromethyl)phenyl)acetyl)glycinate**

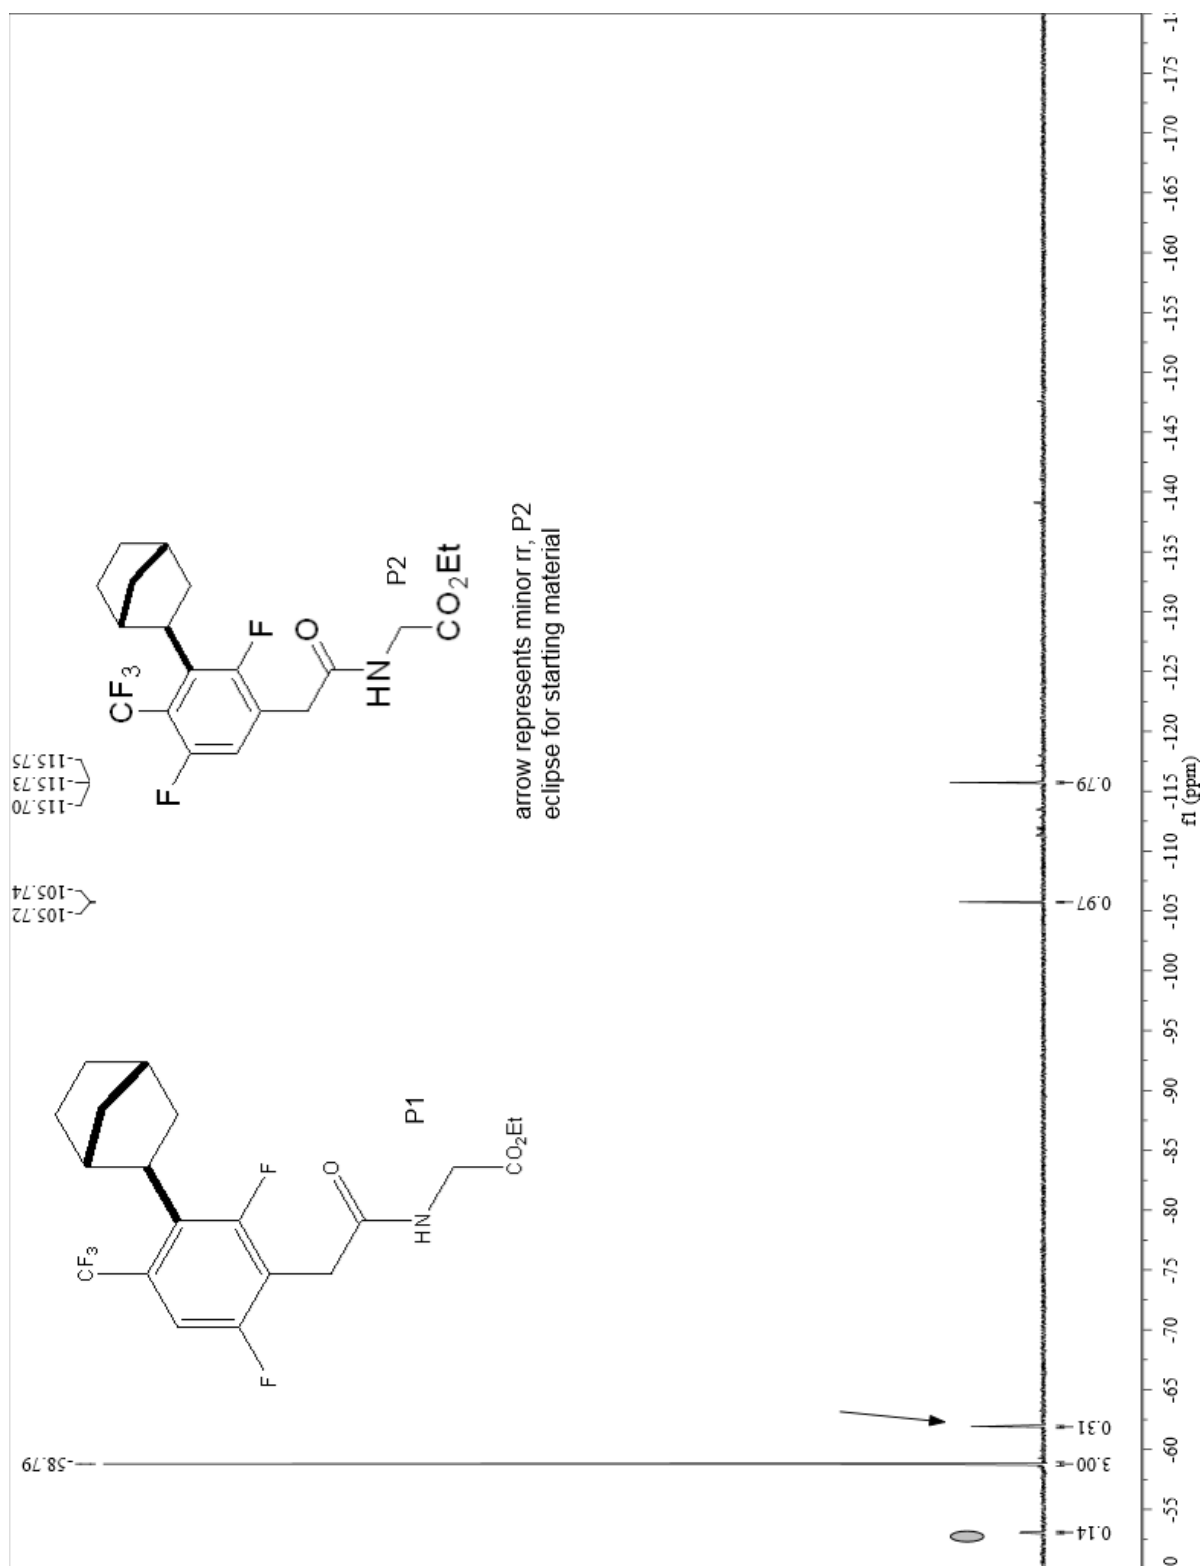

**<sup>1</sup>H NMR (400 MHz, Chloroform-*d*, @ rt) of S-36a ethyl (2-(3-(bicyclo[2.2.1]heptan-2-yl)-2,5,6-trifluoro-4-(trifluoromethyl)phenyl)acetyl)glycinate**

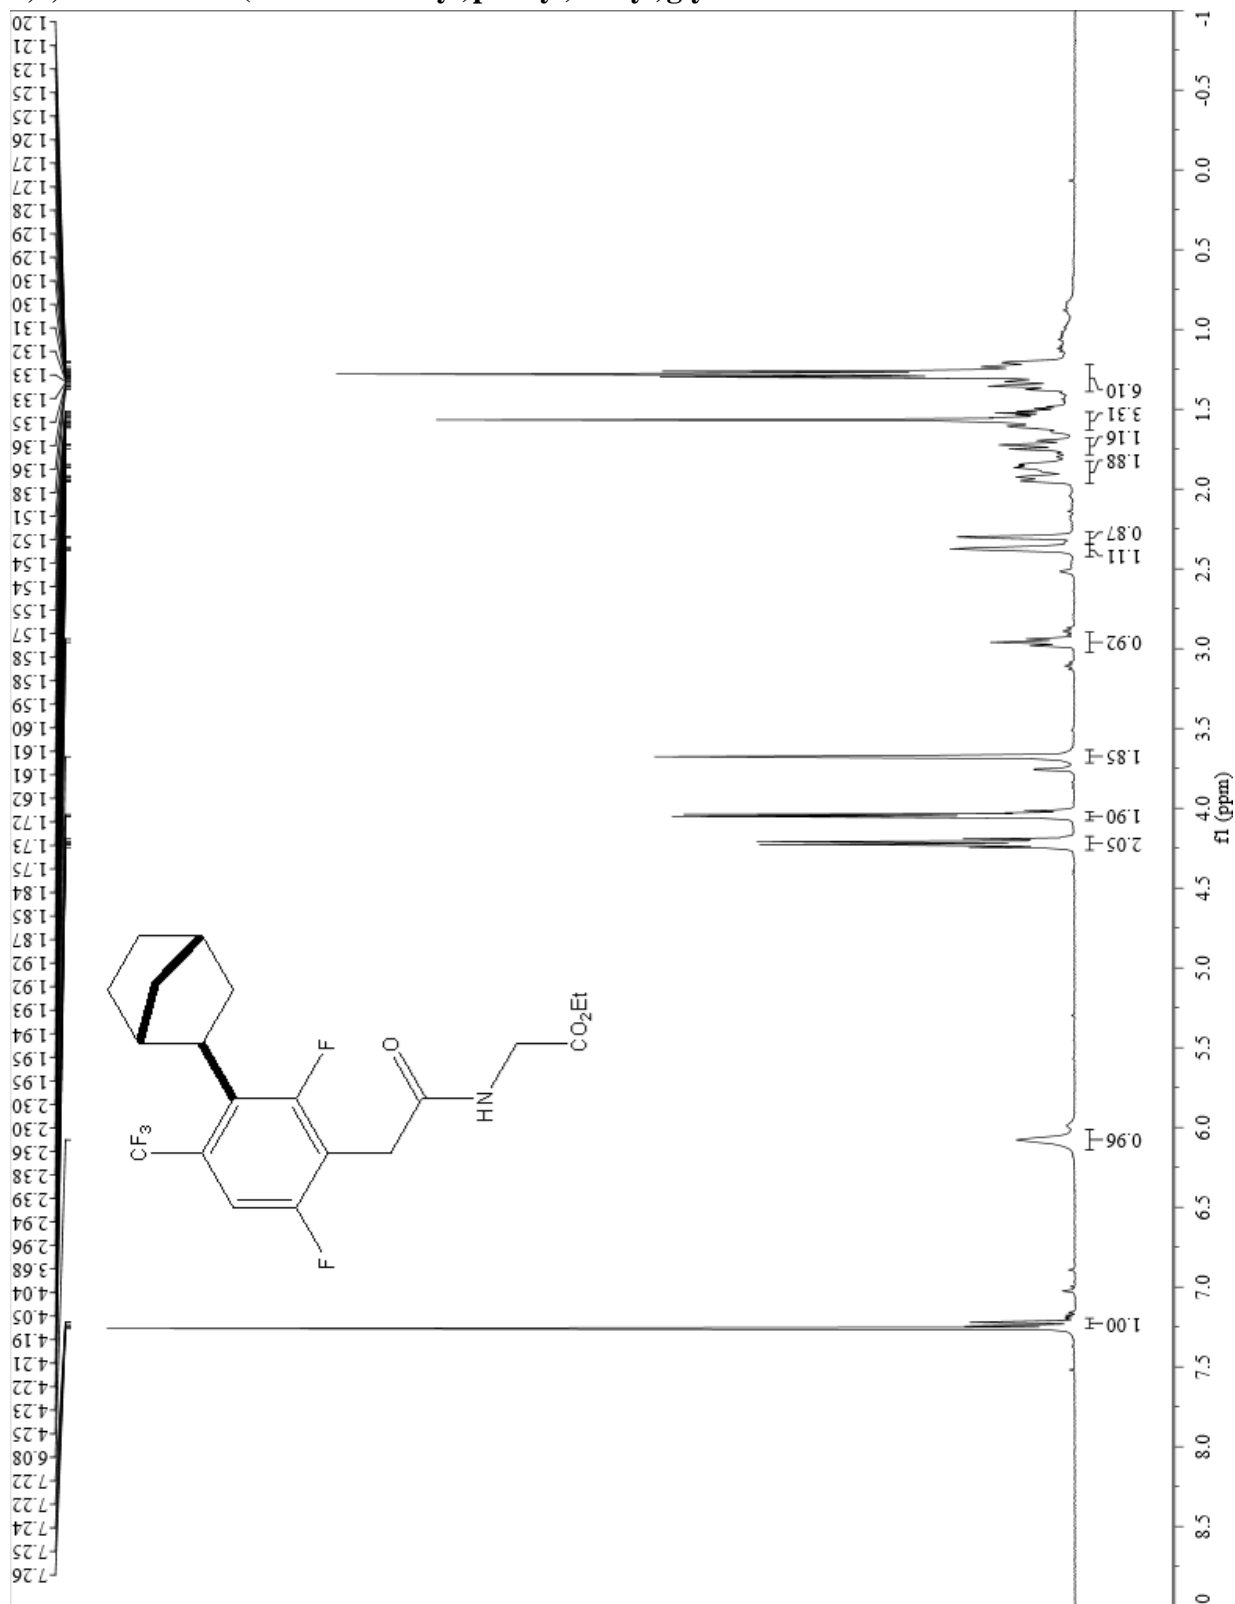

**$^{13}\text{C}\{^1\text{H}\}$  NMR (151 MHz, Chloroform-*d*, @ rt) of S-36a ethyl (2-(3-(bicyclo[2.2.1]heptan-2-yl)-2,5,6-trifluoro-4-(trifluoromethyl)phenyl)acetyl)glycinate**

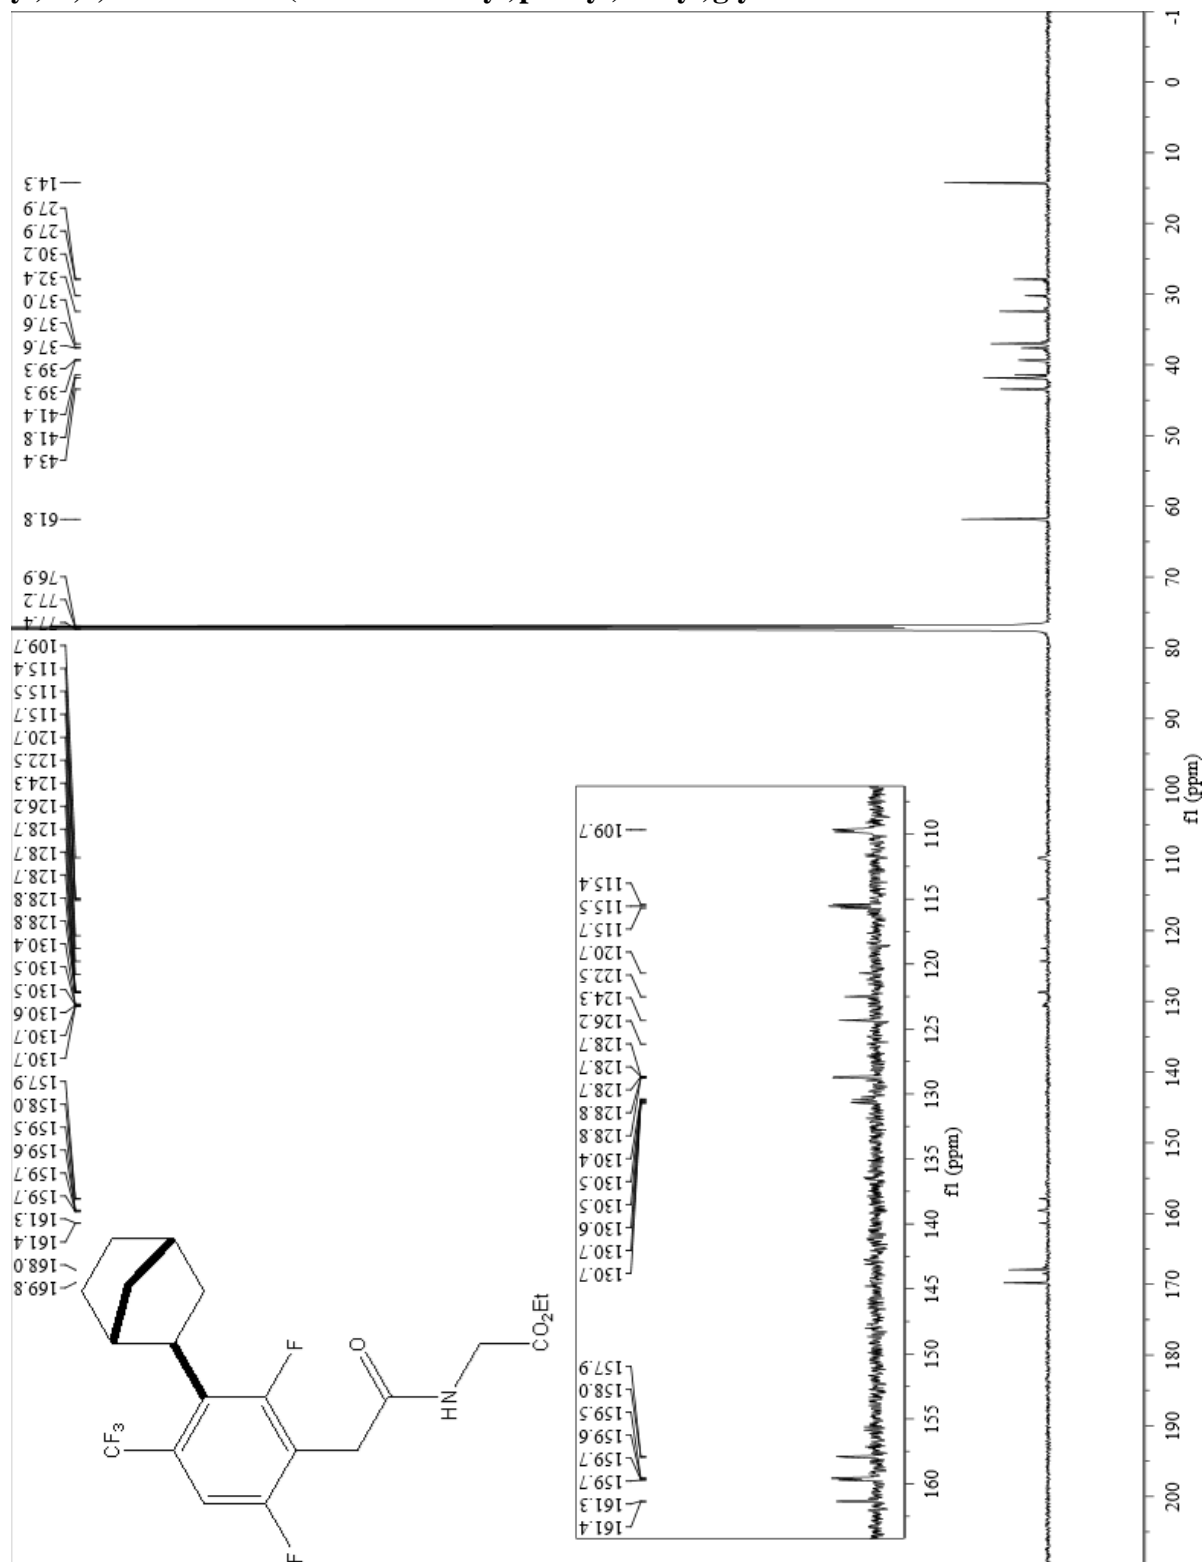

**GC and MS of S-36a ethyl (2-(3-(bicyclo[2.2.1]heptan-2-yl)-2,5,6-trifluoro-4-(trifluoromethyl)phenyl)acetyl)glycinate**

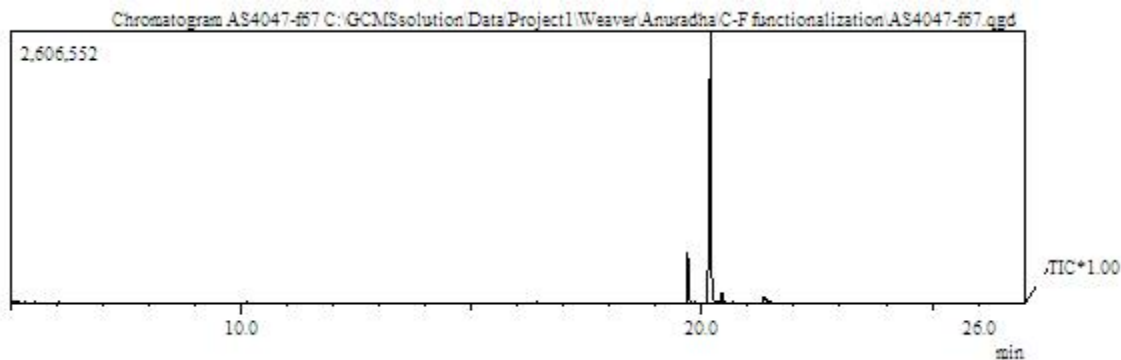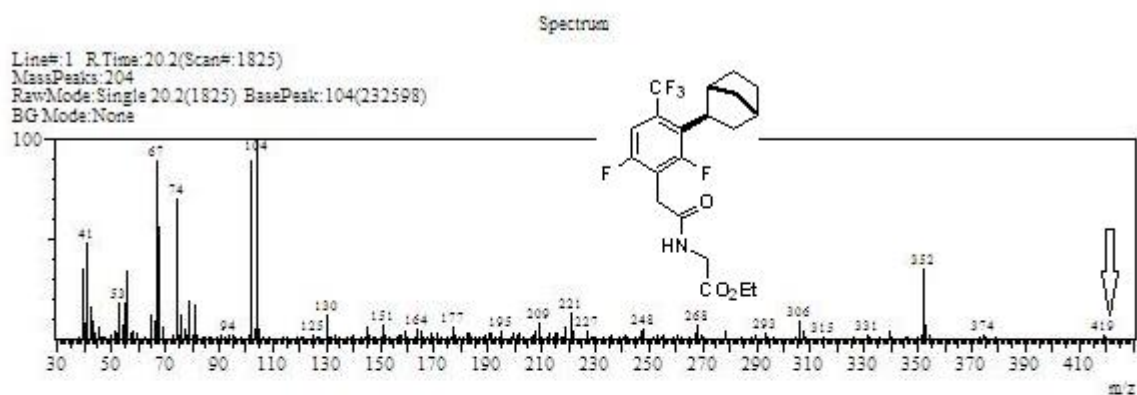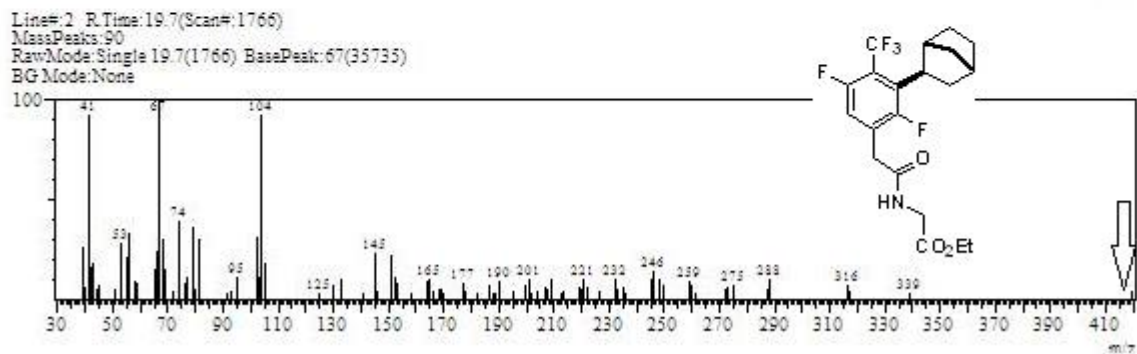

Supplement: c5sc03013g1.pdf [file c5sc03013g1.pdf]
